# Supplementary material for: Carbonyl group directed synthesis of 3-boryl-3-substituted alkenyl oxindoles and tetrasubstituted β-borylenones
Source: Royal Society of Chemistry journal article supplement (doi:10.1039/d3cc04788a), 2023-01-01

## Supporting Information

# Carbonyl Group Directed Synthesis of 3-Boryl-3-Substituted Alkenyl Oxindoles and Tetrasubstituted $\beta$ -Borylenones

Debraj Ghorai, Kanak Kanti Das, Dr. Santanu Panda

*Indian Institute of Technology, Kharagpur, 721302, India*

[spanda@chem.iitkgp.ac.in](mailto:spanda@chem.iitkgp.ac.in)

### Table of contents:

|                                                                                                                                      |                |
|--------------------------------------------------------------------------------------------------------------------------------------|----------------|
| <b>1. General information</b>                                                                                                        | <b>S2</b>      |
| <b>2. Experimental procedures and spectral data of all compounds</b>                                                                 | <b>S2-S7</b>   |
| <b>2a. General procedure for the Boron-Wittig reaction with N-alkyl-oxindole and corresponding spectra value</b>                     | <b>S3-S10</b>  |
| <b>2b. General procedure for the Boron-Wittig reaction with <math>\alpha</math>-keto-ester/amide and corresponding spectra value</b> | <b>S11-S17</b> |
| <b>2c. General procedure for the Zweifel Olefination Reaction and corresponding spectra value</b>                                    | <b>S17-S19</b> |
| <b>2d. General procedure for the Suzuki-Miyaura Cross-Coupling Reaction and corresponding spectra value</b>                          | <b>S20-S22</b> |
| <b>2e. General procedure for the synthesis of 1,3 di-carbonyl compound and corresponding spectra value</b>                           | <b>S22-S25</b> |
| <b>2f. Large scale synthesis of AMPK activator and corresponding spectra value</b>                                                   | <b>S25-S27</b> |
| <b>3. <math>^{11}</math> B-NMR study of crude reaction with <math>\alpha</math>-keto-amide:</b>                                      | <b>S27-S29</b> |
| <b>4. Crystallographic Data and Structure Refinements</b>                                                                            | <b>S30-S34</b> |
| <b>5. NMR spectra of compounds</b>                                                                                                   | <b>S34-S95</b> |

|                                   |            |
|-----------------------------------|------------|
| <b>6. References</b>              | <b>S96</b> |
| <b>7. checkCIF/PLATON reports</b> |            |

## 1. General information

General Methods: All the solvents were distilled prior to use. Dry solvents were prepared according to the standard procedures. All other reagents were used as received from either Aldrich or Lancaster chemical companies. Reactions requiring an inert atmosphere were carried out under an argon atmosphere. Infrared (IR) spectra were recorded on a JASCO 4100 FT-IR spectrometer. <sup>1</sup>H NMR spectra were measured on Bruker AVANCE 400 MHz and 500 MHz spectrometers. Chemical shifts were reported in ppm relative to solvent signals. <sup>13</sup>C NMR spectra were recorded on Bruker 100 MHz and 125 MHz spectrometers with complete proton decoupling. Chemical shifts were reported in ppm from the residual solvent as an internal standard. The high-resolution mass spectra (HRMS) were performed on Micromass QTOF micro mass spectrometer equipped with a Harvard apparatus syringe pump. X-ray crystallographic data were recorded using Bruker-AXS Kappa CCD-Diffractometer with graphite monochromator MoK $\alpha$  radiation ( $\lambda=0.7107$  Å). The structures were solved by direct methods (SHELXS-97) and refined by full-matrix least squares techniques against F<sup>2</sup> (SHELXL-97). Hydrogen atoms were inserted from geometry consideration using the HFIX option of the program. For thin layer chromatography (TLC) analysis throughout this work, *E*-merck precoated TLC plates (silica gel 60 F254 grade, 0.25 mm) were used. Acme (India) silica gel (100-200 mesh) was used for column chromatography. Here all the geminal bis-pinacol-boronate esters have been synthesized by following ref<sup>1</sup> and all the keto-ester, keto-amide<sup>2</sup>, and *N*-alkyl isatin were synthesized using literature reports.<sup>3</sup>

## 2. Experimental procedures:

### 2a. General procedure for the Boron-Wittig reaction with *N*-alkyl-oxindole:

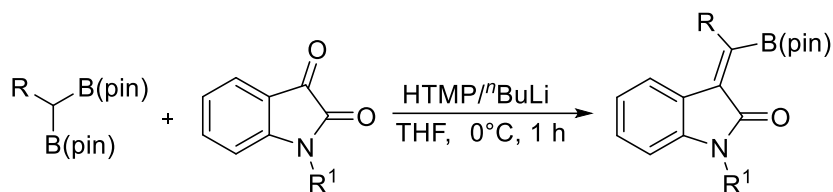

To a flame-dried reaction tube, 2,2,6,6-Tetramethylpiperidine (HTMP) (0.24 mmol, 1.2 equiv) in dry THF (1 mL) at -78 °C was added n-BuLi (1.2 equiv) drop-wise for 5 min under argon atmosphere. The reaction mixture was stirred for 30 min at the same temperature. The reaction was then cooled to 0 °C and stirred for another 30 min. Geminal-bis boronates (0.24 mmol, 1.2 equiv) dissolved in dry THF (1 ml) were added to the reaction mixture and stirred for 5 min. Then the reaction mixture was transferred to a solution of N-alkyl-oxindole (0.20 mmol) in THF at 0 °C and further stirred for 1h (for aromatic Geminal-bis boronates the reaction was stirred for 10 min). After completion of the reaction 2ml water was added and the product was extracted with EtOAc (3 × 5 mL). The organic layer was dried over Na<sub>2</sub>SO<sub>4</sub> and concentrated in a vacuum to afford the crude product. This crude material was further purified by flash column chromatography using silica gel.

**(E)-1-methyl-3-(2-methyl-1-(4,4,5,5-tetramethyl-1,3,2-dioxaborolan-2-yl)propylidene)indolin-2-one (2a):**

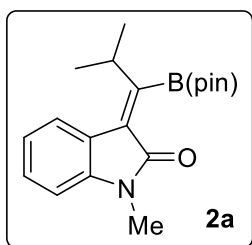

Synthesized using general procedure **2a**, purified by silica gel flash column chromatography (25% EtOAc/hexane), yellow solid compound, yield (44 mg) 67%. <sup>1</sup>H NMR (500 MHz, CDCl<sub>3</sub>) δ 7.58 (d, *J* = 7.7 Hz, 1H), 7.23 (t, *J* = 7.7 Hz, 1H), 7.00 (t, *J* = 7.6 Hz, 1H), 6.78 (d, *J* = 8.2 Hz, 1H), 3.51 (hept, *J* = 6.8 Hz, 1H), 1.44 (s, 12H), 1.27 (d, *J* = 6.9 Hz, 6H).; <sup>13</sup>C NMR (126 MHz, CDCl<sub>3</sub>) δ 169.07, 144.62, 130.72, 128.63, 124.12, 122.29, 122.09, 108.11, 84.25, 31.05, 26.16, 25.62, 21.52. HRMS (ESI): *m/z* calculated for [C<sub>19</sub>H<sub>26</sub>BNO<sub>3</sub>+ H]<sup>+</sup> 328.2079, found: 328.2089. <sup>11</sup>B NMR (160 MHz, CDCl<sub>3</sub>) δ 31.84.

**(E)-1-benzyl-3-(2-methyl-1-(4,4,5,5-tetramethyl-1,3,2-dioxaborolan-2-yl)propylidene)indolin-2-one (2b):**

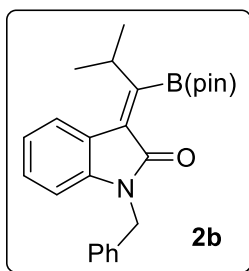

Synthesized using general procedure **2a**, purified by silica gel flash column chromatography (15% EtOAc/hexane), yellow gummy compound, yield (41 mg) 52%. <sup>1</sup>H NMR (400 MHz, CDCl<sub>3</sub>) δ ppm 7.58 (d, *J* = 7.08 Hz, 1H), 7.31-7.21 (m, 5H), 7.11-7.07 (m, 1H), 6.99-6.94 (m, 1H), 6.63-6.61 (m, 1H), 4.91(s, 2H), 3.54 (h, *J* = 6.9, 5.8 Hz, 1H), 1.45 (s, 12H), 1.30-1.28 (m, 6H), <sup>13</sup>C NMR (101 MHz, CDCl<sub>3</sub>) δ 169.02, 143.71, 136.16, 130.64, 128.74, 128.58, 127.46, 127.32, 124.17, 122.36, 122.14, 109.33, 84.35, 43.73, 31.11, 25.62, 21.55. HRMS (ESI): *m/z* calculated for [C<sub>25</sub>H<sub>30</sub>BNO<sub>3</sub>+ H]<sup>+</sup> 404.2392, found 404.2395.

**(E)-1-(methoxymethyl)-3-(2-methyl-1-(4,4,5,5-tetramethyl-1,3,2-dioxaborolan-2-yl)propylidene)indolin-2-one (2c):**

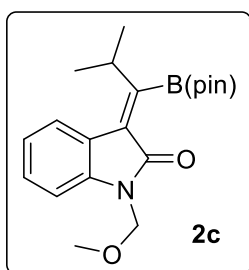

Synthesized using general procedure **2a**, purified by silica gel column chromatography (20% EtOAc/hexane), yellow gummy compound, yield (48 mg) 67%. <sup>1</sup>H NMR (400 MHz, CDCl<sub>3</sub>) δ ppm 7.62-7.59 (m, 1H), 7.27-7.22 (m, 1H), 7.07-7.01 (m, 2H), 5.13 (s, 2H), 3.57-3.48 (m, 1H), 3.31 (s, 3H), 1.44 (s, 12H), 1.29-1.27 (m, 6H), <sup>13</sup>C NMR (101 MHz, CDCl<sub>3</sub>) δ 169.19, 142.83, 130.40, 128.75, 124.15, 122.60, 122.03, 109.60, 84.25, 71.34, 56.16, 31.00, 25.48, 21.37. HRMS (ESI): *m/z* calculated for [C<sub>20</sub>H<sub>28</sub>BNO<sub>4</sub>+ H]<sup>+</sup> 358.2184, found 358.2163.

**(E)-1-methyl-3-(1-(4,4,5,5-tetramethyl-1,3,2-dioxaborolan-2-yl)butylidene)indolin-2-one (2d):**

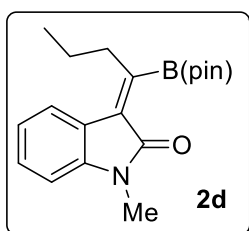

Synthesized using general procedure **2a**, purified by silica gel flash column chromatography (25% EtOAc/hexane), yellow gummy compound, yield (46 mg) 70%. <sup>1</sup>H NMR (400 MHz, CDCl<sub>3</sub>) δ ppm 7.54 (d, *J* = 7.48 Hz, 1H), 7.26-7.22 (m, 1H), 7.01 (t, *J* = 7.44 Hz, 1H), 6.79 (d, *J* = 7.48 Hz, 1H), 3.19 (s, 3H), 2.73-2.68 (m, 2H), 1.75-1.65 (m, 2H), 1.41 (s, 12H), 1.06 (t, *J* = 6.4 Hz, 3H), <sup>13</sup>C NMR (101 MHz, CDCl<sub>3</sub>) δ 168.91, 144.59, 132.08, 128.71, 123.84, 122.52, 122.16, 108.18, 84.17, 34.33, 26.20, 25.14, 21.48, 14.77. HRMS (ESI): *m/z* calculated for [C<sub>19</sub>H<sub>26</sub>BNO<sub>3</sub>+ H]<sup>+</sup> 328.2079, found: 328.2085.

**(E)-1-methyl-3-(4-methyl-1-(4,4,5,5-tetramethyl-1,3,2-dioxaborolan-2-yl)pentylidene)indolin-2-one (2e):**



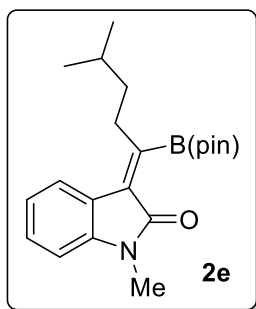

Synthesized using general procedure **2a**, purified by silica gel column chromatography (25% EtOAc/hexane), yellow gummy compound, yield (50 mg) 70%.  $^1\text{H}$  NMR (400 MHz,  $\text{CDCl}_3$ )  $\delta$  ppm 7.54 (d,  $J = 7.6$  Hz, 1H), 7.23 (d,  $J = 7.64$ , 1H), 7.02 (t,  $J = 7.6$  Hz, 1H), 6.79 (d,  $J = 7.8$  Hz, 1 H), 3.20 (s, 3H), 2.74-2.70 (m, 2H), 1.77-1.67 (m, 1H), 1.57-1.49 (m, 1H), 1.42(s, 12H), 0.97 (d,  $J = 6.6$  Hz, 6H);  $^{13}\text{C}$  NMR (101 MHz,  $\text{CDCl}_3$ )  $\delta$  168.88, 144.52, 131.68, 128.64, 123.65, 122.43, 122.15, 108.16, 84.14, 36.54, 30.07, 28.59, 26.17, 25.08, 22.51. HRMS (ESI):  $m/z$  calculated for  $[\text{C}_{21}\text{H}_{30}\text{BNO}_3 + \text{H}]^+$  356.2392, found: 356.2390.

**(E)-1-methyl-3-(1-(4,4,5,5-tetramethyl-1,3,2-dioxaborolan-2-yl)hexylidene)indolin-2-one (2f):**

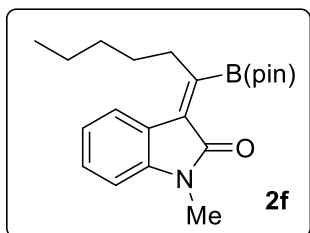

Synthesized using general procedure **2a**, purified by silica gel flash column chromatography (25% EtOAc/hexane), yellow gummy compound, yield (49 mg) 69%.  $^1\text{H}$  NMR (400 MHz,  $\text{CDCl}_3$ )  $\delta$  ppm 7.54 (d,  $J = 7.56$  Hz, 1H), 7.23 (d,  $J = 7.8$  Hz, 1H), 7.01(t,  $J = 7.52$  Hz, 1H), 6.79 (d,  $J = 7.84$  Hz, 1H), 3.20 (s, 3H), 2.72 (t,  $J = 8.08$  Hz, 1H), 1.69-1.64 (m, 2H), 1.47-1.45 (m, 1H), 1.42 (s, 12H), 1.40-1.32 (m, 3H), 0.91 (t,  $J = 7.24$  Hz, 3H);  $^{13}\text{C}$  NMR (126 MHz,  $\text{CDCl}_3$ )  $\delta$  168.94, 144.65, 131.93, 128.68, 123.81, 122.61, 122.16, 108.16, 84.17, 32.37, 32.30, 27.68, 26.18, 25.16, 22.63, 14.08. HRMS (ESI):  $m/z$  calculated for  $[\text{C}_{21}\text{H}_{30}\text{BNO}_3 + \text{H}]^+$  356.2392, found: 356.2393.

**(E)-1-methyl-3-(1-(4,4,5,5-tetramethyl-1,3,2-dioxaborolan-2-yl)nonylidene)indolin-2-one (2g):**

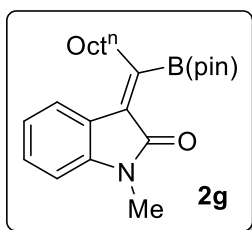

Synthesized using general procedure **2a**, purified by silica gel column chromatography (25% EtOAc/hexane), yellow gummy compound, yield (56 mg) 70%.  $^1\text{H}$  NMR (400 MHz,  $\text{CDCl}_3$ )  $\delta$  ppm 7.54 (d,  $J = 7.56$  Hz, 1H), 7.26-7.22 (m, 1H), 7.01 (t,  $J = 7.56$  Hz, 1H), 6.79 (d,  $J = 7.76$  Hz, 1H), 3.20 (s, 3H), 2.72 (t,  $J = 7.72$  Hz, 2H), 1.69-1.63 (m, 2H), 1.42 (s, 12H), 1.34-1.22(m, 12H), 0.89-0.86 (m, 3H);  $^{13}\text{C}$  NMR (101 MHz,  $\text{CDCl}_3$ )  $\delta$  168.90, 144.54, 131.87, 128.66, 123.78, 122.50, 122.15, 108.16, 84.15, 32.31, 31.98, 30.19, 29.51, 29.30, 27.95, 26.18, 25.13, 22.80, 14.24. HRMS (ESI):  $m/z$  calculated for  $[\text{C}_{24}\text{H}_{36}\text{BNO}_3 + \text{H}]^+$  398.2861, found: 398.2877.  $^{11}\text{B}$  NMR (160 MHz,  $\text{CDCl}_3$ )  $\delta$  30.99.

**(E)-1-methyl-3-(1-(4,4,5,5-tetramethyl-1,3,2-dioxaborolan-2-yl)ethylidene)indolin-2-one (2h):**

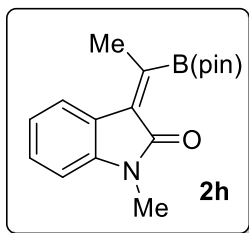

Synthesized using general procedure **2a**, purified by silica gel flash column chromatography (25% EtOAc/hexane), yellow gummy compound, yield (38 mg) 63%. <sup>1</sup>H NMR (400 MHz, CDCl<sub>3</sub>) δ ppm 7.57 (d, *J* = 7.56 Hz, 1H), 7.27-7.26 (m, 1H), 7.03 (t, *J* = 7.56 Hz, 1H), 6.80 (d, *J* = 7.84, 1H), 3.21 (s, 3H), 2.32 (s, 3H), 1.42 (m, 12H). <sup>13</sup>C NMR (126 MHz, CDCl<sub>3</sub>) δ 168.74, 144.63, 132.61, 128.76, 123.97, 122.95, 122.18, 108.15, 84.22, 26.18, 24.99, 17.85. HRMS (ESI): *m/z* calculated for [C<sub>17</sub>H<sub>22</sub>BNO<sub>3</sub>+ H]<sup>+</sup> 300.1766, found: 300.1768.

**(E)-3-(cyclopropyl(4,4,5,5-tetramethyl-1,3,2-dioxaborolan-2-yl)methylene)-1-methylindolin-2-one (2i):**

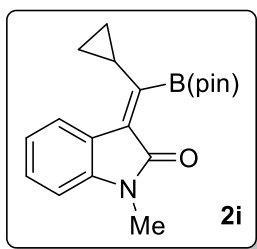

Synthesized using general procedure **2a**, purified by silica gel flash column chromatography (25% EtOAc/hexane), yellow gummy compound, yield (48 mg) 74%. <sup>1</sup>H NMR (400 MHz, CDCl<sub>3</sub>) δ ppm 7.72 (d, *J* = 7.0 Hz, 1H), 7.27-7.22 (m, 1H), 7.01 (t, *J* = 7.4 Hz, 1H), 6.80 (d, *J* = 7.72 Hz, 1H), 3.21 (s, 1H), 2.42-2.39 (m, 1H), 1.41 (s, 12H), 1.12-1.04 (m, 4H), <sup>13</sup>C NMR (101 MHz, CDCl<sub>3</sub>) δ 168.76, 144.17, 131.76, 128.30, 123.38, 122.96, 121.98, 108.07, 84.40, 26.18, 25.49, 15.45, 8.91. HRMS (ESI): *m/z* calculated for [C<sub>19</sub>H<sub>24</sub>BNO<sub>3</sub>+ H]<sup>+</sup> 326.1922, found: 326.1922. <sup>11</sup>B NMR (160 MHz, CDCl<sub>3</sub>) δ 30.84.

**(E)-3-(cyclopentyl(4,4,5,5-tetramethyl-1,3,2-dioxaborolan-2-yl)methylene)-1-methylindolin-2-one (2j):**

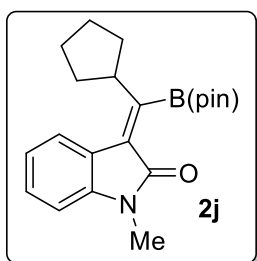

Synthesized using general procedure **2a**, purified by silica gel flash column chromatography (25% EtOAc/hexane), yellow gummy compound, yield (46 mg) 65%. <sup>1</sup>H NMR (400 MHz, CDCl<sub>3</sub>) δ ppm 7.58 (d, *J* = 7.48 Hz, 1H), 7.24-7.20 (m, 1H), 6.99 (t, *J* = 7.6 Hz, 1H), 6.78 (d, *J* = 7.76 Hz, 1H), 3.59-3.51 (m, 1H), 3.19 (s, 3H), 2.06-1.98 (m, 2H), 1.74-1.64 (m, 6H) 1.43 (s, 12H); <sup>13</sup>C NMR (101 MHz, CDCl<sub>3</sub>) δ 168.90, 144.46, 131.50, 128.51, 123.86, 122.58, 122.04, 108.07, 84.21, 42.89, 31.84, 26.13, 25.81, 25.61. HRMS (ESI): *m/z* calculated for [C<sub>21</sub>H<sub>28</sub>BNO<sub>3</sub>+ H]<sup>+</sup> 354.2235, found: 354.2235. <sup>11</sup>B NMR (160 MHz, CDCl<sub>3</sub>) δ 30.80.

**(E)-3-(cyclohexyl(4,4,5,5-tetramethyl-1,3,2-dioxaborolan-2-yl)methylene)-1-methylindolin-2-one (2k):**

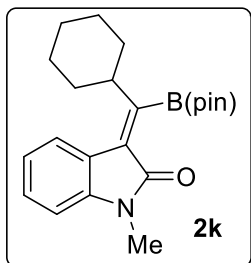

Synthesized using general procedure **2a**, purified by silica gel flash column chromatography (25% EtOAc/hexane), yellow gummy compound, yield (45 mg) 62%. <sup>1</sup>H NMR (400 MHz, CDCl<sub>3</sub>) δ ppm 7.52 (d, *J* = 7.64 Hz, 1H), 7.20 (d, *J* = 7.96 Hz, 1H), 7.01 (t, *J* = 7.6 Hz, 1H), 6.78 (d, *J* = 7.84 Hz, 1H), 3.19 (s, 3H), 3.12-3.08 (m, 1H), 1.91-1.84 (m, 4H), 1.77 (d, *J* = 12.8 Hz, 1H), 1.44 (s, 12H), 1.29-1.24 (m, 4H); <sup>13</sup>C NMR (101 MHz, CDCl<sub>3</sub>) δ 169.08, 144.57, 130.95, 128.60, 123.97, 122.33, 122.12, 108.12, 84.23, 41.73, 31.49, 26.52, 26.16, 26.13, 25.63. HRMS (ESI): *m/z* calculated for [C<sub>22</sub>H<sub>30</sub>BNO<sub>3</sub>+ H]<sup>+</sup> 368.2392, found: 368.2390.

**(E)-1-methyl-3-(2-phenyl-1-(4,4,5,5-tetramethyl-1,3,2-dioxaborolan-2-yl)ethylidene)indolin-2-one (2l):**

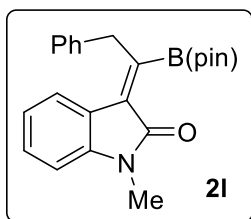

Synthesized using general procedure **2a**, purified by silica gel flash column chromatography (25% EtOAc/hexane), yellow gummy compound, yield (52 mg) 70%. <sup>1</sup>H NMR (500 MHz, CDCl<sub>3</sub>) δ ppm 7.58 (d, *J* = 7.55 Hz, 1H), 7.32-7.27 (m, 4H), 7.24-7.19 (m, 2H), 6.98 (td, *J* = 7.65 Hz, *J* = 1.05 Hz, 1H), 6.81 (d, *J* = 7.85 Hz, 1H), 4.13 (s, 2H) 3.22 (s, 3H), 1.18 (s, 12H); <sup>13</sup>C NMR (126 MHz, CDCl<sub>3</sub>) δ 168.72, 144.86, 137.66, 132.97, 129.70, 129.17, 128.59, 126.80, 124.02, 122.54, 122.26, 108.24, 84.14, 38.32, 26.22, 25.03. HRMS (ESI): *m/z* calculated for [C<sub>23</sub>H<sub>26</sub>BNO<sub>3</sub>+ H]<sup>+</sup> 376.2079, found: 376.2077.

**(E)-1-methyl-3-(3-phenyl-1-(4,4,5,5-tetramethyl-1,3,2-dioxaborolan-2-yl)propylidene)indolin-2-one (2m):**

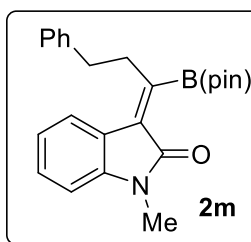

Synthesized using general procedure **2a**, purified by silica gel flash column chromatography (25% EtOAc/hexane), yellow gummy compound, yield (57 mg) 73%. <sup>1</sup>H NMR (500 MHz, CDCl<sub>3</sub>) δ ppm 7.51 (d, *J* = 7.35 Hz, 1H), 7.33-7.26 (m, 4H), 7.23-7.18 (m, 2H), 6.98 (td, *J* = 7.65 Hz, *J* = 1.05 Hz, 1H), 6.78 (d, *J* = 7.8 Hz, 1H), 3.19 (s, 3H), 3.04-3.00 (m, 2H), 2.97-2.93 (m, 2H), 1.44 (s, 12H); <sup>13</sup>C NMR (126 MHz, CDCl<sub>3</sub>) δ 168.81, 144.62, 141.49, 132.33, 128.88, 128.67, 128.45, 128.33, 126.30, 123.67, 122.20,

108.19, 84.24, 34.29, 33.93, 26.14, 25.12. HRMS (ESI):  $m/z$  calculated for  $[C_{24}H_{28}BNO_3 + H]^+$  390.2235, found: 390.2245.  $^{11}B$  NMR (160 MHz,  $CDCl_3$ )  $\delta$  30.53.

**(E)-4-chloro-1-methyl-3-(2-methyl-1-(4,4,5,5-tetramethyl-1,3,2-dioxaborolan-2-yl)propylidene)indolin-2-one (2n):**

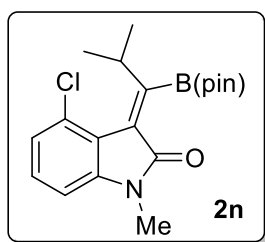

Synthesized using general procedure **2a**, purified by silica gel flash column chromatography (25% EtOAc/hexane), yellow solid compound, yield (42 mg) 58%.  $^1H$  NMR (400 MHz,  $CDCl_3$ )  $\delta$  7.15 (t,  $J = 8.0$  Hz, 1H), 7.01 (d,  $J = 8.2$  Hz, 1H), 6.68 (d,  $J = 7.8$  Hz, 1H), 4.15 – 4.07 (m, 1H), 3.19 (s, 1H), 1.43 (s, 7H), 1.24 (d,  $J = 6.8$  Hz, 6H).  $^{13}C$  NMR (101 MHz,  $CDCl_3$ )  $\delta$  169.86, 146.82, 129.63, 128.93, 128.84, 124.94, 121.02, 106.69, 83.93, 33.16, 26.65, 25.84, 22.22. HRMS (ESI):  $m/z$  calculated for  $[C_{19}H_{25}BClNO_3 + H]^+$  362.1689, found: 362.1694.

**(E)-5-fluoro-1-methyl-3-(2-methyl-1-(4,4,5,5-tetramethyl-1,3,2-dioxaborolan-2-yl)propylidene)indolin-2-one (2o):**

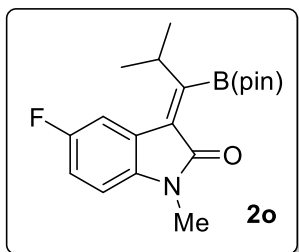

Synthesized using general procedure **2a**, purified by silica gel flash column chromatography (25% EtOAc/hexane), yellow solid compound, yield (49 mg) 71%.  $^1H$  NMR (400 MHz,  $CDCl_3$ )  $\delta$  ppm 7.33-7.29 (m, 1H), 6.98-6.92 (m, 1H), 6.71-6.67 (m, 1H) 3.46-3.38 (m, 1H), 3.19-3.17 (m, 3H), 1.45-1.44 (m, 12H), 1.29-1.26 (m, 6H).  $^{13}C$  NMR (101 MHz,  $CDCl_3$ )  $\delta$  168.90, 160.12, 157.76, 140.62, 130.34, 123.05 (d,  $J = 34.48$  Hz), 114.65 (d,  $J = 94.8$ Hz), 111.95 (d,  $J = 102.96$ ), 108.33 (d,  $J = 33.38$  Hz) 84.42, 31.13, 26.29, 25.60, 21.46. HRMS (ESI):  $m/z$  calculated for  $[C_{19}H_{25}BFNO_3 + H]^+$  346.1984, found: 346.1990.

**(E)-1,5-dimethyl-3-(2-methyl-1-(4,4,5,5-tetramethyl-1,3,2-dioxaborolan-2-yl)propylidene)indolin-2-one (2p):**

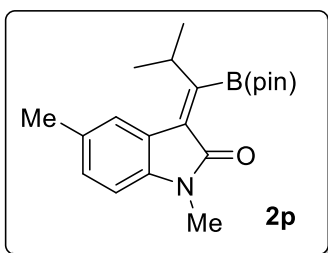

Synthesized using general procedure **2a**, purified by silica gel flash column chromatography (25% EtOAc/hexane), yellow solid compound, yield (42 mg) 62%.  $^1\text{H}$  NMR (400 MHz,  $\text{CDCl}_3$ )  $\delta$  7.38 (s, 1H), 7.03 (d,  $J = 7.9$  Hz, 1H), 6.66 (d,  $J = 7.8$  Hz, 1H), 3.51 (hept,  $J = 7.0$  Hz, 1H), 3.16 (s, 3H), 2.34 (s, 3H), 1.44 (s, 12H), 1.27 (d,  $J = 7.0$  Hz, 6H).  $^{13}\text{C}$  NMR (101 MHz,  $\text{CDCl}_3$ )  $\delta$  169.10, 142.39, 131.30, 130.86, 128.92, 124.94, 122.29, 107.79, 84.18, 30.97, 26.17, 25.60, 21.53, 21.44. HRMS (ESI):  $m/z$  calculated for  $[\text{C}_{20}\text{H}_{28}\text{BNO}_3 + \text{H}]^+$  342.2235, found: 342.2239.  $^{11}\text{B}$  NMR (160 MHz,  $\text{CDCl}_3$ )  $\delta$  30.69.

**(E)-5-methoxy-1-methyl-3-(2-methyl-1-(4,4,5,5-tetramethyl-1,3,2-dioxaborolan-2-yl)propylidene)indolin-2-one (2q):**

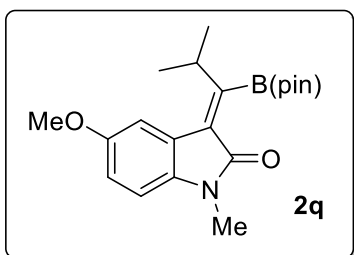

Synthesized using general procedure **2a**, purified by silica gel flash column chromatography (25% EtOAc/hexane), yellow solid, yield (48 mg) 67%.  $^1\text{H}$  NMR (400 MHz,  $\text{CDCl}_3$ )  $\delta$  ppm 7.19 (s, 1H), 6.78-6.76 (m, 1H), 6.67 (d,  $J = 8.08$  Hz, 1H), 3.79 (s, 3H), 3.45 (h,  $J = 6.9$  Hz, 1H), 3.16 (s, 3H), 1.4 (s, 12H) 1.26 (d,  $J = 6.88$  Hz, 6H);  $^{13}\text{C}$  NMR (101 MHz,  $\text{CDCl}_3$ )  $\delta$  ppm 168.94, 155.47, 138.59, 130.94, 123.19, 112.35, 112.21, 108.00, 84.25, 56.02, 31.00, 26.23, 25.61, 21.49. HRMS (ESI):  $m/z$  calculated for  $[\text{C}_{20}\text{H}_{28}\text{BNO}_4 + \text{H}]^+$  358.2184, found: 358.2194.

**(E)-6-chloro-1-methyl-3-(2-methyl-1-(4,4,5,5-tetramethyl-1,3,2-dioxaborolan-2-yl)propylidene)indolin-2-one (2r):**

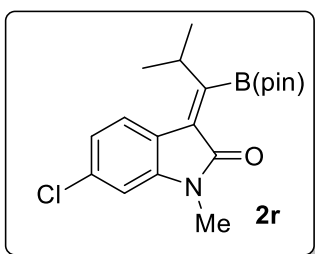

Synthesized using general procedure **2a**, purified by silica gel flash column chromatography (25% EtOAc/hexane), yellow solid, yield (47 mg) 65%.  $^1\text{H}$  NMR (400 MHz,  $\text{CDCl}_3$ )  $\delta$  ppm 7.47 (d,  $J = 8.12$  Hz, 1H) 6.97 (d,  $J = 6.7$  Hz, 1H), 6.77 (s, 1H) 3.43 (p,  $J = 7.0$  Hz, 1H), 3.17 (s, 3H), 1.43 (s, 12H), 1.25 (d,  $J = 8$  Hz, 6H).  $^{13}\text{C}$  NMR (101 MHz,  $\text{CDCl}_3$ )  $\delta$  169.03, 145.65, 134.42, 129.75, 124.85, 121.94, 120.67, 108.85, 84.40, 31.20, 26.27, 25.59, 21.45. HRMS (ESI):  $m/z$  calculated for  $[\text{C}_{19}\text{H}_{25}\text{BClNO}_3 + \text{H}]^+$  362.1689, found: 362.1694.  $^{11}\text{B}$  NMR (160 MHz,  $\text{CDCl}_3$ )  $\delta$  30.64.

**(E)-1,7-dimethyl-3-(2-methyl-1-(4,4,5,5-tetramethyl-1,3,2-dioxaborolan-2-yl)propylidene)indolin-2-one (2s):**

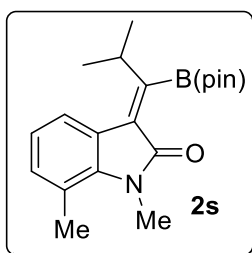

Synthesized using general procedure **2a**, purified by silica gel flash column chromatography (25% EtOAc/hexane), yellow solid, yield (46 mg) 67%. <sup>1</sup>H NMR (400 MHz, CDCl<sub>3</sub>) δ ppm 7.44 (d, *J* = 7.52 Hz, 1H) 6.96 (d, *J* = 7.72 Hz, 1H), 6.90-6.86 (m, 1H) 3.52-3.45 (m, 4H), 2.54 (s, 3H), 1.43 (s, 12H), 1.26-1.24 (m, 6H). <sup>13</sup>C NMR (101 MHz, CDCl<sub>3</sub>) δ 169.95, 142.49, 132.49, 130.44, 122.89, 122.22, 121.98, 119.71, 84.14, 30.78, 29.81, 25.62, 21.47, 19.41. HRMS (ESI): *m/z* calculated for [C<sub>20</sub>H<sub>28</sub>BNO<sub>3</sub>+ H]<sup>+</sup> 342.2235, found: 342.2243.

**(E)-1-methyl-3-(phenyl(4,4,5,5-tetramethyl-1,3,2-dioxaborolan-2-yl)methylene)indolin-2-one (2t):**

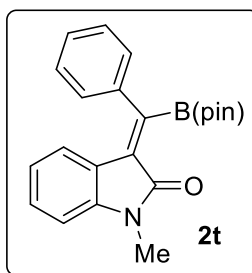

Synthesized using general procedure **2a**, purified by silica gel flash column chromatography (25% EtOAc/hexane), yellow gummy compound, yield (42 mg) 58%. <sup>1</sup>H NMR (400 MHz, CDCl<sub>3</sub>) δ ppm 7.49-7.36 (m, 5H), 7.18 (t, *J* = 7.72 Hz, 1H) 6.98 (d, *J* = 7.76 Hz, 1H), 6.78-6.72 (m, 2H), 3.24 (s, 3H), 1.37 (s, 12H); <sup>13</sup>C NMR (101 MHz, CDCl<sub>3</sub>) δ 169.24, 145.02, 138.12, 132.42, 129.58, 128.86, 128.40, 127.59, 123.32, 121.95, 121.55, 108.23, 84.42, 26.31, 24.94. HRMS (ESI): *m/z* calculated for [C<sub>22</sub>H<sub>24</sub>BNO<sub>3</sub>+ H]<sup>+</sup> 362.1922, found: 362.1924. <sup>11</sup>B NMR (160 MHz, CDCl<sub>3</sub>) δ 30.74.

**(E)-1-methyl-3-((4,4,5,5-tetramethyl-1,3,2-dioxaborolan-2-yl)(p-tolyl)methylene)indolin-2-one (2u):**

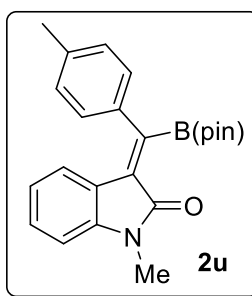

Synthesized using general procedure **2a**, purified by silica gel flash column chromatography (25% EtOAc/hexane), yellow gummy compound, yield (44 mg) 59%. <sup>1</sup>H NMR (400 MHz, CDCl<sub>3</sub>) δ ppm 7.39-7.36 (m, 2H), 7.24-7.16 (m, 3H) 7.12-7.08 (m, 1H), 6.77-6.73 (m, 2H), 3.24 (s, 3H), 2.41 (s, 3H), 1.37 (s, 12H); <sup>13</sup>C NMR (101 MHz, CDCl<sub>3</sub>) δ 169.34, 144.94, 138.43, 135.00, 131.97, 129.53, 129.41, 127.69, 123.24, 121.87, 121.67, 108.18, 84.34, 26.29, 24.97, 21.55. HRMS (ESI): *m/z* calculated for [C<sub>23</sub>H<sub>26</sub>BNO<sub>3</sub>+ H]<sup>+</sup> 376.2079, found: 376.2081. <sup>11</sup>B NMR (160 MHz, CDCl<sub>3</sub>) δ 30.91.

## 2b. Optimization of Boron-Wittig reaction between $\alpha$ -boryl carbanion and 1,2-diketones and $\alpha$ -keto-ester/amide:

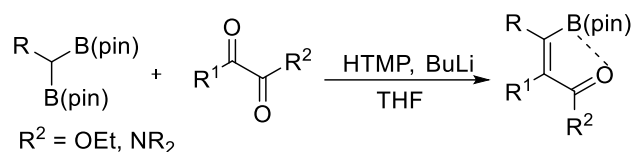

**Table 1. Optimization of Reaction Condition<sup>a</sup>**

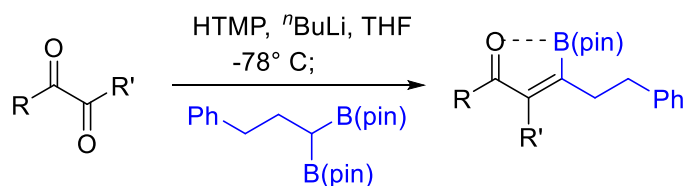

| Entry          | R                                  | R'              | Reaction condition | Yield(%) <sup>b</sup> |
|----------------|------------------------------------|-----------------|--------------------|-----------------------|
| 1              | Ph                                 | Ph              | A                  | nd <sup>d</sup>       |
| 2              | Ph                                 | Ph              | C                  | nd <sup>d</sup>       |
| 3 <sup>c</sup> | Ph                                 | Ph              | C                  | nd <sup>d</sup>       |
| 4              | Ph                                 | Ph              | B                  | nd <sup>d</sup>       |
| 5              | 4-OMeC <sub>6</sub> H <sub>4</sub> | OEt             | A                  | 60                    |
| 6              | 4-OMeC <sub>6</sub> H <sub>4</sub> | OEt             | B                  | 72                    |
| 7 <sup>c</sup> | 4-OMeC <sub>6</sub> H <sub>4</sub> | OEt             | B                  | 55                    |
| 8              | 4-OMeC <sub>6</sub> H <sub>4</sub> | OEt             | C                  | 45                    |
| 9              | Ph                                 | NR <sub>2</sub> | A                  | 65                    |
| 10             | Ph                                 | NR <sub>2</sub> | B                  | 69                    |
| 11             | Ph                                 | NR <sub>2</sub> | C                  | 50                    |

<sup>a</sup>Condition: The LTMP solution of geminal bis boronate was generated in situ using HTMP/<sup>n</sup>BuLi at 0 °C, which was slowly added to the THF solution of 1,2-diketo compounds at -78 °C, HTMP (1.2 equiv.), <sup>n</sup>BuLi (1.2 equiv.); geminal-B(pin) (1.2 equiv.) at 0 °C then added Di-keto (1 equiv.) and stirred at below condition; <sup>b</sup> Isolated yield; <sup>c</sup> Di-keto (1 equiv.), HTMP (2 equiv.); <sup>n</sup>BuLi (2 equiv.); geminal-B(pin) (2 equiv.); **Condition A** : the lithiated geminal B(pin) was added to the keto at -78 °C then stirred at RT for 1 h; **Condition B**: the lithiated geminal B(pin) was added to the keto at -78 °C then stirred at 0 °C for 1h; C: added at -78 °C and stirred for 1h at -78 °C; <sup>d</sup>multiple inseparable spots.

### 2b.1. General procedure for the Boron-Wittig reaction with $\alpha$ -keto-ester/amide:

To a flame-dried reaction tube, 2,2,6,6-Tetramethylpiperidine (HTMP) (0.24 mmol, 1.2 equiv) in dry THF (1 mL) at -78 °C was added n-BuLi (1.2 equiv) drop-wise for 5 min under argon

atmosphere. The reaction mixture was stirred for 30 min at the same temperature. The reaction was then cooled to 0 °C and stirred for another 30 min. Geminal-bis boronates (0.24 mmol, 1.2 equiv) were dissolved in dry THF (1 ml) added to the reaction mixture and stirred for 5 min. Then the reaction mixture was transferred to a solution of  $\alpha$ -keto ester (0.2 mmol) in THF at -78 °C and further stirred for 1h at 0 °C. In the case of keto-amide, the reaction is stirred for 2h at 0 °C. After completion of the reaction 1ml water was added and the product was extracted with EtOAc (3  $\times$  5 mL). The organic layer was dried over Na<sub>2</sub>SO<sub>4</sub> and concentrated in a vacuum to afford the crude product. This crude material was further purified by flash column chromatography. We are unable to detect the minor diastereoisomer from the crude reaction mixture.

**Ethyl (E)-2-(4-methoxyphenyl)-5-phenyl-3-(4,4,5,5-tetramethyl-1,3,2-dioxaborolan-2-yl)pent-2-enoate (3a):**

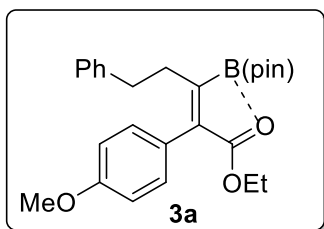

Synthesized using general procedure **2b.1**, purified by silica gel flash column chromatography (5% EtOAc/hexane), colorless oil, yield (63 mg) 72%. <sup>1</sup>H NMR (400 MHz, CDCl<sub>3</sub>)  $\delta$  7.24 – 7.20 (m, 2H), 7.14 (td,  $J$  = 5.3, 4.9, 2.5 Hz, 1H), 7.06 – 7.04 (m, 2H), 6.91–6.81 (m, 4H), 4.23 (q,  $J$  = 7.1 Hz, 2H), 3.81 (s, 3H), 2.78 – 2.73 (m, 2H), 2.45 – 2.41 (m, 2H), 1.44 (s, 12H), 1.19 (t,  $J$  = 7.1 Hz, 3H). <sup>13</sup>C NMR (126 MHz, CDCl<sub>3</sub>)  $\delta$  171.00, 158.90, 141.90, 137.99, 130.71, 128.51, 128.45, 127.49, 125.99, 113.52, 83.57, 62.28, 55.31, 34.65, 30.73, 25.27, 14.27. HRMS (ESI):  $m/z$  calculated for [C<sub>26</sub>H<sub>33</sub>BO<sub>5</sub>+ H]<sup>+</sup> 437.2494 found: 437.2497. <sup>11</sup>B NMR (160 MHz, CDCl<sub>3</sub>)  $\delta$  28.33.

**Ethyl (E)-4-methyl-2-phenyl-3-(4,4,5,5-tetramethyl-1,3,2-dioxaborolan-2-yl)pent-2-enoate (3b):**

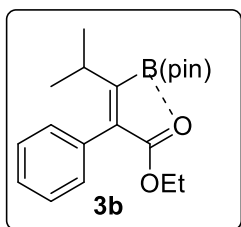

Synthesized using general procedure **2b.1**, purified by silica gel flash column chromatography (5% EtOAc/hexane), colorless oil, yield (47 mg) 69%. <sup>1</sup>H NMR (400 MHz, CDCl<sub>3</sub>)  $\delta$  7.34-7.29(m, 3H), 7.13-7.09 (m, 2H), 2.56-2.49 (m 1H), 1.41 (s, 12H), 1.16-1.12(m,3H), 1.05-1.03(m, 6H). <sup>13</sup>C NMR (101 MHz, CDCl<sub>3</sub>)  $\delta$  169.96, 136.61, 136.29, 129.53, 127.97, 127.15, 83.72, 77.48, 76.85, 61.77, 31.82, 25.54, 21.71, 14.23. HRMS (ESI):  $m/z$  calculated for [C<sub>20</sub>H<sub>29</sub>BO<sub>4</sub>+ H]<sup>+</sup> 345.2232 found: 345.2249.



**Ethyl (E)-2-(4-methoxyphenyl)-4-methyl-3-(4,4,5,5-tetramethyl-1,3,2-dioxaborolan-2-yl)pent-2-enoate (3c):**

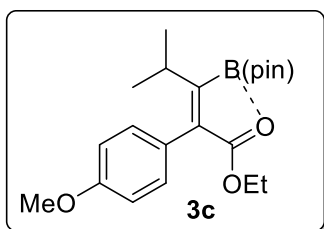

Synthesized using general procedure **2b.1**, purified by silica gel flash column chromatography (5% EtOAc/hexane), colorless oil, yield (55 mg) 74%.  $^1\text{H NMR}$  (400 MHz,  $\text{CDCl}_3$ )  $\delta$  7.03 (d,  $J = 8.5$  Hz, 2H), 6.87 (d,  $J = 8.5$  Hz, 2H), 4.19 – 4.12 (m, 2H), 3.81 (s, 3H), 2.57 (p,  $J = 7.0$  Hz, 1H), 1.40 (s, 12H), 1.15 (t,  $J = 7.1$  Hz,

3H), 1.03 (d,  $J = 6.9$  Hz, 6H).  $^{13}\text{C NMR}$  (126 MHz,  $\text{CDCl}_3$ )  $\delta$  170.31, 158.76, 136.27, 130.70, 128.54, 113.47, 83.66, 61.75, 55.26, 31.81, 25.57, 21.73, 14.27. HRMS (ESI):  $m/z$  calculated for  $[\text{C}_{21}\text{H}_{23}\text{BO}_5 + \text{H}]^+$  375.2337 found: 375.2367.

**Ethyl (E)-3-cyclohexyl-2-(4-methoxyphenyl)-3-(4,4,5,5-tetramethyl-1,3,2-dioxaborolan-2-yl)acrylate (3d):**

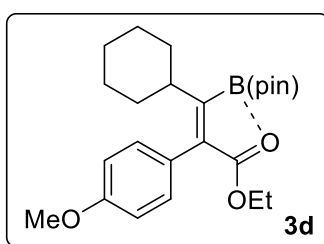

Synthesized using general procedure **2b.1**, purified by silica gel flash column chromatography (5% EtOAc/hexane), colorless oil, yield (65 mg) 78%.  $^1\text{H NMR}$  (400 MHz,  $\text{CDCl}_3$ )  $\delta$  7.02 (d,  $J = 7.5$  Hz, 2H), 6.86 (d,  $J = 8.0$  Hz, 2H), 4.16 (q,  $J = 7.3$  Hz, 2H), 3.82 (s, 3H), 2.23 (tt,  $J = 12.1, 3.5$  Hz, 1H), 1.67-1.64 (m, 2H), 1.57-

1.54 (m, 3H), 1.41 (s, 12H), 1.27-1.21(m, 2H), 1.15 (t,  $J = 7.1$  Hz, 3H), 1.06 – 1.01 (m, 3H).  $^{13}\text{C NMR}$  (101 MHz,  $\text{CDCl}_3$ )  $\delta$  170.50, 158.66, 136.50, 130.70, 128.49, 113.41, 83.61, 61.82, 55.27, 42.47, 31.51, 26.18, 26.09, 25.60, 14.30. HRMS (ESI):  $m/z$  calculated for  $[\text{C}_{24}\text{H}_{35}\text{BO}_5 + \text{H}]^+$  415.2650 found: 415.2676.

**Ethyl (E)-3-cyclopropyl-2-(4-methoxyphenyl)-3-(4,4,5,5-tetramethyl-1,3,2-dioxaborolan-2-yl)acrylate (3e):**

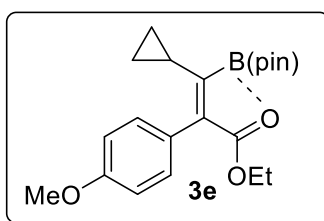

Synthesized using general procedure **2b.1**, purified by silica gel flash column chromatography (5% EtOAc/hexane), colorless oily compound, yield (53 mg) 71%.  $^1\text{H NMR}$  (400 MHz,  $\text{CDCl}_3$ )  $\delta$  7.18 (d,  $J = 8.64$  Hz, 2H), 6.89 (d,  $J = 8.64$  Hz, 2H), 4.22 (q,  $J = 7.1$  Hz, 2H), 3.81 (s, 1H), 1.66 – 1.59 (m, 1H), 1.36 (s, 12H), 1.19 (t,

$J = 7.08$  Hz, 3H), 1.07 – 1.03 (m, 2H), 0.79 – 0.74 (m, 2H).  $^{13}\text{C NMR}$  (126 MHz,  $\text{CDCl}_3$ )  $\delta$  171.30, 158.79, 135.57, 131.47, 127.97, 113.50, 83.48, 62.22, 55.30, 25.70, 16.15, 14.31, 8.55. HRMS (ESI):  $m/z$  calculated for  $[\text{C}_{21}\text{H}_{29}\text{BO}_5 + \text{H}]^+$  373.2181. found: 373.2185.

**Ethyl-(*E*)-2-(4-chlorophenyl)-3-cyclopropyl-3-(4,4,5,5-tetramethyl-1,3,2-dioxaborolan-2-yl)acrylate (3f):**

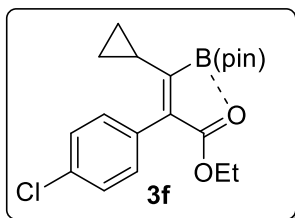

Synthesized using general procedure **2b.1**, purified by silica gel flash column chromatography (5% EtOAc/hexane), white solid, yield (56 mg) 75%. <sup>1</sup>H NMR (500 MHz, CDCl<sub>3</sub>) δ ppm 7.31 (d, *J* = 8.25 Hz, 2H), 7.17 (d, *J* = 8.15 Hz, 2H), 4.20 (q, *J* = 7.1 Hz, 2H) 1.53 (tt, *J* = 8.5Hz, 4.8 Hz, 1H), 1.36 (s, 12H), 1.18 (t, *J* = 7.1 Hz, 3H), 1.04 (dt, *J* = 6.7Hz, 3.4 Hz, 2H) 0.79-0.75 (m, 2H); <sup>13</sup>C NMR (126 MHz, CDCl<sub>3</sub>) δ 170.23, 134.96, 134.35, 133.17, 131.69, 128.30, 83.74, 62.17, 25.64, 16.15, 14.25, 8.68. HRMS (ESI): *m/z* calculated for [C<sub>20</sub>H<sub>26</sub>BClO<sub>4</sub>+ H]<sup>+</sup> 377.1685 found: 377.1689. <sup>11</sup>B NMR (160 MHz, CDCl<sub>3</sub>) δ 28.42.

**Ethyl (*E*)-2-(4-chlorophenyl)-3-cyclohexyl-3-(4,4,5,5-tetramethyl-1,3,2-dioxaborolan-2-yl)acrylate (3g):**

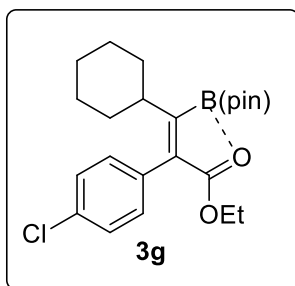

Synthesized using general procedure **2b.1**, purified by silica gel flash column chromatography (5% EtOAc/hexane), white solid, yield (60 mg) 72%. <sup>1</sup>H NMR (400 MHz, CDCl<sub>3</sub>) δ 7.31 (dt, *J* = 6.6, 2.3 Hz, 2H), 7.04 (d, *J* = 8.5 Hz, 2H), 4.15 (q, *J* = 6.9 Hz, 1H), 2.19-2.11(m, 1H), 1.68-1.53(m, 7H), 1.42(s, 12H), 1.14 (t, *J* = 7.1 Hz, 3H), 1.07-0.97 (m, 3H). <sup>13</sup>C NMR (101 MHz, CDCl<sub>3</sub>) δ 169.57, 135.79, 134.80, 133.10, 130.92, 128.28, 83.81, 61.85, 42.60, 31.44, 30.68, 25.98, 25.56, 14.23. HRMS (ESI): *m/z* calculated for [C<sub>23</sub>H<sub>32</sub>BClO<sub>4</sub>+ H]<sup>+</sup> 419.2155 found: 419.2160. <sup>11</sup>B NMR (160 MHz, CDCl<sub>3</sub>) δ 12.04.

**(*E*)-2,5-diphenyl-1-(pyrrolidin-1-yl)-3-(4,4,5,5-tetramethyl-1,3,2-dioxaborolan-2-yl)pent-2-en-1-one (3h):**

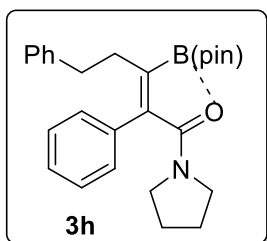

Synthesized using general procedure **2b.1**, purified by silica gel flash column chromatography (35% EtOAc/hexane), white solid compound, yield (58 mg) 69%. <sup>1</sup>H NMR (400 MHz, CDCl<sub>3</sub>) δ ppm 7.28-7.23 (m, 3H), 7.19-7.09 (m, 3H), 7.05-6.99 (m, 2H), 6.87-6.82 (m, 2H), 3.75-3.71 (m, 2H), 2.84-2.74 (m, 4H) 2.43-2.38 (m, 2H), 1.75-1.63 (m, 4H), 1.33 (s, 12H); <sup>13</sup>C NMR (101 MHz, CDCl<sub>3</sub>) δ 170.77, 142.69, 135.45, 133.88, 129.75, 128.64,

128.57, 128.26, 127.72, 125.60, 80.24, 49.59, 48.86, 34.40, 32.59, 26.37, 25.75, 23.42. HRMS (ESI):  $m/z$  calculated for  $[C_{27}H_{34}BNO_3 + H]^+$  432.2705, found: 432.2711.  $^{11}B$  NMR (160 MHz,  $CDCl_3$ )  $\delta$  11.99.

**(E)-2-phenyl-1-(pyrrolidin-1-yl)-3-(4,4,5,5-tetramethyl-1,3,2-dioxaborolan-2-yl)but-2-en-1-one (3i):**

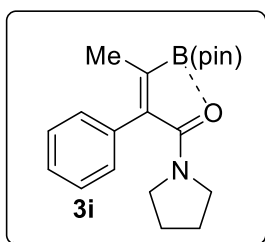

Synthesized using general procedure **2b.1**, purified by silica gel column chromatography (35% EtOAc/hexane), colorless liquid compound, yield (46 mg) 67%.  $^1H$  NMR (400 MHz,  $CDCl_3$ )  $\delta$  ppm 7.35-7.29 (m, 3H), 7.08-7.06 (m, 2H), 3.75 (t,  $J = 6.76$ Hz, 2H), 2.84 (t,  $J = 6.76$ Hz, 2H), 1.78 (s, 3H), 1.76-1.67 (m, 4H), 1.26 (s, 12H);  $^{13}C$  NMR (101 MHz,  $CDCl_3$ )  $\delta$  170.97, 135.81, 133.13, 129.84, 128.69, 127.71, 80.07, 49.51, 49.06, 26.40, 25.56, 23.46, 15.91. HRMS (ESI):  $m/z$  calculated for  $[C_{20}H_{28}BNO_3 + H]^+$  342.2235, found: 342.2245.  $^{11}B$  NMR (160 MHz,  $CDCl_3$ )  $\delta$  12.45.

**(E)-4-methyl-2-phenyl-1-(pyrrolidin-1-yl)-3-(4,4,5,5-tetramethyl-1,3,2-dioxaborolan-2-yl)pent-2-en-1-one (3j):**

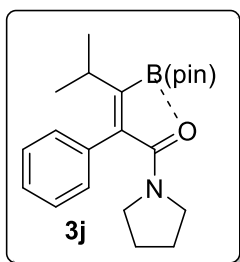

Synthesized using general procedure **2b.1**, purified by silica gel column chromatography (35% EtOAc/hexane), white solid compound, yield (51 mg) 69%.  $^1H$  NMR (400 MHz,  $CDCl_3$ )  $\delta$  ppm 7.35-7.32 (m, 3H), 7.12-7.08 (m, 2H), 3.72-3.68 (m, 2H), 2.78-2.74 (m, 2H), 2.55-2.49 (m, 1H), 1.74-1.67 (m, 4H), 1.31 (s, 12H), 1.11-1.08 (m, 6H);  $^{13}C$  NMR (101 MHz,  $CDCl_3$ )  $\delta$  170.53, 136.52, 132.20, 130.04, 128.62, 127.73, 80.27, 49.54, 48.57, 31.28, 26.50, 26.35, 24.97, 23.38, 21.25. HRMS (ESI):  $m/z$  calculated for  $[C_{22}H_{32}BNO_3 + H]^+$  370.2548, found: 370.2533.

**(E)-6-methyl-2-phenyl-1-(pyrrolidin-1-yl)-3-(4,4,5,5-tetramethyl-1,3,2-dioxaborolan-2-yl)hept-2-en-1-one (3k):**

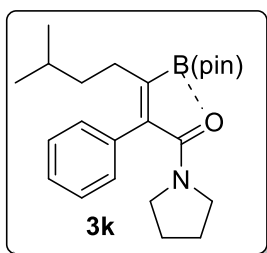

Synthesized using general procedure **2b.1**, purified by silica gel flash column chromatography (35% EtOAc/hexane), white solid compound, yield (62 mg) 78%.  $^1\text{H}$  NMR (400 MHz,  $\text{CDCl}_3$ )  $\delta$  ppm 7.35-7.29 (m, 3H), 7.09-7.07 (m, 2H), 3.73 (t,  $J = 7.16\text{Hz}$ , 2H), 2.81 (t,  $J = 6.8\text{Hz}$ , 2H), 2.11 (t,  $J = 8.52\text{ Hz}$ , 2H), 1.79-1.71(m, 4H), 1.43-1.34 (m, 3H), 1.27 (s, 12H), 0.73 (d,  $J = 6.2\text{ Hz}$ , 6H);  $^{13}\text{C}$  NMR (101 MHz,  $\text{CDCl}_3$ )  $\delta$  171.01, 135.88, 132.99, 129.92, 128.60, 127.71, 80.08, 49.54, 48.91, 37.36, 28.74, 28.37, 26.45, 25.70, 23.46, 22.48. HRMS (ESI):  $m/z$  calculated for  $[\text{C}_{24}\text{H}_{36}\text{BNO}_3 + \text{H}]^+$  398.2861, found: 398.2870.  $^{11}\text{B}$  NMR (160 MHz,  $\text{CDCl}_3$ )  $\delta$  12.16.

**(E)-3-cyclopentyl-2-phenyl-1-(pyrrolidin-1-yl)-3-(4,4,5,5-tetramethyl-1,3,2-dioxaborolan-2-yl)prop-2-en-1-one (3l):**

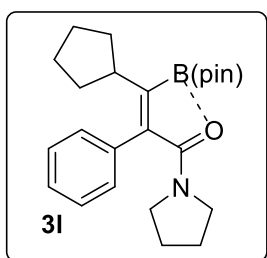

Synthesized using general procedure **2b.1**, purified by silica gel column chromatography (35% EtOAc/hexane), white solid compound, yield (56 mg) 71%.  $^1\text{H}$  NMR (400 MHz,  $\text{CDCl}_3$ )  $\delta$  ppm 7.34-7.29 (m, 3H), 7.10-7.08 (m, 2H), 3.68 (t,  $J = 6.84\text{ Hz}$ , 2H), 2.75 (t,  $J = 6.88\text{Hz}$ , 2H), 2.49-2.43 (m, 1H), 2.09-2.04 (m, 2H), 1.76-1.66 (m, 6H), 1.55-1.38 (m, 4H), 1.27 (s, 12H);  $^{13}\text{C}$  NMR (126 MHz,  $\text{CDCl}_3$ )  $\delta$  170.37, 136.63, 133.35, 130.17, 128.62, 127.69, 80.30, 49.46, 48.60, 43.61, 31.46, 26.53, 26.48, 26.18, 23.42. HRMS (ESI):  $m/z$  calculated for  $[\text{C}_{24}\text{H}_{34}\text{BNO}_3 + \text{H}]^+$  396.2705, found: 396.2713.

**(E)-3-cyclohexyl-2-phenyl-1-(pyrrolidin-1-yl)-3-(4,4,5,5-tetramethyl-1,3,2-dioxaborolan-2-yl)prop-2-en-1-one (3m):**

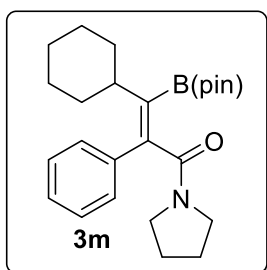

Synthesized using general procedure **2b.1**, purified by silica gel column chromatography (35% EtOAc/hexane), white solid compound, yield (57 mg) 70%.  $^1\text{H}$  NMR (400 MHz,  $\text{CDCl}_3$ )  $\delta$  ppm 7.33-7.30 (m, 3H), 7.09-7.08 (m, 2H), 3.69 (t,  $J = 6.95\text{ Hz}$ , 2H), 2.73 (t,  $J = 6.9\text{Hz}$ , 2H), 2.23-2.16 (m, 1H), 1.75-1.61(m, 10H), 1.56-1.49 (m, 4H), 1.31 (s, 12H);  $^{13}\text{C}$  NMR (126 MHz,  $\text{CDCl}_3$ )  $\delta$  170.81, 136.73, 132.40, 130.17, 128.61, 127.73, 80.29, 49.58, 48.56, 42.30, 30.52, 29.85, 26.48, 26.43, 26.23, 23.41. HRMS (ESI):  $m/z$  calculated for  $[\text{C}_{25}\text{H}_{36}\text{BNO}_3 + \text{H}]^+$  410.2861, found: 410.2871.

**2b.2. Synthesis of tri-substituted MIDA-based organoboronates**

To a flame-dried reaction tube, 2,2,6,6-Tetramethylpiperidine (HTMP) (0.24 mmol, 1.2 equiv) in dry THF (1 mL) at -78 °C was added n-BuLi (1.2 equiv) drop-wise for 5 min under argon atmosphere. The reaction mixture was stirred for 30 min at the same temperature. The reaction was then cooled to 0 °C and stirred for another 30 min. Geminal-bis boronates (0.24 mmol, 1.2 equiv) were dissolved in dry THF (1 ml) added to the reaction mixture and stirred for 5 min. After that, a THF solution of keto-amide (0.2mmol) was added and stirred for 2h. Next, the reaction was worked up with EtOAc, and the crude was further dissolved in dry DMSO, MIDA(0.4 mmol, 2 equiv.) was added and degassed. HC(OMe)<sub>3</sub> (0.6 mmol, 3 equiv.) was added and stirred for 12 h at 100 °C.

**(Z)-4-methyl-8-(3-oxo-2-phenyl-3-(pyrrolidin-1-yl)prop-1-en-1-yl)dihydro-4H,8H-[1,3,2]oxazaborolo[2,3-b][1,3,2]oxazaborole-2,6(3H,5H)-dione (3n):**

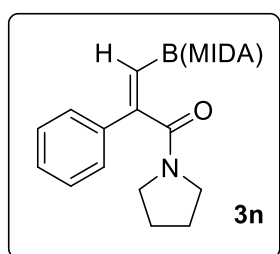

Synthesized using general procedure **2b.2**, purified by silica gel column chromatography (25% EtOAc/hexane), yellow oil, yield (44 mg) 62%. <sup>1</sup>H NMR (500 MHz, CDCl<sub>3</sub>) δ 7.43 (d, *J* = 7.9 Hz, 2H), 7.37 – 7.29 (m, 3H), 6.01 (s, 1H), 4.15 – 4.07 (m, 1H), 3.81 (d, *J* = 16.5 Hz, 2H), 3.50 (t, *J* = 6.9 Hz, 2H), 3.15 (s, 2H), 3.03 (s, 1H), 1.90-1.78 (m, 4H). <sup>13</sup>C NMR (101 MHz, CDCl<sub>3</sub>) δ 170.25, 168.00, 152.90, 136.62, 128.98, 128.90, 125.90, 63.18, 48.10, 47.54, 45.49, 25.79, 24.49. HRMS (ESI): *m/z* calculated for [C<sub>18</sub>H<sub>21</sub>BN<sub>2</sub>O<sub>5</sub> + H]<sup>+</sup> 357.1616, found: 357.1626.

**(Z)-N,N-diethyl-3-(4-methyl-2,6-dioxotetrahydro-2H-4H,8H-[1,3,2]oxazaborolo[2,3-b][1,3,2]oxazaborol-8-yl)-2-phenylacrylamide (3o):**

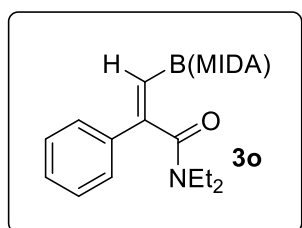

Synthesized using general procedure **2b.2**, purified by silica gel column chromatography (25% EtOAc/hexane), white solid, yield (47mg) 66%. <sup>1</sup>H NMR (400 MHz, CDCl<sub>3</sub>) δ 7.42-7.26 (m, 6H), 5.98 (s, 1H), 3.92-3.65 (m, 4H), 3.22-3.09 (m, 4H), 3.01 (s, 3H), 1.19 (t, *J* = 7.2 Hz, 3H), 0.91 (t, *J* = 7.2 Hz, 3H). <sup>13</sup>C NMR (101 MHz, CDCl<sub>3</sub>) δ 171.01, 152.48, 137.60, 128.99, 128.87, 125.74, 63.10, 47.96, 43.20, 39.07, 13.07, 12.71. HRMS (ESI): *m/z* calculated for [C<sub>18</sub>H<sub>23</sub>BN<sub>2</sub>O<sub>5</sub> + H]<sup>+</sup> 359.1773, found: 359.1792. <sup>11</sup>B NMR (160 MHz, CDCl<sub>3</sub>) δ 10.90.

## 2c. General procedure for the Zweifel Olefination Reaction

In a flame-dried reaction tube 4a (0.11mmol, 1 equiv.) was taken in dry THF (1ml) and cooled to -78 °C, Ar-Li (1.2 equiv.) was added dropwise and stirred for 30 mins. Then stirred for another 30 mins at rt and cooled to 0 °C. NaOMe (0.1ml) and I<sub>2</sub> (0.14 mmol, 1.3 equiv) in MeOH:THF (1:3) were added successively and stirred for 45 mins. After completion of the reaction sodium thiosulphate solution was added, and MeOH was evaporated in the rota and work-up with EtOAc. The organic layer was dried over Na<sub>2</sub>SO<sub>4</sub> and concentrated in a vacuum. The crude product was purified by flash column chromatography.

**(E)-1-methyl-3-(2-methyl-1-phenylpropylidene)indolin-2-one (4a):**<sup>4</sup>

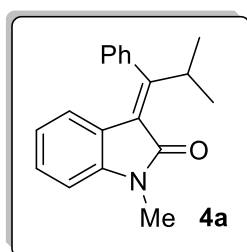

Synthesized using general procedure 2c, purified by silica gel flash column chromatography (10% EtOAc/hexane), yellowish solid compound, yield (19 mg) 62%. <sup>1</sup>H NMR (500 MHz, CDCl<sub>3</sub>) δ 7.49 – 7.45 (m, 3H), 7.14 – 7.08 (m, 3H), 6.72 (d, *J* = 7.7 Hz, 1H), 6.57 (td, *J* = 7.8 Hz, 1.2 Hz, 1H), 5.59 (d, *J* = 7.7 Hz, 1H), 5.01 (hept, *J* = 6.9 Hz, 1H), 3.26 (s, 3H), 1.07 (d, *J* = 6.9 Hz, 6H). <sup>13</sup>C NMR (126 MHz, CDCl<sub>3</sub>) δ 167.89, 164.48, 142.52, 138.29, 128.92, 128.11, 127.93, 127.49, 123.39, 123.23, 122.97, 121.57, 107.41, 28.62, 25.82, 20.89. HRMS (ESI): *m/z* calculated for [C<sub>19</sub>H<sub>19</sub>NO+ H]<sup>+</sup> 278.1539, found: 278.1534.

**(E)-3-(1-(furan-2-yl)-2-methylpropylidene)-1-methylindolin-2-one (4b):**

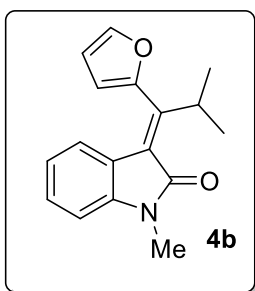

Synthesized using general procedure 2c, purified by silica gel flash column chromatography (10% EtOAc/hexane), yellowish solid compound, yield (18 mg) 60%. <sup>1</sup>H NMR (400 MHz, CDCl<sub>3</sub>) δ ppm 7.59-7.58 (m, 1H), 7.19-7.15(m, 1H), 6.79-6.73 (m, 2H), 6.57-6.55 (m, 1H), 6.42-6.40 (m, 1H), 5.96-5.93 (m, 1H), 4.95-4.90 (m, 1H), 3.24 (3H, s), 1.11-1.08 (m, 6H). <sup>13</sup>C NMR (126 MHz, CDCl<sub>3</sub>) δ 167.53, 151.39, 149.84, 142.75, 142.62, 128.85, 126.62, 123.13, 122.62, 121.97, 111.23, 110.06, 107.64, 28.30, 25.90, 20.66. HRMS (ESI): *m/z* calculated for [C<sub>17</sub>H<sub>17</sub>NO<sub>2</sub>+ H]<sup>+</sup> 268.1332, found: 268.1332.

**(E)-1-methyl-3-(2-methyl-1-(thiophen-2-yl)propylidene)indolin-2-one (4c):**

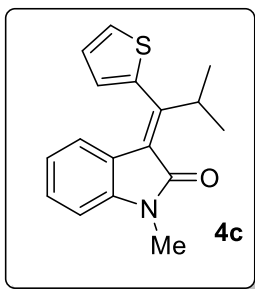

Synthesized using general procedure **2c**, purified by silica gel flash column chromatography (10% EtOAc/hexane), yellowish gummy compound, yield (18 mg) 59%. <sup>1</sup>H NMR (400 MHz, CDCl<sub>3</sub>) δ ppm 7.48 (d, *J* = 5 Hz, 1H), 7.18-7.13 (m, 2H), 6.85-6.84 (m, 1H), 6.73 (d, *J* = 7.76 Hz, 1H), 6.68 (t, *J* = 7.64 Hz, 1H), 5.84 (d, *J* = 7.76 Hz, 1H), 4.97 (h, *J* = 6.7 Hz, 1H), 3.24 (3H, s), 1.10 (d, *J* = 6.92 Hz, 6H). <sup>13</sup>C NMR (101 MHz, CDCl<sub>3</sub>) δ 167.26, 157.26, 142.62, 137.71, 128.70, 127.58, 126.31, 126.14, 126.02, 123.50, 122.83, 121.85, 107.54, 28.55, 25.87, 20.71. HRMS (ESI): *m/z* calculated for [C<sub>17</sub>H<sub>17</sub>NOS+ H]<sup>+</sup> 284.1104, found: 284.1098.

**(E)-1-methyl-3-(2-methyl-1-(1-methyl-1H-indol-2-yl)propylidene)indolin-2-one (4d):**

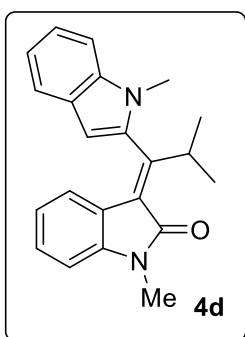

Synthesized using general procedure **2c**, purified by silica gel flash column chromatography (10% EtOAc/hexane), yellowish gummy compound, yield (26 mg) 72%. <sup>1</sup>H NMR (400 MHz, CDCl<sub>3</sub>) δ 7.71 (d, *J* = 8.2 Hz, 1H), 7.40 (d, *J* = 8.2 Hz, 1H), 7.31 (t, *J* = 7.4 Hz, 1H), 7.22 (t, *J* = 7.3 Hz, 1H), 7.13 (t, *J* = 7.6 Hz, 1H), 6.75 (d, *J* = 7.7 Hz, 1H), 6.58 (t, *J* = 7.4 Hz, 1H), 6.43 (m, 1H), 5.38 (d, *J* = 7.5 Hz, 1H), 5.07-5.00 (m, 1H), 3.49 (s, 1H), 3.29 (s, 1H), 1.32 (d, *J* = 5.8 Hz, 3H), 0.95 (d, *J* = 6.0 Hz, 1H). <sup>13</sup>C NMR (126 MHz, CDCl<sub>3</sub>) δ 167.21, 153.35, 142.71, 137.27, 135.44, 128.97, 128.02, 127.18, 122.67, 122.59, 122.40, 121.94, 121.14, 120.18, 109.96, 107.58, 100.28, 30.27, 29.05, 25.90, 21.14, 19.99. HRMS (ESI): *m/z* calculated for [C<sub>22</sub>H<sub>22</sub>N<sub>2</sub>O+ H]<sup>+</sup> 331.1805, found: 331.1809.

**(E)-3-(1-(benzo[*b*]thiophen-2-yl)-2-methylpropylidene)-1-methylindolin-2-one (4e):**

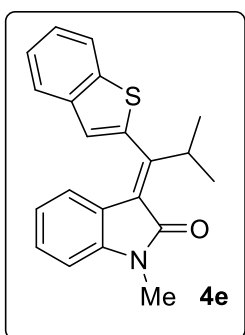

Synthesized using general procedure **2c**, purified by silica gel flash column chromatography (10% EtOAc/hexane), yellowish solid compound, yield (21 mg) 58%. <sup>1</sup>H NMR (400 MHz, CDCl<sub>3</sub>) δ ppm 7.91 (d, *J* = 7.0 Hz, 1H), 7.84 (d, *J* = 8.9 Hz, 1H), 7.45 – 7.38 (m, 2H), 7.14 (t, *J* = 7.7 Hz, 1H), 7.10 (s, 1H), 6.74 (d, *J* = 7.8 Hz, 1H), 6.61 (t, *J* = 7.7 Hz, 1H), 6.12 (d, *J* = 7.8 Hz, 1H), 5.03 (hept, *J* = 6.8 Hz, 1H), 3.26 (s, 3H), 1.15 (d, *J* = 6.3 Hz, 6H). <sup>13</sup>C NMR (101 MHz, CDCl<sub>3</sub>) δ 167.28, 156.54, 142.73, 140.40, 139.96, 138.40, 128.94, 125.85, 124.68, 124.10, 123.84, 122.71, 122.60, 122.50, 122.04, 107.64, 28.64, 25.95. HRMS (ESI): *m/z* calculated for [C<sub>21</sub>H<sub>19</sub>NOS+ H]<sup>+</sup> 334.1260, found: 334.1267.

## 2d. General procedure for the Suzuki-Miyaura Cross-Coupling Reaction

A mixture of **4** (0.083 mmol), aryl iodide (0.099 mmol), NaOH (3M, 0.249 mmol) and [Pd(P-<sup>t</sup>Bu<sub>3</sub>)<sub>2</sub>] (5 mol%) in dioxane (2 ml) were degassed and heated at 90 °C for 16 h. After cooling the mixture, was filtered through celite and washed with EtOAc. The organic part was concentrated in vacuo and further purified using flash column chromatography.

### (Z)-1-methyl-3-(2-methyl-1-phenylpropylidene)indolin-2-one (**5a**):

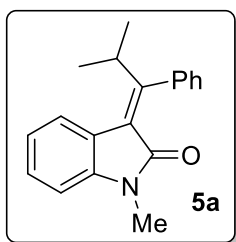

Synthesized using general procedure **2d**, purified by silica gel flash column chromatography (10% EtOAc/hexane), yellow solid compound, yield (16 mg) 71%. <sup>1</sup>H NMR (500 MHz, CDCl<sub>3</sub>) δ ppm 7.72(d, *J* = 7.7 Hz, 1H), 7.43 (t, *J* = 7.15Hz, 2H), 7.39-7.36 (m, 1H), 7.31 (t, *J* = 7.7Hz, 1H), 7.11-7.07 (m, 3H), 6.82 (d, *J* = 7.95Hz, 1H), 3.78 (hept., *J* = 6.85Hz, 1H), 3.11 (s, 3H), 1.14 (d, *J* = 6.85Hz, 6H); <sup>13</sup>C NMR (126 MHz, CDCl<sub>3</sub>) δ 166.92, 162.59, 143.77, 138.56, 128.70, 128.03, 127.18, 127.15, 124.29, 123.17, 122.41, 121.89, 107.92, 32.08, 25.76, 20.43. HRMS (ESI): *m/z* calculated for [C<sub>19</sub>H<sub>19</sub>NO+ H]<sup>+</sup> 278.1539, found 278.1553.

### (Z)-1-methyl-3-(2-methyl-1-(thiophen-2-yl)propylidene)indolin-2-one (**5b**):

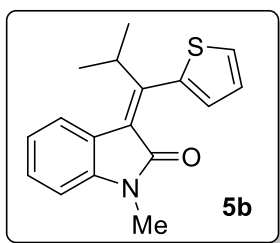

Synthesized using general procedure **2d**, purified by silica gel flash column chromatography (10% EtOAc/hexane), yellowish gummy compound, yield (15 mg) 64%. <sup>1</sup>H NMR (500 MHz, CDCl<sub>3</sub>) δ 7.69 (d, *J* = 7.7 Hz, 1H), 7.42 (d, *J* = 6.0 Hz, 1H), 7.31 (t, *J* = 7.7 Hz, 1H), 7.13-7.11 (m, 1H), 7.07 (t, *J* = 8.15 Hz, 1H), 6.82 – 6.79 (m, 2H), 3.75 (hept, *J* = 6.9 Hz, 1H), 3.13 (s, 3H), 1.18 (d, *J* = 6.7 Hz, 6H). <sup>13</sup>C NMR (126 MHz, CDCl<sub>3</sub>) δ 166.42, 155.02, 143.89, 137.82, 129.24, 126.95, 126.12, 125.73, 125.63, 124.53, 122.13, 121.98, 108.03, 32.19, 25.86, 20.24. HRMS (ESI): *m/z* calculated for [C<sub>17</sub>H<sub>17</sub>NOS+ H]<sup>+</sup> 284.1104, found: 284.1105.

### (Z)-1-methyl-3-(phenyl(p-tolyl)methylene)indolin-2-one (**5c**):



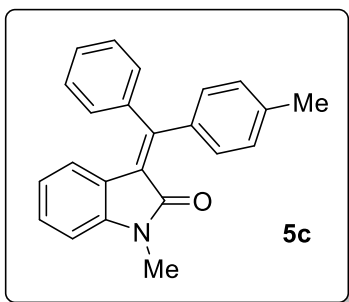

Synthesized using general procedure **2d**, purified by silica gel flash column chromatography (10% EtOAc/hexane), yellowish solid compound, yield (18 mg) 67%.  $^1\text{H}$  NMR (400 MHz,  $\text{CDCl}_3$ )  $\delta$  ppm 7.44-7.41 (m, 3H), 7.32-7.30 (m, 2H), 7.25-7.23 (m, 3H), 7.17-7.13 (m, 3H), 6.76 (d,  $J = 7.84$ , 1H), 6.67 (t,  $J = 7.64$  Hz, 1H), 6.39 (d,  $J = 7.76$  Hz, 1H), 3.21 (s, 3H), 2.37 (s, 3H);  $^{13}\text{C}$  NMR (101 MHz,  $\text{CDCl}_3$ )  $\delta$  167.00, 155.05, 143.24, 141.57, 139.54, 137.60, 137.08, 130.38, 129.60, 129.26, 128.98, 128.66, 128.63, 123.91, 123.59, 123.14, 121.42, 107.74, 25.97, 21.64. HRMS (ESI):  $m/z$  calculated for  $[\text{C}_{23}\text{H}_{19}\text{NO} + \text{H}]^+$  326.1539, found: 326.1541.

**(Z)-3-((4-chlorophenyl)(phenyl)methylene)-1-methylindolin-2-one (5d):<sup>5</sup>**

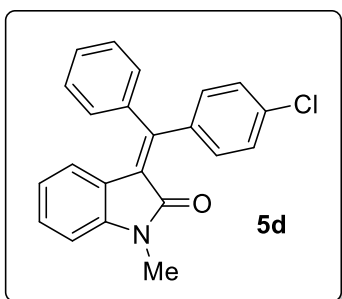

Synthesized using general procedure **2d**, purified by silica gel column chromatography (10% EtOAc/hexane), yellowish solid compound, yield (20 mg) 70%.  $^1\text{H}$  NMR (400 MHz,  $\text{CDCl}_3$ )  $\delta$  7.45-7.42 (m, 3H), 7.34 – 7.23 (m, 6H), 7.18 (t,  $J = 8.0$  Hz, 1H), 6.77 (d,  $J = 8.1$  Hz, 1H), 6.69 (t,  $J = 7.9$  Hz, 1H), 6.42 (d,  $J = 8.0$  Hz, 1H), 3.21 (s, 3H).  $^{13}\text{C}$  NMR (101 MHz,  $\text{CDCl}_3$ )  $\delta$  166.85, 153.02, 143.45, 140.97, 138.37, 135.33, 131.66, 129.53, 129.50, 129.16, 129.13, 128.23, 124.71, 123.33, 123.16, 121.63, 107.92, 26.00. HRMS (ESI):  $m/z$  calculated for  $[\text{C}_{22}\text{H}_{16}\text{ClNO} + \text{H}]^+$  346.0993, found: 346.0998.

**(E)-1-methyl-3-(phenyl(p-tolyl)methylene)indolin-2-one (5e):**

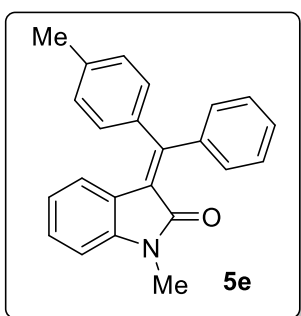

Synthesized using general procedure **2d**, purified by silica gel flash column chromatography (10% EtOAc/hexane), yellowish solid compound, yield (18 mg) 68%.  $^1\text{H}$  NMR (400 MHz,  $\text{CDCl}_3$ )  $\delta$  ppm 7.41-7.35 (m, 5H), 7.28-7.25 (m, 4H), 7.22-7.19 (m, 1H), 6.80 (d,  $J = 7.68$  Hz, 1H), 6.75 (t,  $J = 7.44$  Hz, 1H), 6.61 (d,  $J = 7.60$  Hz, 1H), 3.24 (s, 3H), 2.46 (3H, s).  $^{13}\text{C}$  NMR (101 MHz,  $\text{CDCl}_3$ )  $\delta$  167.04, 155.07, 143.32, 140.37, 139.54, 138.45, 130.21, 129.67, 129.65, 129.15, 128.69, 127.89, 123.95, 123.53, 123.14, 121.42, 107.76, 25.96, 21.61. HRMS (ESI):  $m/z$  calculated for  $[\text{C}_{23}\text{H}_{19}\text{NO} + \text{H}]^+$  326.1539, found: 326.1544.

**(Z)-3-((3-methoxyphenyl)(p-tolyl)methylene)-1-methylindolin-2-one (5f):**

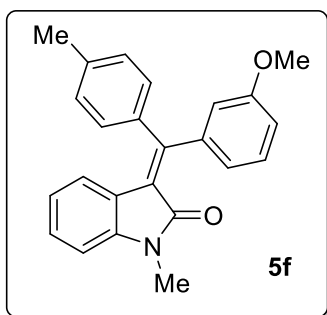

Synthesized using general procedure **2d**, purified by silica gel flash column chromatography (10% EtOAc/hexane), yellowish solid compound, yield (19 mg) 65%.  $^1\text{H}$  NMR (400 MHz,  $\text{CDCl}_3$ )  $\delta$  ppm 7.29-7.13 (m, 6H), 6.93-6.88 (m, 2H), 6.81-6.79 (m, 1H), 6.74 (d,  $J = 7.72$  Hz, 1H), 6.69 (t,  $J = 7.64$  Hz, 1H), 6.55 (d,  $J = 7.64$  Hz, 1H), 3.75 (s, 3H), 3.19 (s, 3H), 2.41 (3H, s).  $^{13}\text{C}$  NMR (101 MHz,  $\text{CDCl}_3$ )  $\delta$  166.91, 159.21, 154.68, 143.37, 141.83, 139.51, 138.25, 129.67, 129.51, 128.87, 128.76, 124.13, 123.46, 123.17, 122.60, 121.41, 115.74, 114.37, 107.75, 55.32, 25.98, 21.61. HRMS (ESI):  $m/z$  calculated for  $[\text{C}_{24}\text{H}_{21}\text{NO}_2 + \text{H}]^+$  356.1645, found: 356.1649.

**(Z)-3-((E)-1,5-diphenylpent-1-en-3-ylidene)-1-methylindolin-2-one (5g):**

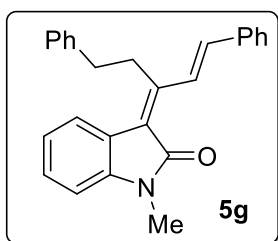

Synthesized using general procedure **2d**, purified by silica gel flash column chromatography (10% EtOAc/hexane), yellowish gummy compound, yield (22 mg) 72%.  $^1\text{H}$  NMR (400 MHz,  $\text{CDCl}_3$ )  $\delta$  ppm 9.35 (d,  $J = 16.44$  Hz, 1H), 7.64-7.61 (m, 3H), 7.41-7.36 (m, 6H), 7.32-7.26 (m, 3H), 7.15 (d,  $J = 16.44$  Hz, 1H), 7.06 (t,  $J = 75.6$  Hz, 1H), 6.86 (d,  $J = 7.68$  Hz, 1H), 3.32-3.29 (m, 5H), 3.02-2.98 (m, 2H);  $^{13}\text{C}$  NMR (126 MHz,  $\text{CDCl}_3$ )  $\delta$  168.33, 151.88, 143.06, 141.18, 137.33, 136.67, 129.05, 128.92, 128.46, 128.36, 128.01, 126.80, 126.65, 123.97, 123.23, 122.80, 122.12, 108.02, 34.57, 31.21, 25.89. HRMS (ESI):  $m/z$  calculated for  $[\text{C}_{26}\text{H}_{23}\text{NO} + \text{H}]^+$  366.1852, found: 366.1856.

**2e. General procedure for the synthesis of 1,3 di-carbonyl compound**

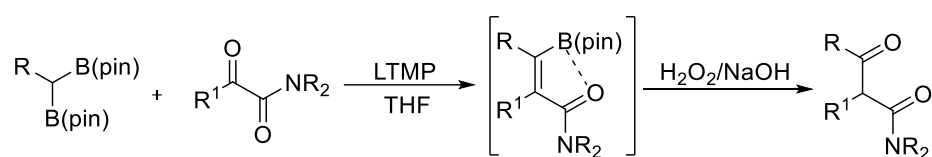

To a flame-dried reaction tube 2,2,6,6-Tetramethylpiperidine (HTMP) (0.24 mmol, 1.2 equiv) in dry THF (1 mL) at  $-78$  °C was added  $n\text{-BuLi}$  (1.2 equiv) drop-wise for 5 min under argon atmosphere. The reaction mixture was stirred for 30 min at the same temperature. The reaction was then cooled to  $0$  °C and stirred for another 30 min. Geminal-bis boronates (0.24 mmol, 1.2 equiv) were dissolved in dry THF (1 ml) added to the reaction mixture and stirred for 5 min. Then the reaction mixture was transferred to a solution of  $\alpha$ -keto-amide /  $N$ -alkyl-oxindole (0.2 mmol) in THF at  $0$  °C and further stirred for 2 h. After completion of the reaction 2ml water was added and the product was extracted with EtOAc ( $3 \times 5$  mL). The organic layer was dried

over Na<sub>2</sub>SO<sub>4</sub> and concentrated in vacuum to afford the crude product. This crude material was further purified by flash column chromatography. Then the product was oxidized using H<sub>2</sub>O<sub>2</sub>/NaOH (1:1) in THF at 0 °C. After, 15 mins. the reaction was extracted with EtOAc and further purified using column chromatography.

### 2-phenyl-1-(pyrrolidin-1-yl)butane-1,3-dione (6a):

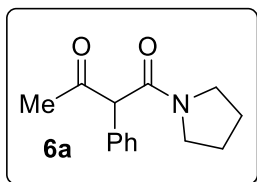

Synthesized using general procedure **2e**, purified by silica gel column chromatography (20% EtOAc/hexane), colorless oil, yield (30 mg) 65%. <sup>1</sup>H NMR (400 MHz, CDCl<sub>3</sub>) δ ppm 7.39-7.32 (m, 5H), 4.67 (s, 1H), 3.59-3.54 (m, 1H), 3.49-3.42 (m, 2H), 3.15-3.12 (m, 1H), 2.22 (s, 3H), 1.94-1.79 (m, 4H); <sup>13</sup>C NMR (101 MHz, CDCl<sub>3</sub>) δ 203.84, 167.15, 133.66, 129.15, 128.11, 65.75, 46.94, 46.24, 29.03, 26.15, 24.38. HRMS (ESI): m/z calculated for [C<sub>14</sub>H<sub>17</sub>NO<sub>2</sub>+ H]<sup>+</sup> 232.1332, found: 232.1330.

### 2,5-diphenyl-1-(pyrrolidin-1-yl)pentane-1,3-dione (6b):

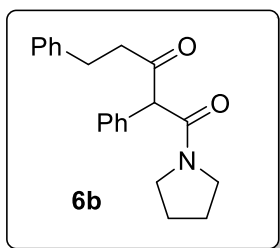

Synthesized using general procedure **2e**, purified by silica gel column chromatography (20% EtOAc/hexane), colorless oil, yield (43 mg) 67%. <sup>1</sup>H NMR (400 MHz, CDCl<sub>3</sub>) δ ppm 7.37-7.30 (m, 3H), 7.28-7.22 (m, 4H), 7.17-7.11 (m, 3H), 4.63(s, 1H), 3.58-3.51 (m, 1H), 3.49-3.42 (m, 1H), 3.37-3.31 (m, 1H), 3.11-3.05 (m, 1H), 3.01-2.92 (m, 1H), 2.89-2.80 (m, 2H), 2.76 -2.69 (m 1H), 1.92-1.75 (m, 4H); <sup>13</sup>C NMR (101 MHz, CDCl<sub>3</sub>) δ 204.77, 167.17, 141.21, 133.33, 129.25, 129.09, 128.54, 128.50, 128.05, 126.09, 65.39, 46.88, 46.22, 43.13, 30.08, 26.11, 24.35. HRMS (ESI): m/z calculated for [C<sub>21</sub>H<sub>23</sub>NO<sub>2</sub>+ H]<sup>+</sup> 322.1802, found: 322.1796.

### N,N-diethyl-3-oxo-2,5-diphenylpentanamide (6c):

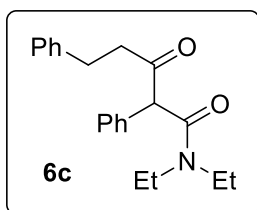

Synthesized using general procedure **2e**, purified by silica gel column chromatography (20% EtOAc/hexane), colorless oil, yield (47 mg) 72%. <sup>1</sup>H NMR (400 MHz, CDCl<sub>3</sub>) δ ppm 7.37-7.30 (m, 3H), 7.26-7.22 (m, 4H), 7.18-7.11 (m, 3H), 4.67 (s, 1H), 3.54-3.45 (m, 1H), 3.31-3.23 (m, 1H), 3.20-3.13 (m, 1H), 3.10-3.01 (m, 1H), 2.99-2.80 (m, 3H), 2.73-2.65 (m, 1H) 1.12 (t, J = 6.8Hz, 3H), 1.00 (t, J = 6.96 Hz, 3H); <sup>13</sup>C NMR (101 MHz, CDCl<sub>3</sub>) δ 204.86, 168.07, 141.27, 133.91, 129.13, 128.99, 128.53, 128.50, 128.05, 126.08, 63.68, 43.24, 42.43, 40.41,

30.25, 14.24, 12.86. HRMS (ESI):  $m/z$  calculated for  $[C_{21}H_{25}NO_2 + H]^+$  324.1958, found: 324.1965.

#### 1-morpholino-2,5-diphenylpentane-1,3-dione (6d):

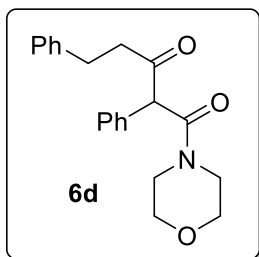

Synthesized using general procedure **2e**, purified by silica gel column chromatography (25% EtOAc/hexane), colorless oil, yield (46 mg) 68%.  $^1H$  NMR (400 MHz,  $CDCl_3$ )  $\delta$  ppm 7.38-7.32 (m, 3H), 7.26-7.16 (m, 5H), 7.15-7.11 (m, 2H), 4.68 (s, 1H), 3.76-3.66 (m, 2H), 3.60-3.44 (m, 3H). 3.25-3.11 (m, 3H), 2.97-2.84 (m, 3H), 2.73-2.66 (m, 1H);  $^{13}C$  NMR (101 MHz,  $CDCl_3$ )  $\delta$  204.52, 167.66, 141.09, 133.33, 129.36, 129.03, 128.56, 128.33, 126.20, 66.78, 66.29, 63.56, 46.52, 43.26, 42.40, 30.18. HRMS (ESI):  $m/z$  calculated for  $[C_{21}H_{23}NO_3 + H]^+$  338.1751, found: 338.1757.

#### 1-morpholino-2-phenylundecane-1,3-dione (6e):

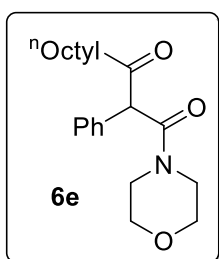

Synthesized using general procedure **2e**, purified by silica gel column chromatography (25% EtOAc/hexane), colorless oil, yield (46 mg) 66%.  $^1H$  NMR (400 MHz,  $CDCl_3$ )  $\delta$  ppm 7.40-7.32 (m, 3H), 7.26-7.23 (m, 2H), 4.76 (s, 1H), 3.80-3.67 (m, 2H), 3.61-3.52 (m, 3H), 3.37-3.31 (m, 1H), 3.25-3.20 (m, 2H), 2.63-2.54 (m, 1H), 2.40-2.31 (m, 1H), 1.55-1.48 (m, 2H), 1.24-1.20 (m, 10H), 0.87-0.82 (m, 3H);  $^{13}C$  NMR (101 MHz,  $CDCl_3$ )  $\delta$  205.47, 167.79, 133.66, 129.30, 129.02, 128.24, 66.80, 66.32, 63.34, 46.58, 42.41, 41.78, 31.93, 29.48, 29.23, 29.15, 23.89, 22.77, 14.23. HRMS (ESI):  $m/z$  calculated for  $[C_{21}H_{31}NO_3 + H]^+$  346.2377, found: 346.2388.

#### 4-methyl-3-oxo-N,N,2-triphenylpentanamide (6f):

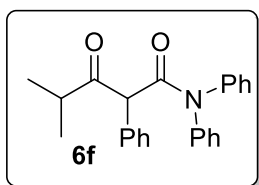

Synthesized using general procedure **2e**, purified by silica gel column chromatography (10% EtOAc/hexane), colorless oil, yield (46 mg) 64%.  $^1H$  NMR (400 MHz,  $CDCl_3$ )  $\delta$  ppm 7.41-7.29 (m, 10H), 7.24-7.17 (m, 5H), 4.99 (s, 1H), 2.66-2.59 (m, 1H), 0.96 (d,  $J = 6.72$  Hz, 3H), (0.80,  $J = 6.6$  Hz, 3H);  $^{13}C$  NMR (101 MHz,  $CDCl_3$ )  $\delta$  208.35, 168.55, 142.88, 142.54, 133.62, 130.01, 129.94, 129.35, 129.19, 129.05, 128.70, 128.51, 127.99, 126.51, 62.52, 39.49, 18.75, 18.65. HRMS (ESI):  $m/z$  calculated for  $[C_{24}H_{23}NO_2 + H]^+$  358.1802, found: 358.1816.

#### N,N-diethyl-4-methyl-3-oxo-2-phenylpentanamide (6g):

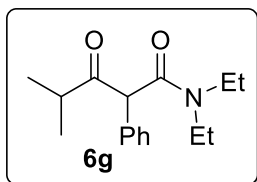

Synthesized using general procedure **2e**, purified by silica gel column chromatography (20% EtOAc/hexane), colorless oil, yield (34 mg) 65%. <sup>1</sup>H NMR (400 MHz, CDCl<sub>3</sub>) δ ppm 7.38-7.31 (m, 3H), 7.28-7.26(m, 2H), 4.89(s, 1H), 3.52-3.44 (m, 1H), 3.34-3.22 (m, 2H), 3.17-3.08 (m, 1H), 2.97-2.85 (m, 1H), 1.14-1.11 (m, 6H), 1.04 (t, *J* = 7.08 Hz, 3H), 0.98-0.96 (m, 3H); <sup>13</sup>C NMR (101 MHz, CDCl<sub>3</sub>) δ 208.88, 168.09, 133.98, 129.26, 128.94, 127.90, 61.99, 42.43, 40.38, 39.66, 19.15, 19.04, 14.19, 12.82. HRMS (ESI): *m/z* calculated for [C<sub>16</sub>H<sub>23</sub>NO<sub>2</sub>+H]<sup>+</sup> 262.1802, found: 262.1812.

### 1-methyl-3-(3-phenylpropanoyl)indolin-2-one (**6h**):

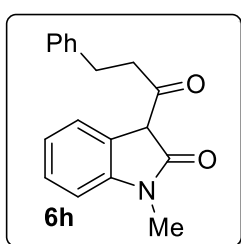

Synthesized using general procedure **2e**, purified by silica gel column chromatography (10% EtOAc/hexane), yellowish gummy compound, yield (40 mg) 71%. <sup>1</sup>H NMR (400 MHz, CDCl<sub>3</sub>) δ ppm 7.36-7.28 (m, 5H), 7.25-7.19 (m, 2H), 7.09 (t, *J* = 7.6Hz, 1 H), 6.95 (d, *J* = 7.68Hz, 1H), 4.78 (s, 0.5H), 3.55 (s, 3H), 3.12-3.03 (m, 4H); <sup>13</sup>C NMR (101 MHz, CDCl<sub>3</sub>) δ 175.49, 171.42, 140.53, 139.03, 128.79, 128.43, 126.58, 125.42, 122.32, 121.93, 119.84, 108.58, 101.55, 35.79, 31.96, 25.85. HRMS (ESI): *m/z* calculated for [C<sub>18</sub>H<sub>17</sub>NO<sub>2</sub>+H]<sup>+</sup> 280.1332, found: 280.1317.

## 2f. General procedure for Bio-active compounds

### Synthesis of AMPK activator

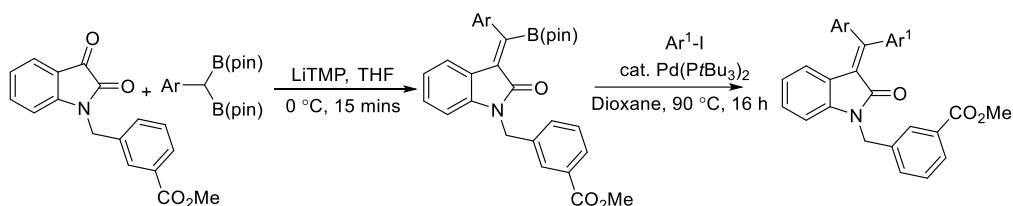

To a flame-dried reaction tube 2,2,6,6-Tetramethylpiperidine (HTMP) (0.24 mmol, 1.2 equiv) in dry THF (1 ml) at -78 °C was added *n*-BuLi (1.2 equiv) drop-wise for 5 min under argon atmosphere. The reaction mixture was stirred for 30 min at the same temperature. The reaction was then cooled to 0 °C and stirred for another 30 min. Geminal-bis boronates (0.24 mmol, 1.2 equiv) were dissolved in dry THF (1 ml) added to the reaction mixture, and stirred for 3 min. Then the reaction mixture was transferred to a solution of *N*-alkyl-oxindole (0.20 mmol) in THF at 0 °C and further stirred for 15 mins. After completion of the reaction 1ml water was added and the product was extracted with EtOAc (3 × 5 mL). The organic layer was dried over



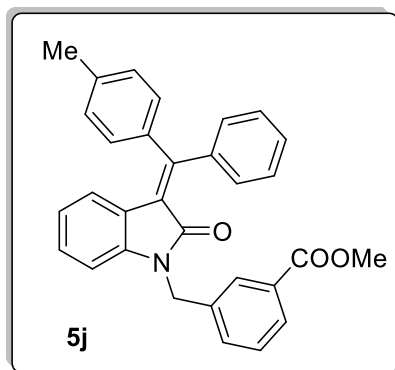

Synthesized using general procedure **2f**, purified by silica gel flash column chromatography (10% EtOAc/hexane), yellowish gummy compound, yield (1.56 gm isolated) 68%.  $^1\text{H}$  NMR (400 MHz,  $\text{CDCl}_3$ )  $\delta$  8.01 (s, 1H), 7.93 (d,  $J = 7.6$  Hz, 1H), 7.51 (d,  $J = 7.9$  Hz, 1H), 7.44-7.28 (m, 6H), 7.24-7.21 (m, 4H), 7.10-7.04 (m, 1H), 6.70 – 6.62 (m, 2H), 6.58 (d,  $J = 7.6$  Hz, 1H), 4.96 (s, 2H), 3.91 (s, 3H), 2.44 (s, 3H).  $^{13}\text{C}$

NMR (101 MHz,  $\text{CDCl}_3$ )  $\delta$  167.12, 167.00, 155.86, 142.16, 140.29, 139.73, 138.47, 137.07, 132.13, 130.67, 130.44, 129.72, 129.37, 129.04, 128.90, 128.69, 128.65, 127.96, 123.75, 123.59, 123.27, 121.66, 108.62, 52.31, 43.36, 21.63. HRMS (ESI):  $m/z$  calculated for  $[\text{C}_{31}\text{H}_{25}\text{NO}_3 + \text{H}]^+$  460.1907, found: 460.1914.

### Methyl-(Z)-3-((3-(4-methyl-1-phenylpentylidene)-2-oxoindolin-1-yl)methyl)benzoate

(**5k**):

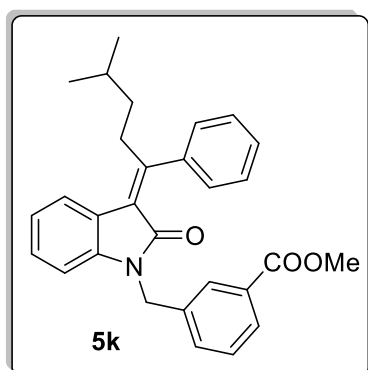

Synthesized using general procedure **2f**, purified by silica gel flash column chromatography (25% EtOAc/hexane), gummy compound, yield (68 mg) 78%.  $^1\text{H}$  NMR (400 MHz,  $\text{CDCl}_3$ )  $\delta$  7.95 (s, 1H), 7.90 (d,  $J = 7.6$  Hz, 1H), 7.63 (d,  $J = 7.7$  Hz, 1H), 7.46-7.37 (m, 4H), 7.36- 7.29 (m, 3H), 7.17 (t,  $J = 7.7$  Hz, 1H), 7.05 (t,  $J = 7.6$  Hz, 1H), 6.66 (d,  $J = 7.84$  Hz, 1H), 4.90 (s, 2H), 3.89 (s, 3H), 2.99 – 2.94 (m, 2H), 1.73-1.67 (m, 1H), 1.54-1.48

(m, 2H), 0.96 (d,  $J = 6.6$  Hz, 6H).  $^{13}\text{C}$  NMR (126 MHz,  $\text{CDCl}_3$ )  $\delta$  166.99, 166.64, 159.48, 142.39, 141.76, 137.08, 131.95, 130.69, 128.98, 128.83, 128.57, 128.53, 128.26, 128.15, 127.64, 123.65, 123.19, 122.86, 122.16, 108.88, 77.41, 76.91, 52.27, 43.22, 36.54, 35.a3, 28.92, 22.53. HRMS (ESI):  $m/z$  calculated for  $[\text{C}_{19}\text{H}_{29}\text{NO}_3 + \text{H}]^+$  440.2220, found: 440.2227.

### 3. $^{11}\text{B}$ -NMR study of reaction with $\alpha$ -keto-amide:

#### $^{11}\text{B}$ -NMR study with keto-amide

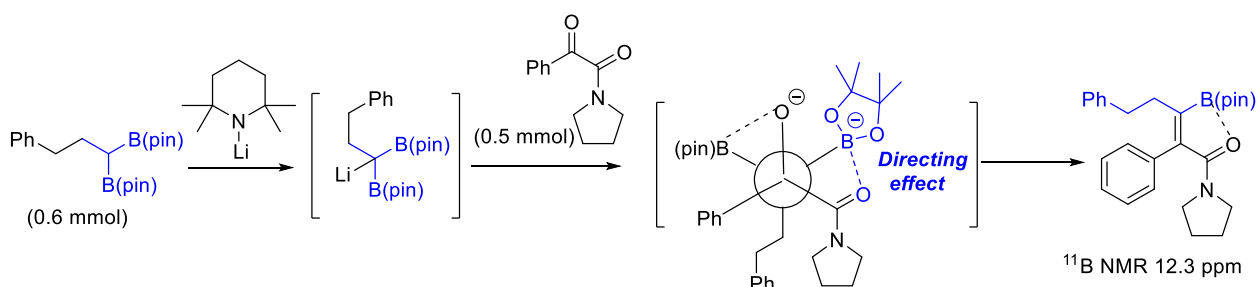

We have tried the *in situ*  $^{11}\text{B}$  NMR studies to elucidate the reaction intermediates. We have taken 2,2,6,6-Tetramethylpiperidine (HTMP) (0.6 mmol, 1.2 equiv) in dry THF (2 mL) at  $-78^\circ\text{C}$  in

which n-BuLi (1.2 equiv) drop-wise for 5 min under argon atmosphere. The reaction mixture was stirred for 30 min at the same temperature. The reaction was then cooled to 0 °C and stirred for another 30 min. Geminal-bis boronates (0.6 mmol, 1.2 equiv) were dissolved in dry THF (2 ml) added to the reaction mixture, and stirred for 5 min. Then the reaction mixture was transferred to a solution of  $\alpha$ -keto amide (0.5 mmol) in THF at -78 °C and further stirred for 30 mins at 0 °C. We have recorded the  $^{11}\text{B}$  NMR in THF using  $\text{CDCl}_3$  capillary inside the NMR tube for lock purposes. The  $^{11}\text{B}$  NMR indicates the formation of the desired product at 12.3 ppm as well as a peak at 4.8 ppm indicating the formation of boronate species. We have also seen a peak  $\sim 34$  ppm arise due to the presence of unreacted geminal bis boronates, which was taken in excess.

sp.kkdphbpin.5.fid  
sp / kkd / bpin - 11B-500mhz

33.6029

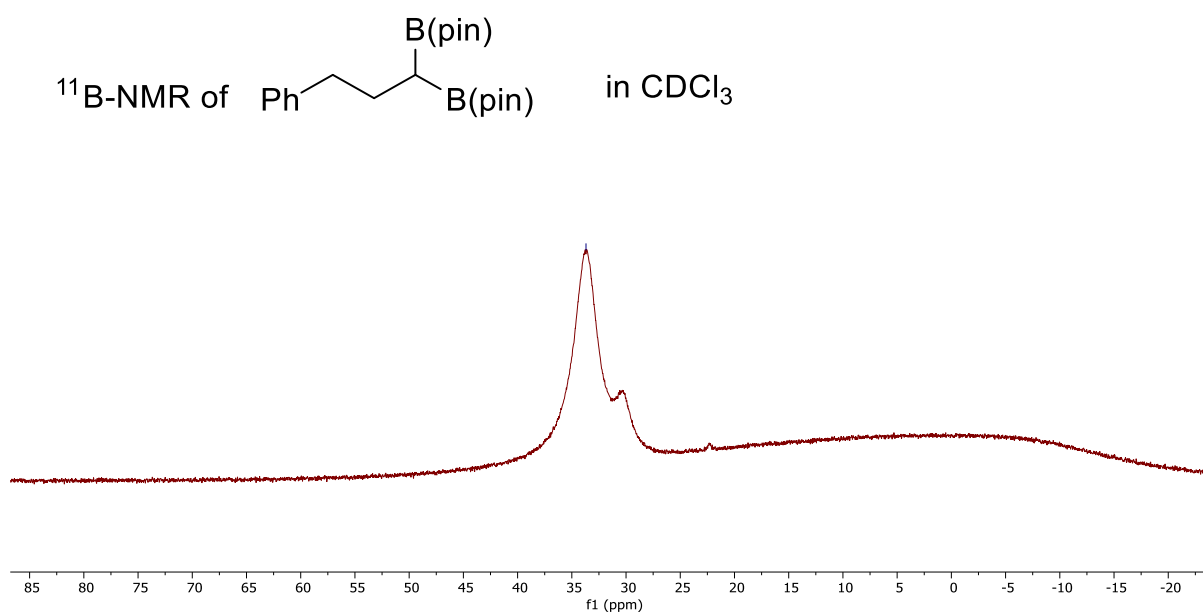



sp.dg672b.10.fid  
sp / dg / 672 b - 11B -500mhz

11.9917

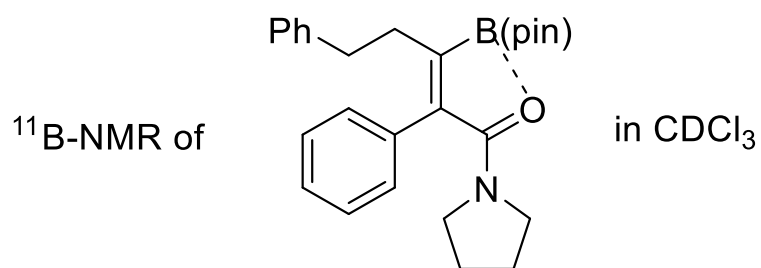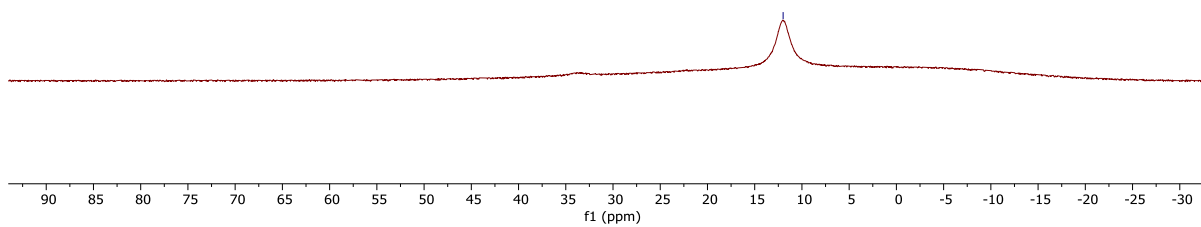

sp.dg735b.5.fid  
sp / dg / 735b - 11B -500mhz

34.0774

12.3033

4.8971

$^{11}\text{B}$ -NMR of reaction mixture in THF after 30 mins,  $\text{CDCl}_3$  capillary was inserted in the NMR tube for lock purpose

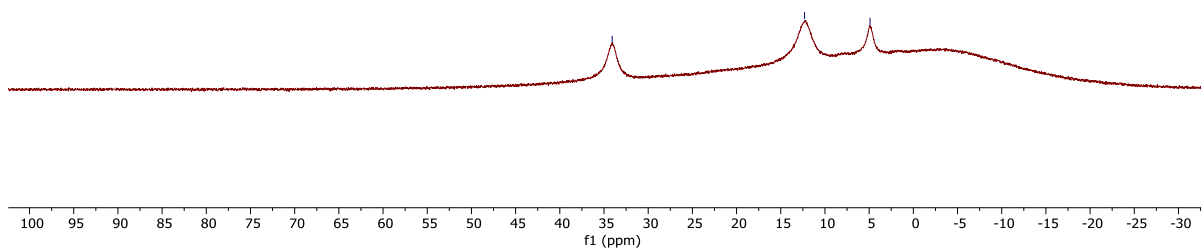

#### 4. Crystallographic Data and Structure Refinements:

All the crystals grew as colorless prisms by slow evaporation from pet ether and ethyl acetate. First, the compound was taken in a small glass vial and dissolved in a minimum amount of ethyl acetate. Then dropwise pet ether was added until the solution became faint opaque. Next, the vial was closed with a plastic cap containing a small hole for slow solvent evaporation. After one week the growing crystal was found to be visible and submitted for further characterization. Good quality single crystals of each compounds were sorted out with the help of a polarizing microscope and immersed in paratone oil, which was then mounted on the tip of glass fiber and cemented using epoxy resin. The single-crystal XRD diffraction data were collected at 298 K on a Bruker AXS (D8 Quest System) X-ray diffractometer, equipped with a PHOTON 100 CMOS detector using graphite-monochromated Mo-K $\alpha$  radiation (0.71073 Å). The linear absorption coefficients, scattering factors for the atoms, and the anomalous dispersion corrections were taken from International Tables for X-ray Crystallography. Bruker Apex III software was used for data collection, unit cell measurements, absorption corrections, scaling, and integration.<sup>5</sup> The data were reduced and an empirical absorption correction was applied with the help of SAINTPLUS software and SADABS programs using XPREP, respectively.<sup>6</sup> The structures were solved by the direct method using SHELXL-2014 in the WinGx programs. For all the cases, nonhydrogen atoms were refined anisotropically. All other hydrogen atoms were geometrically fixed using the riding atom model and assigned fixed isotropic displacement parameters. The “ACTA” command was used to generate the Crystallographic Information File (CIF). The structural details of all the compounds are presented in below. CCDC: 2266989, 2266990, 2266922, 2266991 contain the crystallographic data of these compounds 3h, 2q, 4a, 5a respectively.

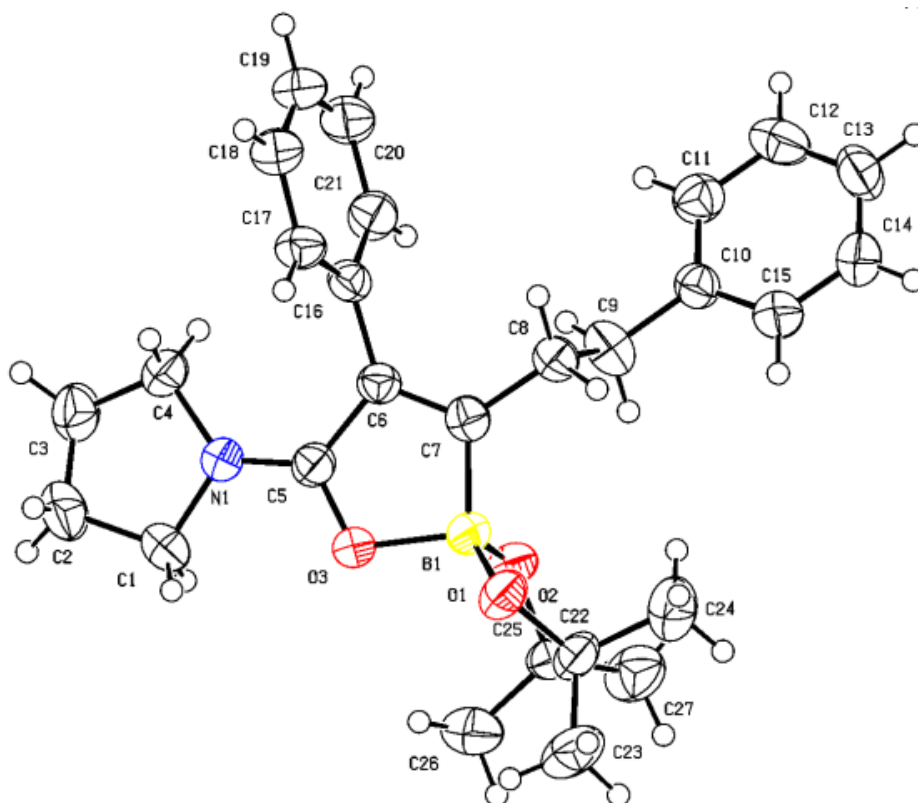

**Figure 1. Perspective view of 3h with 50% thermal ellipsoid probability**

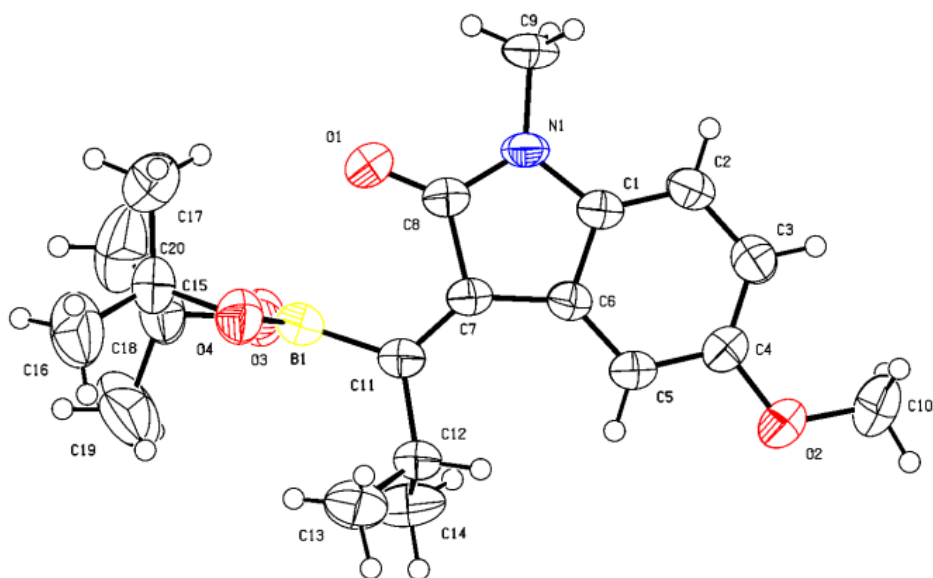

**Figure 2. Perspective view of 2q with 50% thermal ellipsoid probability**

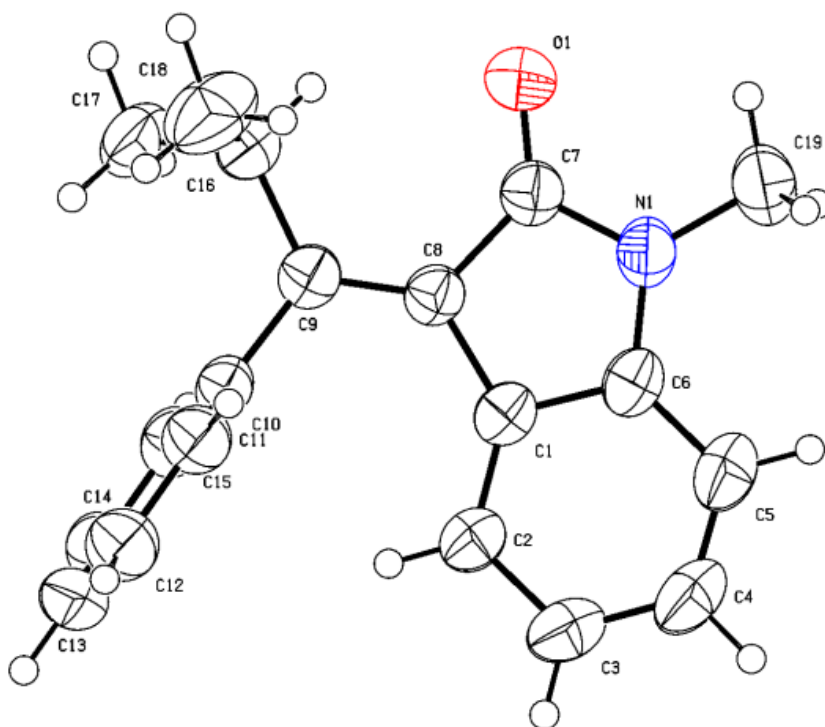

**Figure 3. Perspective view of 4a with 50% thermal ellipsoid probability**

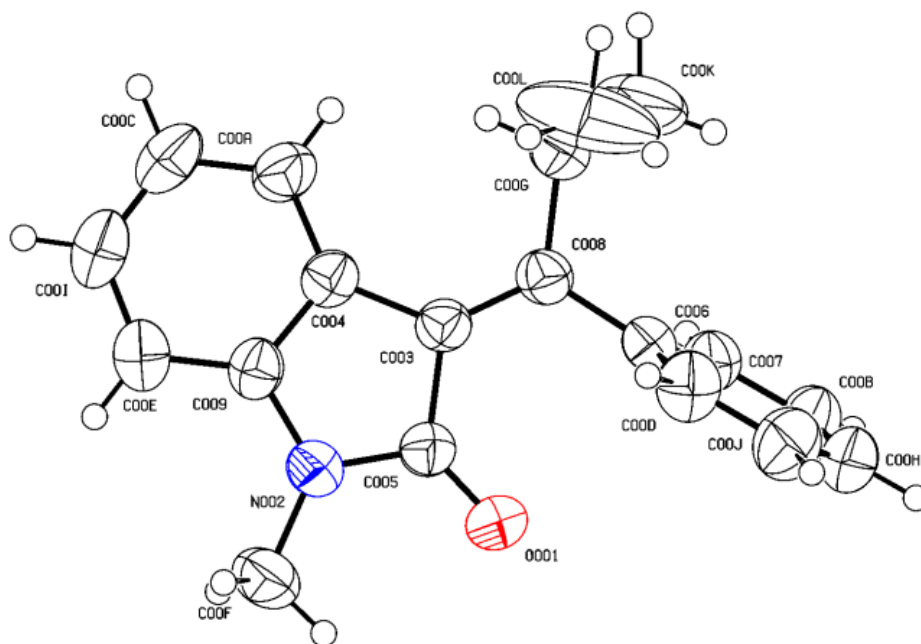

**Figure 4. Perspective view of 5a with 50% thermal ellipsoid probability**

Table 1: Crystal data and structure refinements for the molecules **2h**, **3q**, **4a**, **5a** respectively

| Entry                                            | <b>3h</b>                                        | <b>2q</b>                                        | <b>4a</b>                                  | <b>5a</b>                                  |
|--------------------------------------------------|--------------------------------------------------|--------------------------------------------------|--------------------------------------------|--------------------------------------------|
| Empirical formula                                | C <sub>27</sub> H <sub>34</sub> BNO <sub>3</sub> | C <sub>20</sub> H <sub>28</sub> BNO <sub>4</sub> | C <sub>19</sub> H <sub>19</sub> NO         | C <sub>19</sub> H <sub>19</sub> NO         |
| Formula weight                                   | 431.36                                           | 357.24                                           | 277.35                                     | 277.35                                     |
| Temperature (K)                                  | 296(2)                                           | 296(2)                                           | 296(2)                                     | 296(2)                                     |
| Wave length [Å]                                  | 0.71073                                          | 0.71073                                          | 0.71073                                    | 0.71073                                    |
| Crystal system                                   | Triclinic                                        | Orthorhombic                                     | Monoclinic                                 | Monoclinic                                 |
| Space group                                      | P -1                                             | P b c a                                          | P 2 <sub>1</sub> /n                        | P2 <sub>1</sub> /n                         |
| a [Å]                                            | 8.867(3)                                         | 8.6631(4)                                        | 11.7963(7)                                 | 9.004(12)                                  |
| b [Å]                                            | 11.445(4)                                        | 13.5282(6)                                       | 8.2830(4)                                  | 9.504(11)                                  |
| c [Å]                                            | 12.457(4)                                        | 35.3230(15)                                      | 15.9743(10)                                | 18.11(2)                                   |
| α [°]                                            | 102.292                                          | 90                                               | 90                                         | 90                                         |
| β [°]                                            | 95.249                                           | 90                                               | 105.775(2)                                 | 94.20                                      |
| γ [°]                                            | 98.197(11)°.                                     | 90                                               | 90                                         | 90                                         |
| Volume [Å <sup>3</sup> ]                         | 1212.8(6)                                        | 4139.7(3)                                        | 1502.04(15)                                | 1546(3)                                    |
| Z                                                | 2                                                | 8                                                | 4                                          | 4                                          |
| Density<br>(calculated)<br>[mg/m <sup>3</sup> ]  | 1.181                                            | 1.146                                            | 1.226                                      | 1.192                                      |
| Absorption<br>coefficient<br>[mm <sup>-1</sup> ] | 0.075                                            | 0.078                                            | 0.075                                      | 0.073                                      |
| <i>F</i> (000)                                   | 464                                              | 1536                                             | 592                                        | 592                                        |
| Crystal size [mm <sup>3</sup> ]                  | 0.200 x 0.180 x<br>0.150                         | 0.350 x 0.250 x<br>0.150                         | 0.250 x 0.150 x<br>0.100                   | 0.12 x 0.090 x<br>0.080                    |
| Theta range for<br>data collection               | 2.339 to 24.998°.                                | 2.306 to 25.497°.                                | 1.919 to 25.499°.                          | 2.421 to 28.292                            |
| Limiting indices                                 | -10<=h<=10, -<br>13<=k<=13, -<br>14<=l<=14       | -10<=h<=10, -<br>15<=k<=16, -<br>42<=l<=42       | -14<=h<=14, -<br>10<=k<=10, -<br>19<=l<=19 | -11<=h<=12, -<br>12<=k<=12, -<br>24<=l<=24 |
| Reflections<br>collected / unique                | 17144/4267 [R(int)<br>= 0.1311]                  | 72526/ 3861 [R(int)<br>= 0.0881]                 | 26754/2795 [R(int)<br>= 0.0806]            | 36315/3822<br>[R(int) =<br>0.0690]         |

|                                  |                                  |                                  |                                  |                                  |
|----------------------------------|----------------------------------|----------------------------------|----------------------------------|----------------------------------|
| Goodness-of-fit on $F^2$         | 1.010                            | 1.122                            | 1.042                            | 1.044                            |
| Final R indices<br>[I>2sigma(I)] | $R_1 = 0.0633$ , $wR_2 = 0.1336$ | $R_1 = 0.0677$ , $wR_2 = 0.1685$ | $R_1 = 0.0605$ , $wR_2 = 0.1654$ | $R_1 = 0.0555$ , $wR_2 = 0.1360$ |
| R indices (all data)             | $R_1 = 0.1324$ , $wR_2 = 0.1658$ | $R_1 = 0.0885$ , $wR_2 = 0.1817$ | $R_1 = 0.0816$ , $wR_2 = 0.1937$ | $R_1 = 0.0990$ , $wR_2 = 0.1587$ |
| <i>CCDC</i>                      | 2266989                          | 2266990                          | 2266922                          | 2266991                          |

## 5. NMR spectra of compounds

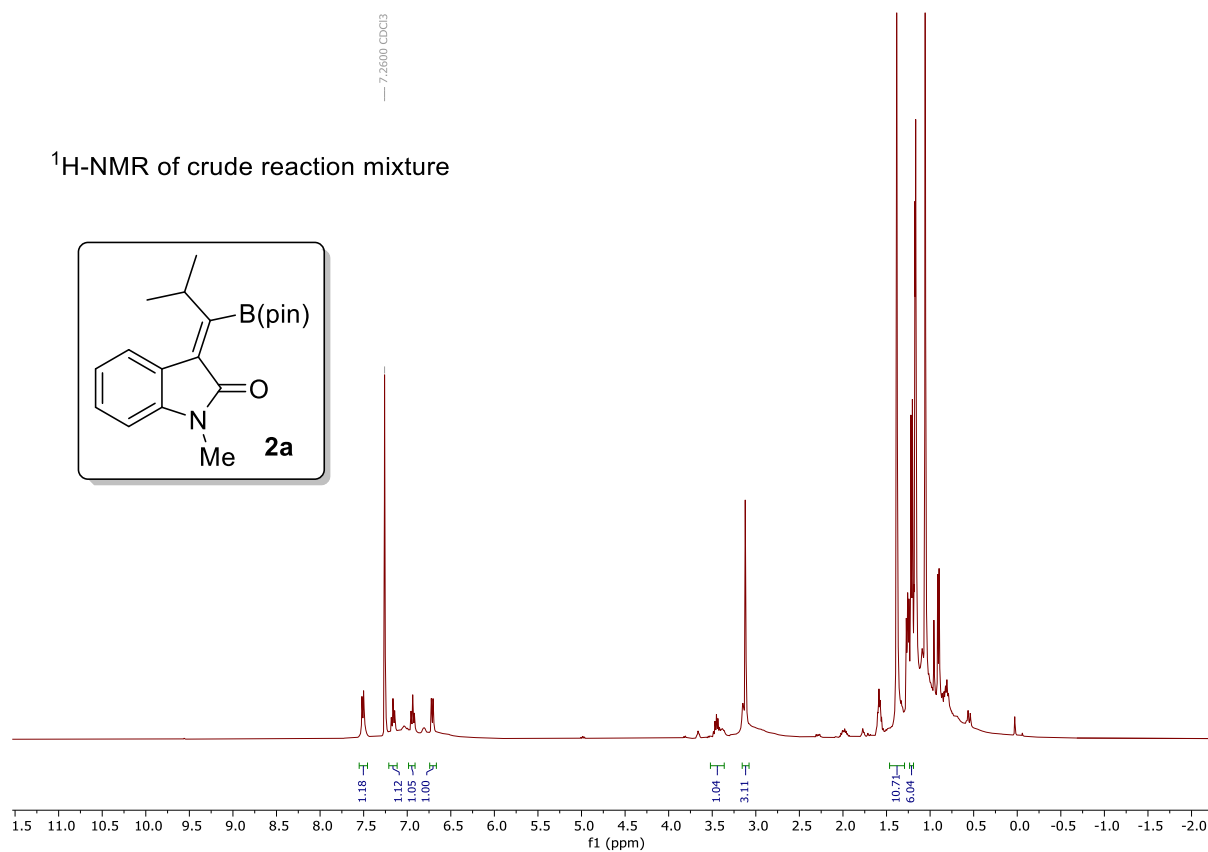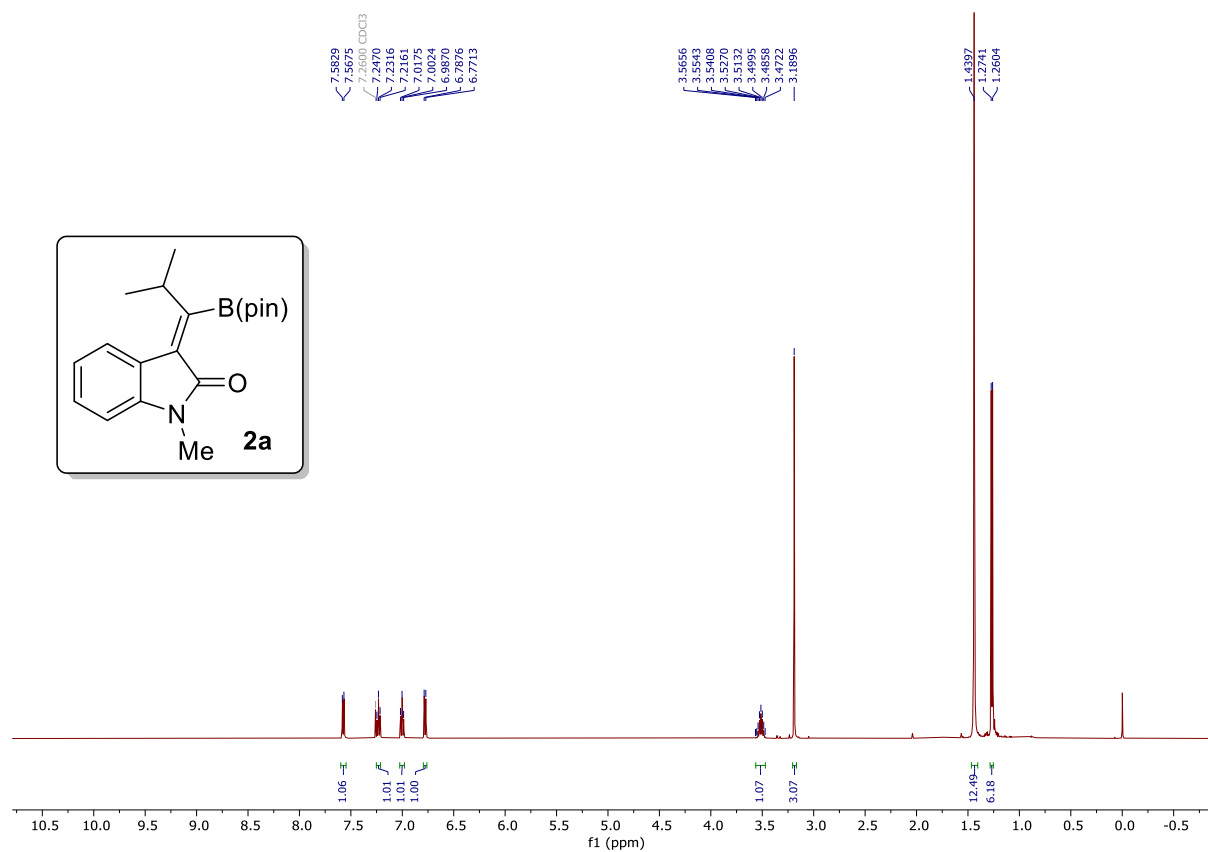

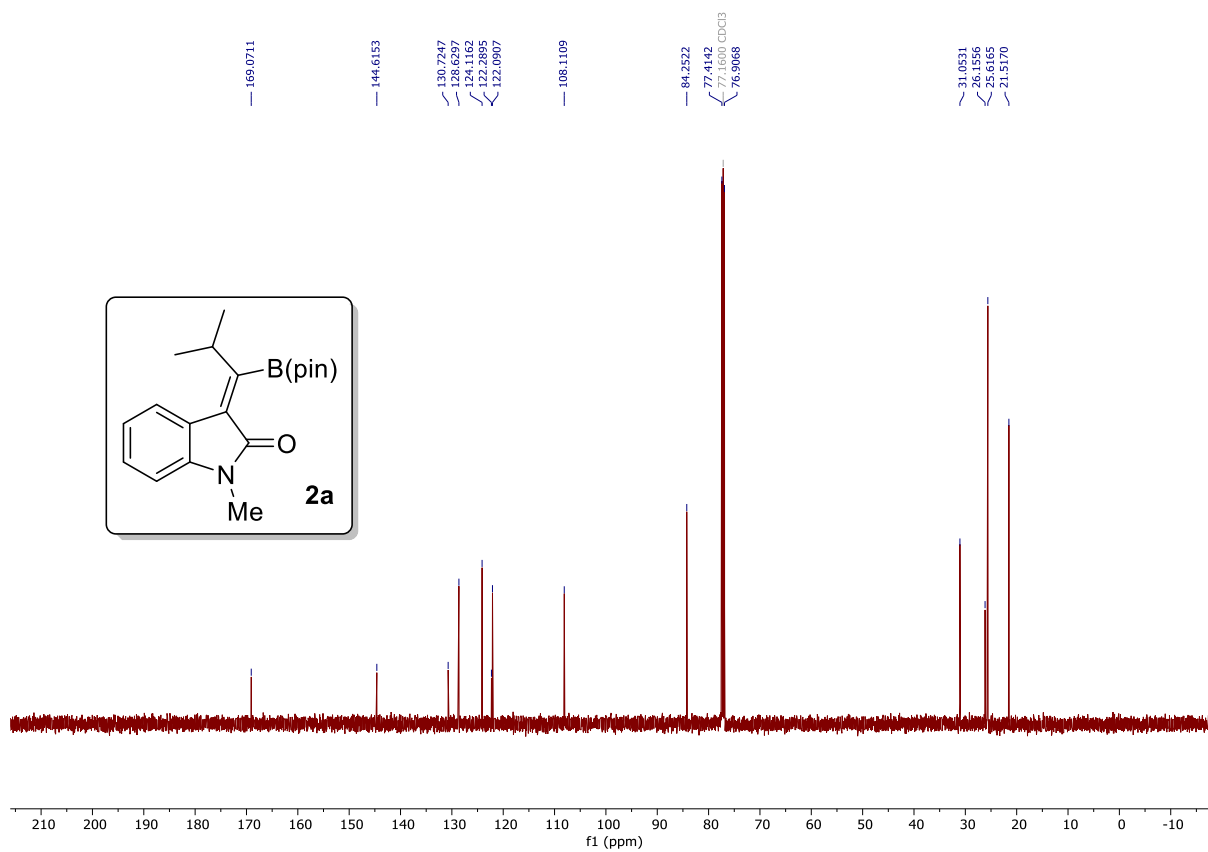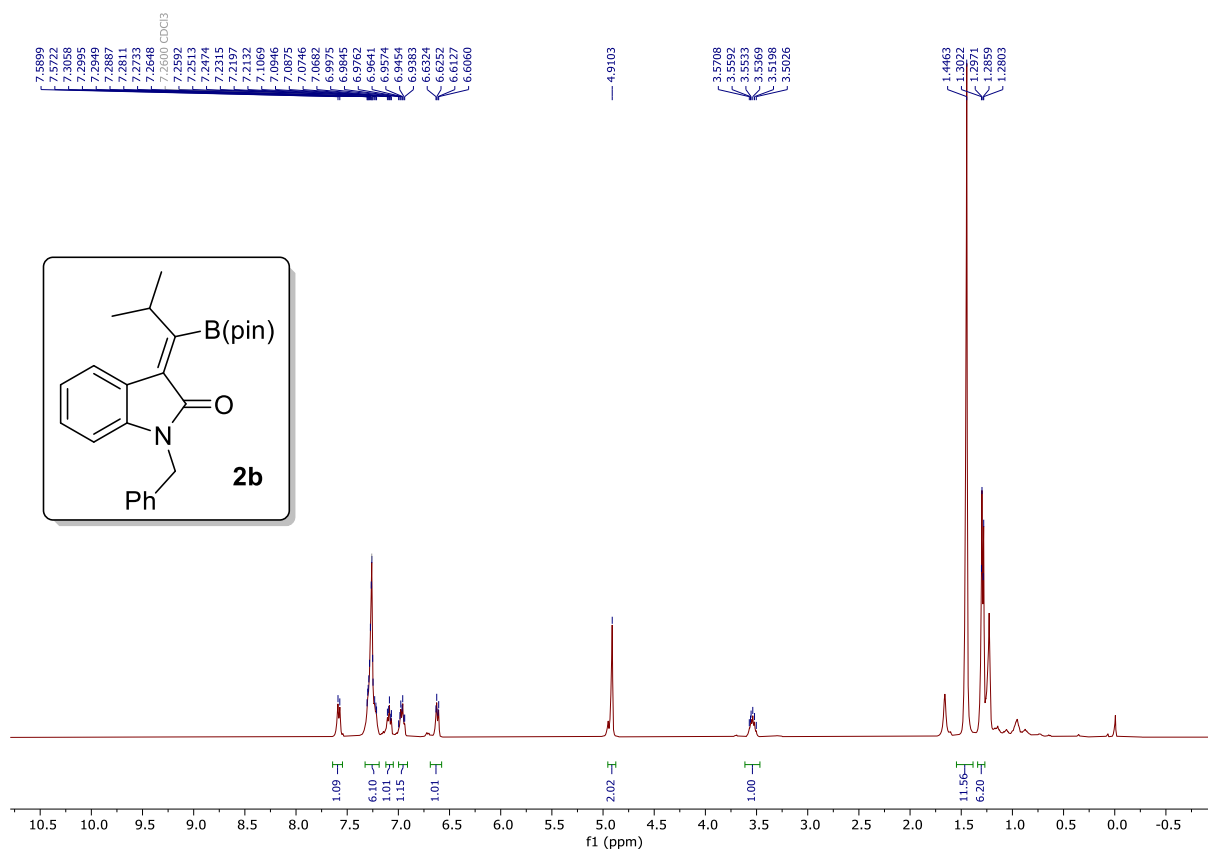



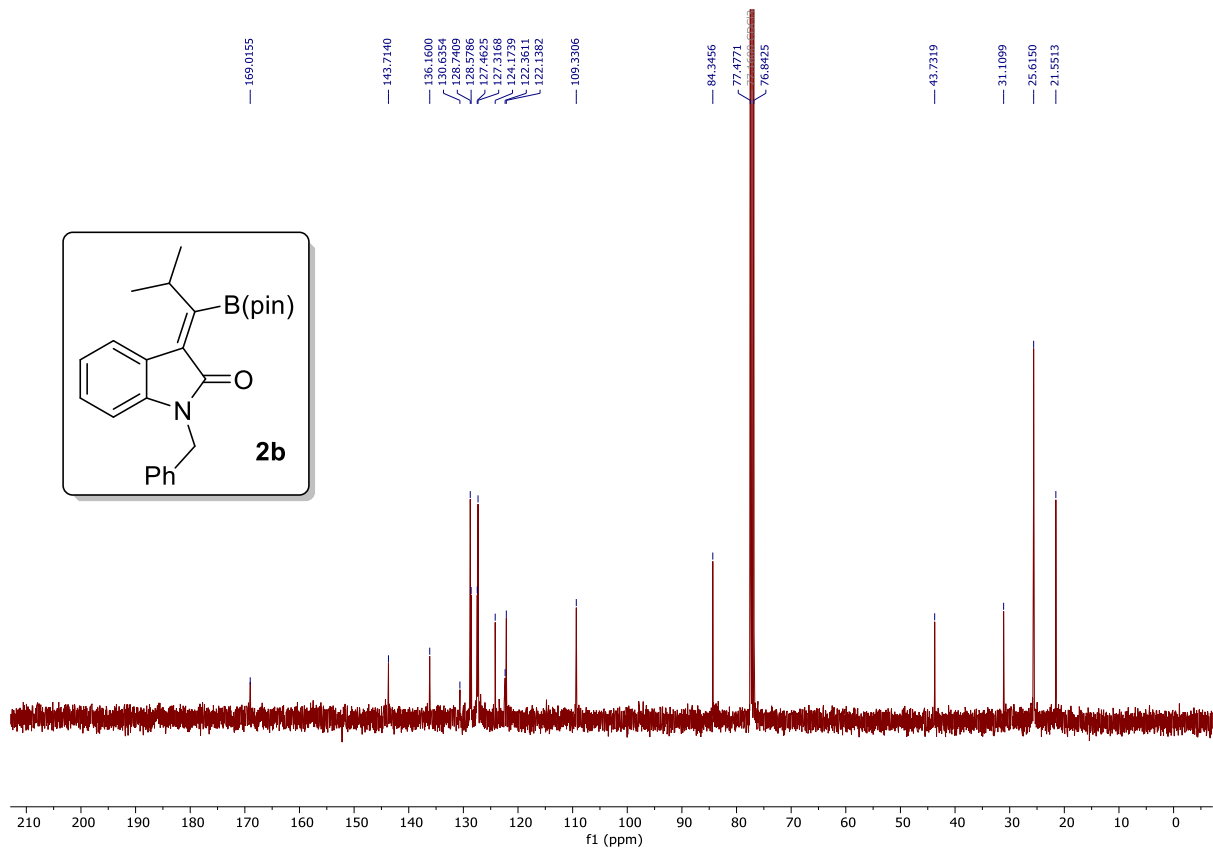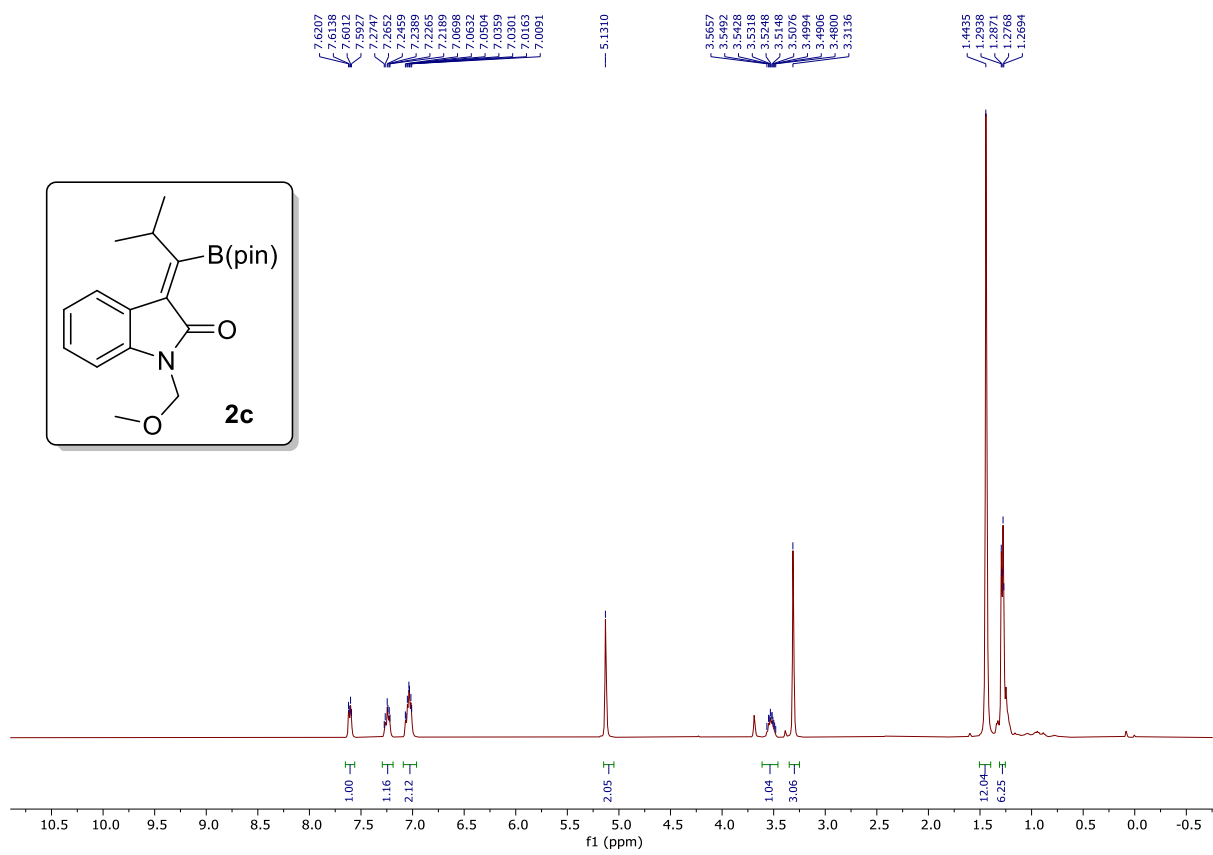

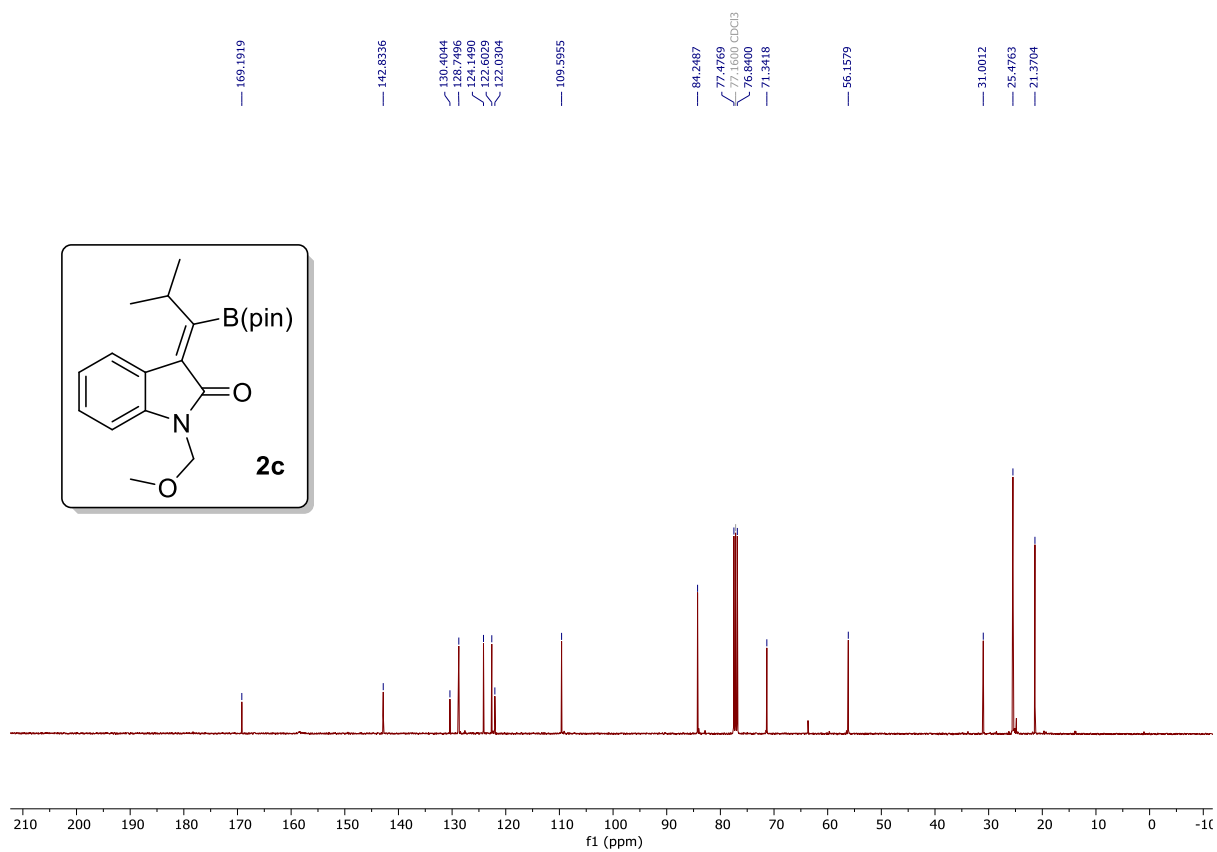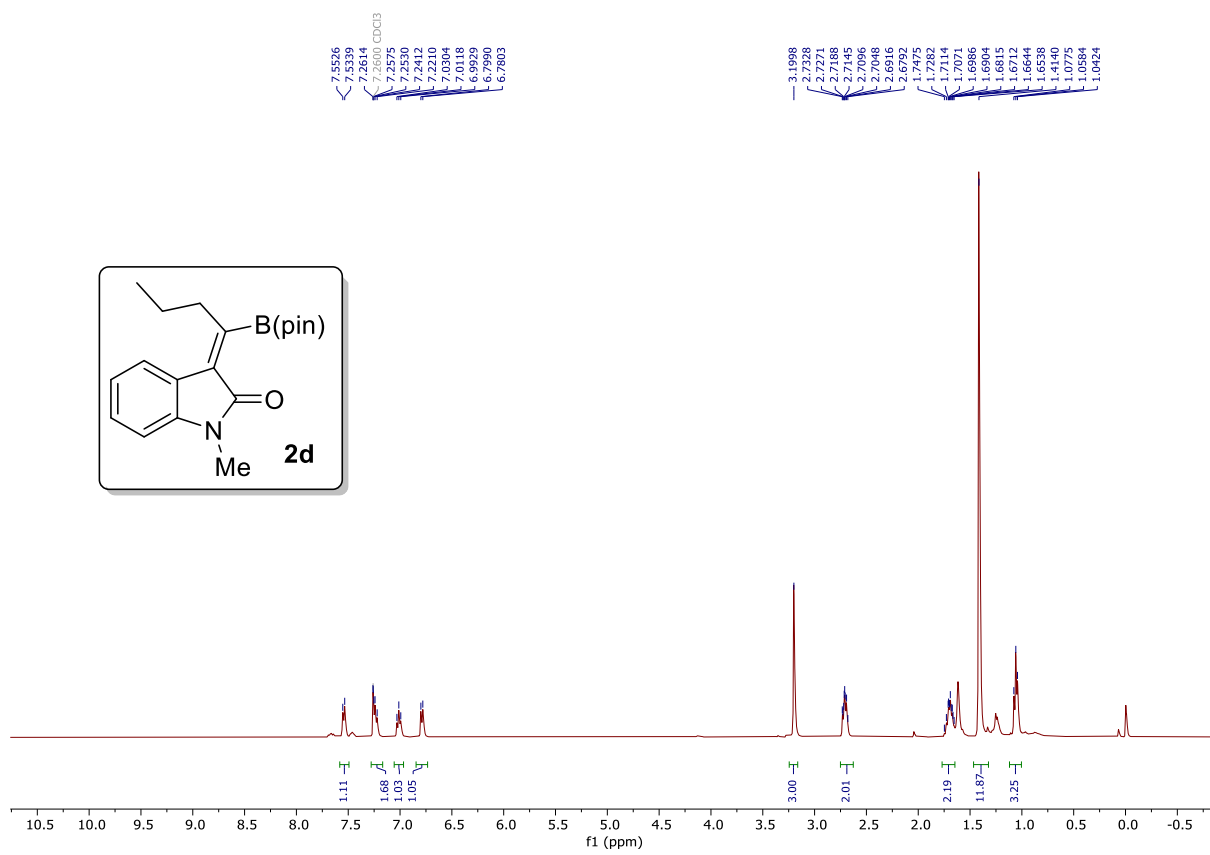

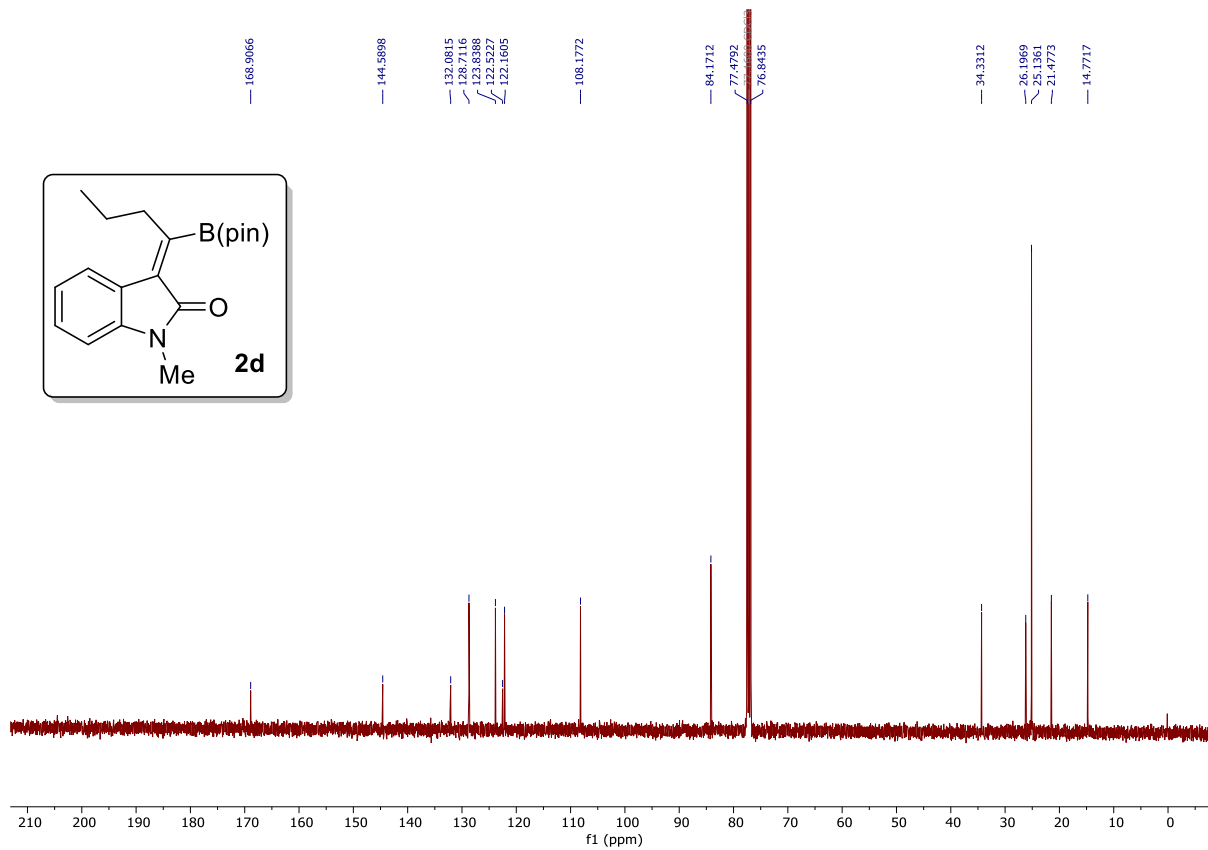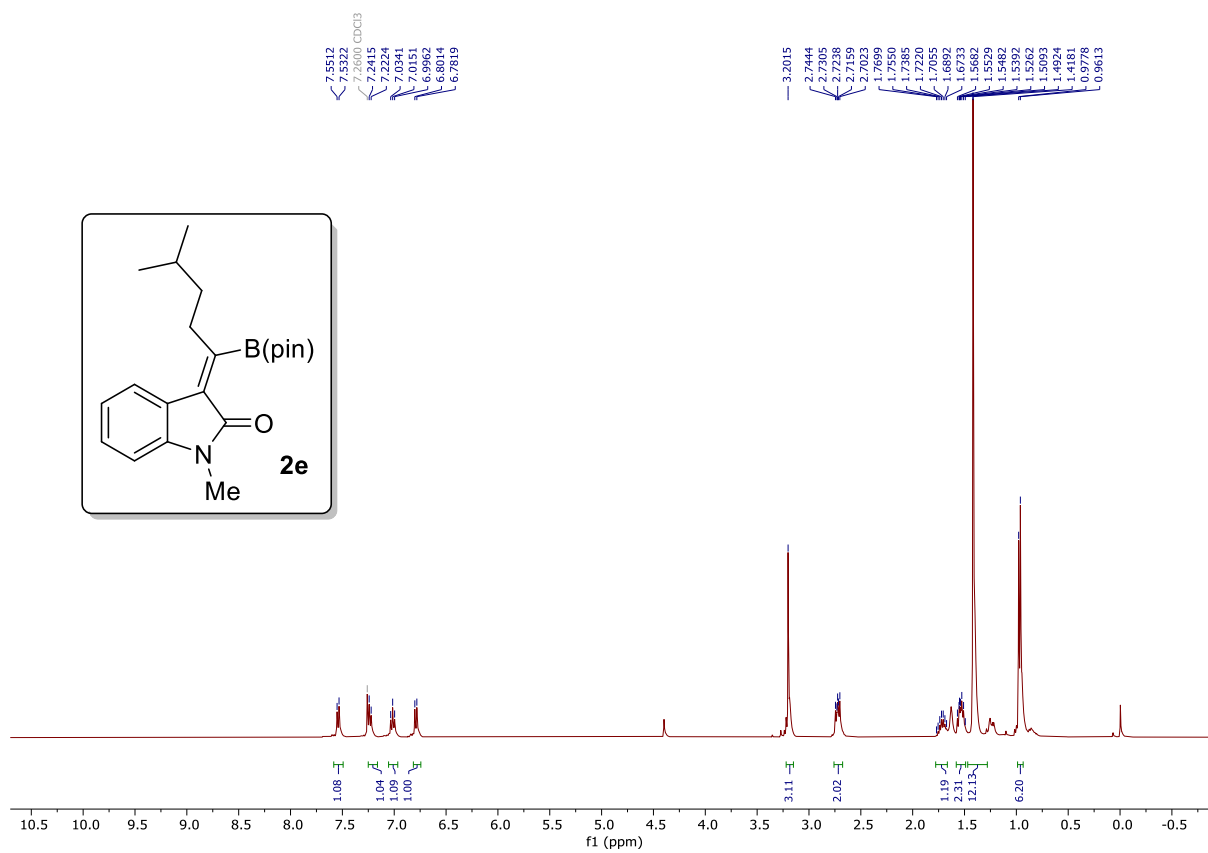

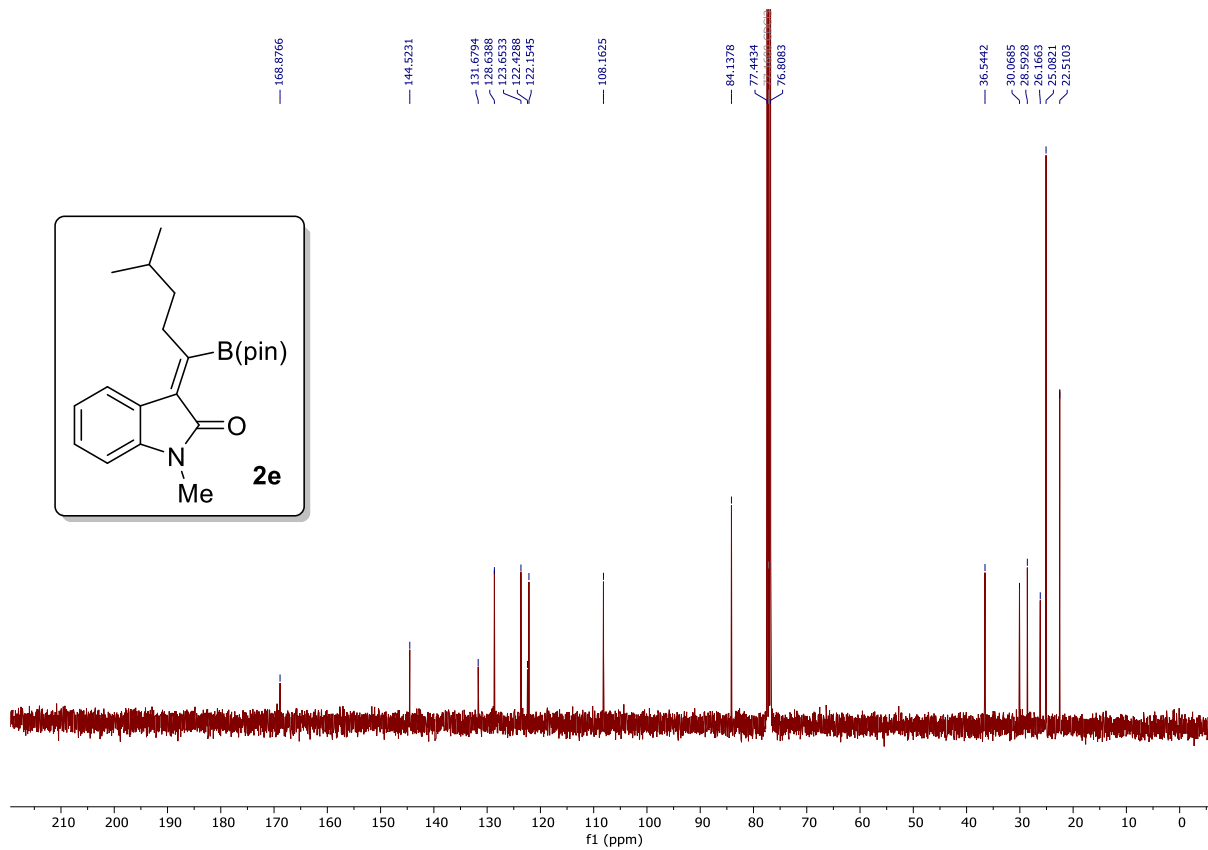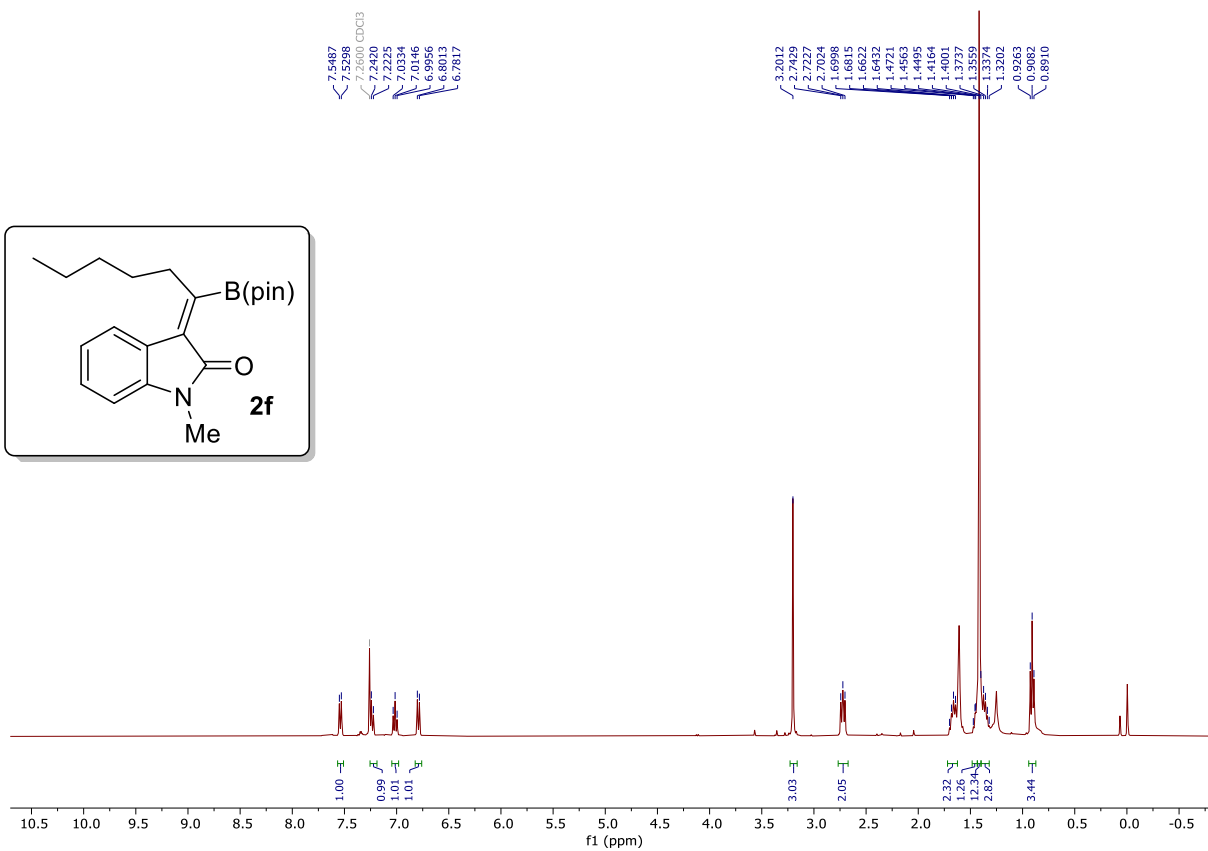

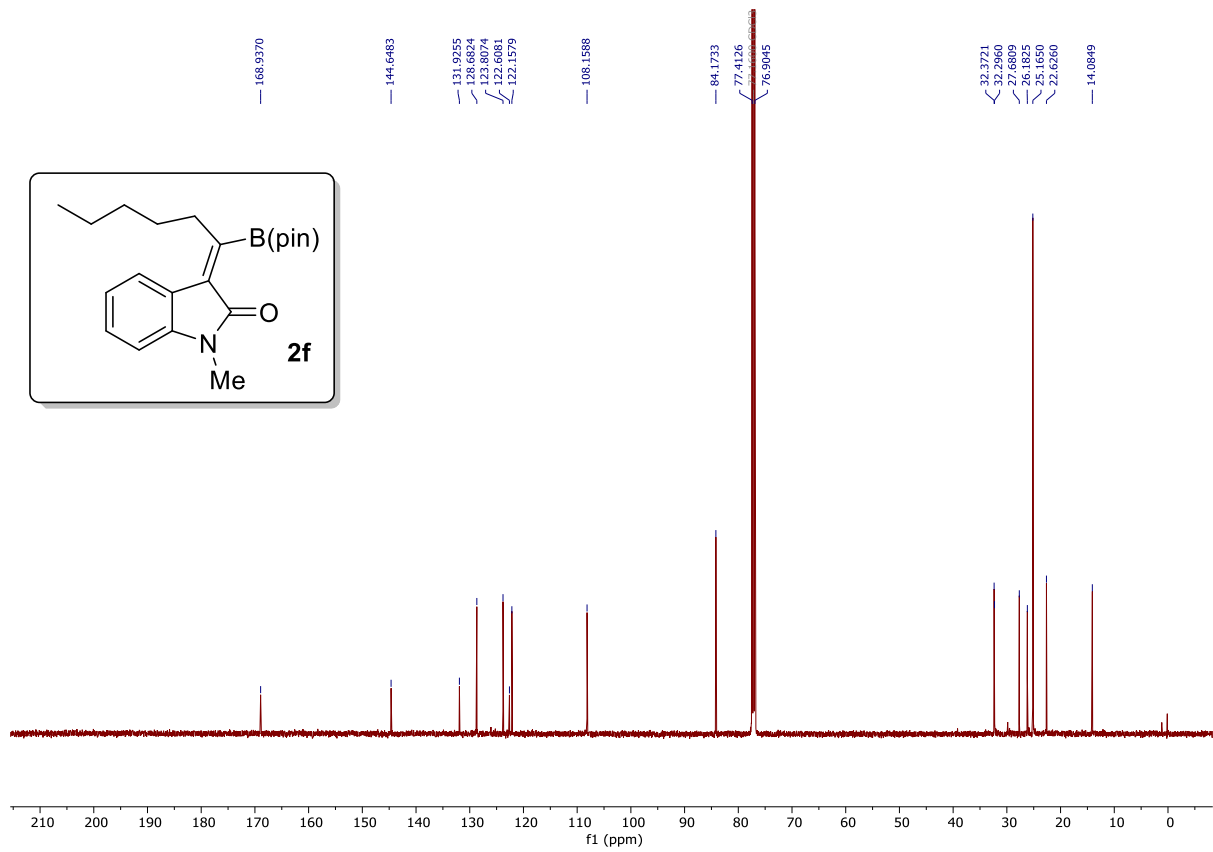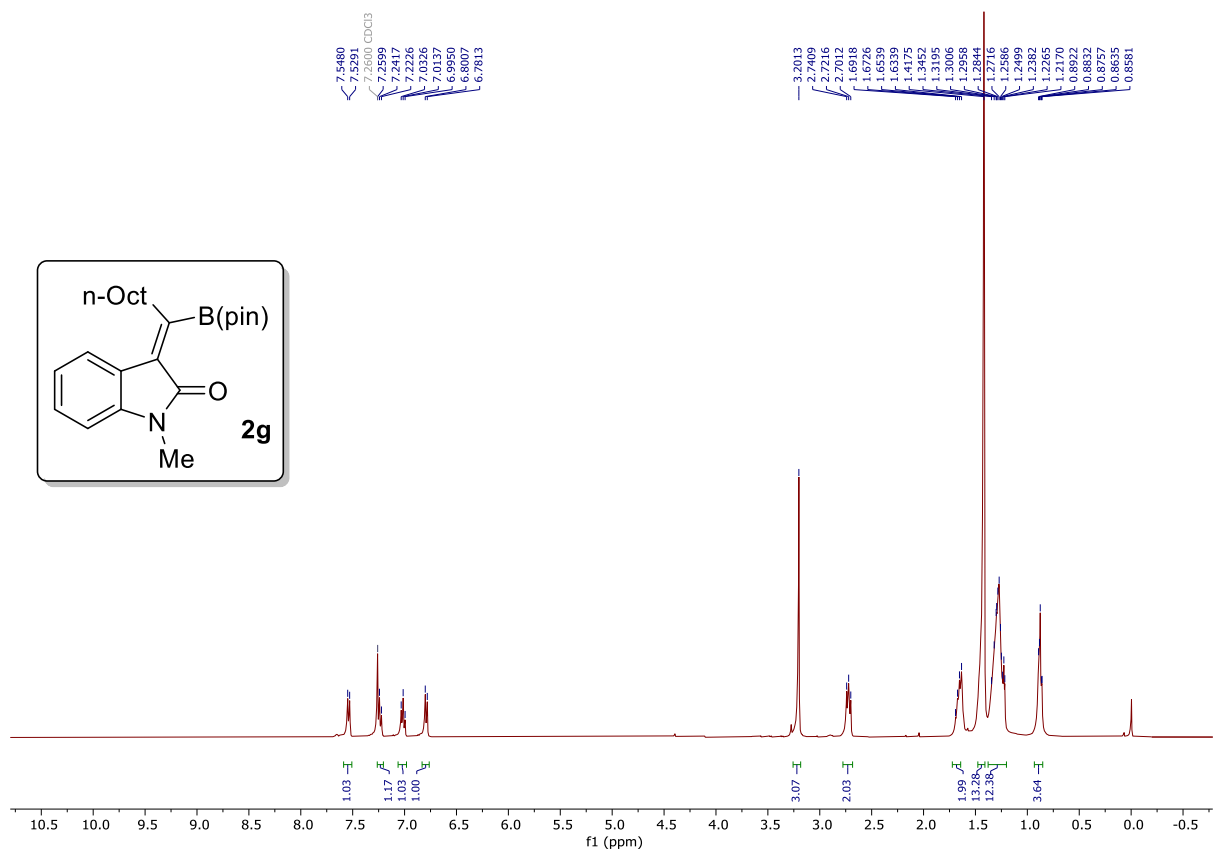

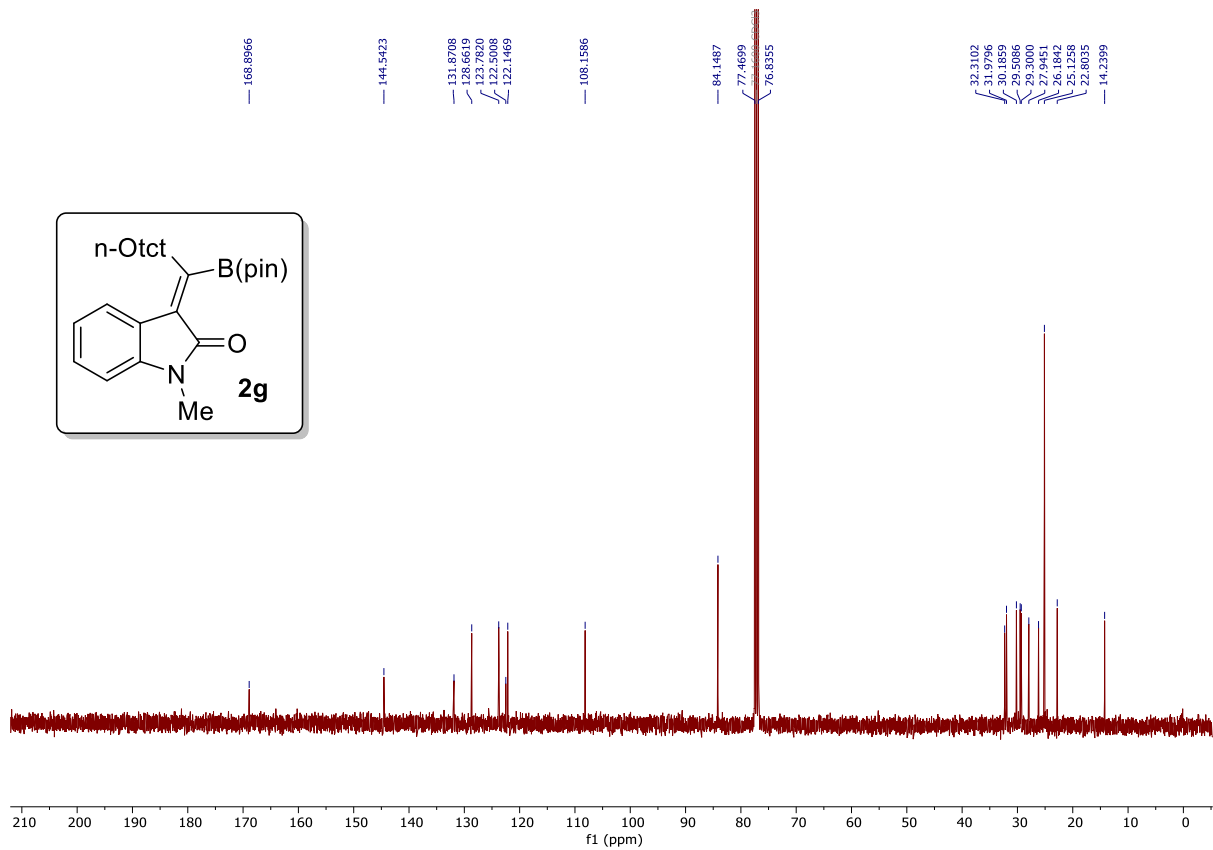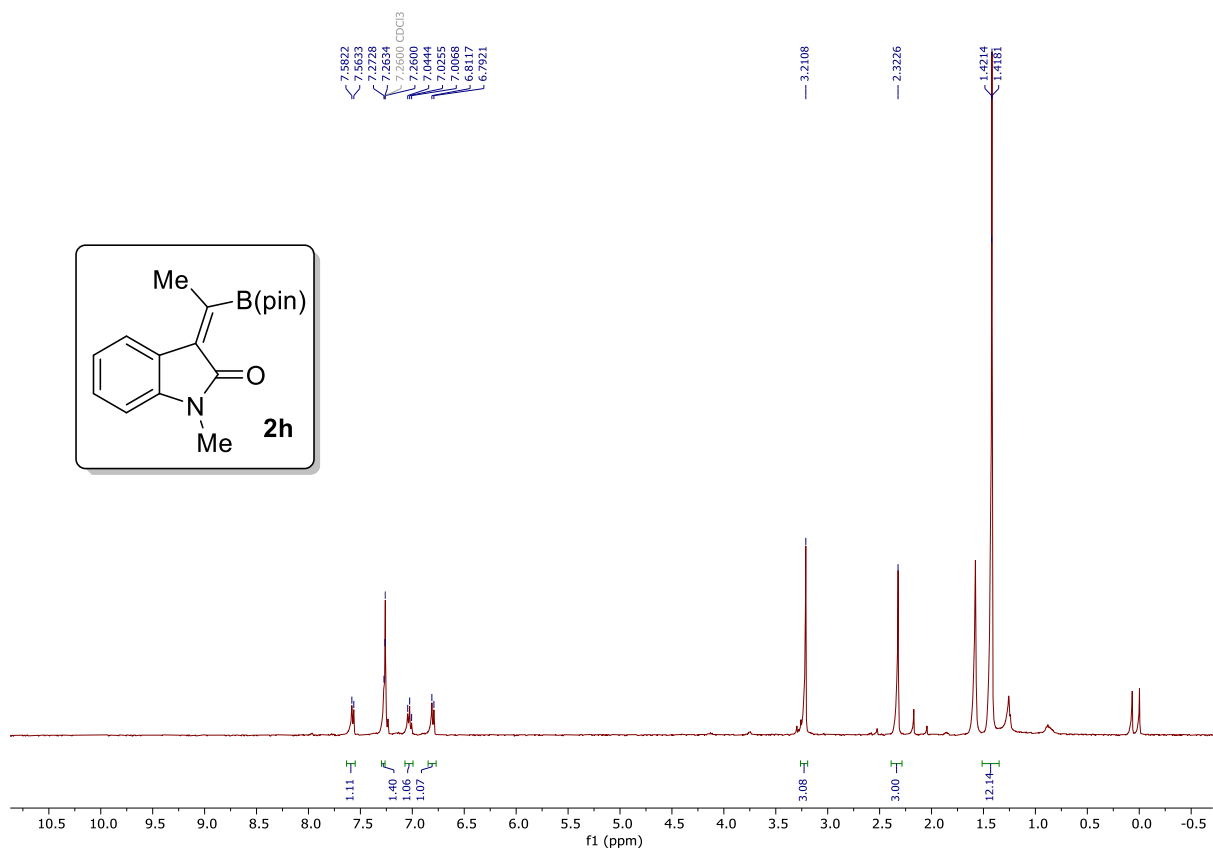

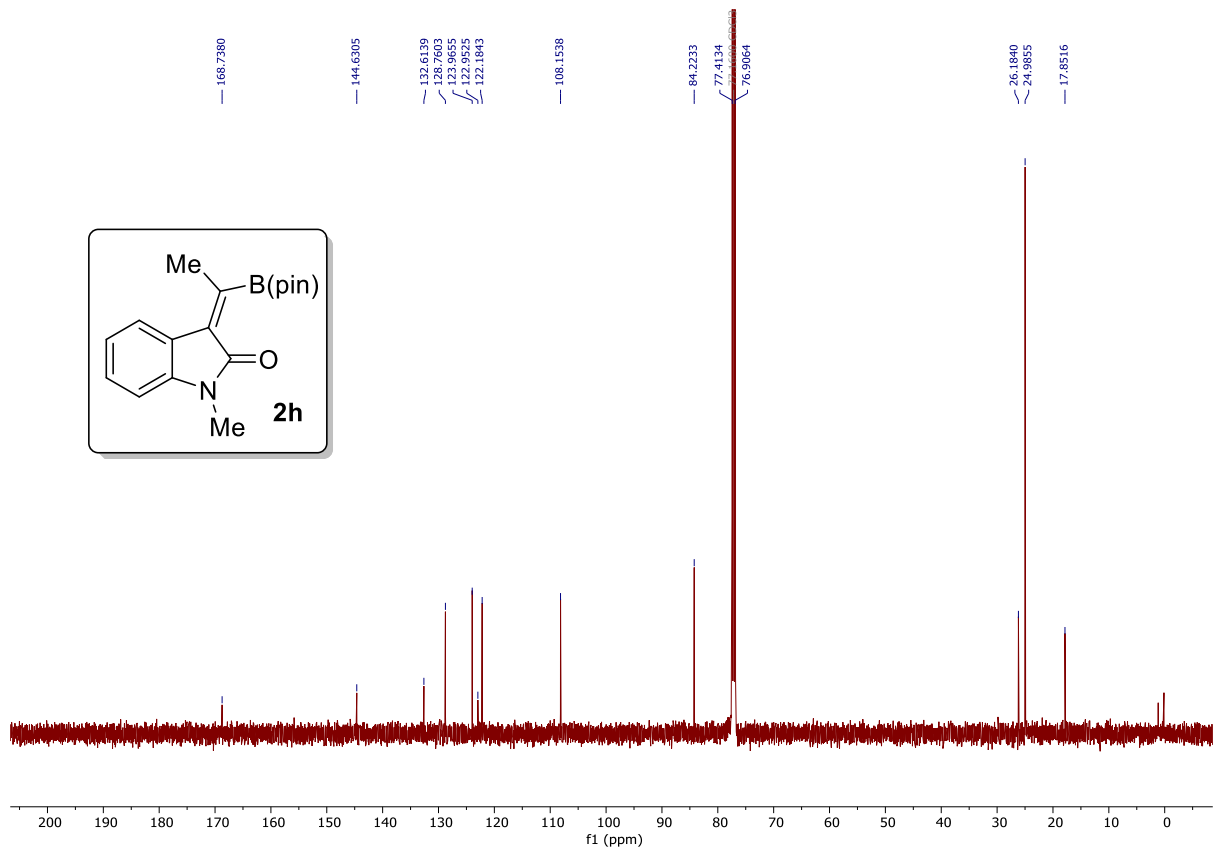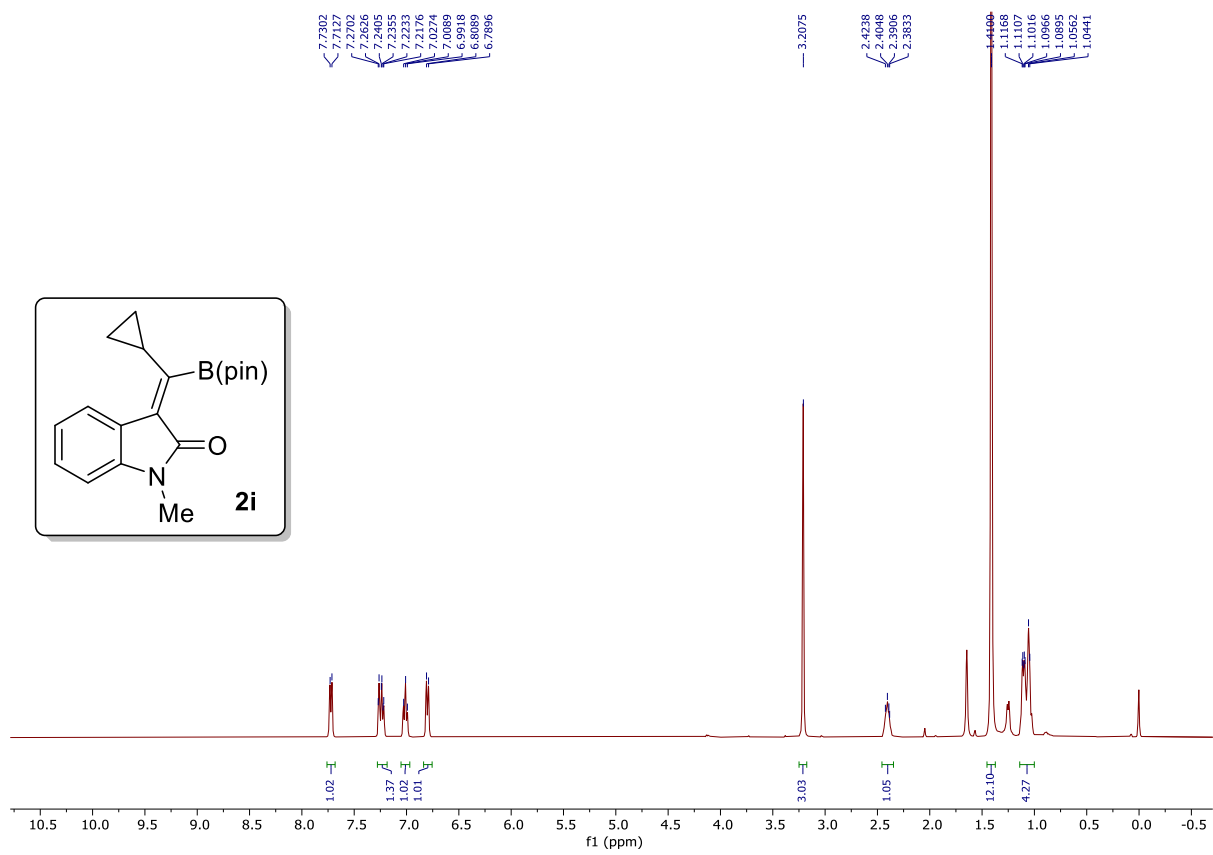

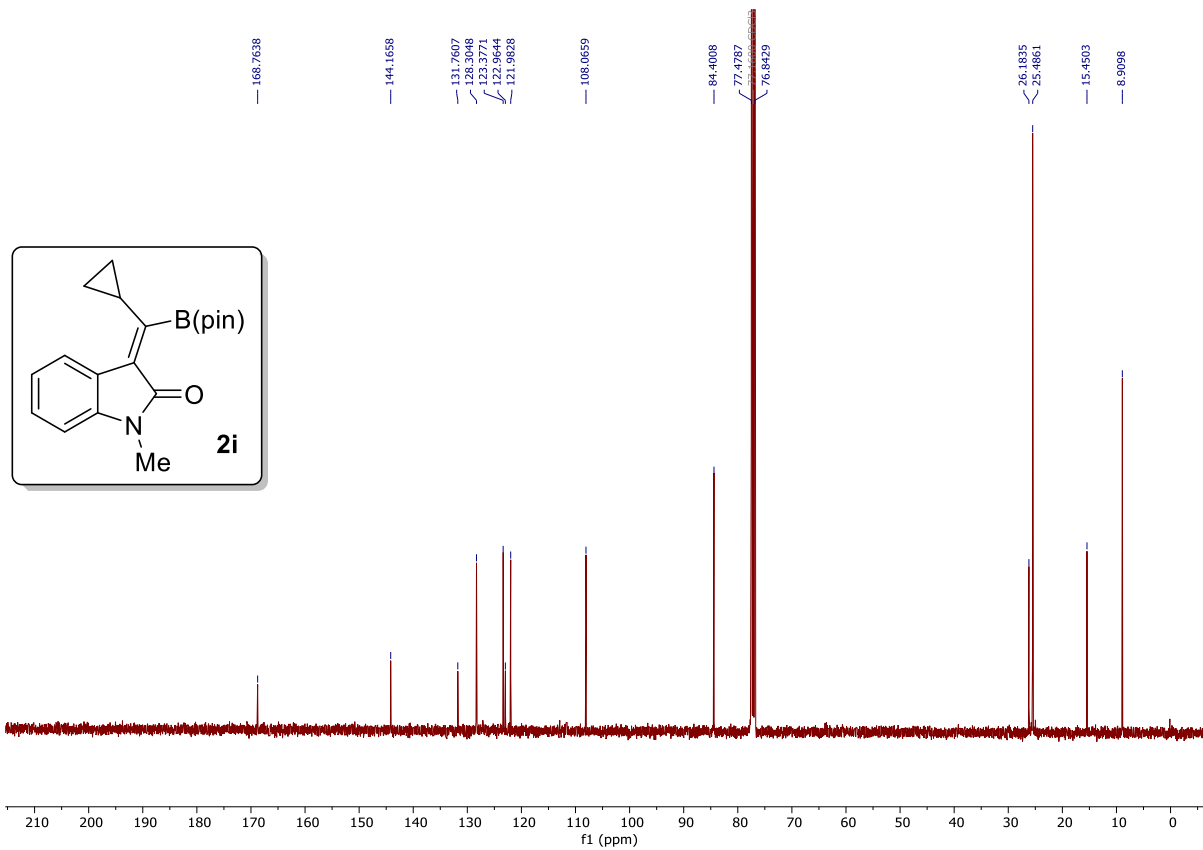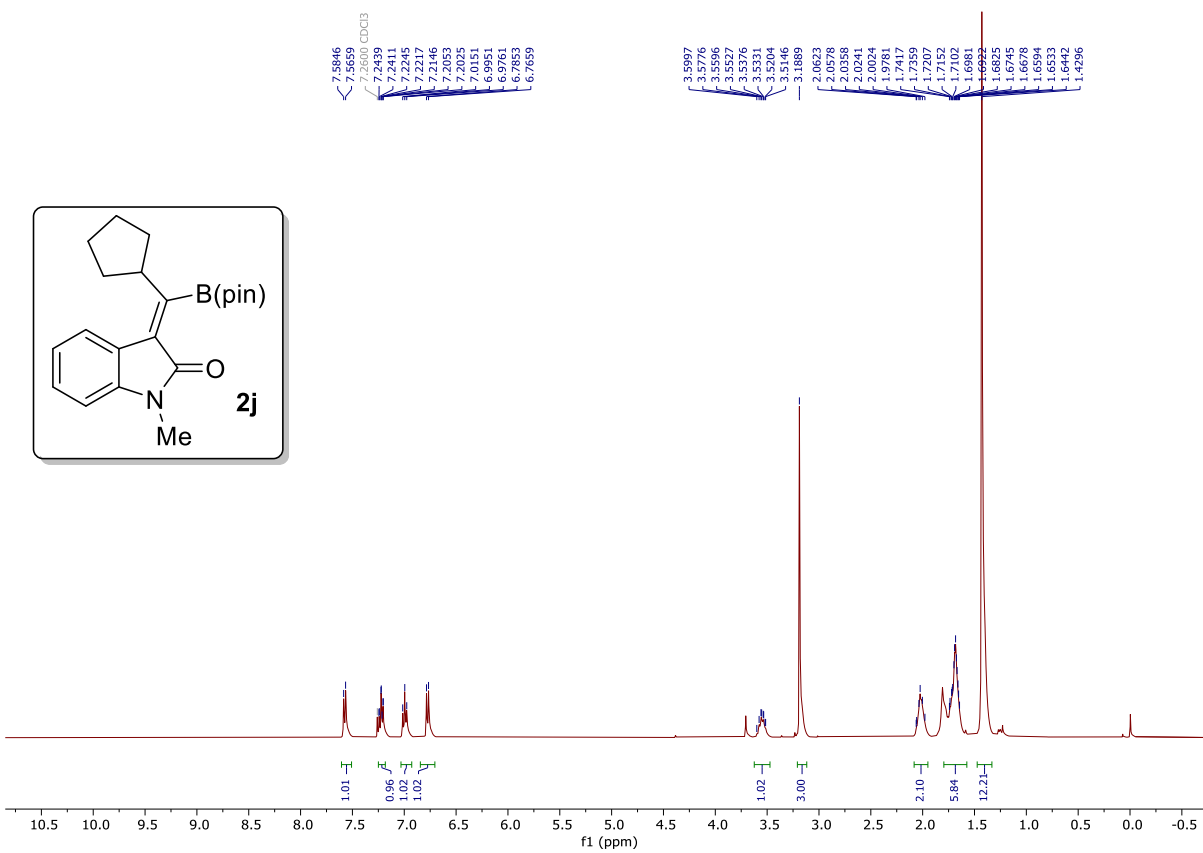



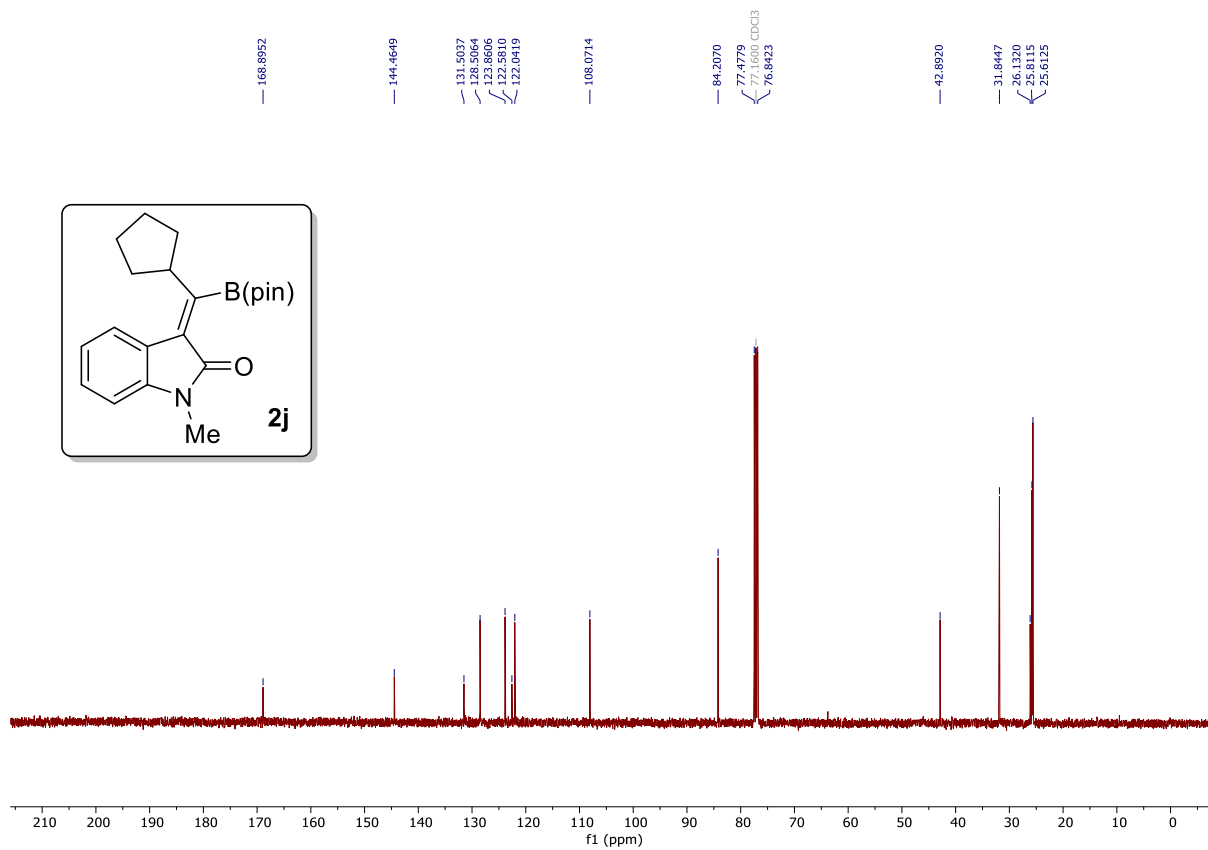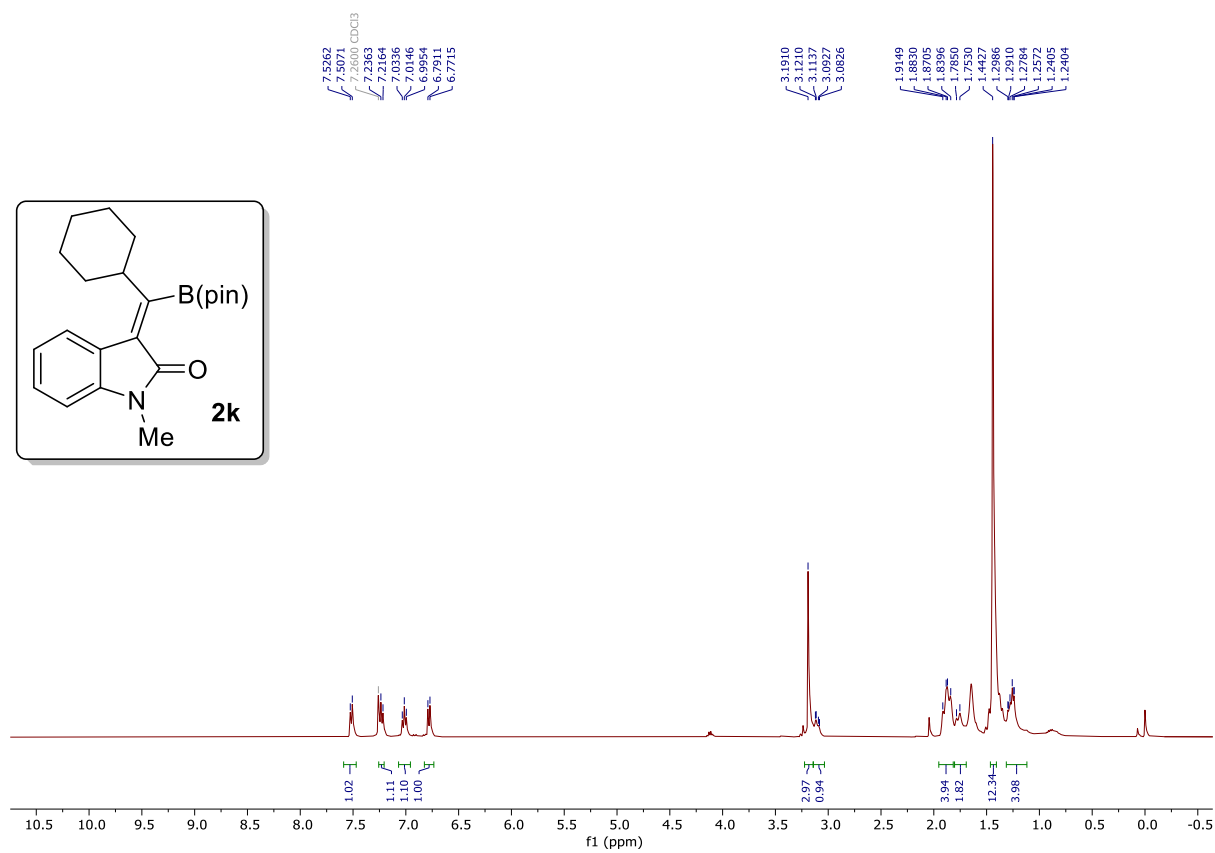



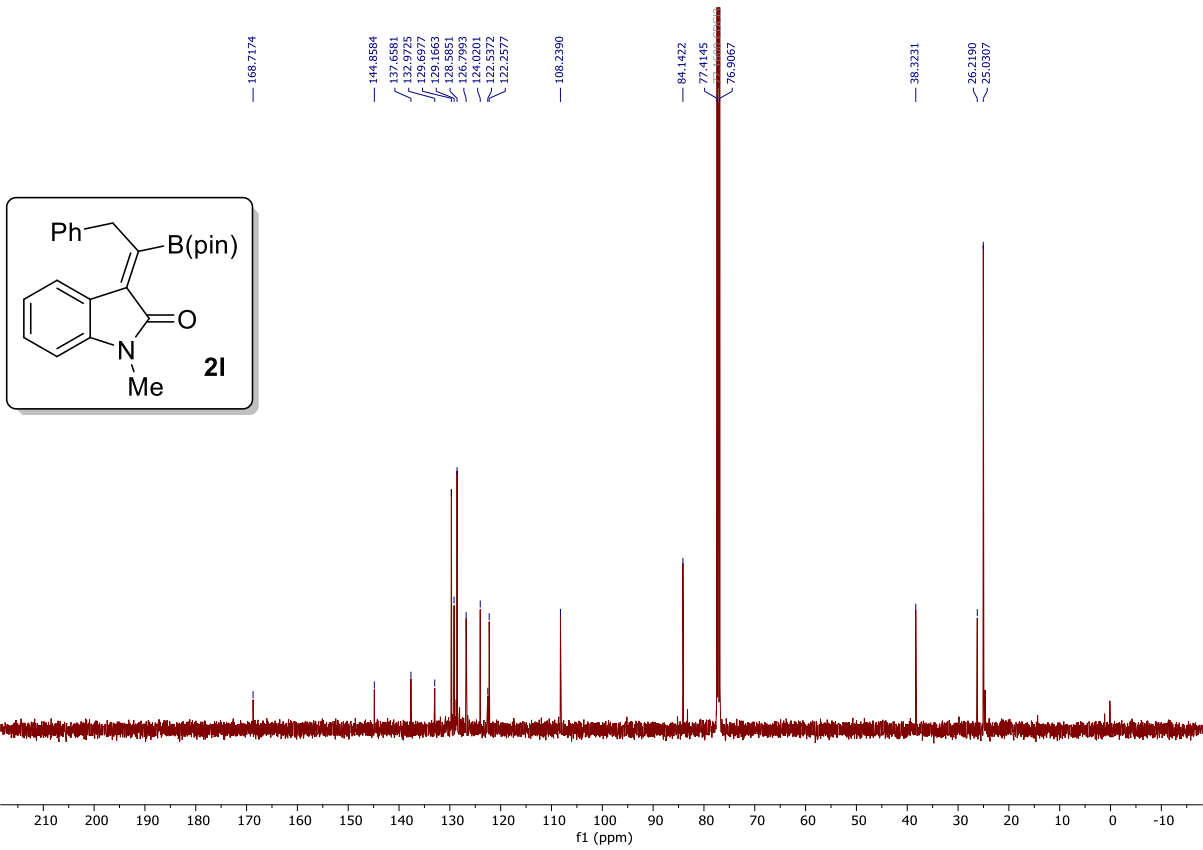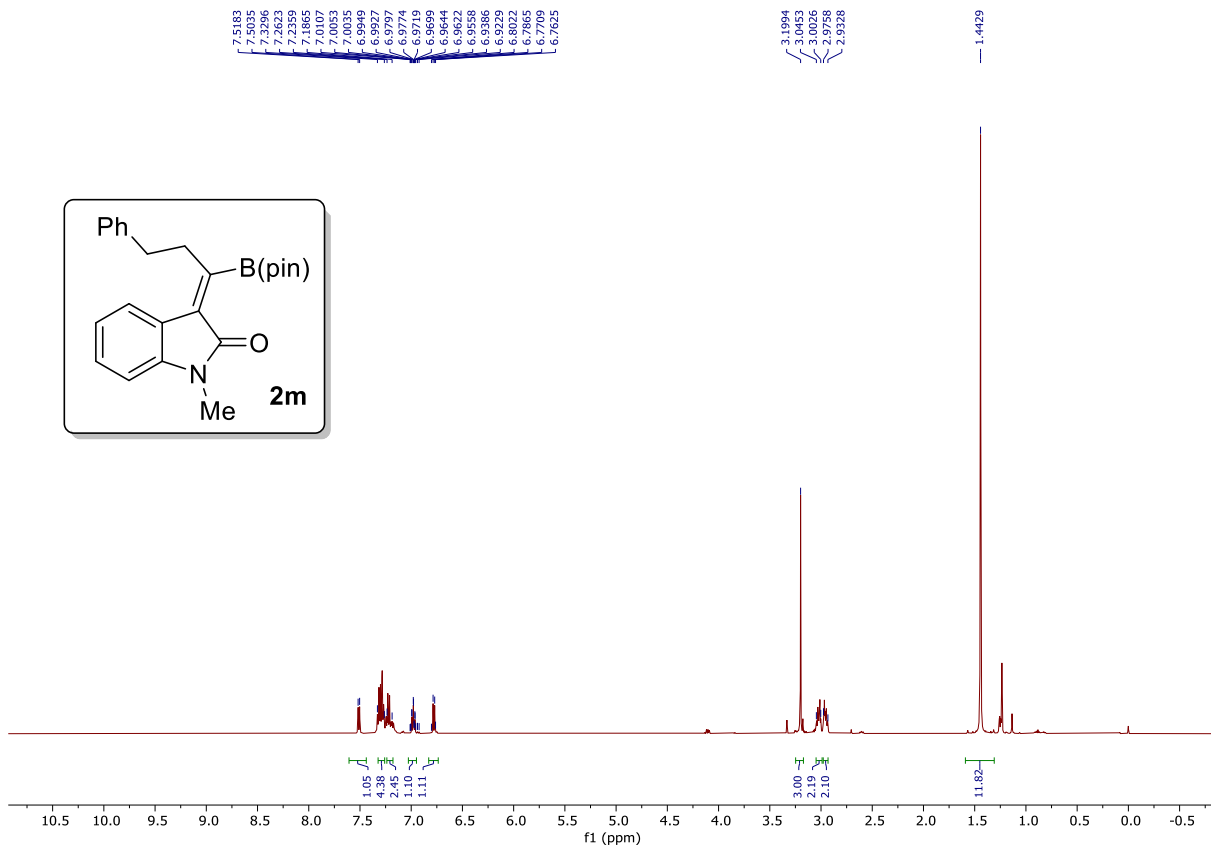

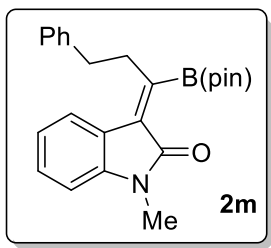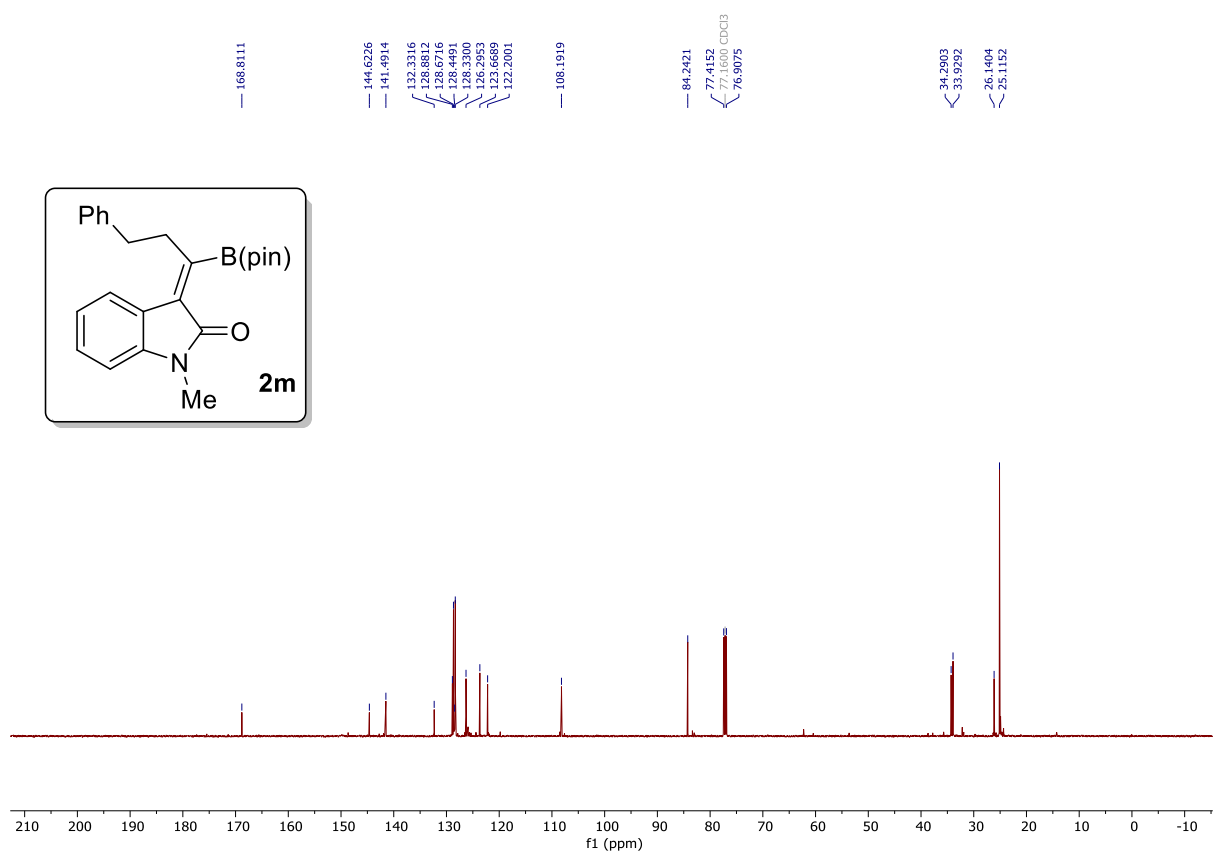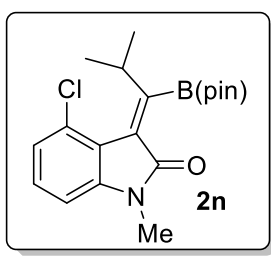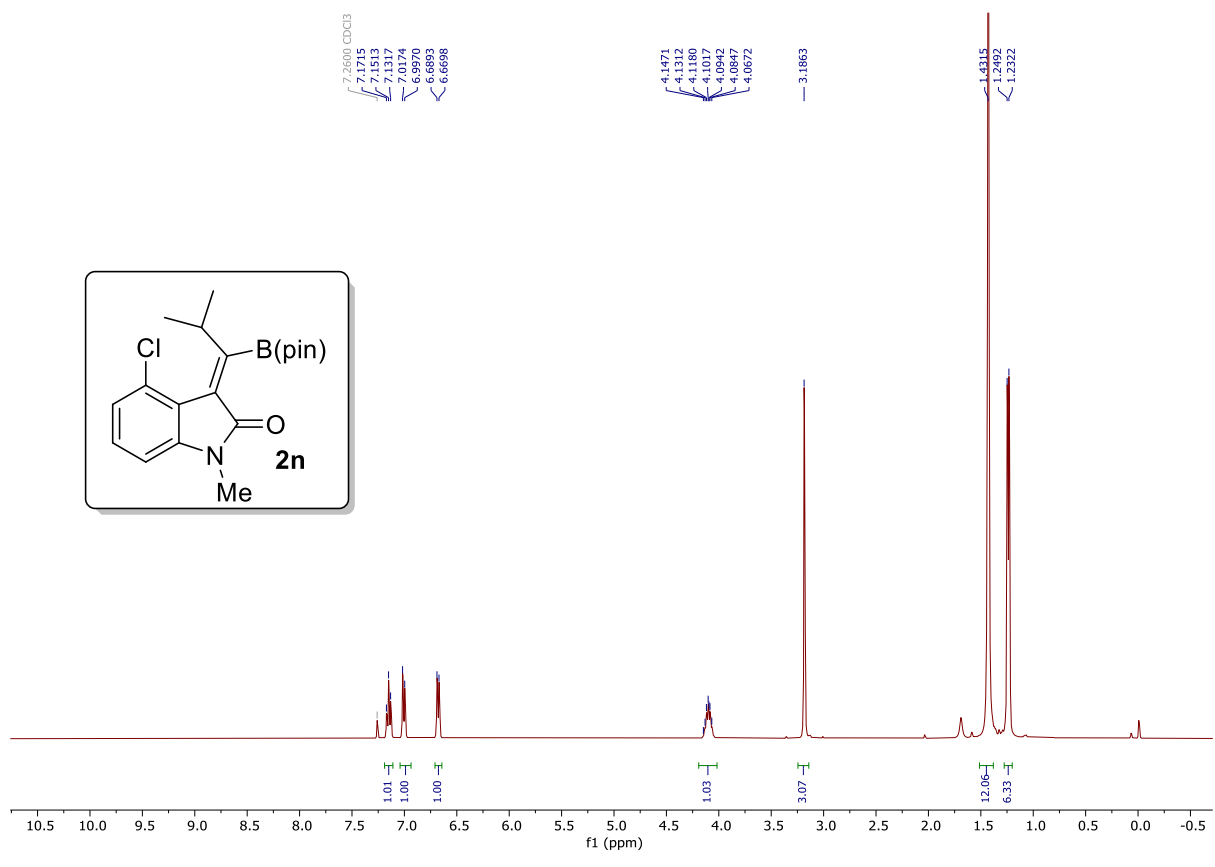

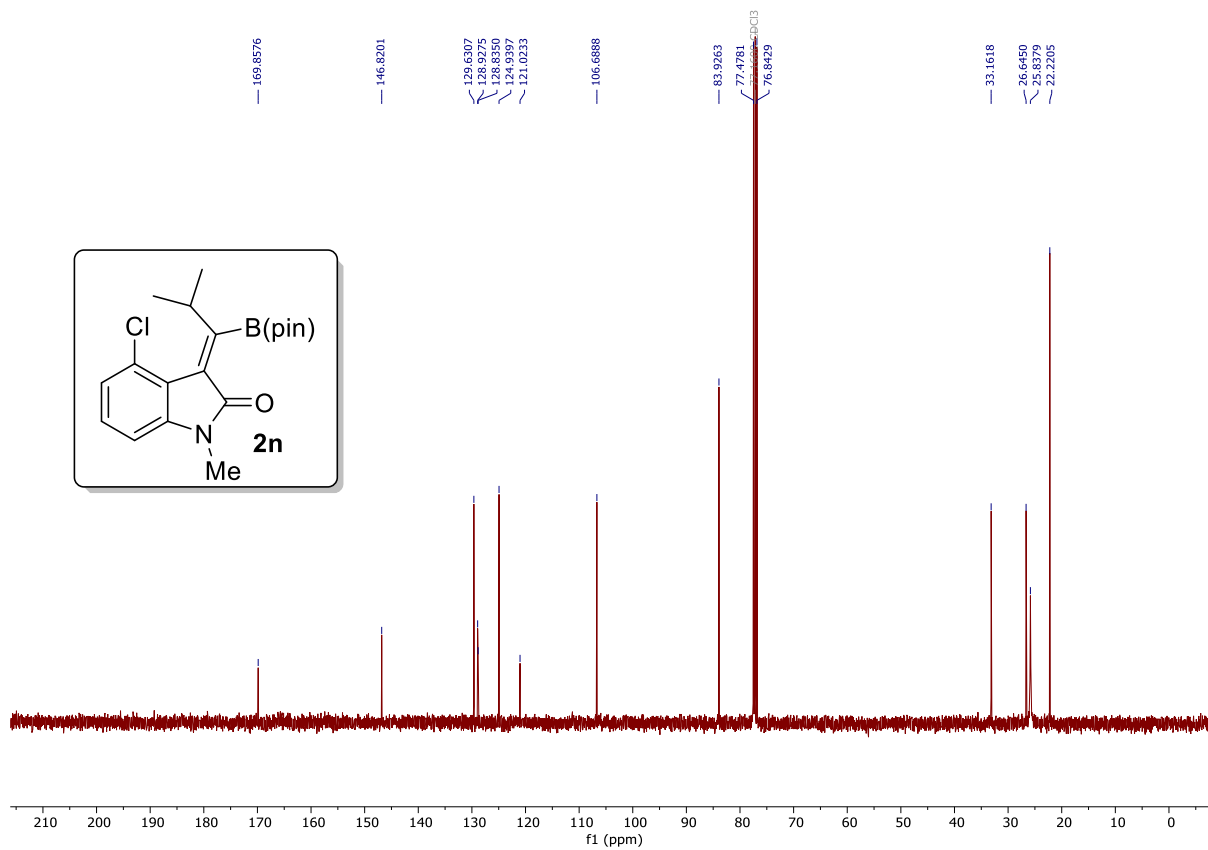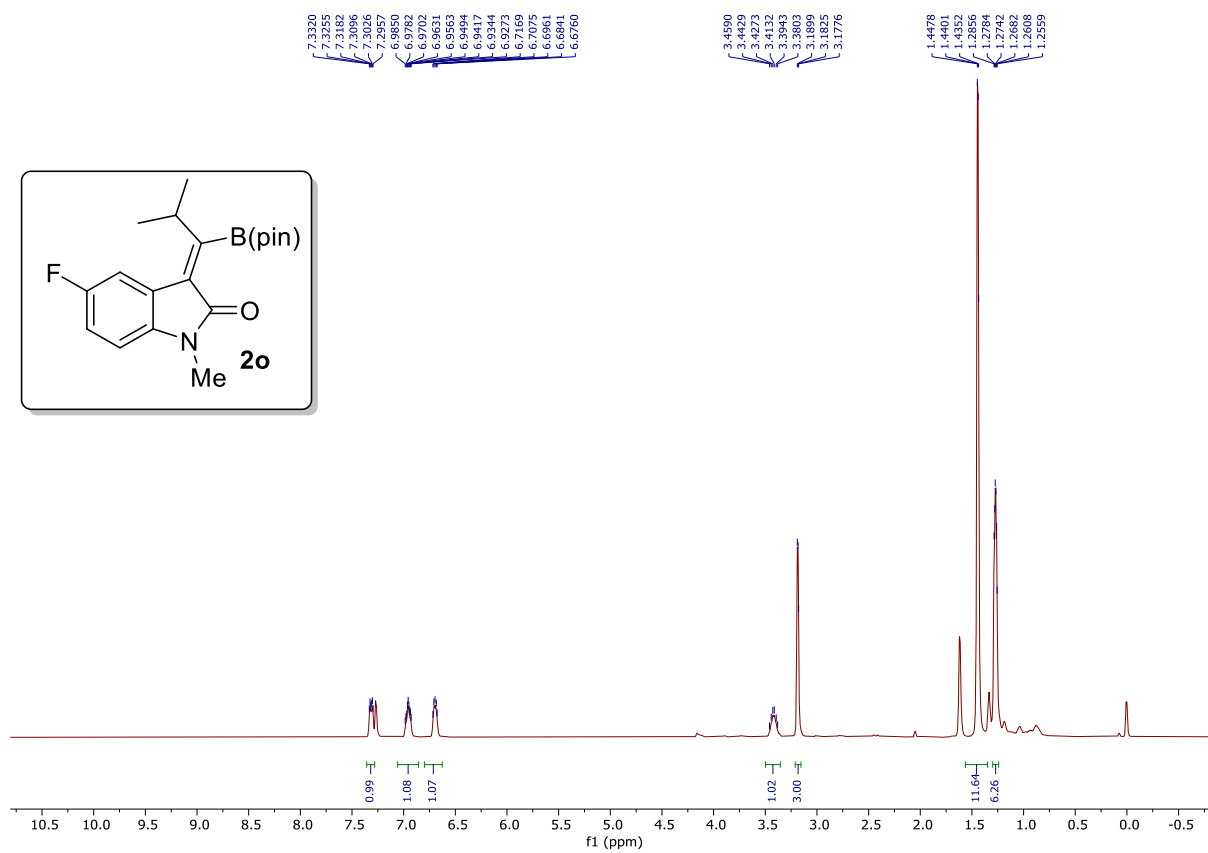

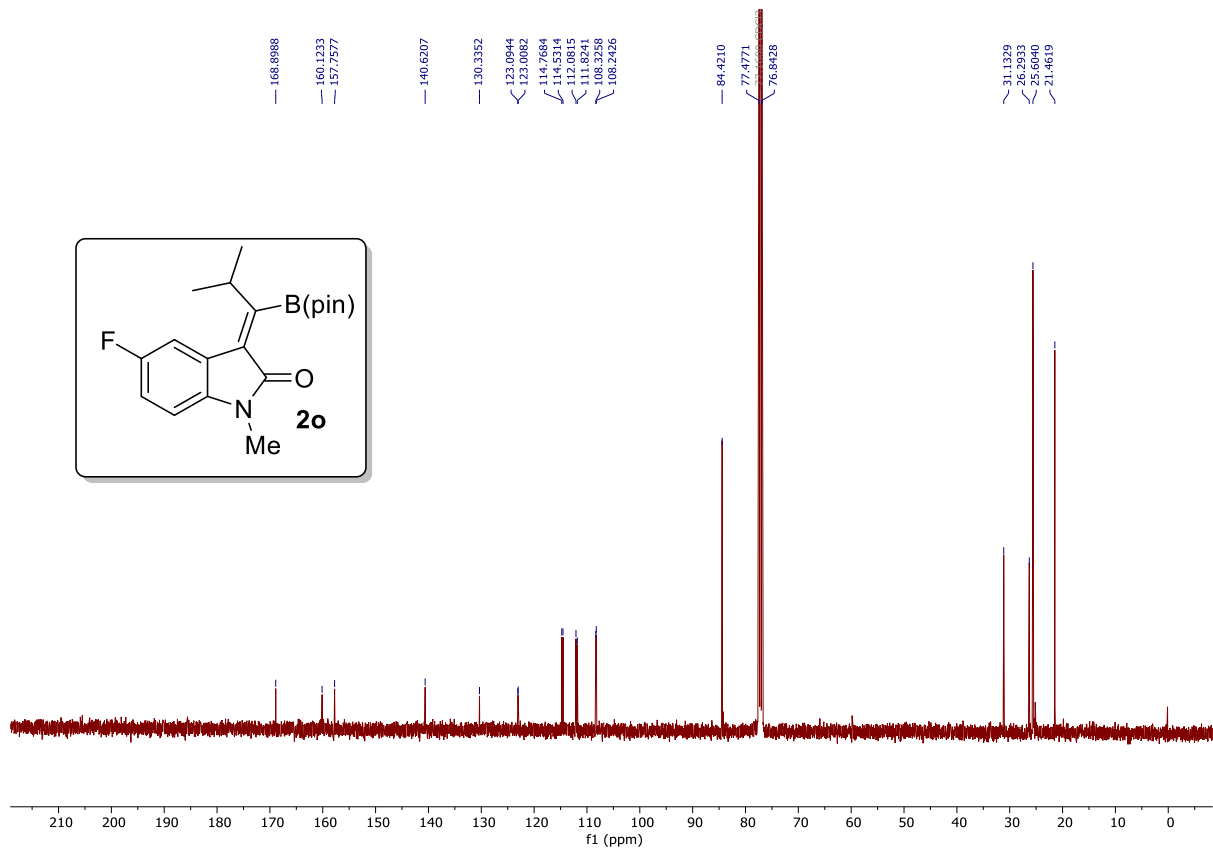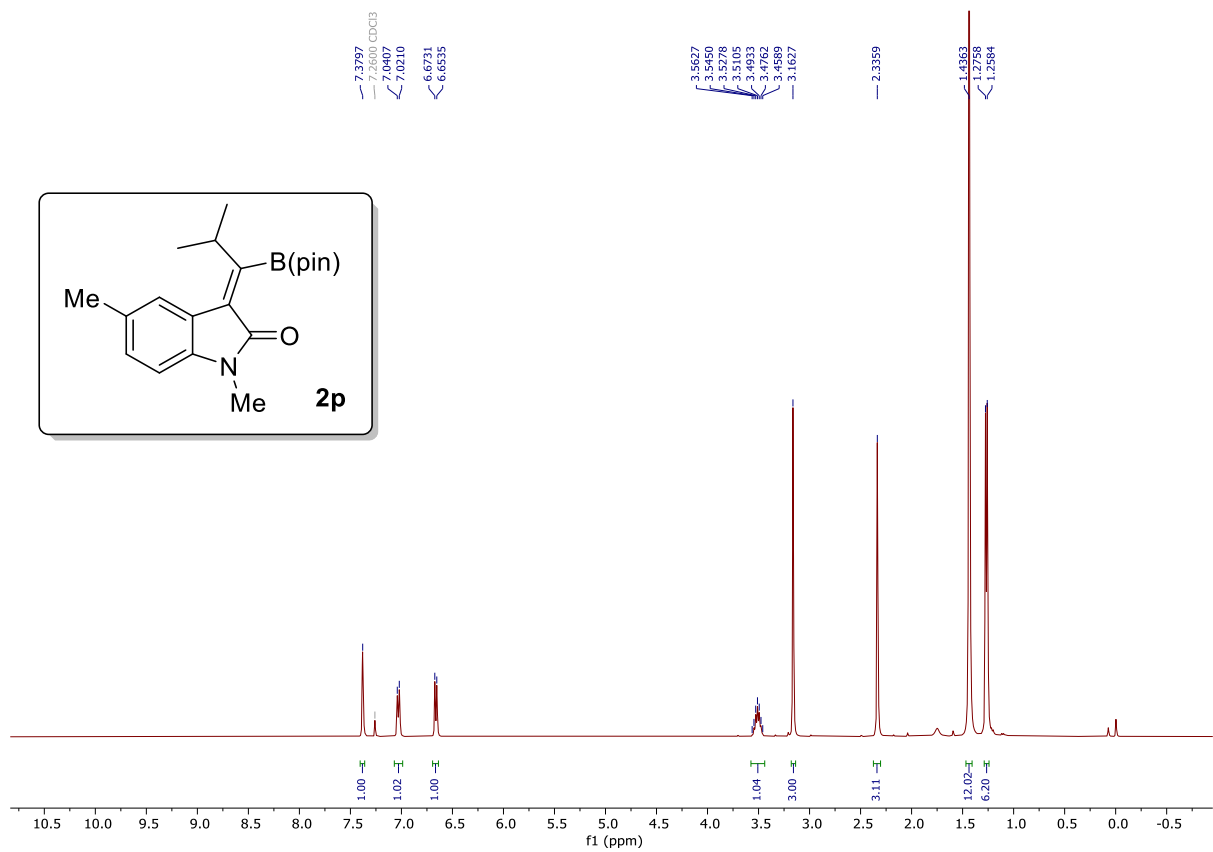

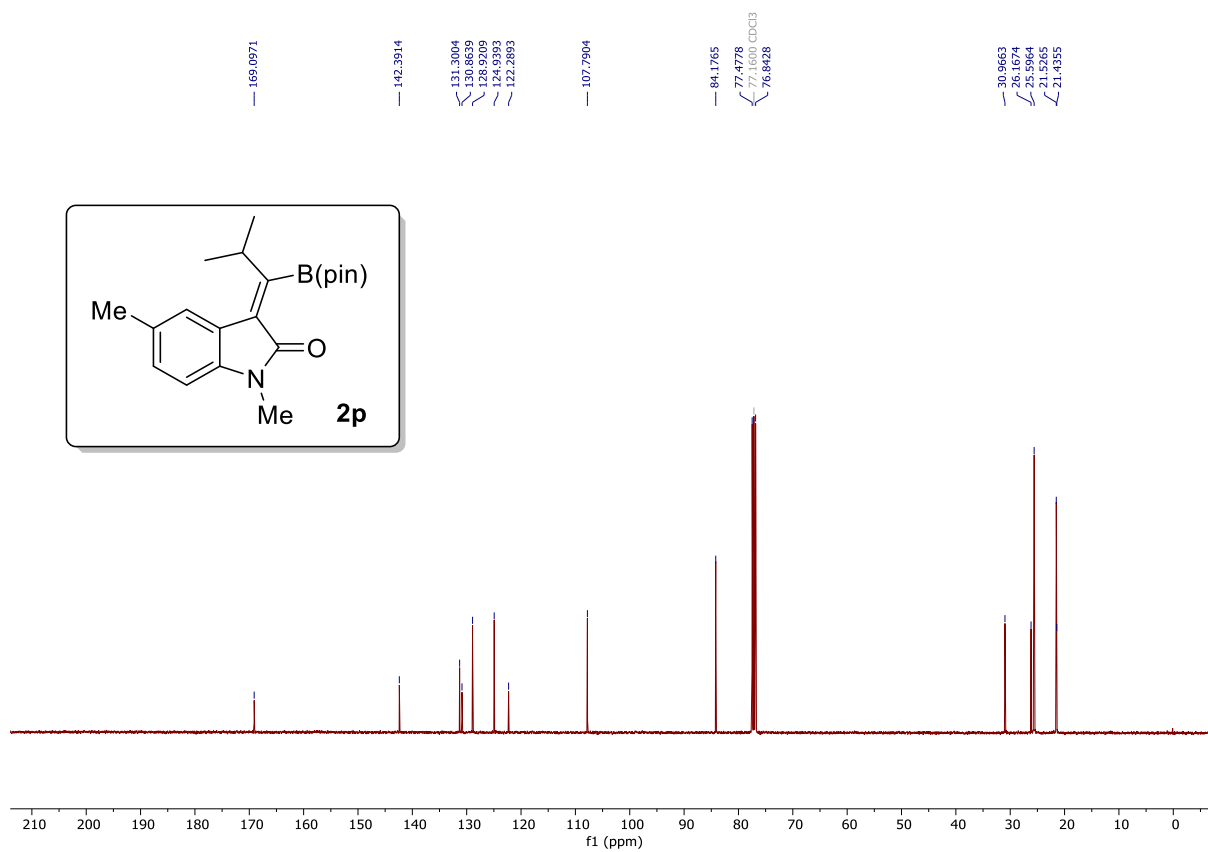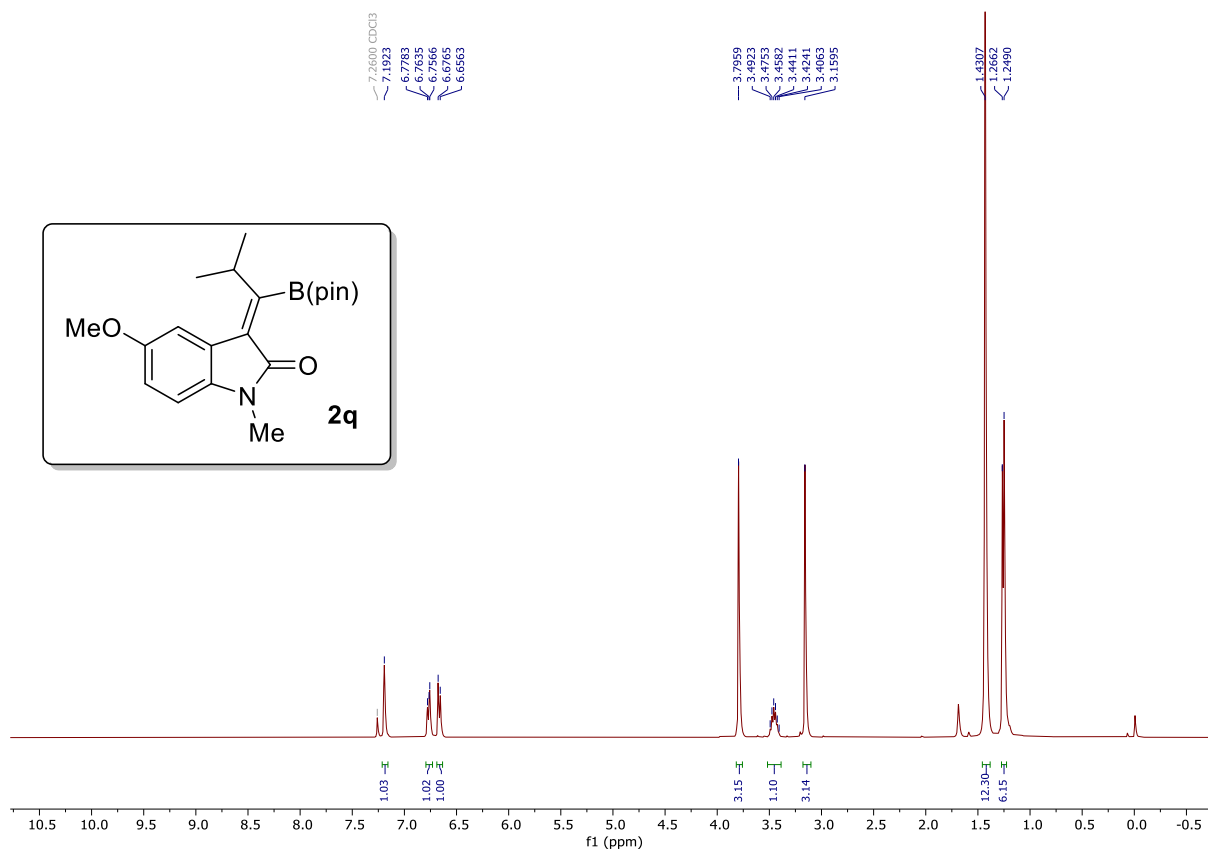

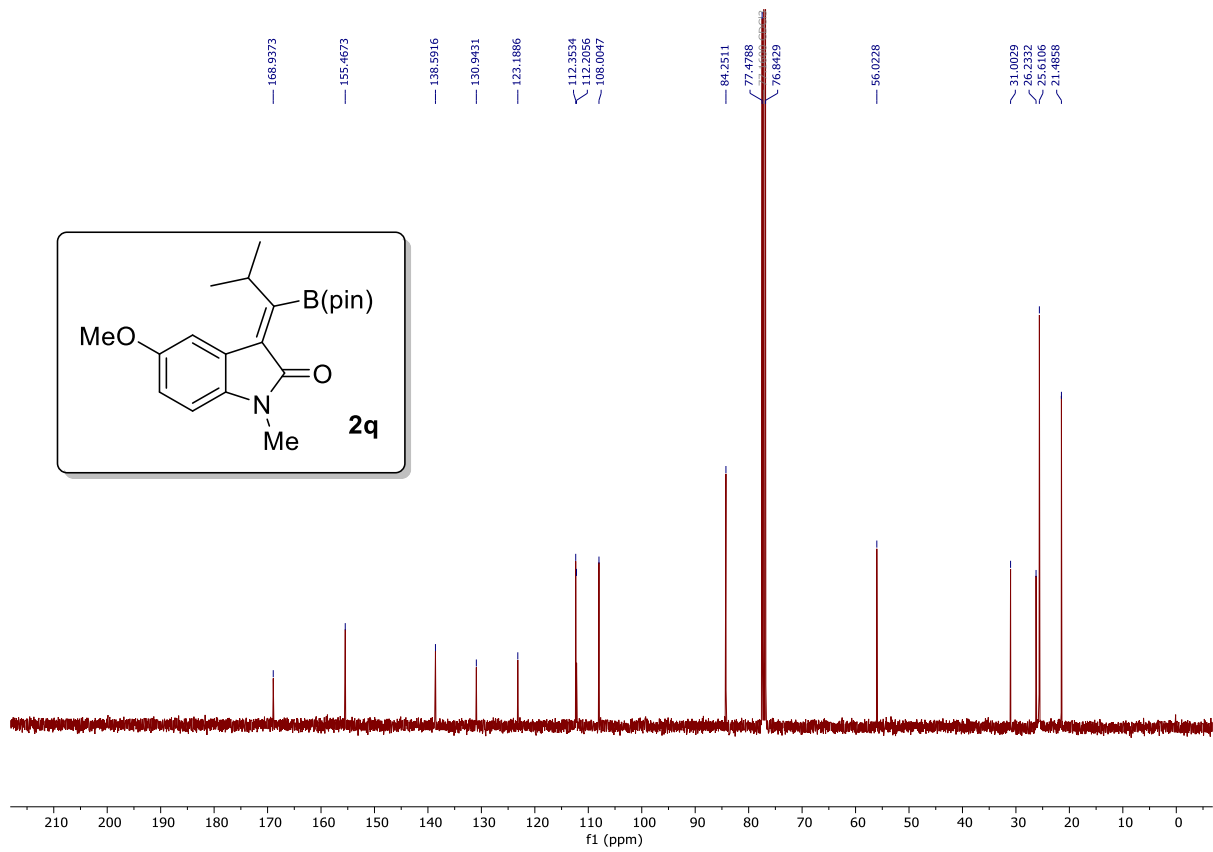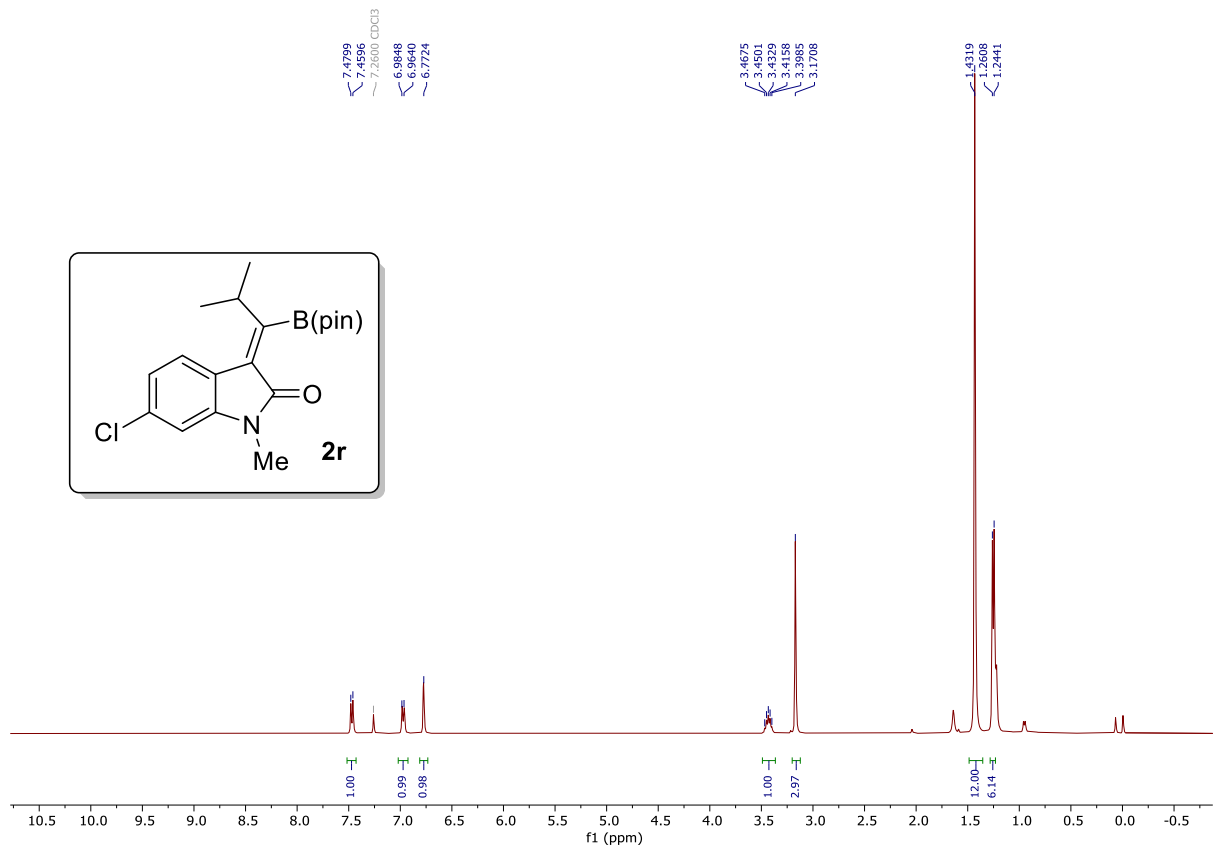



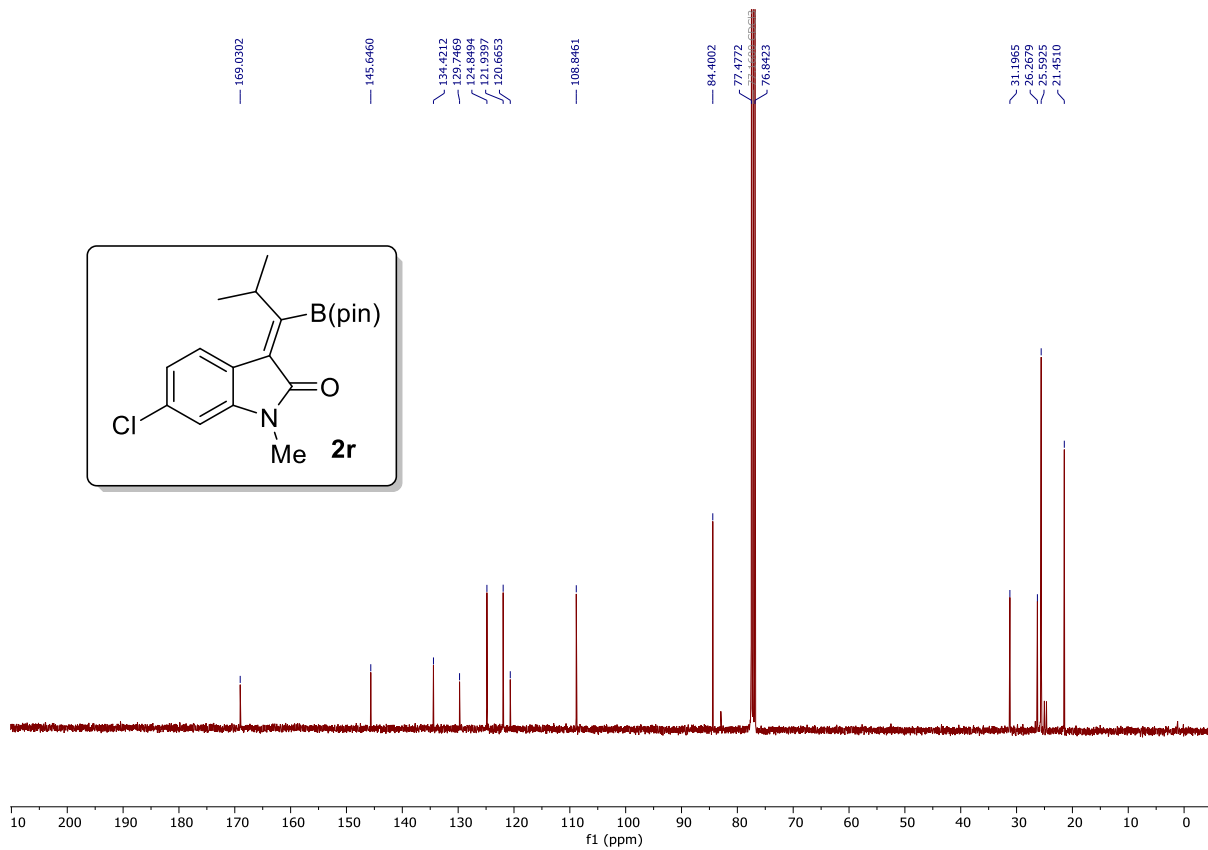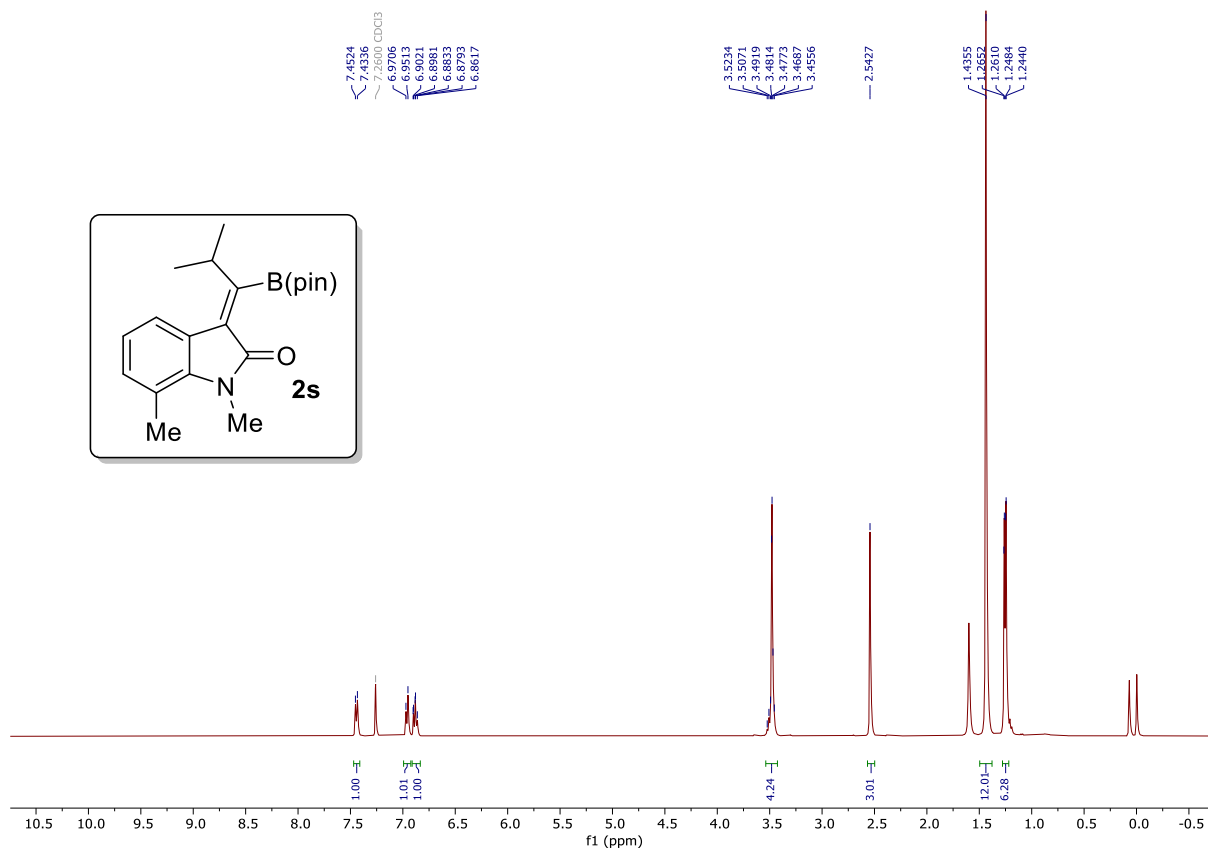

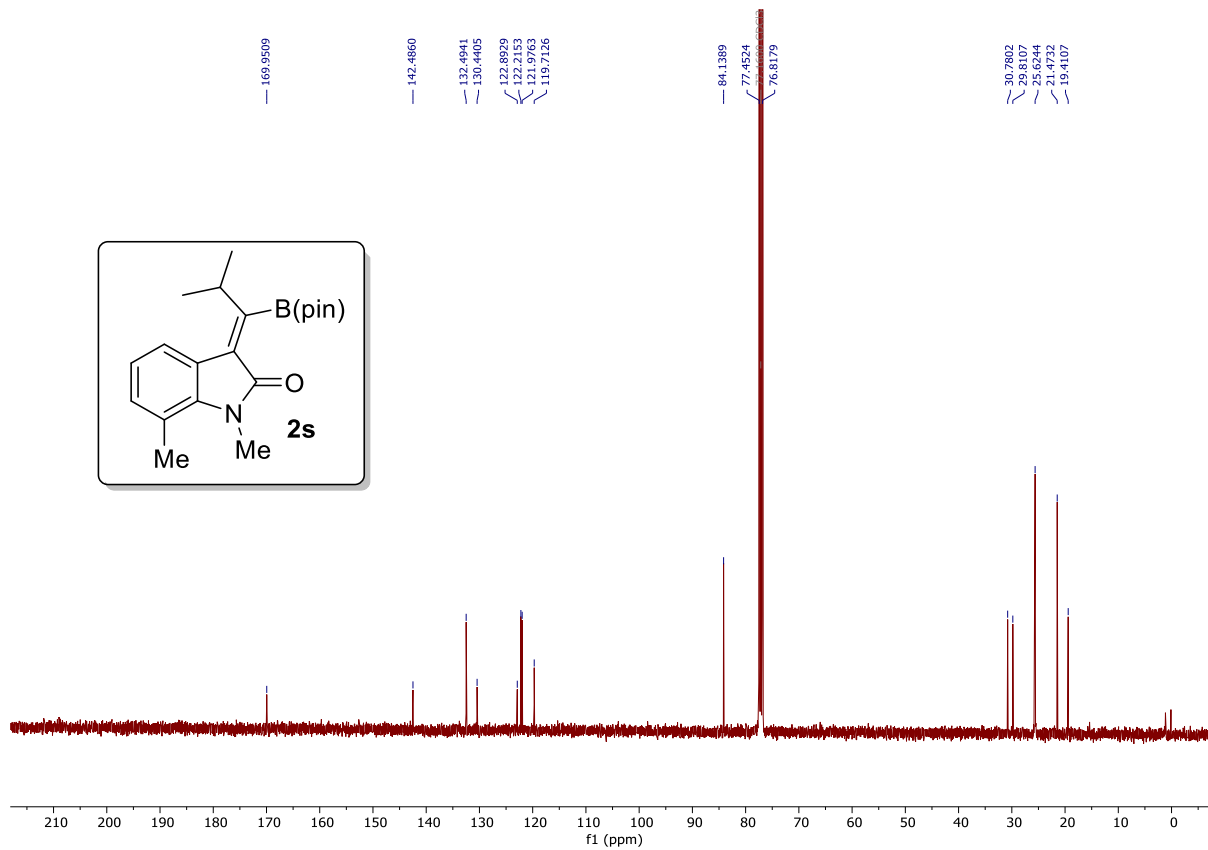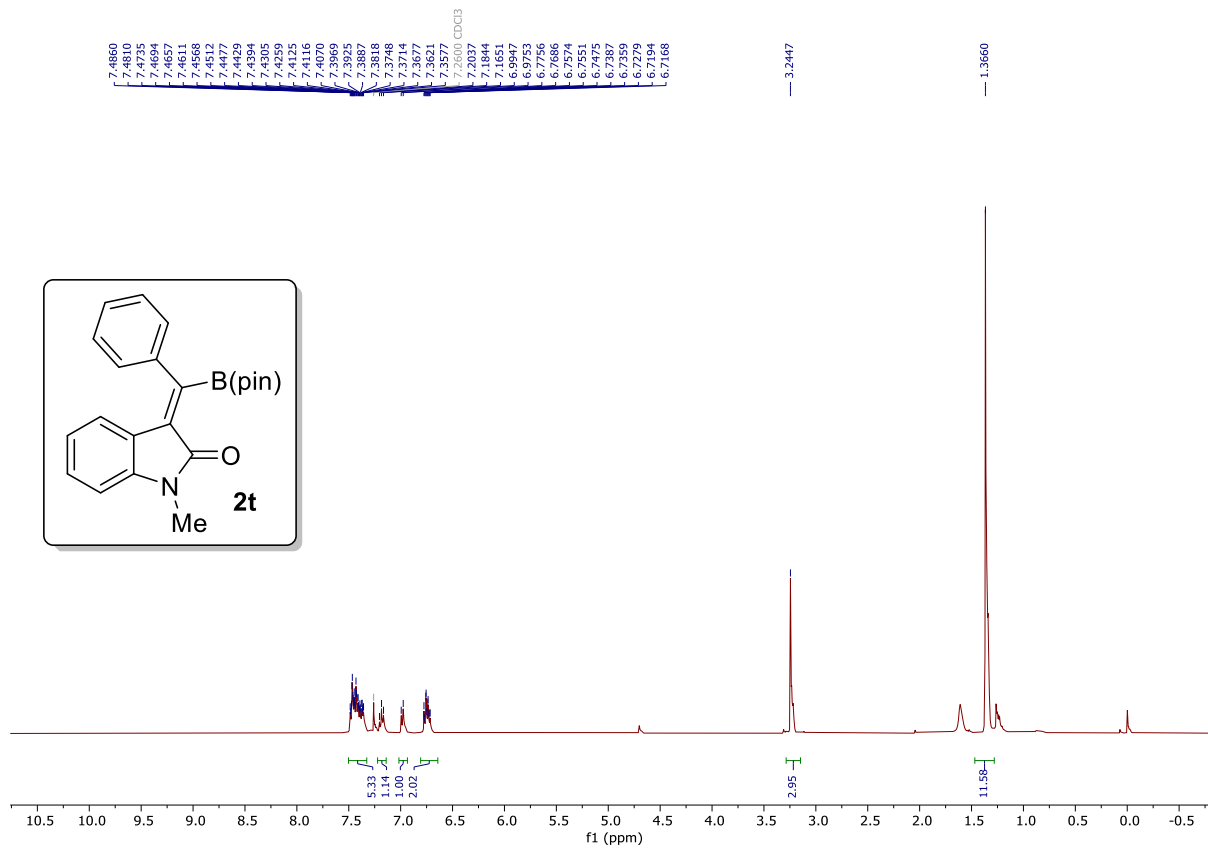

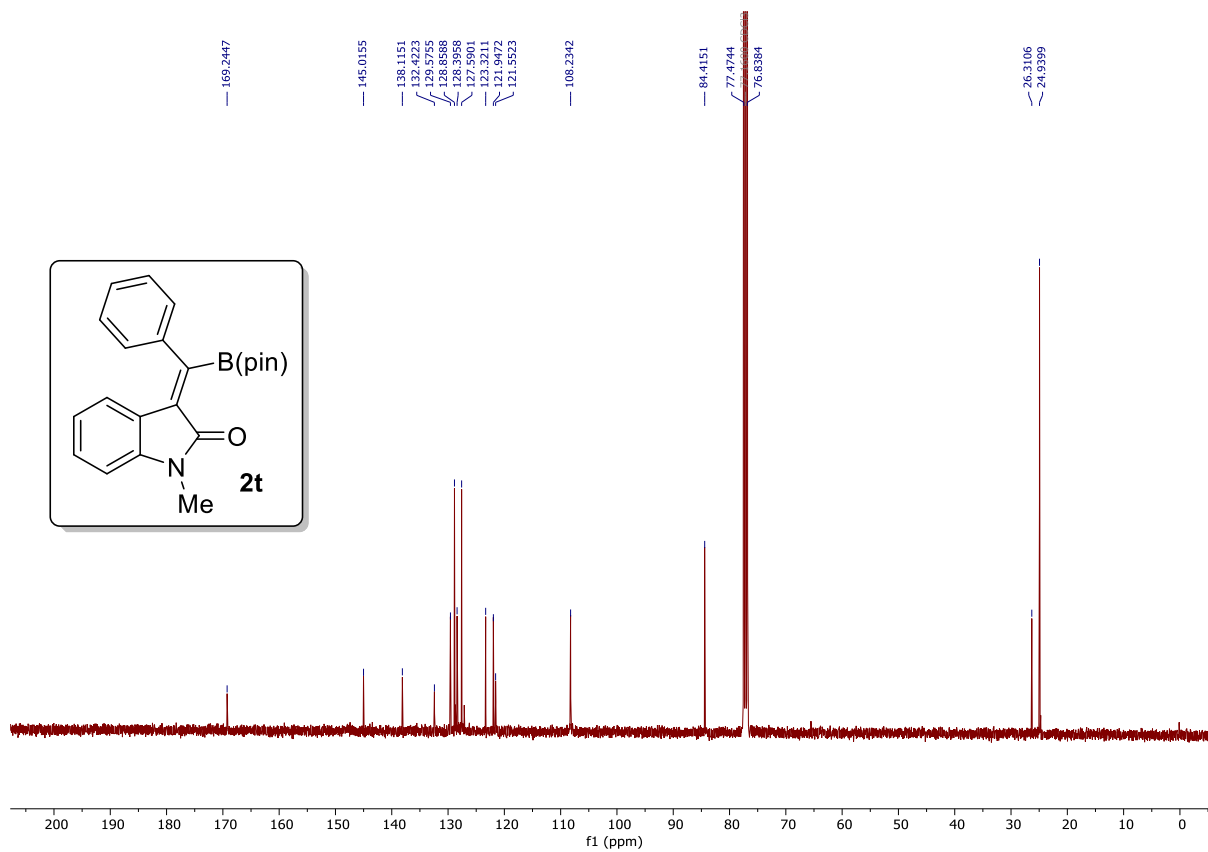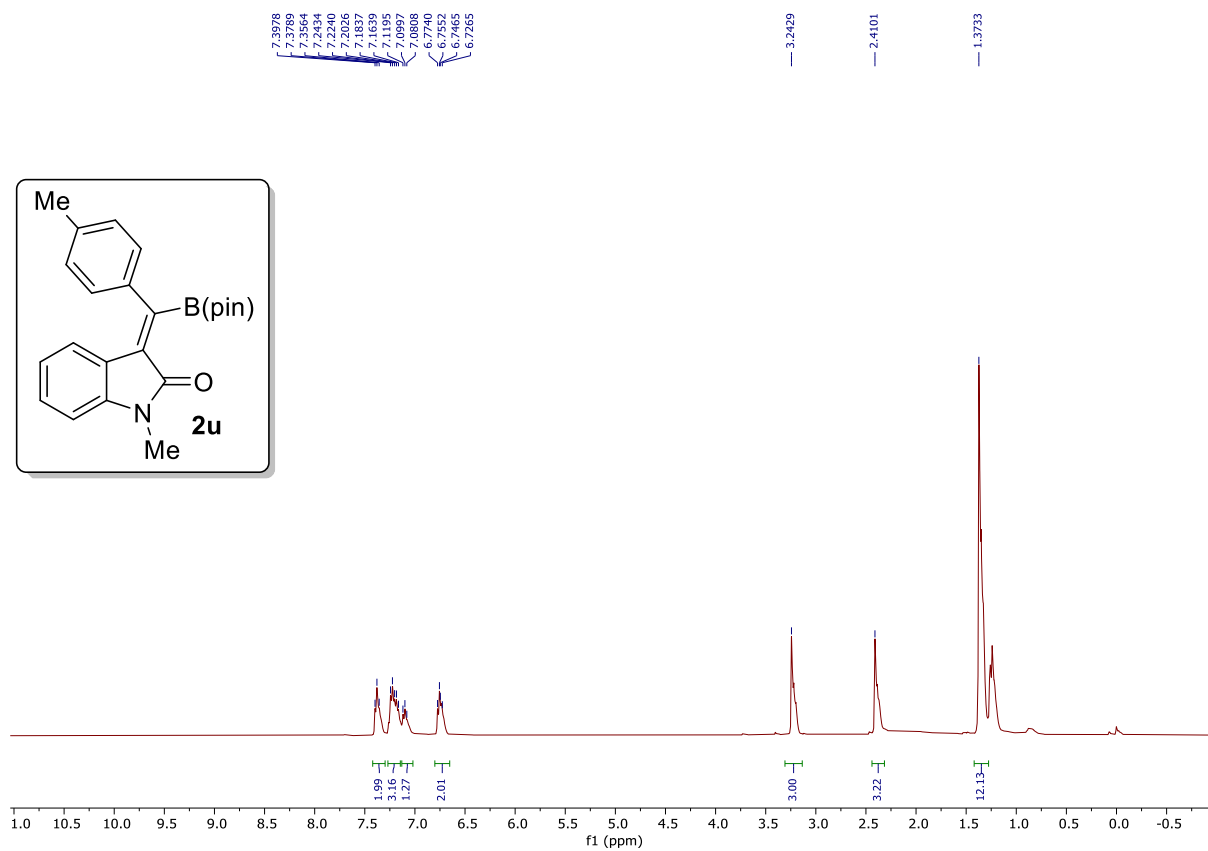

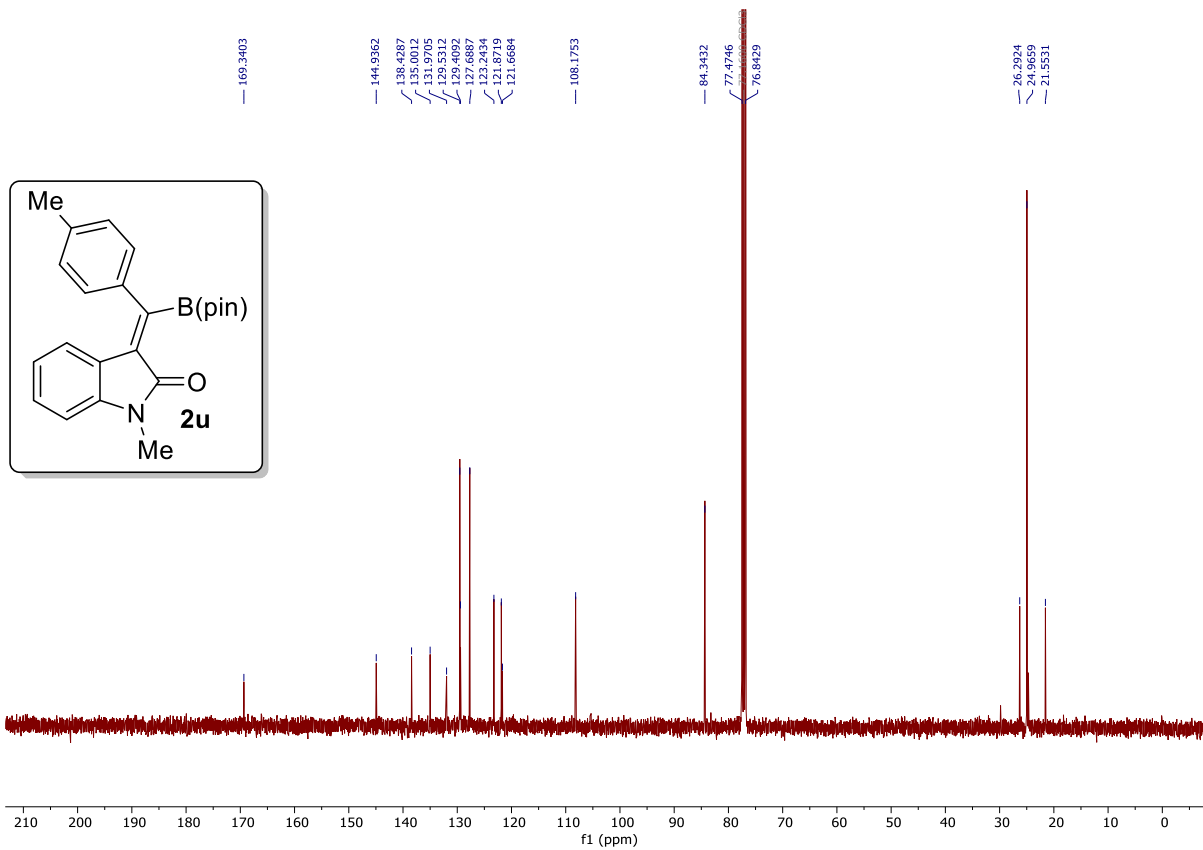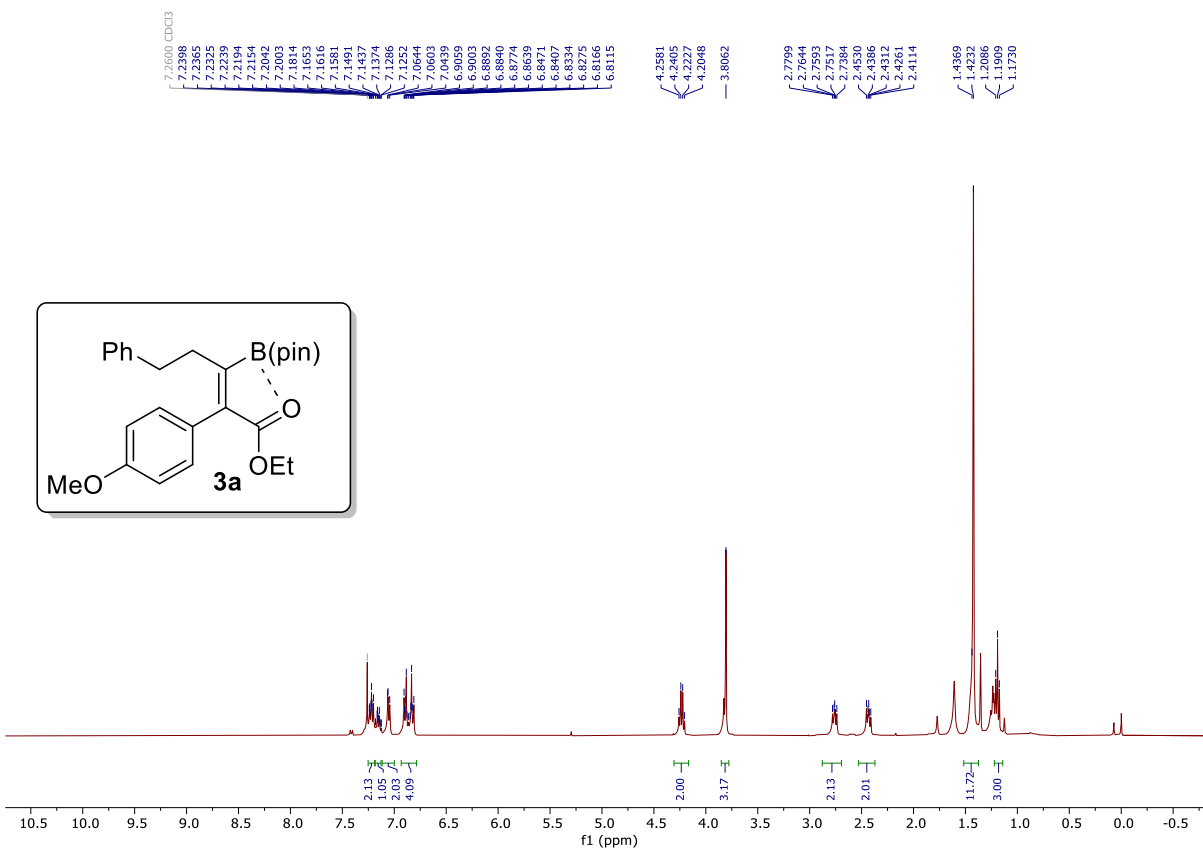

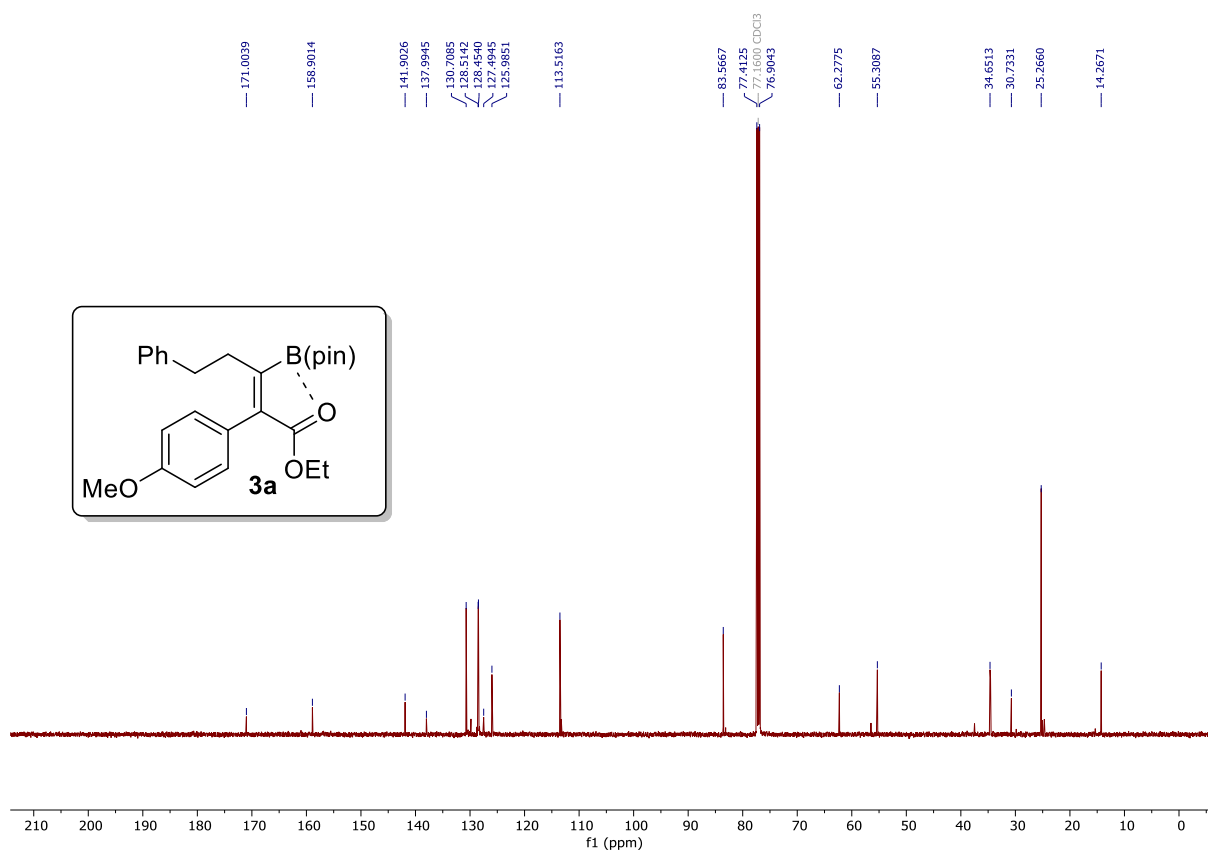

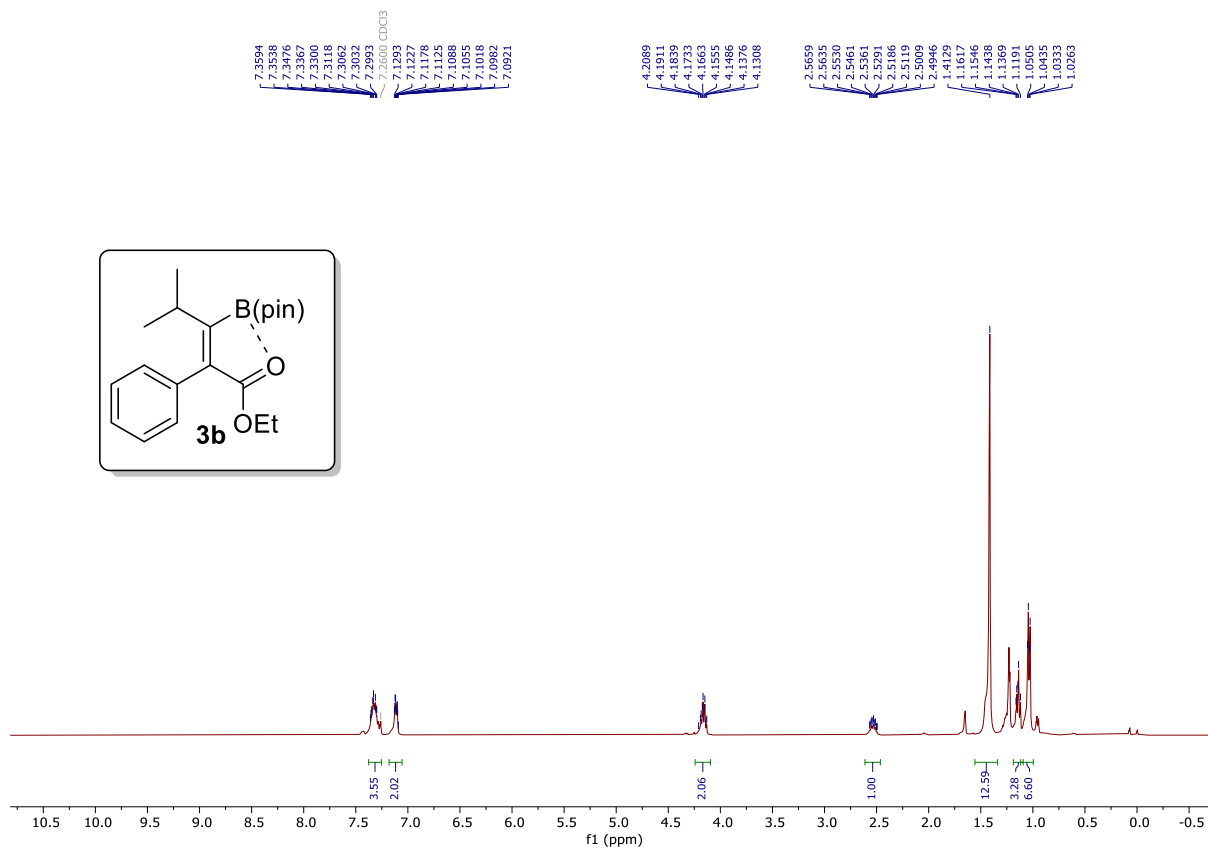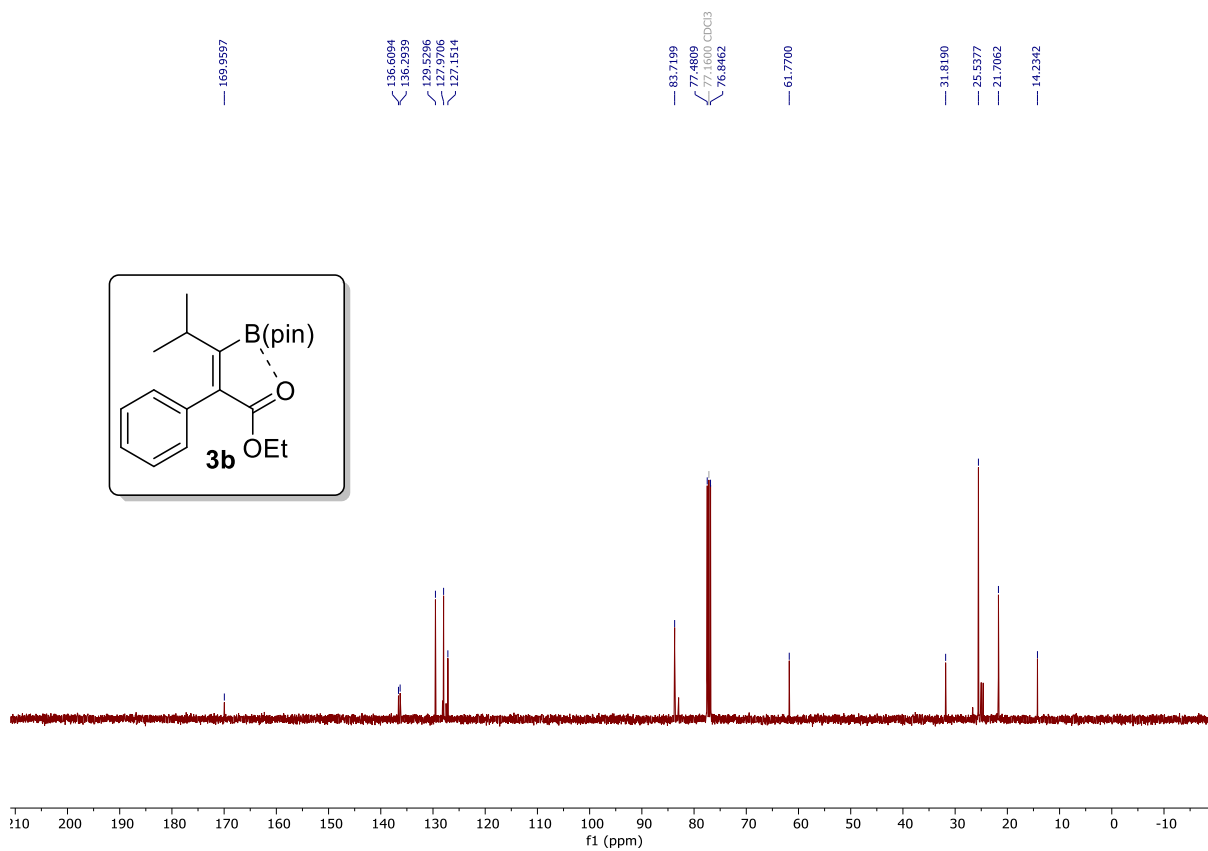

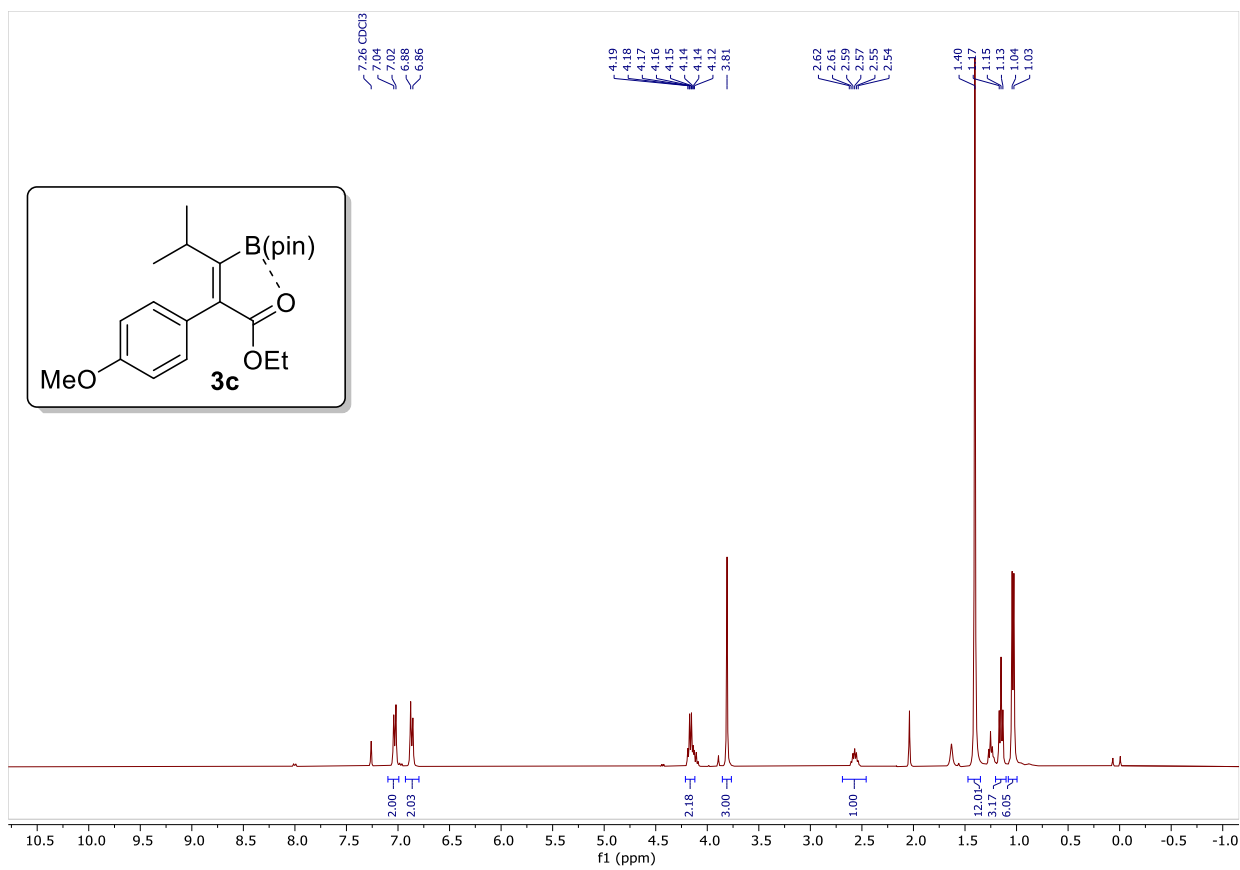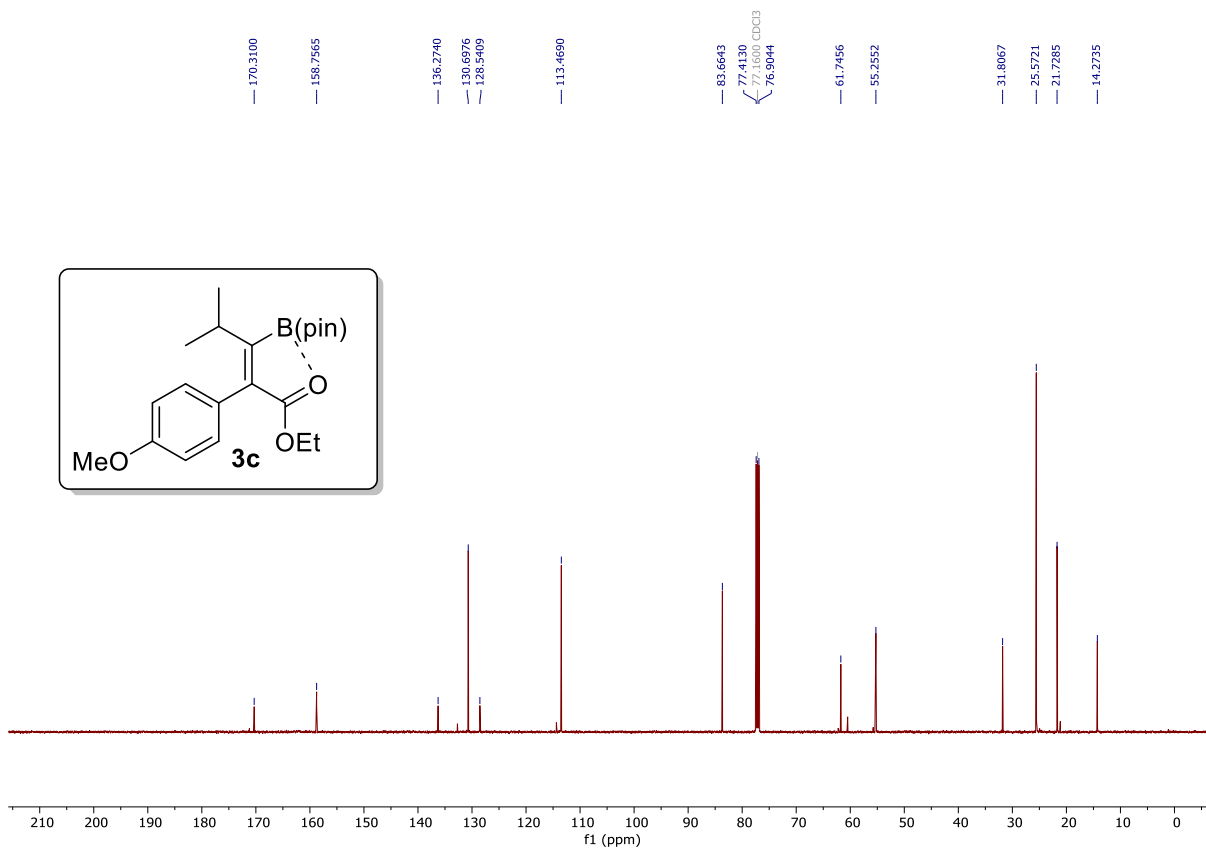

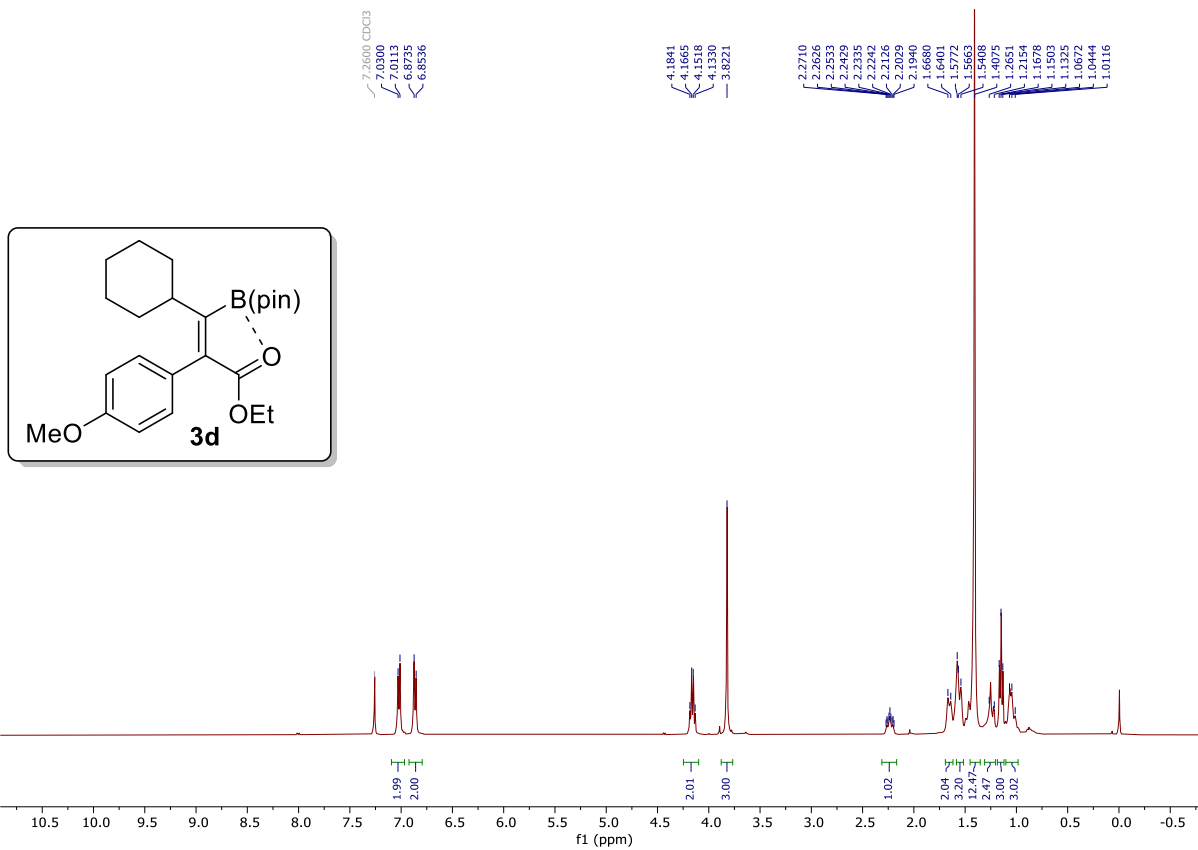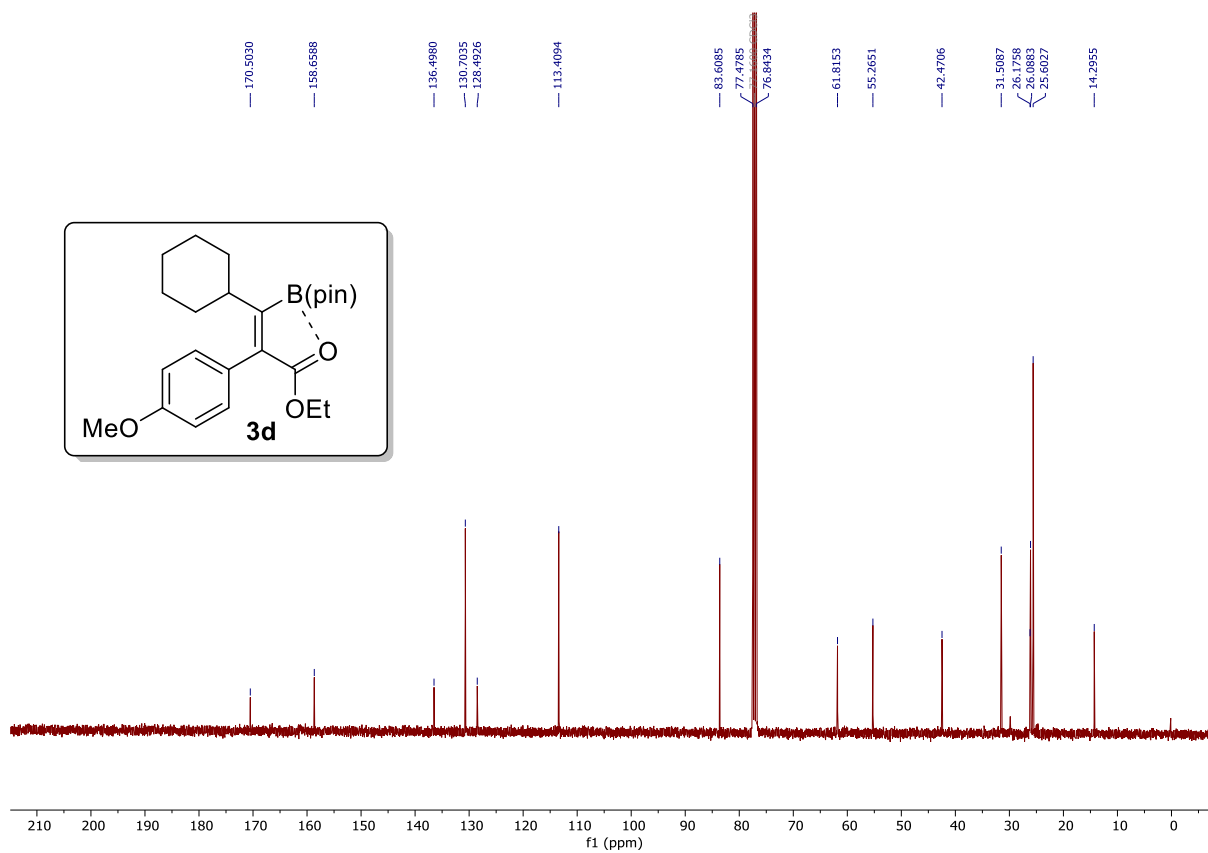



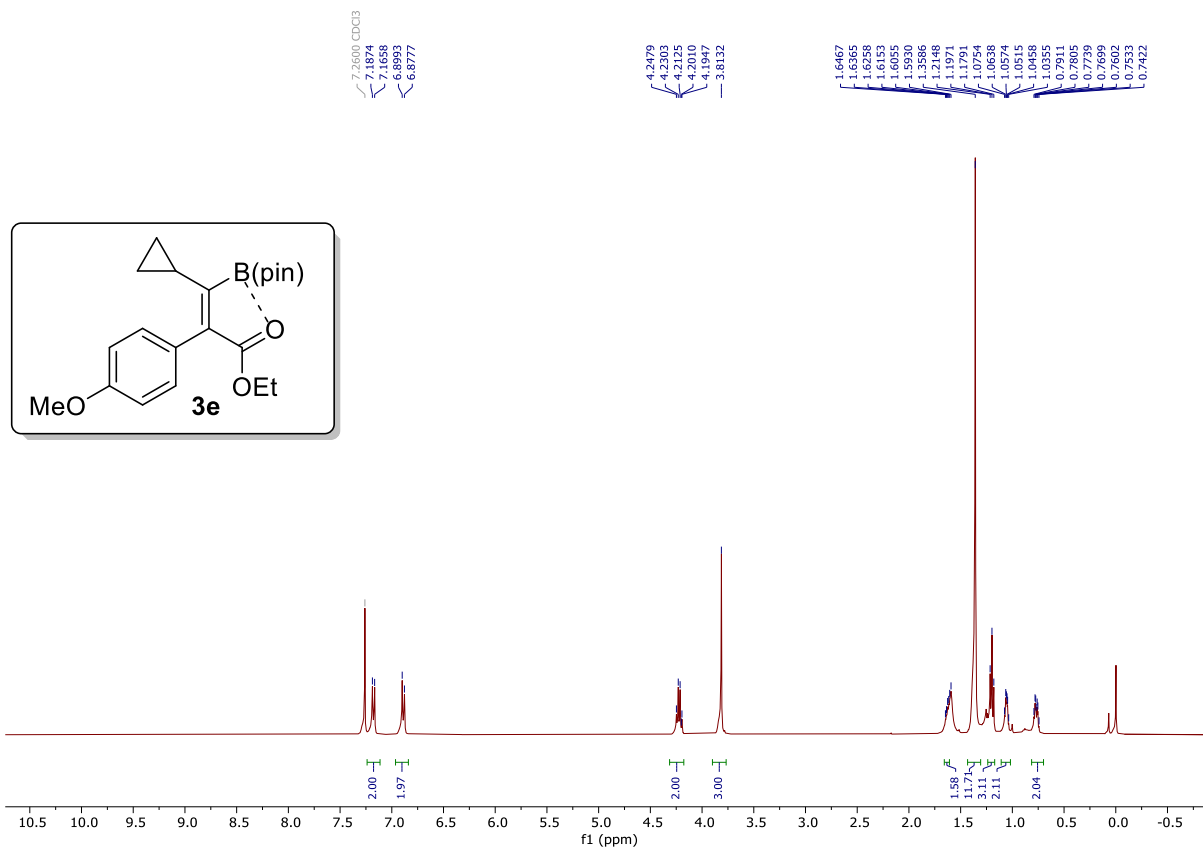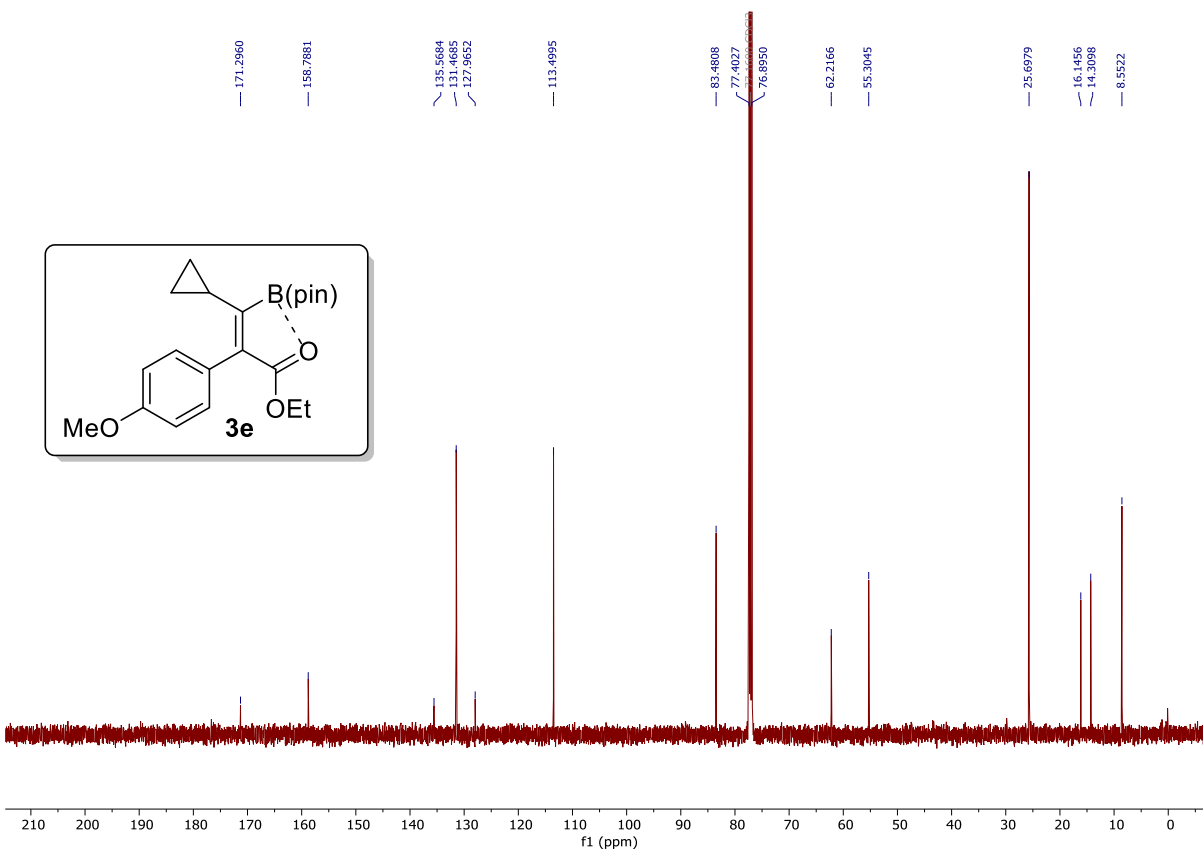

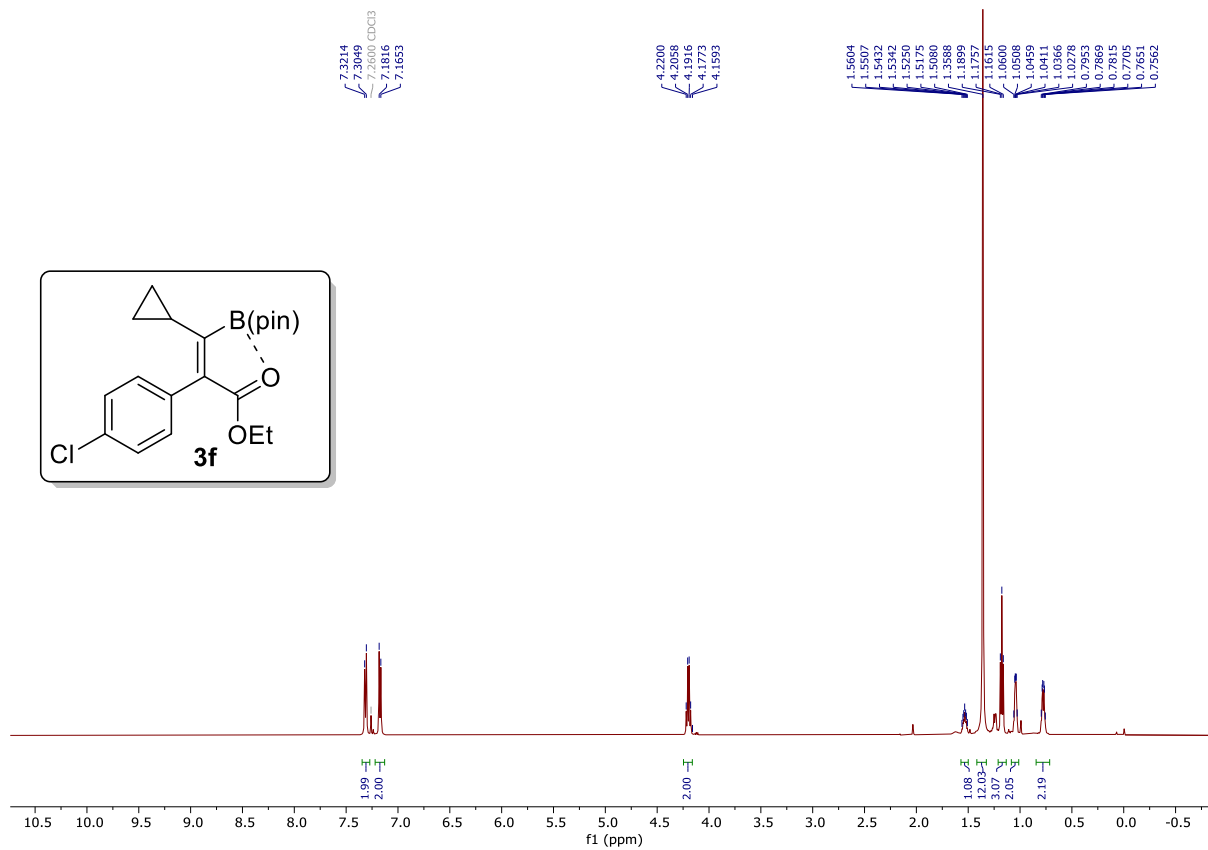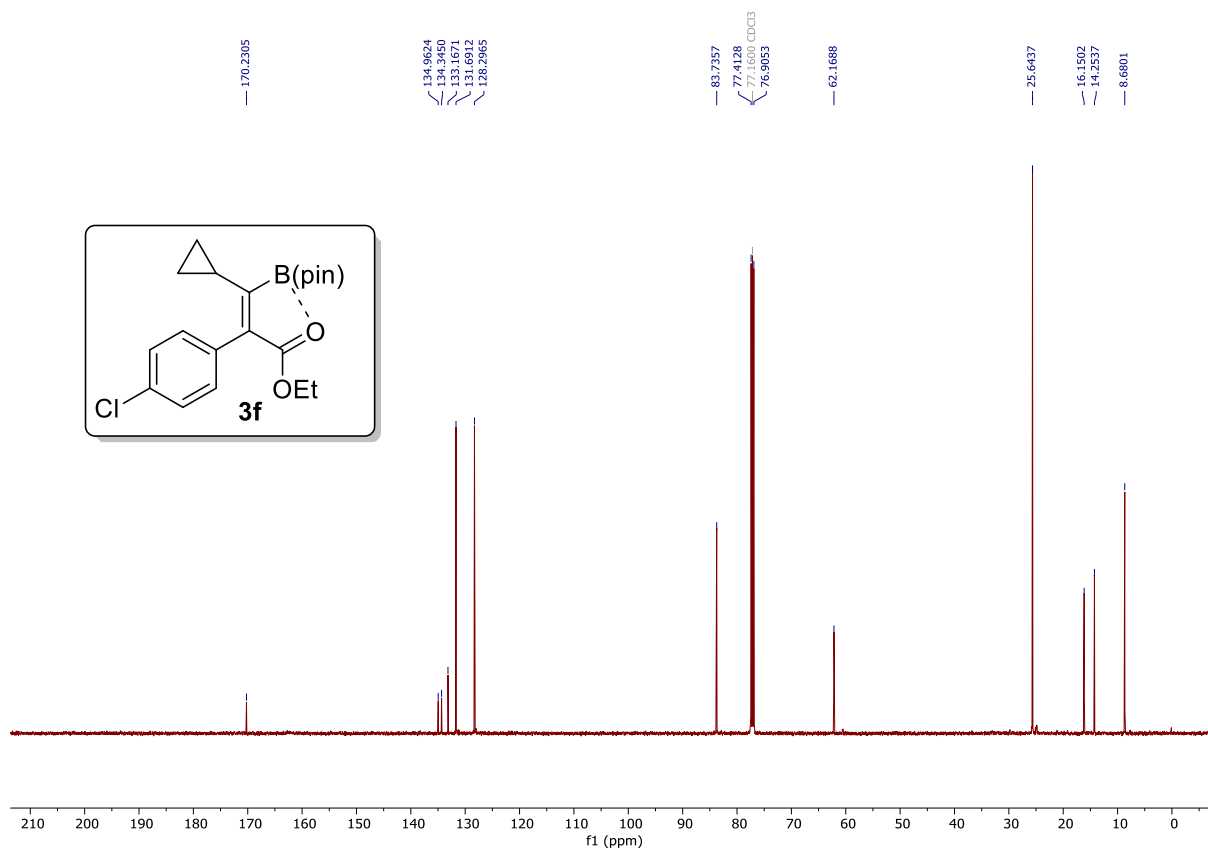

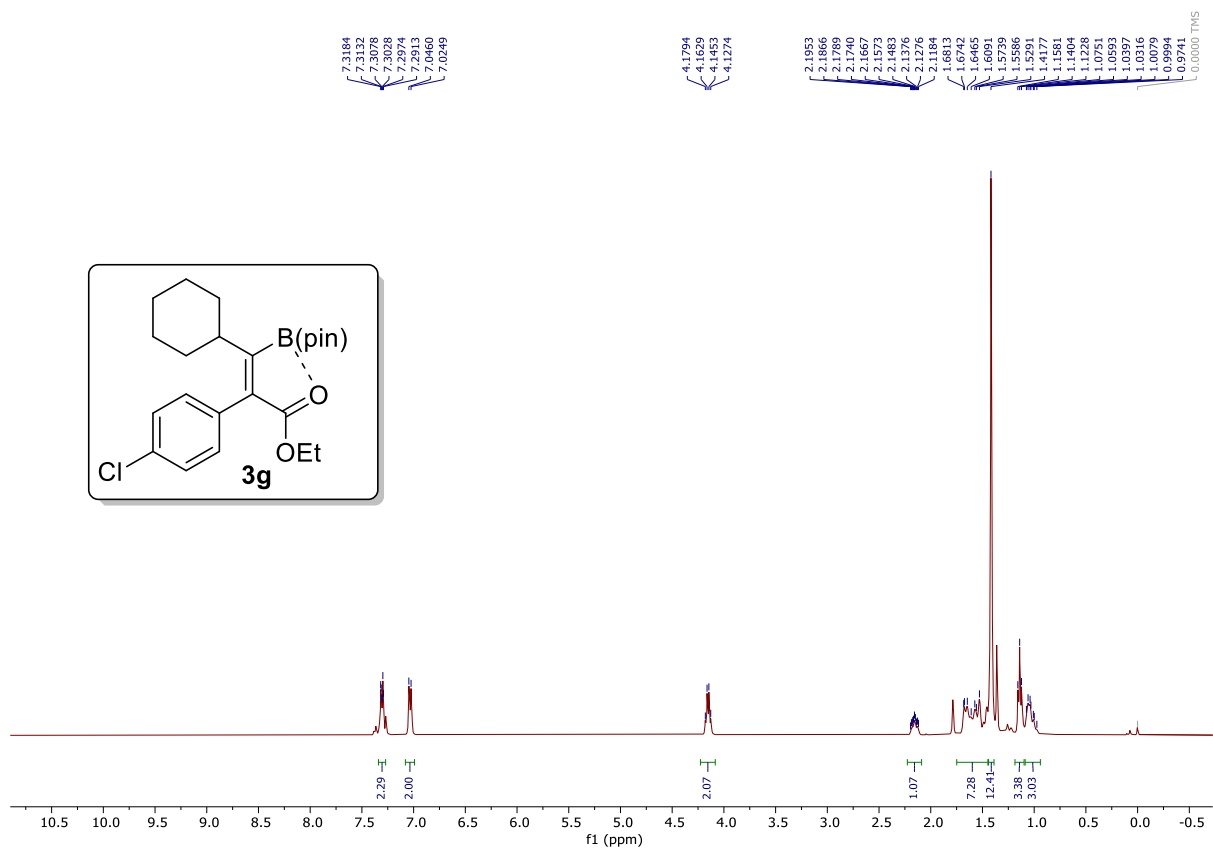

sp (1).dg590Cl.2.fid  
sp.dg590Cl- NMR 400Mhz

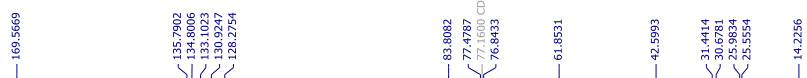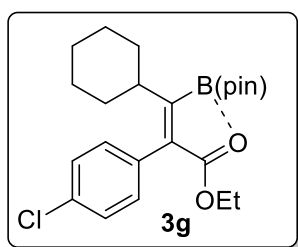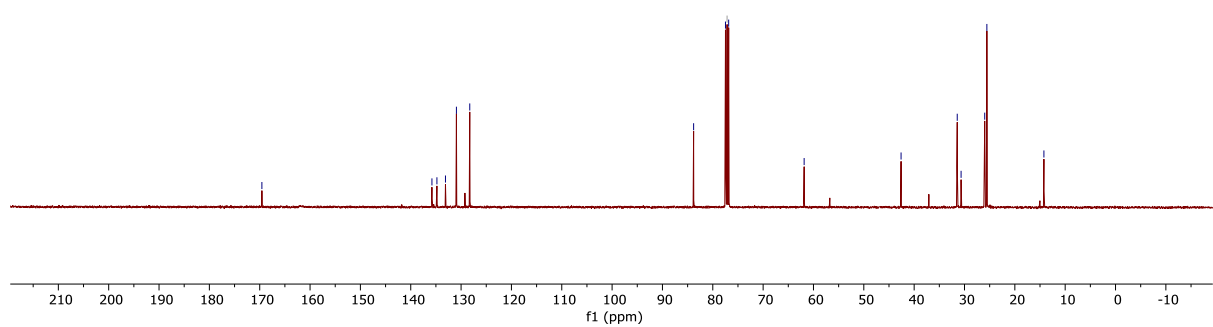

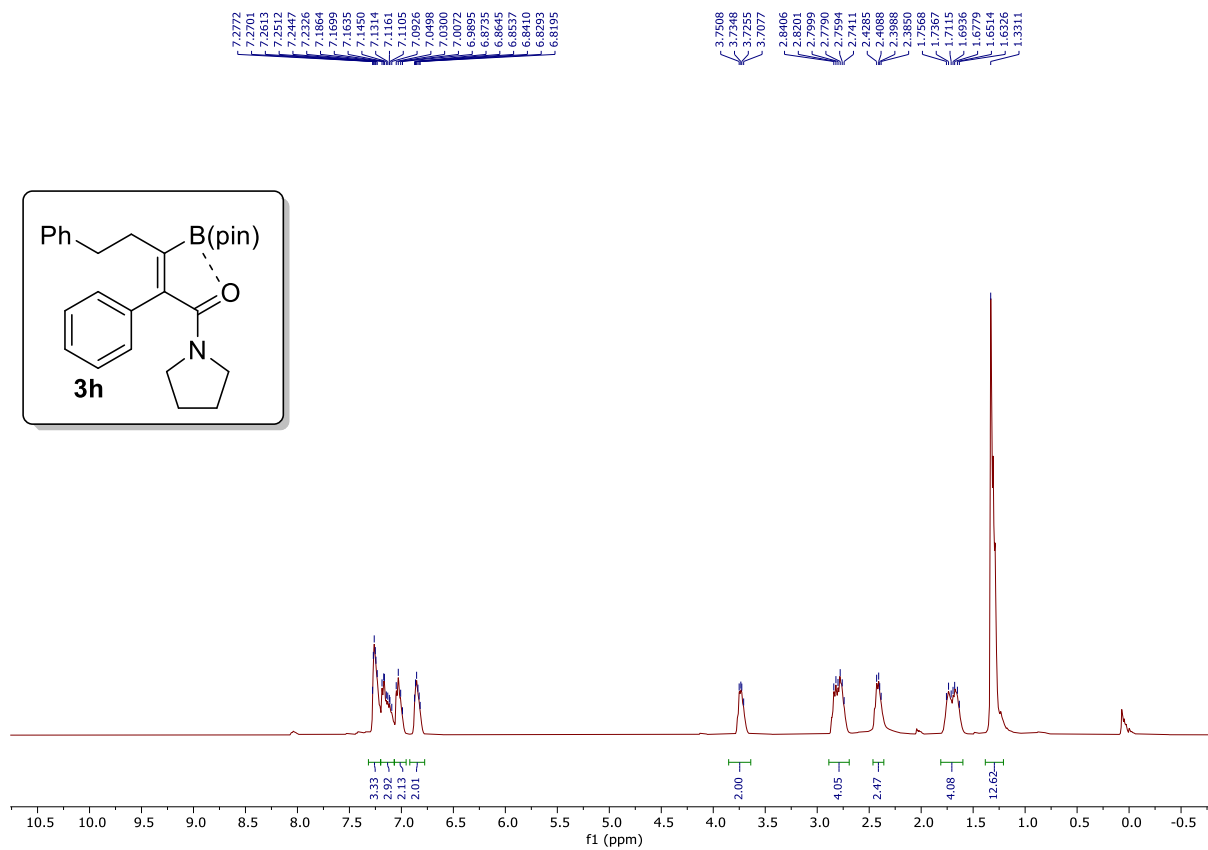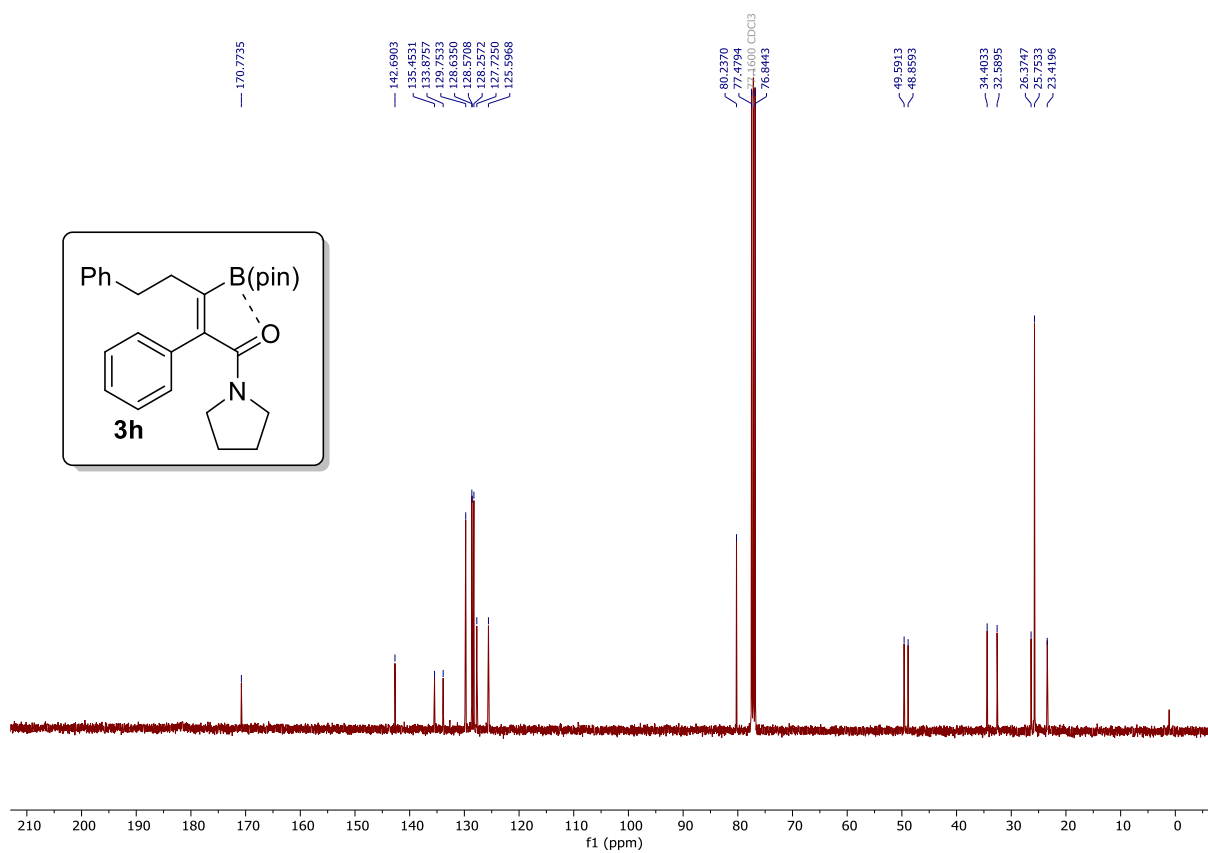

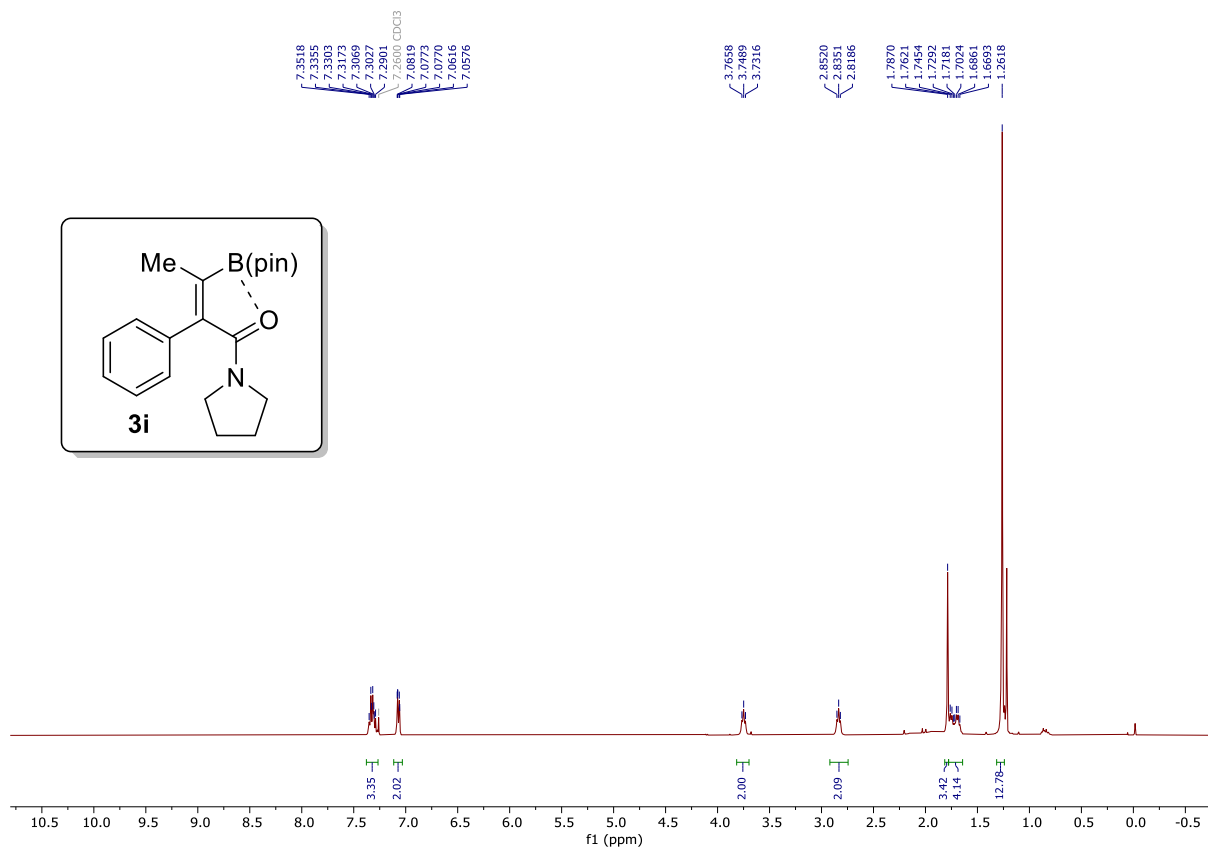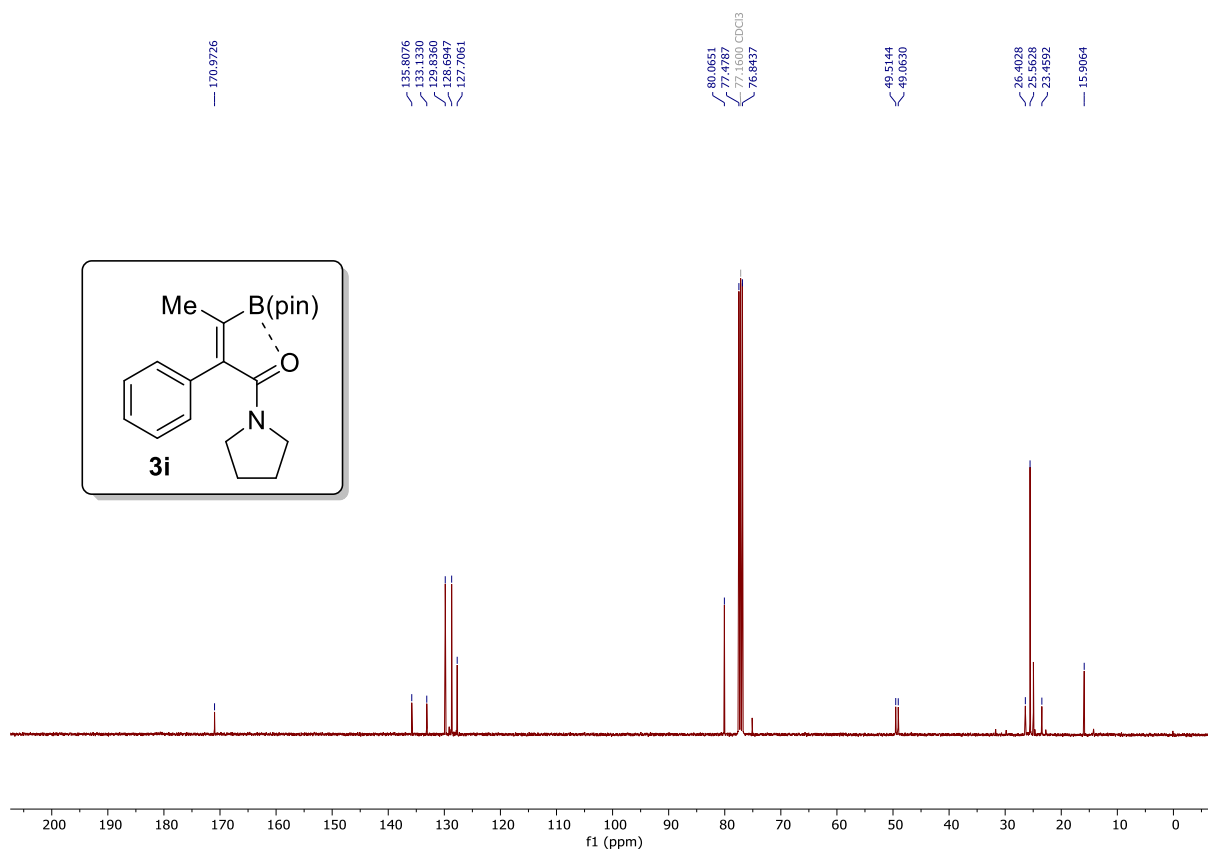

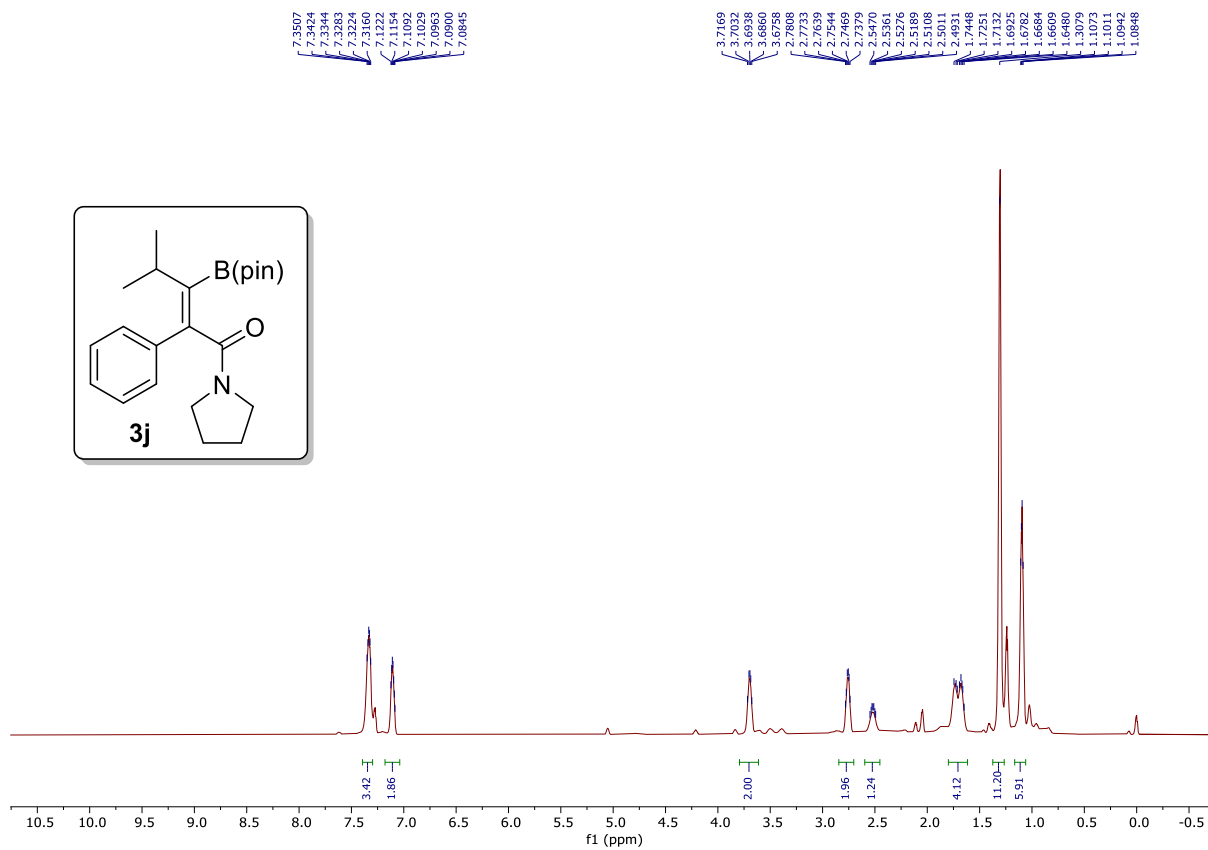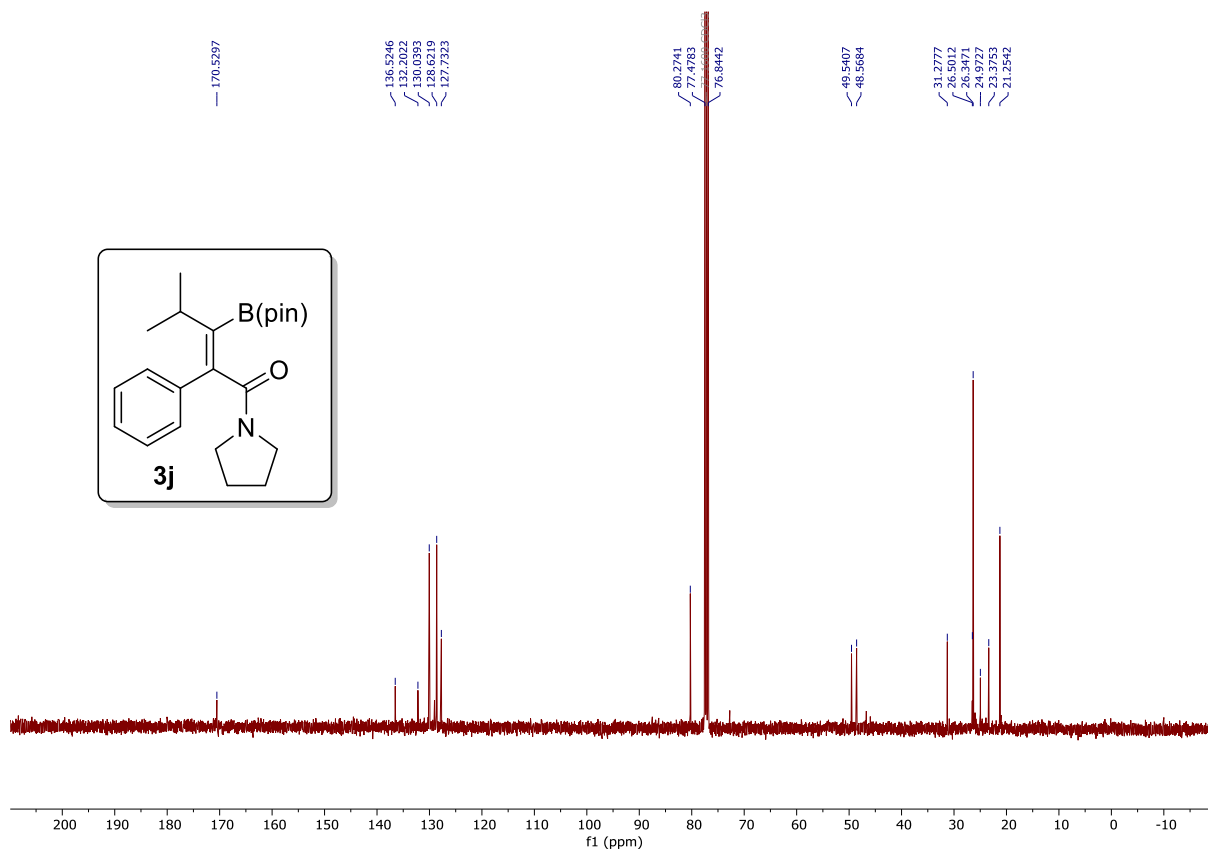

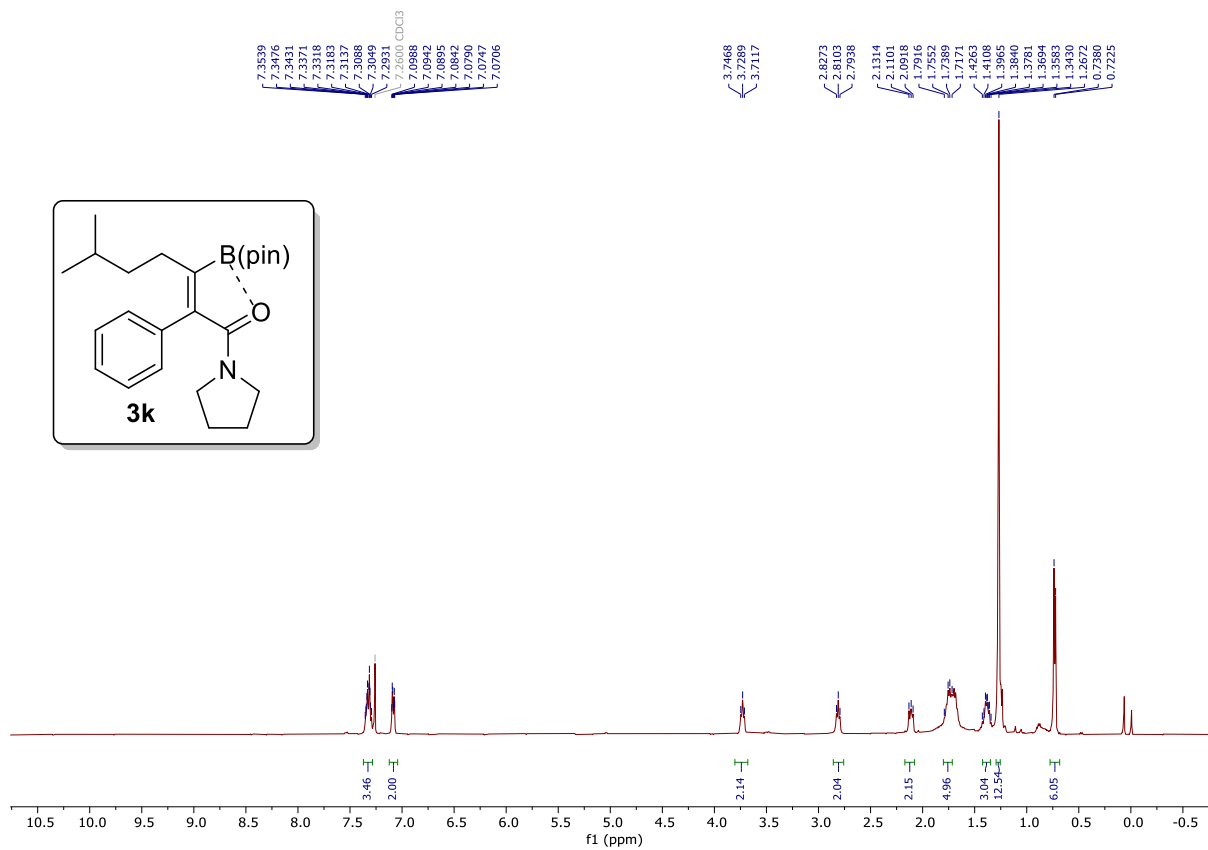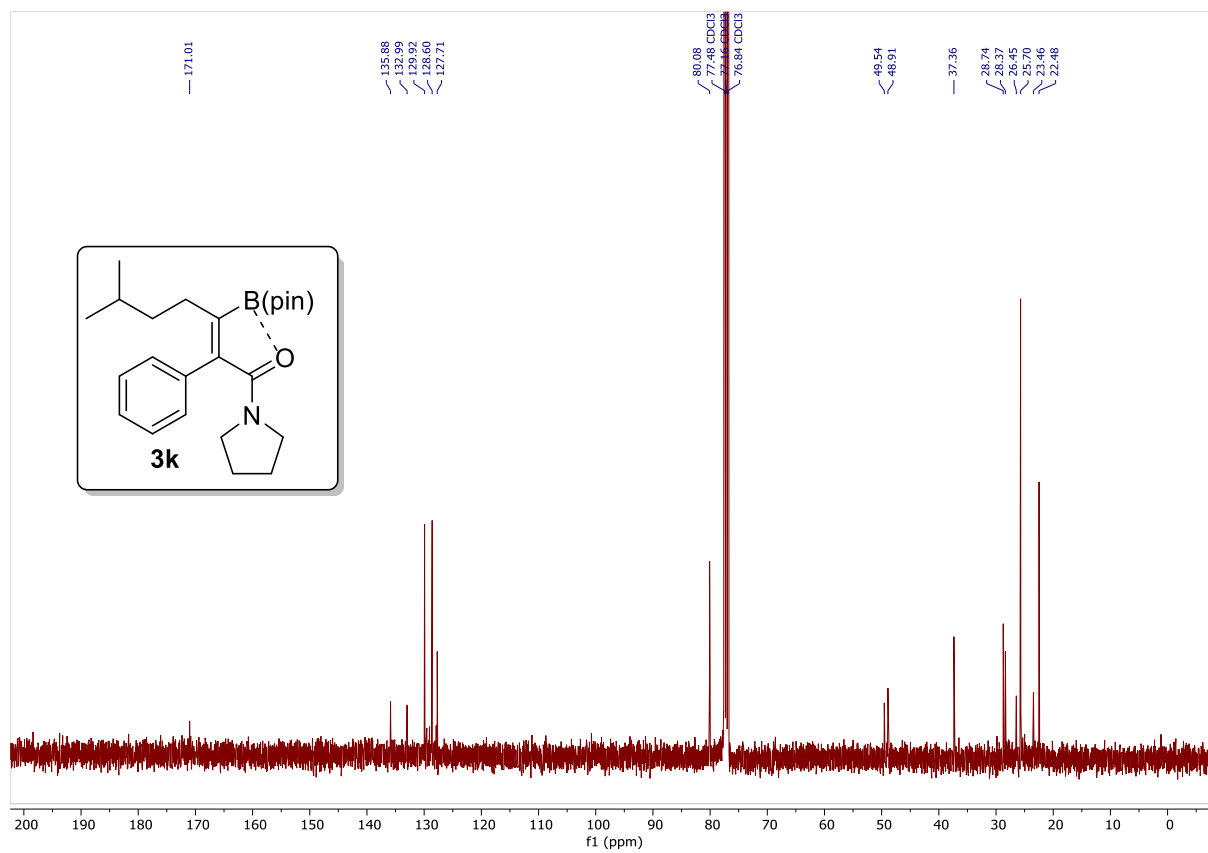

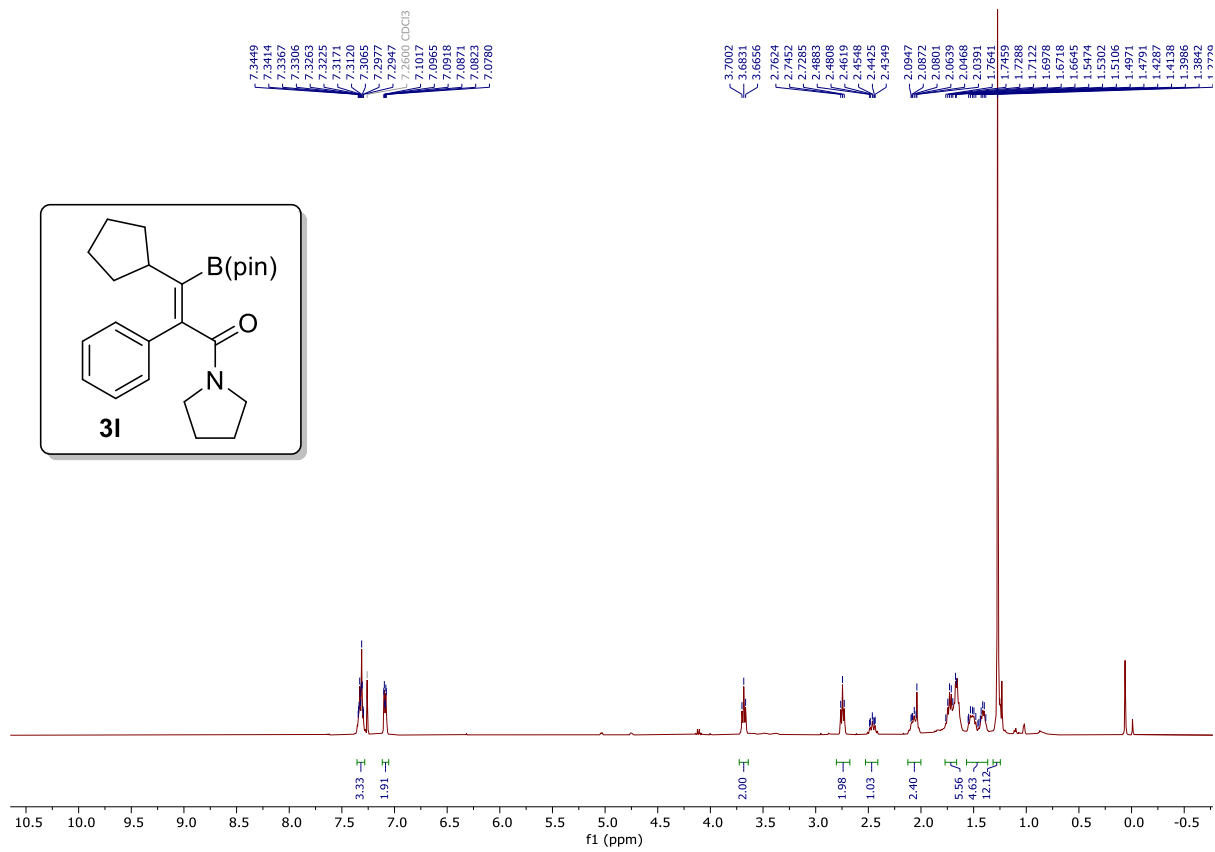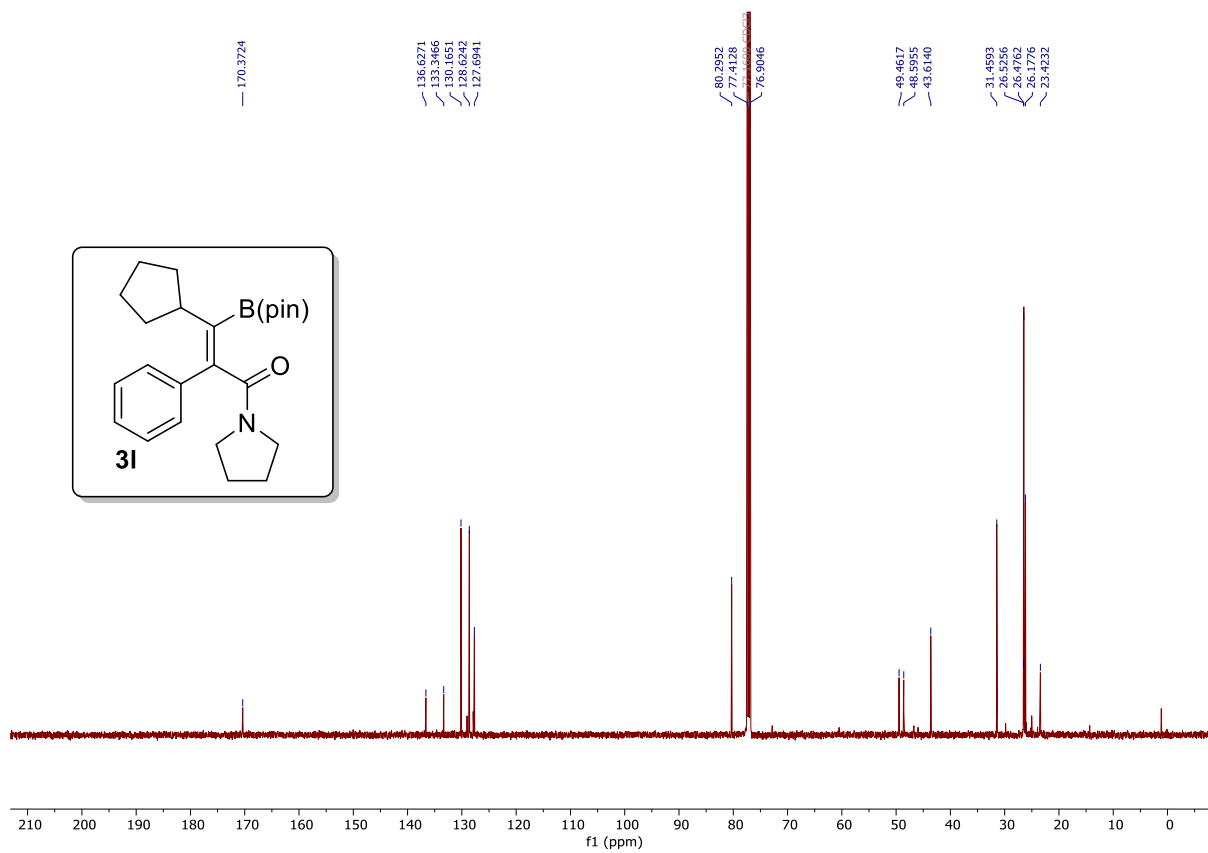



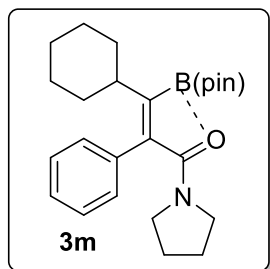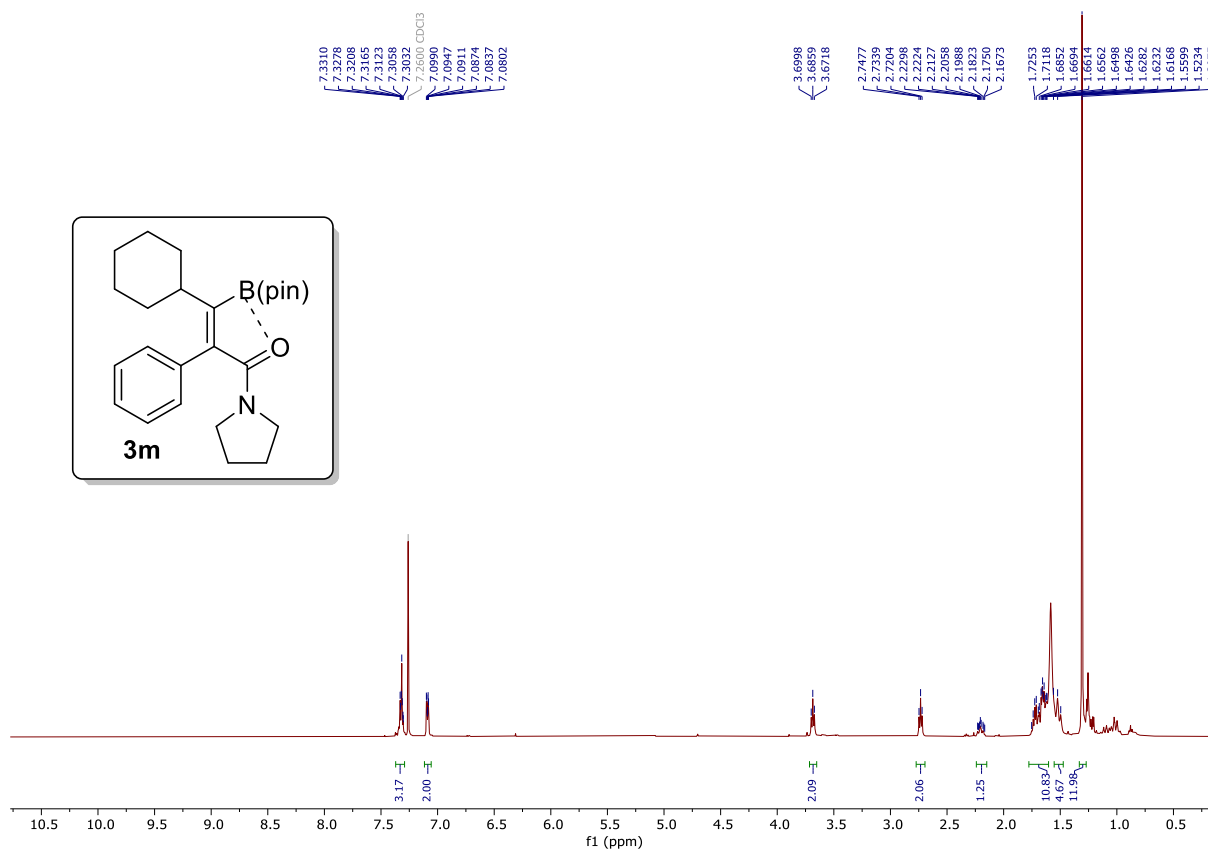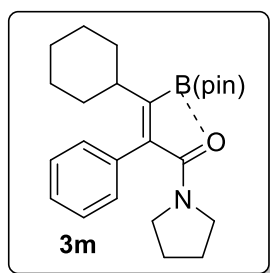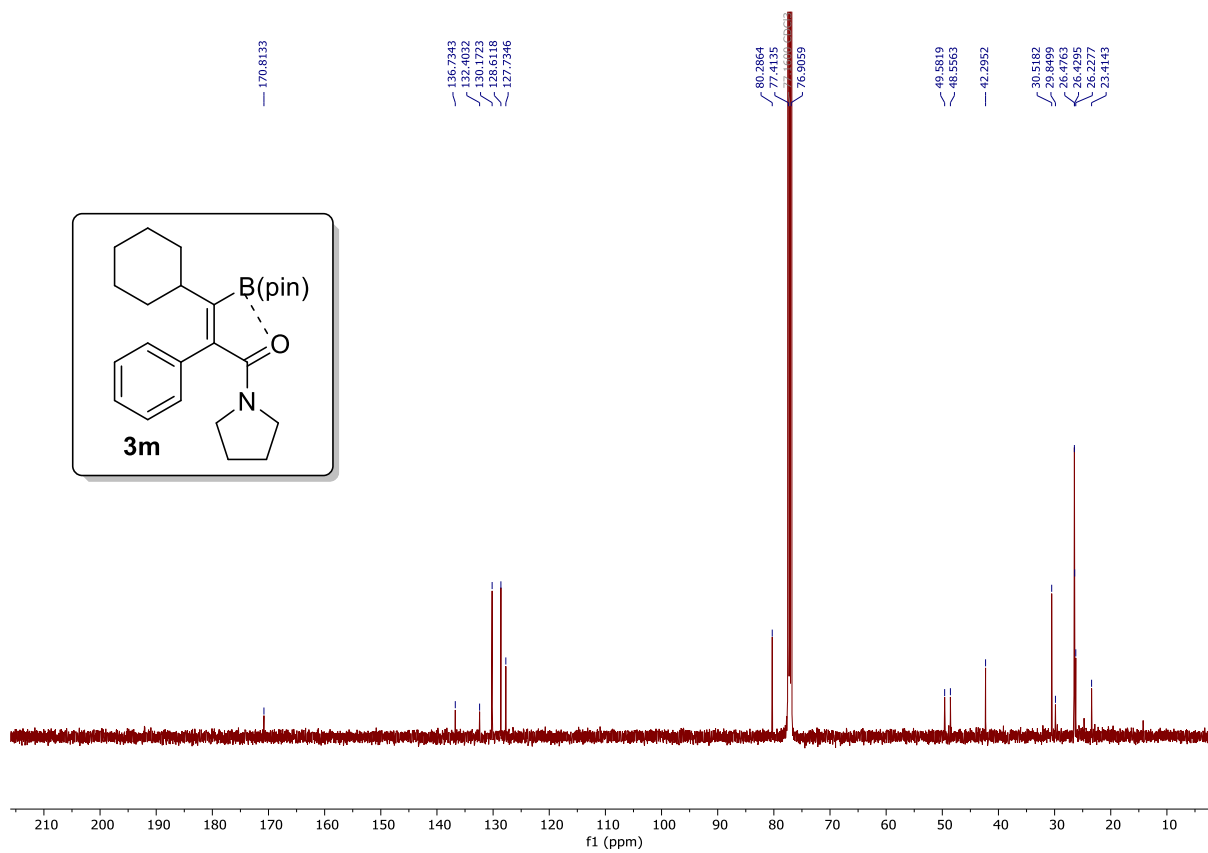

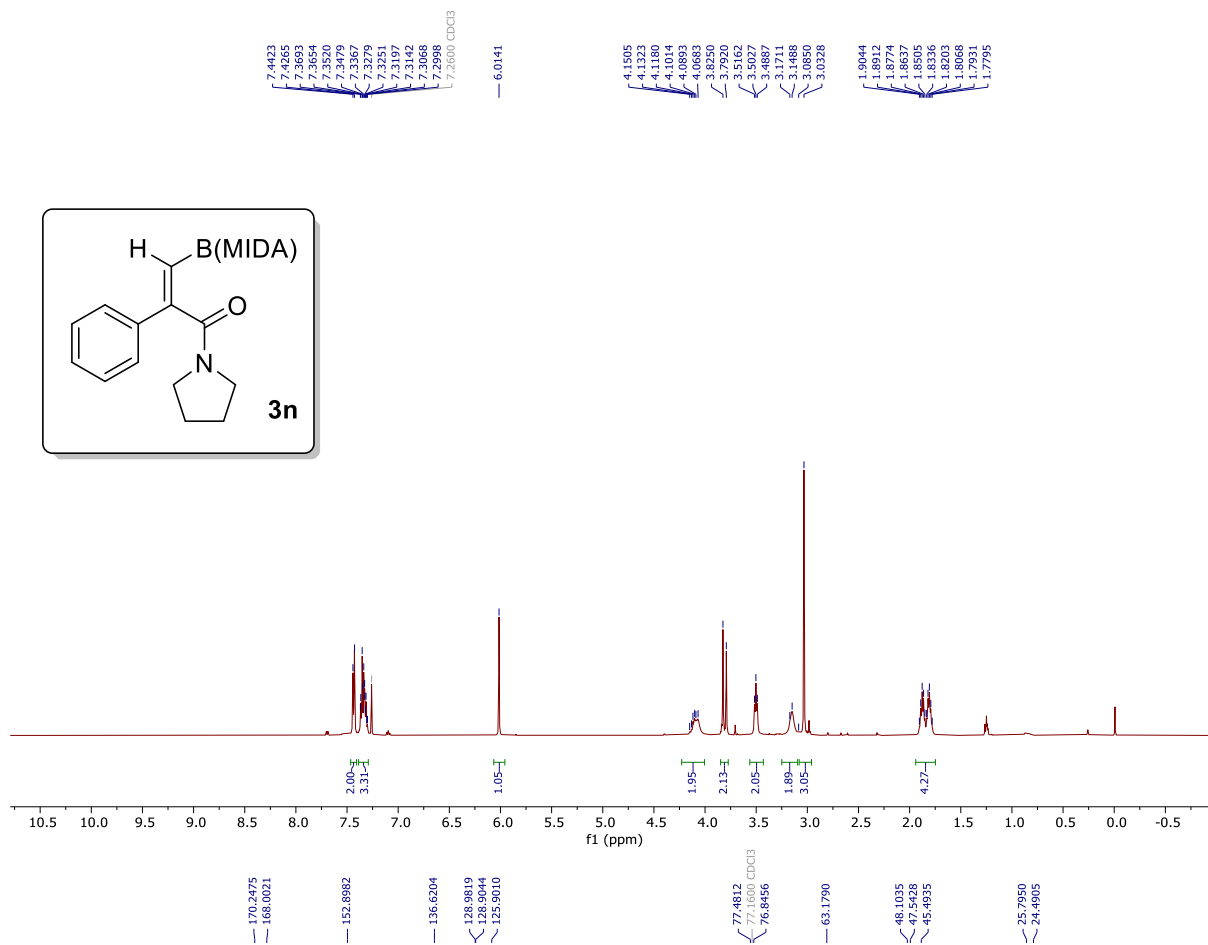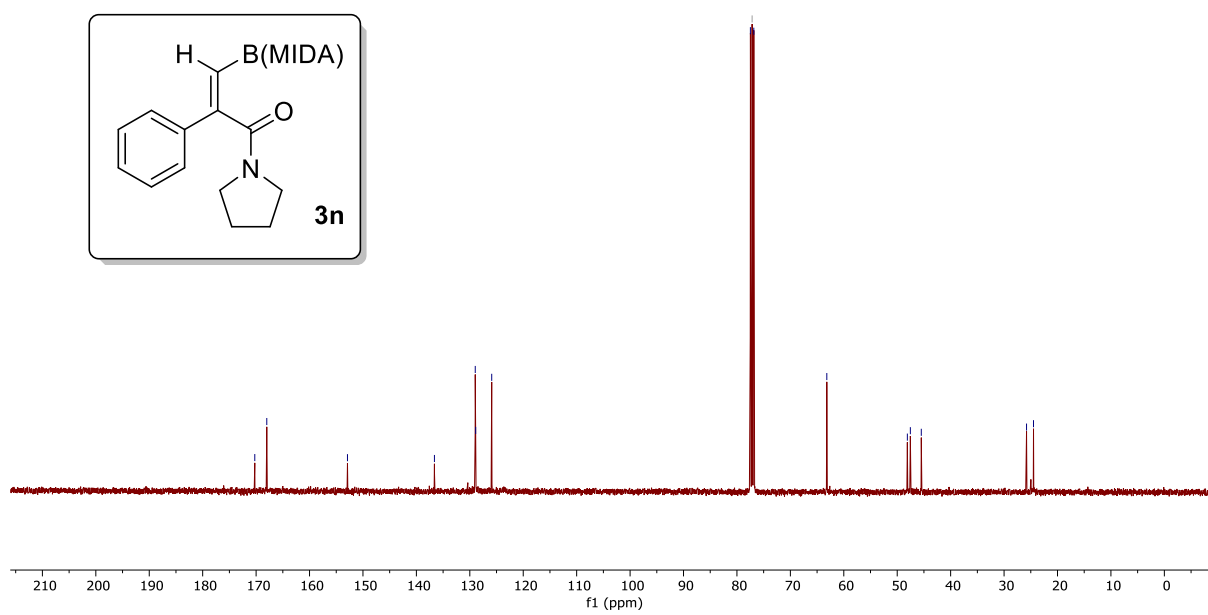

sp.dg481r.1.fid  
sp.dg481r-400 mhz

7.43248  
7.40796  
7.37790  
7.36266  
7.34322  
7.32217  
7.26000  
7.26000 CDCl3

5.9814

3.92218  
3.88828  
3.78866  
3.74466  
3.74161  
3.67666  
3.66619  
3.64490  
3.22223  
3.20377  
3.11588  
3.11588  
3.09987  
3.01510

1.2069  
1.18889  
1.17710  
0.93229  
0.91148  
0.89669

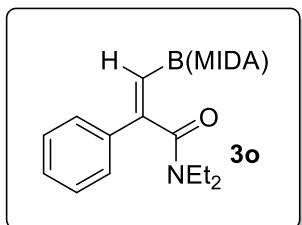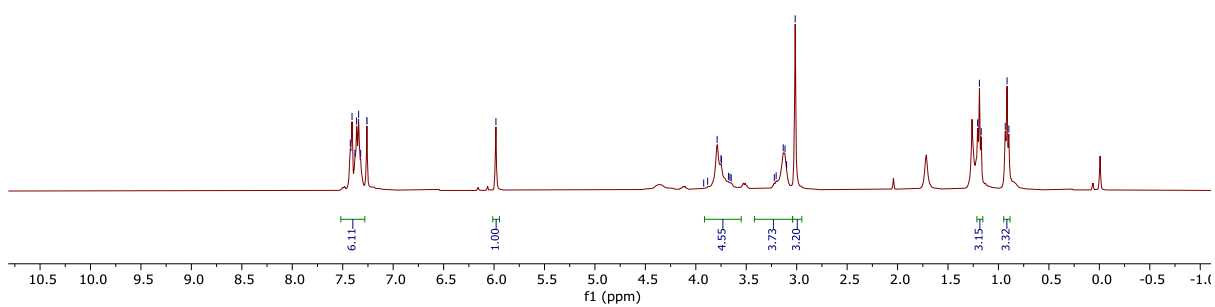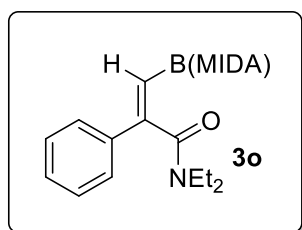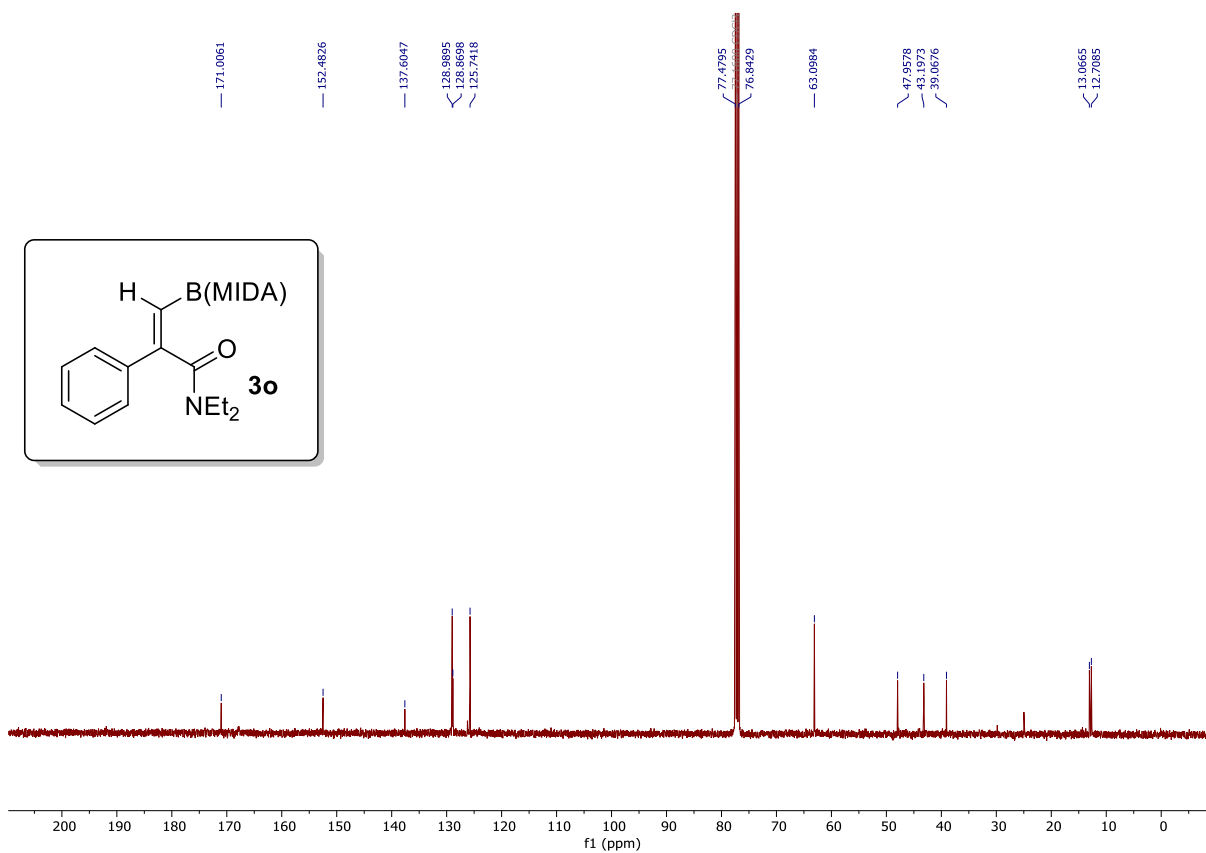

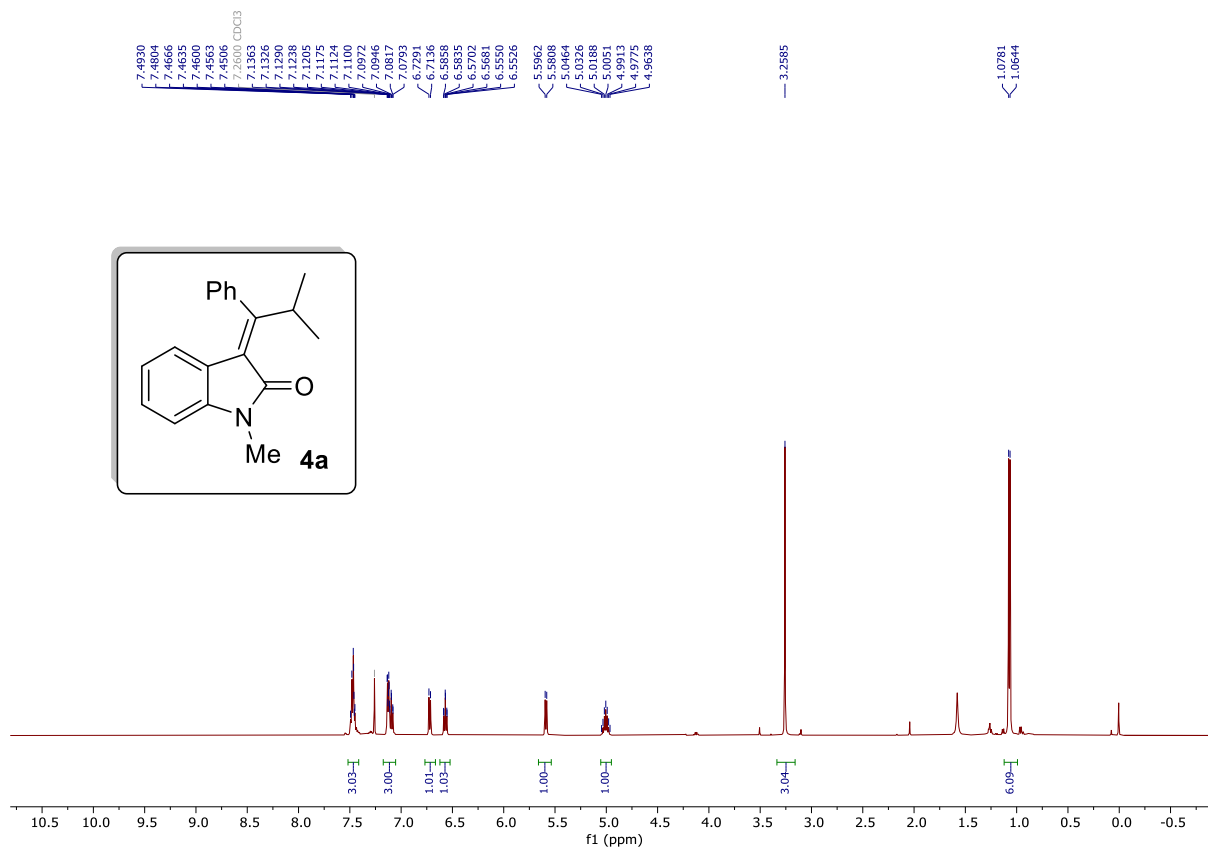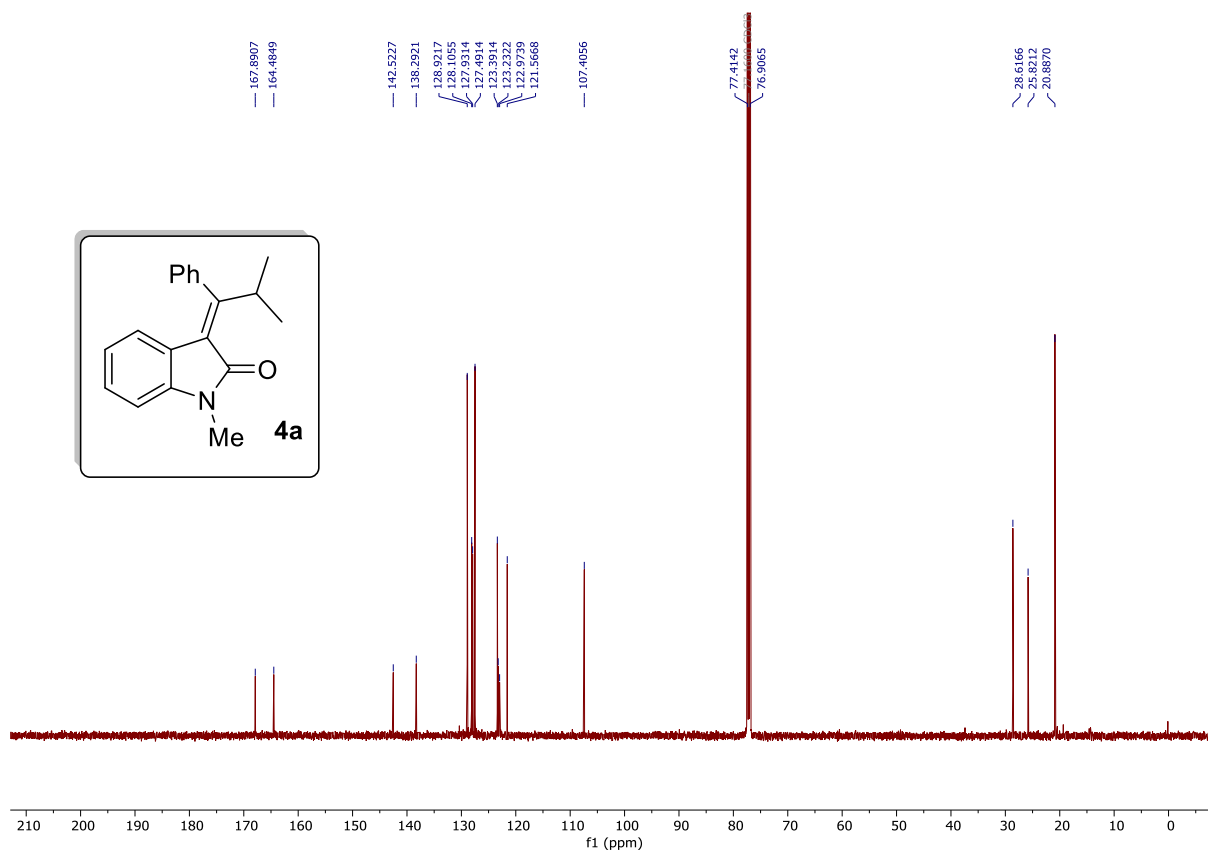

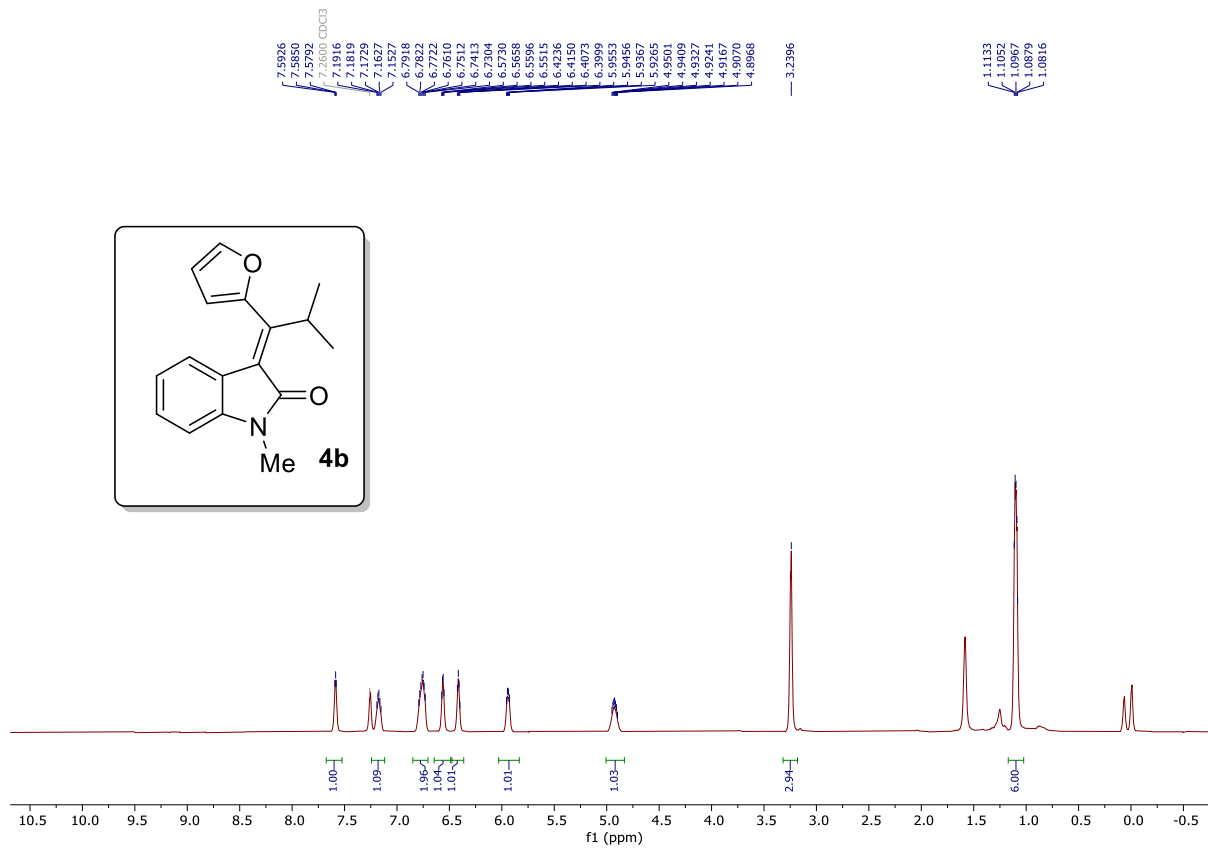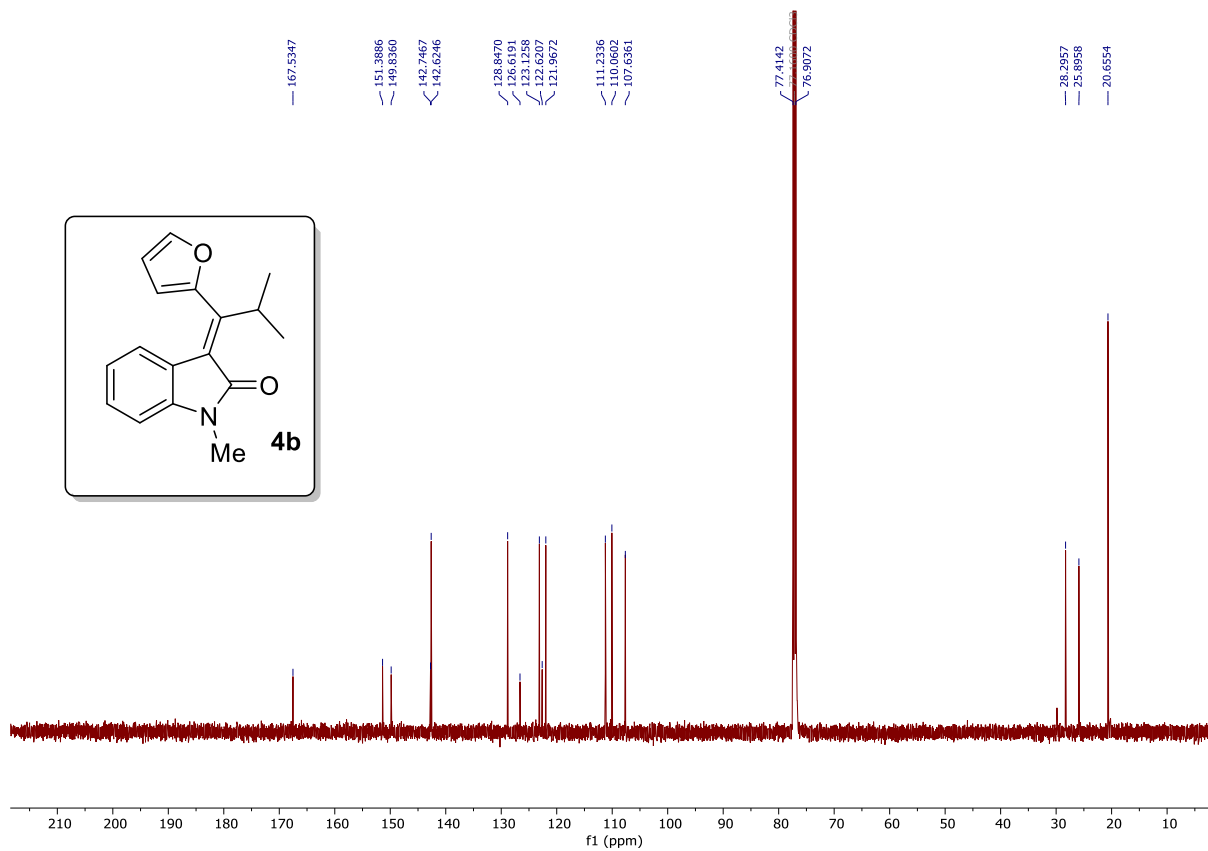

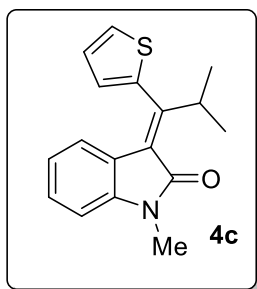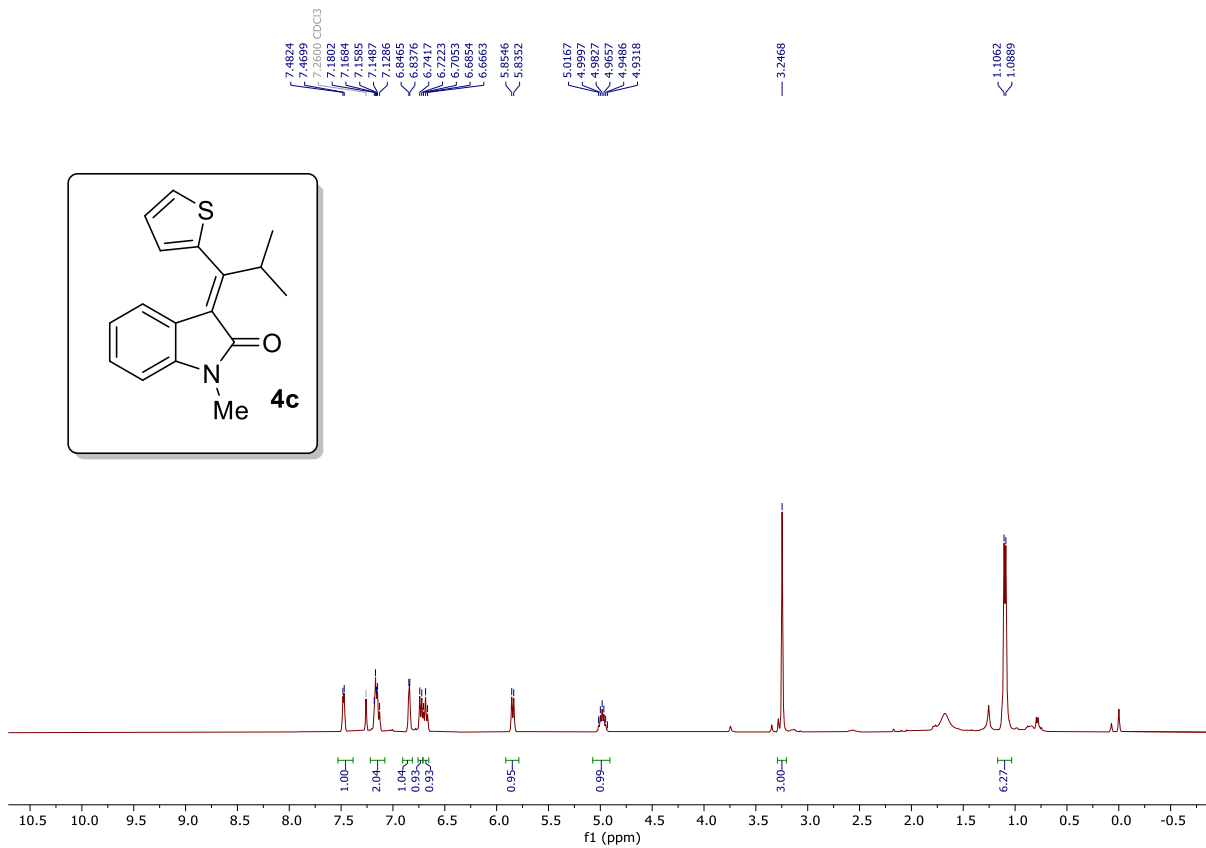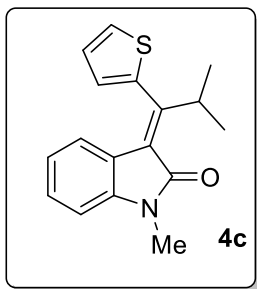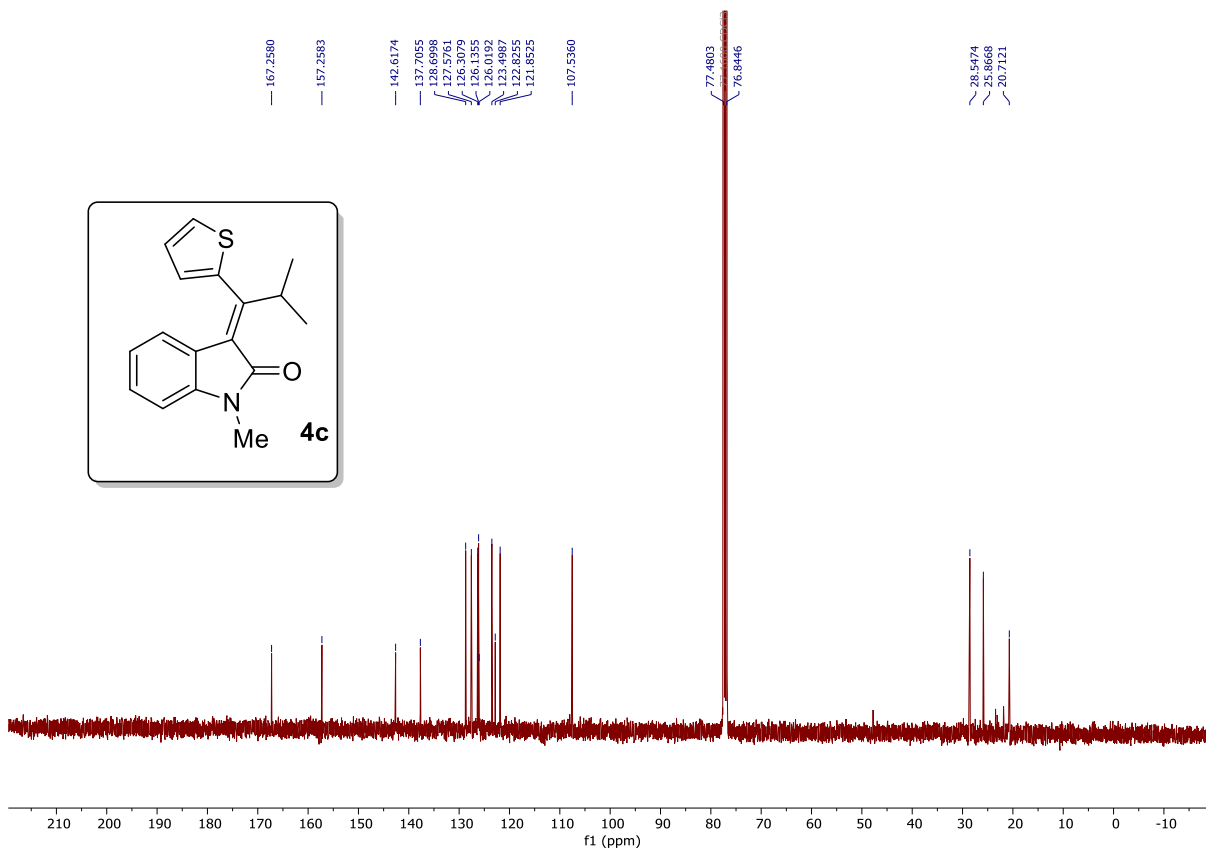

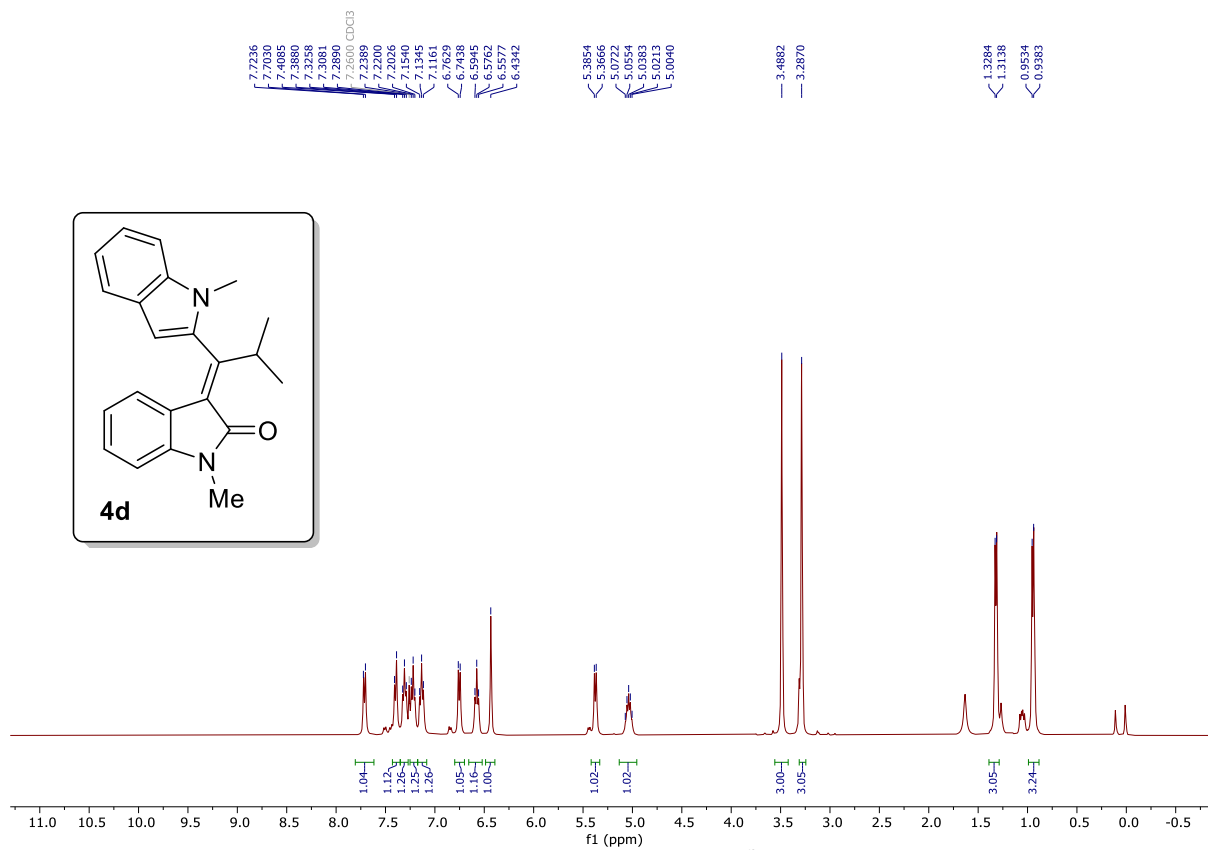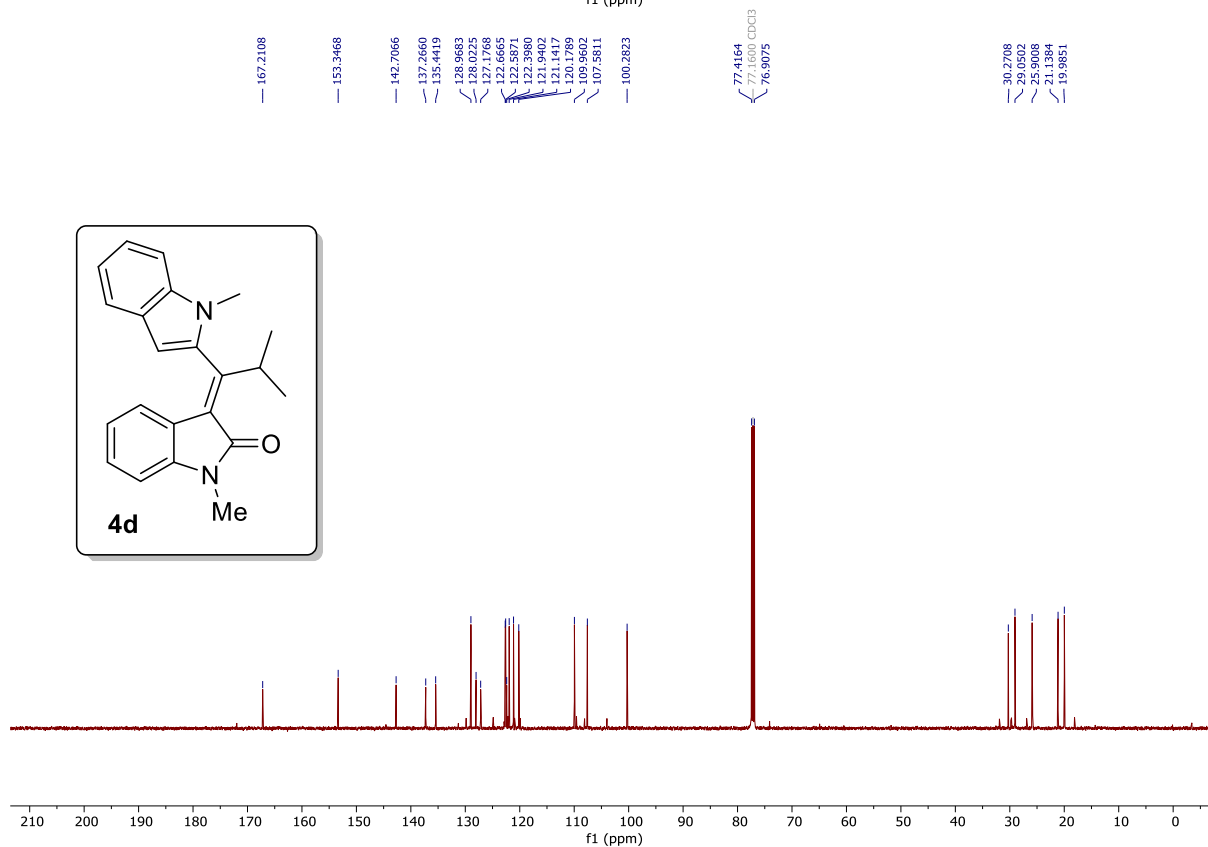

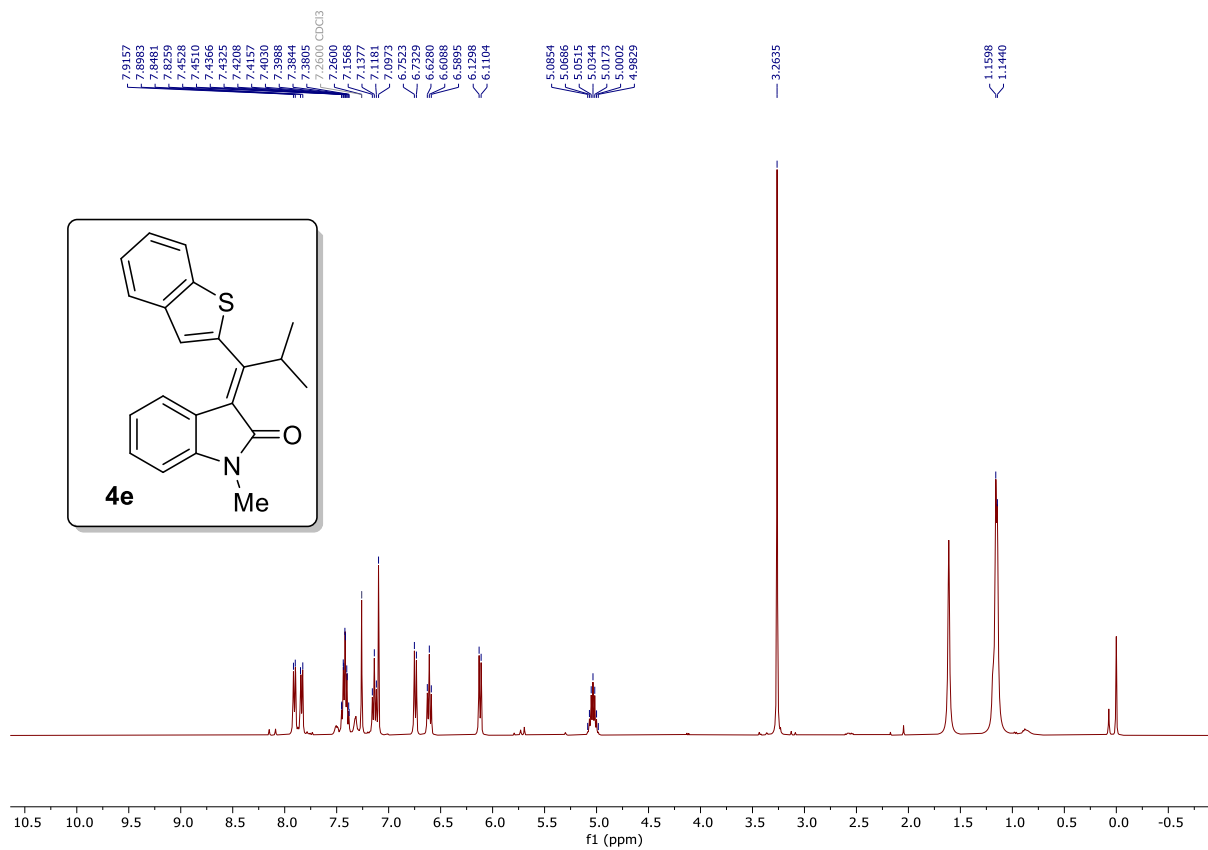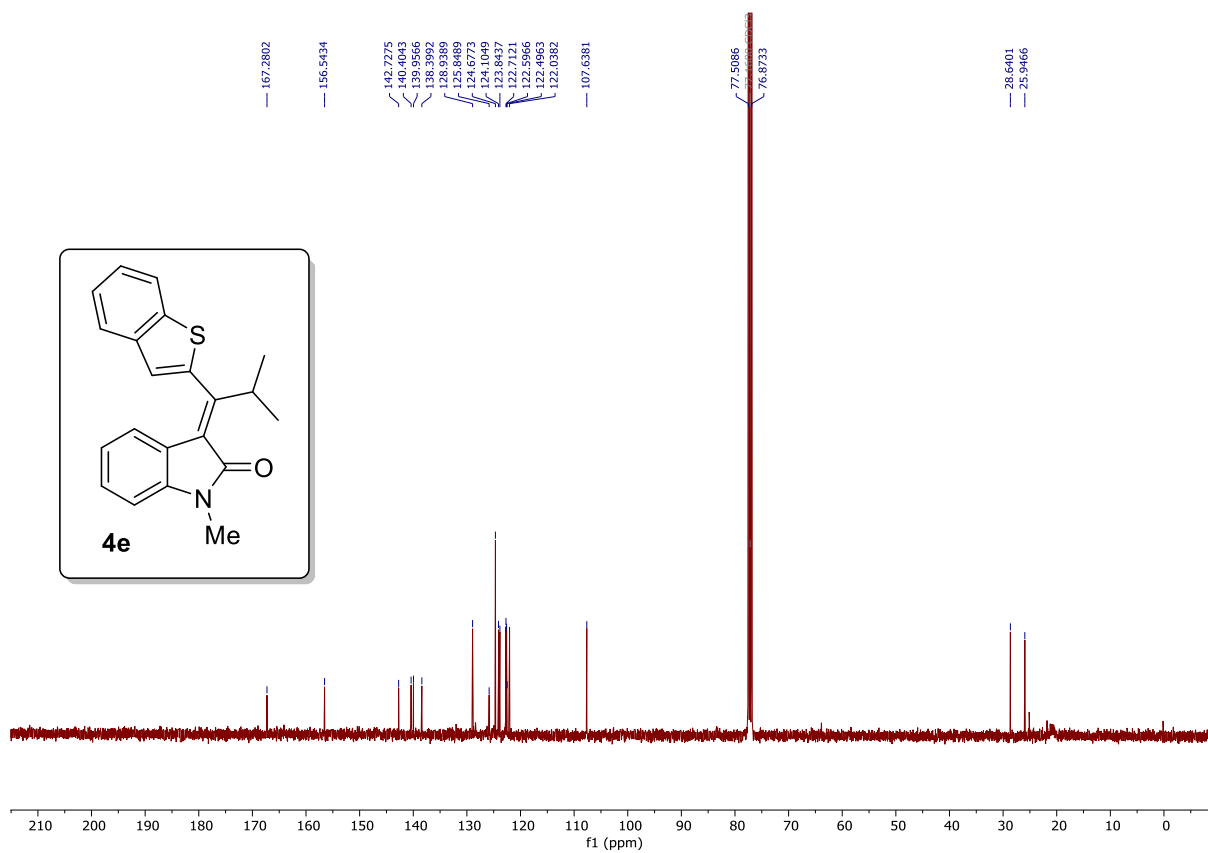



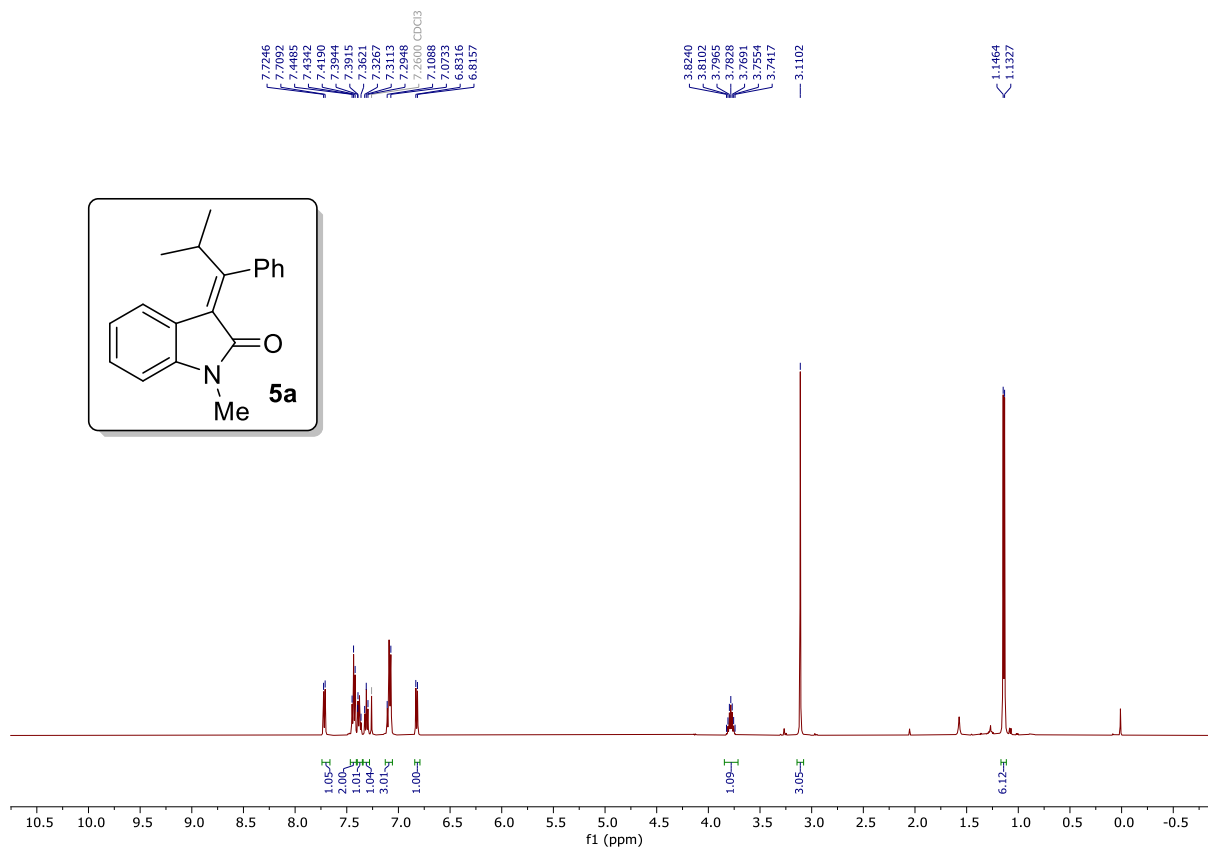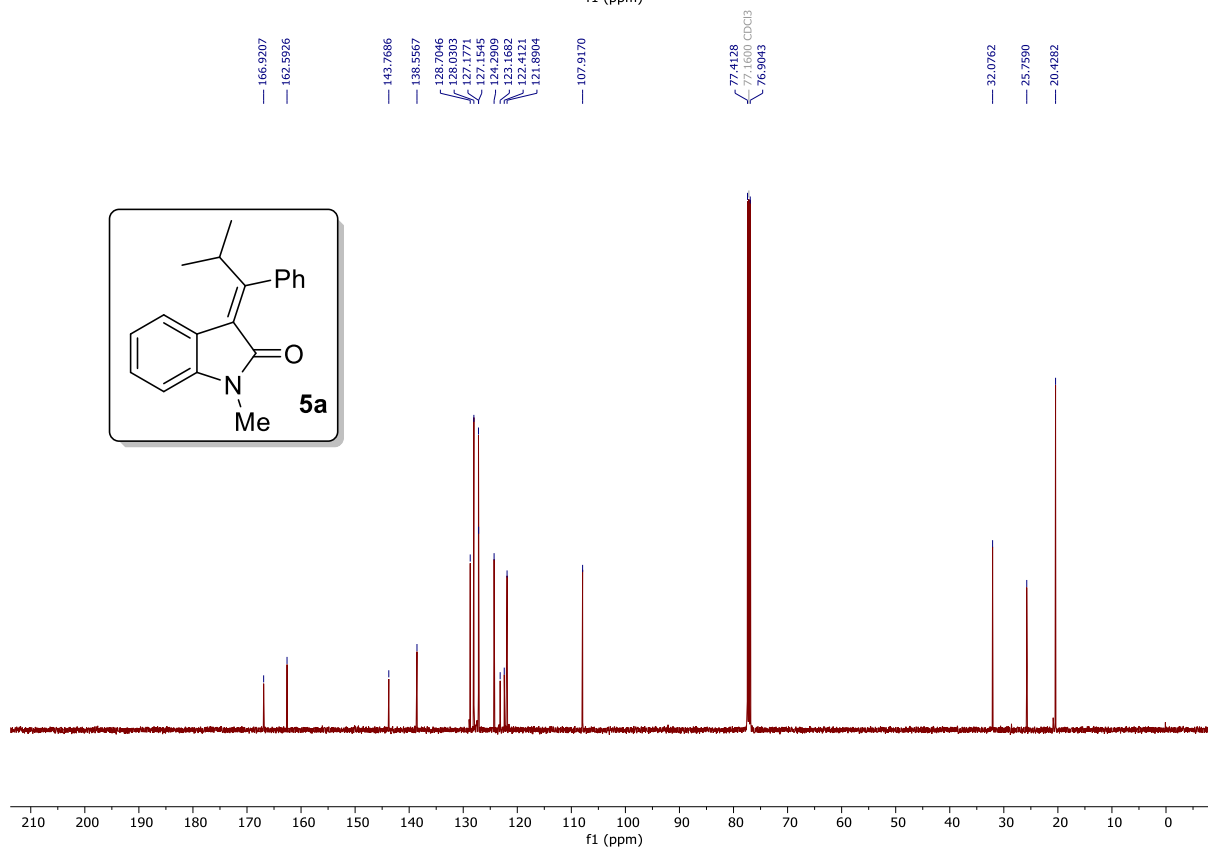

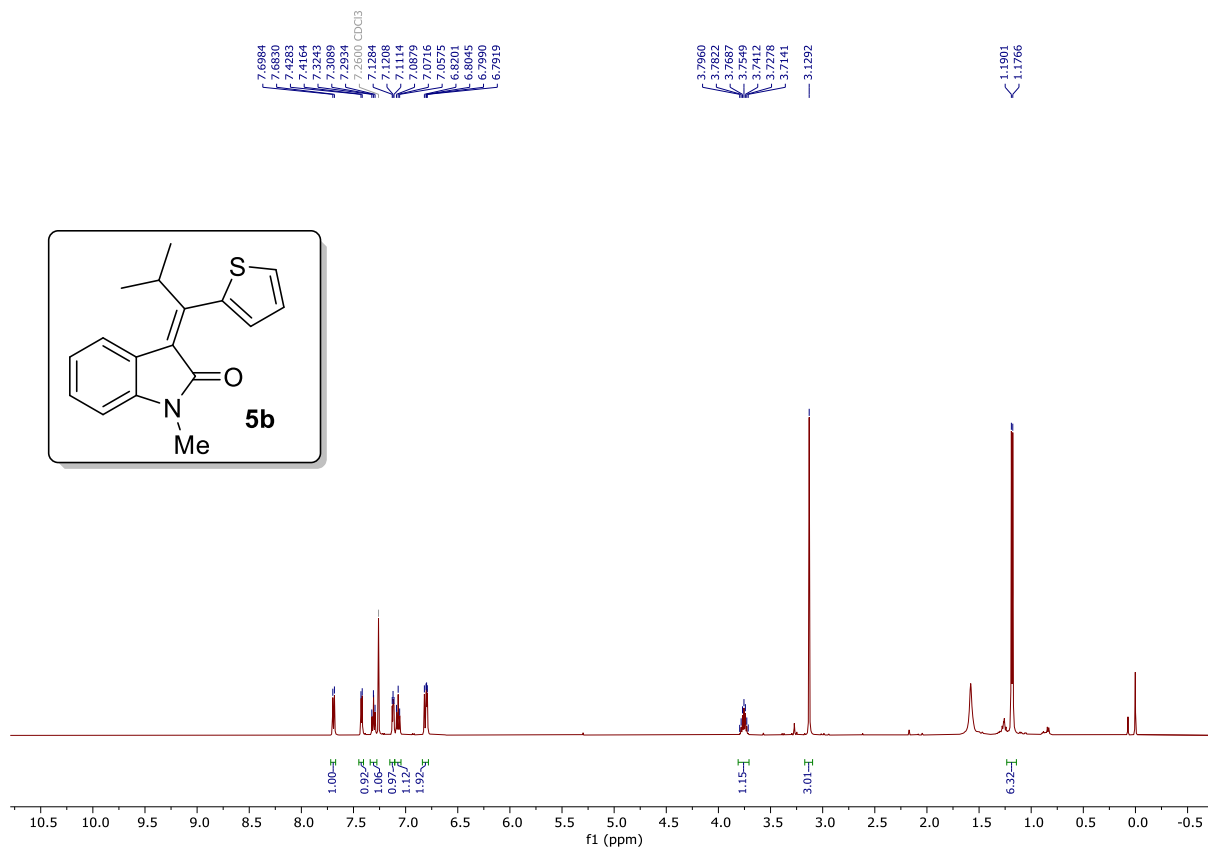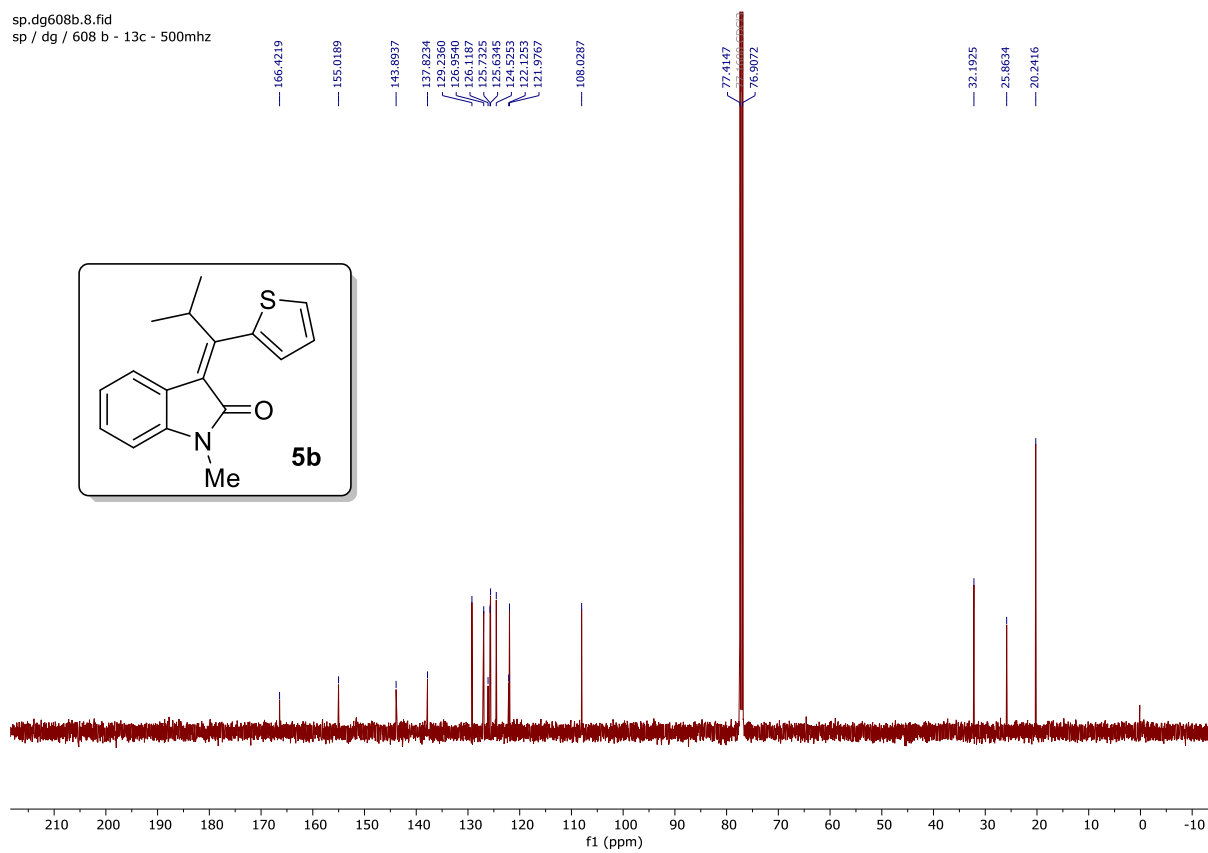

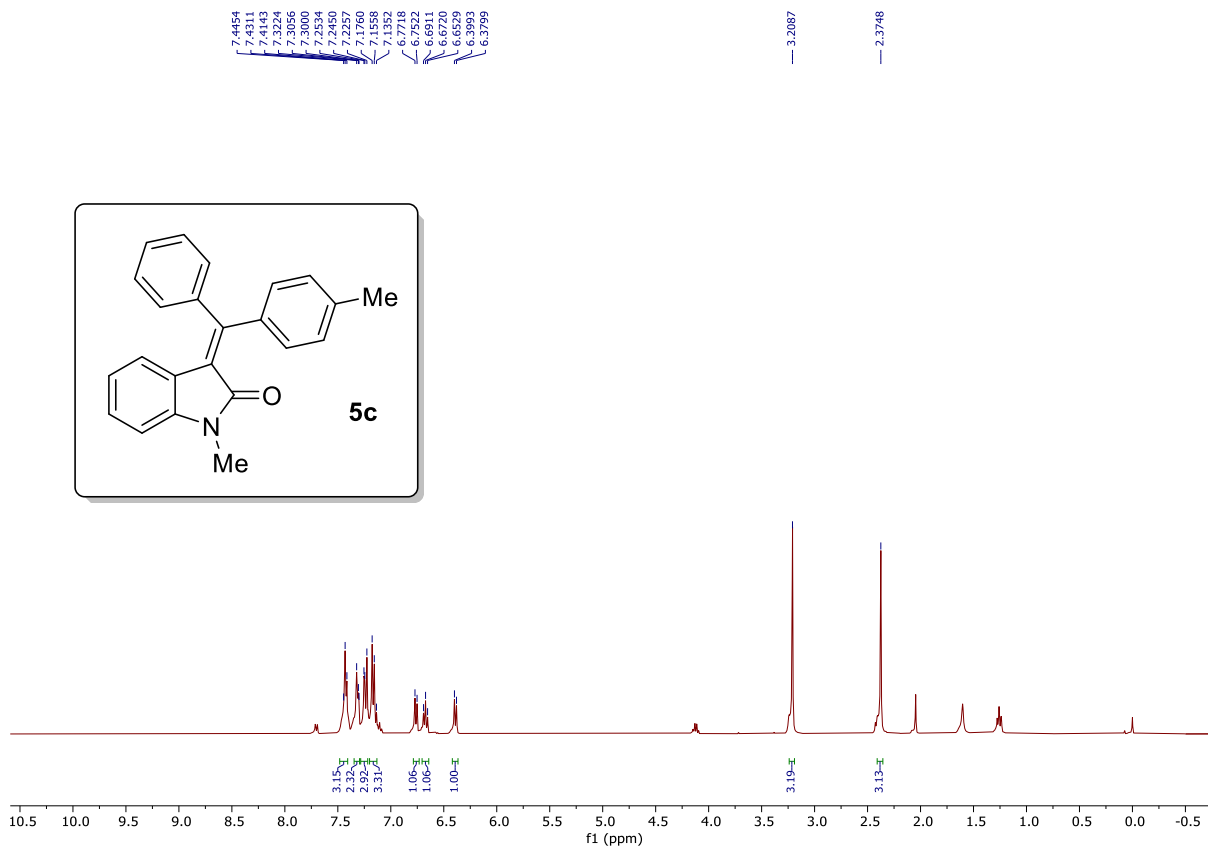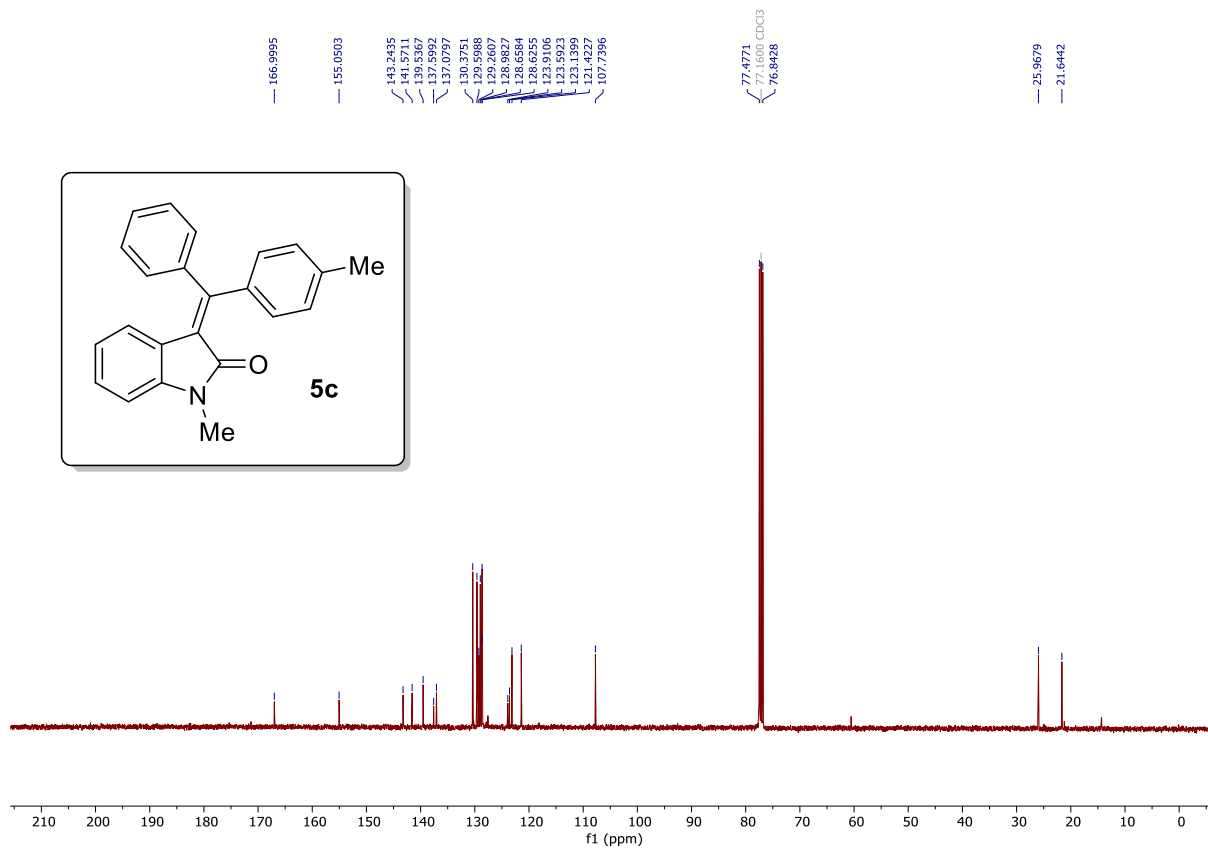

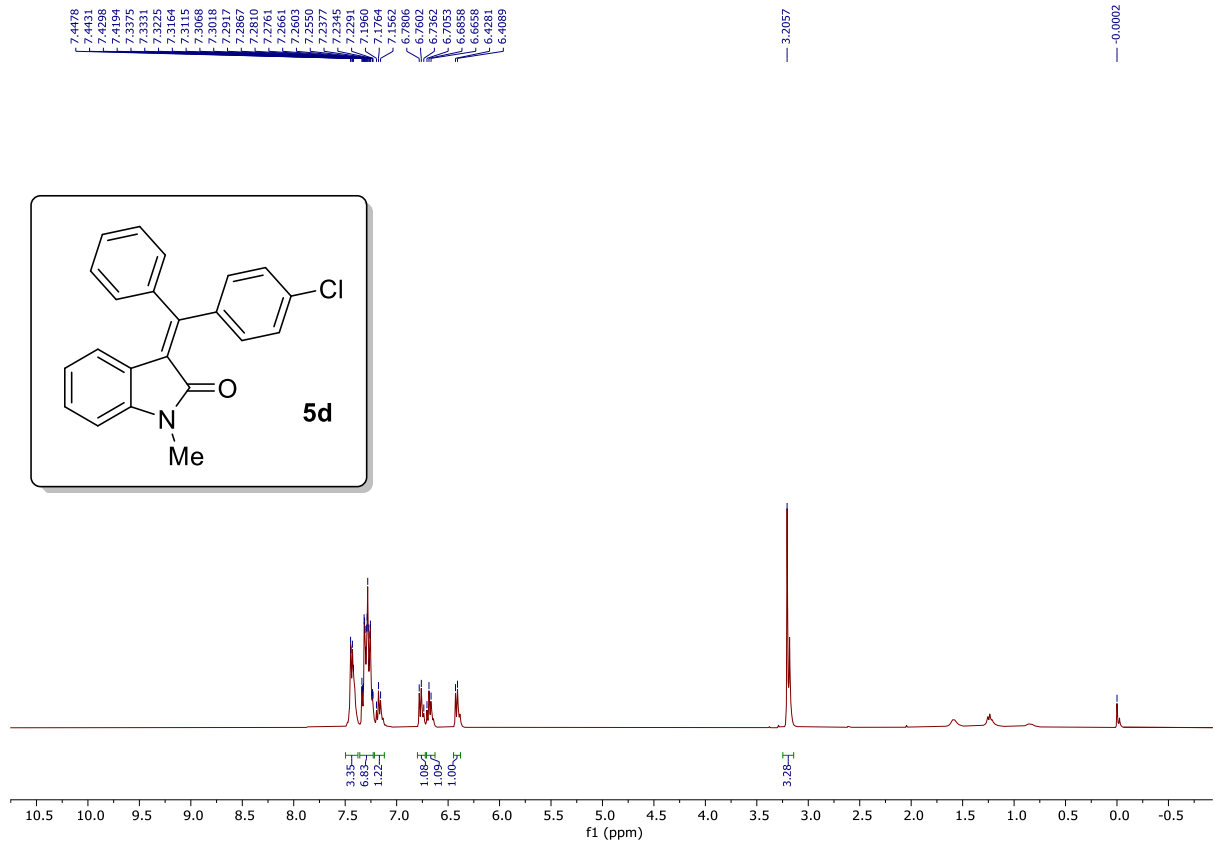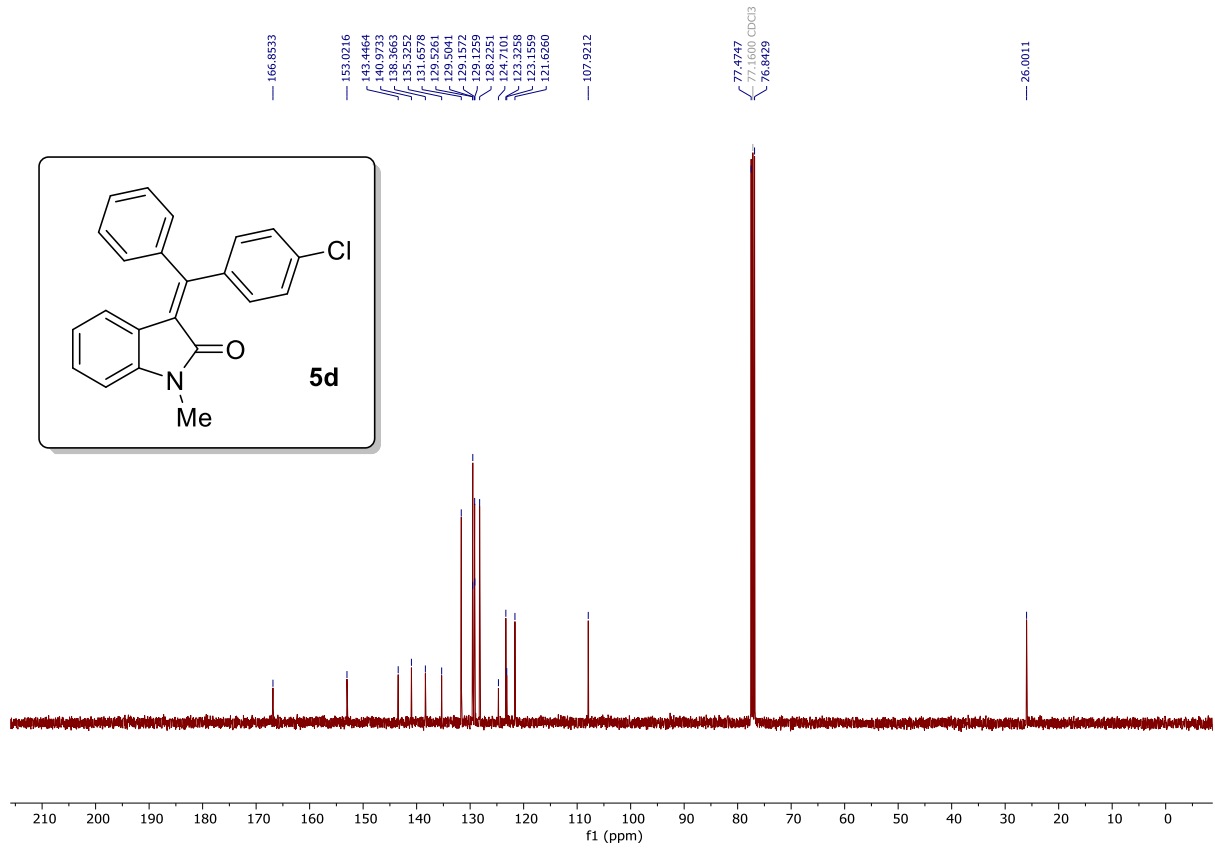

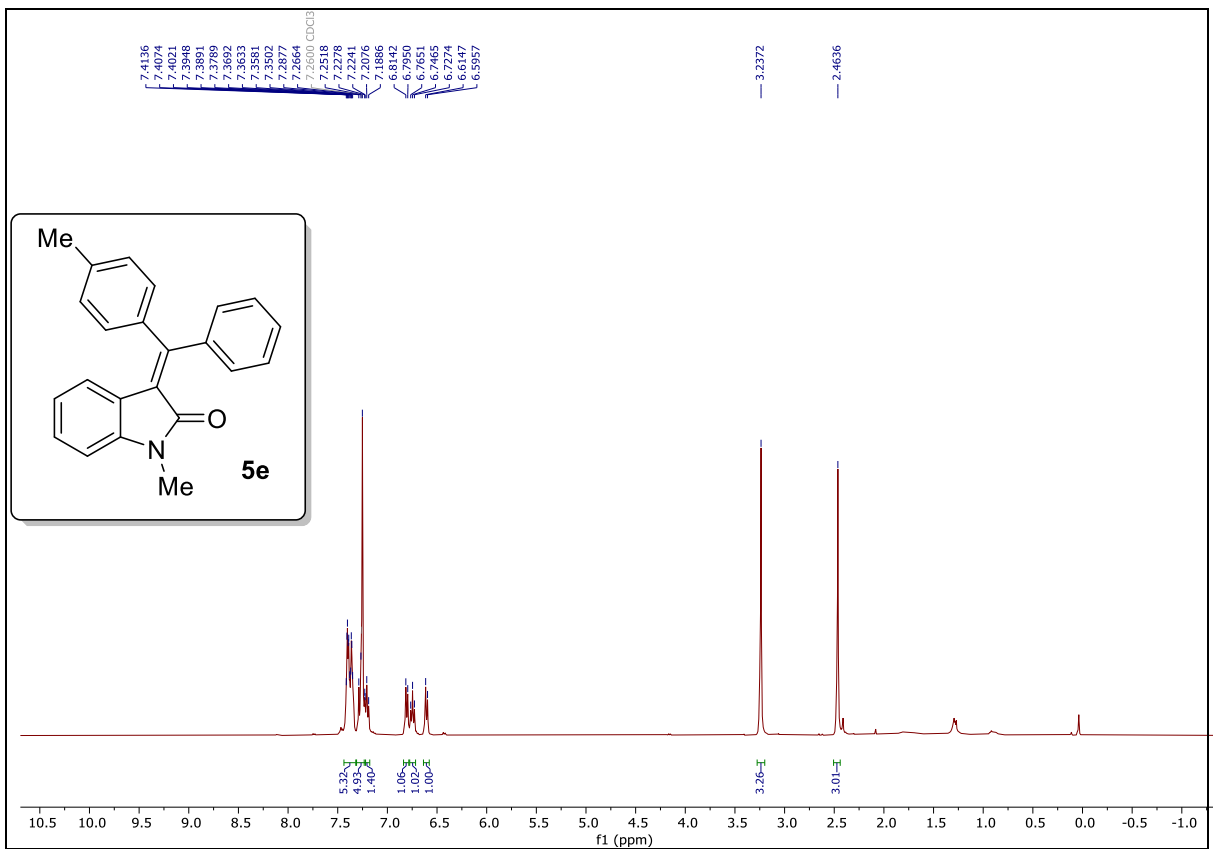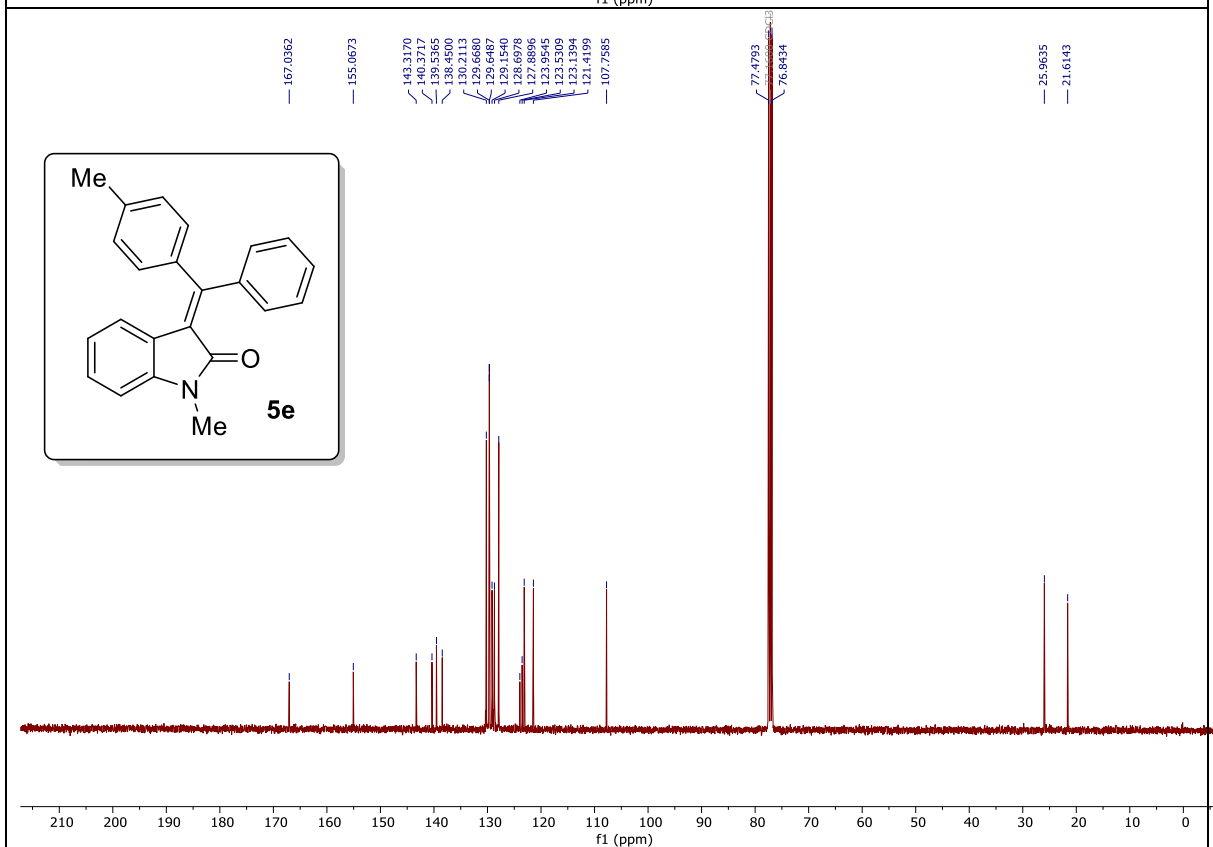

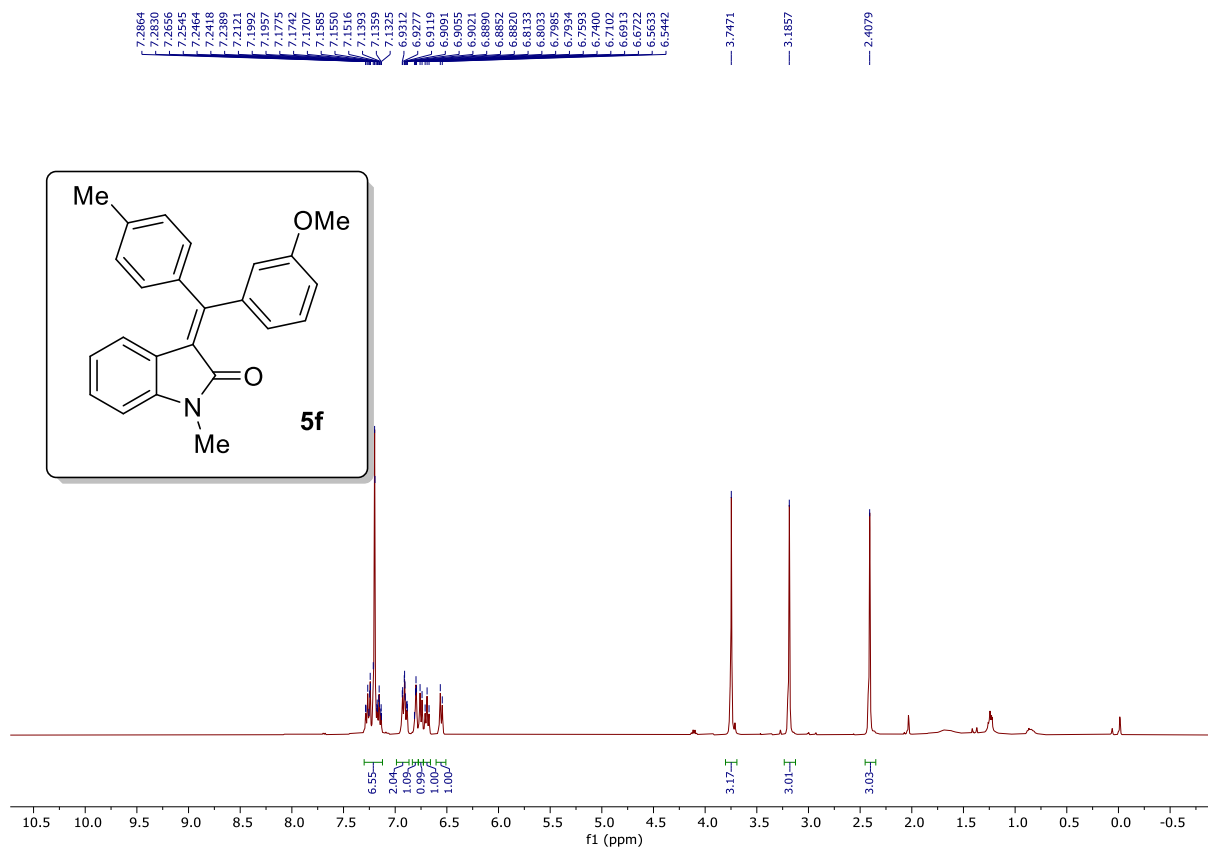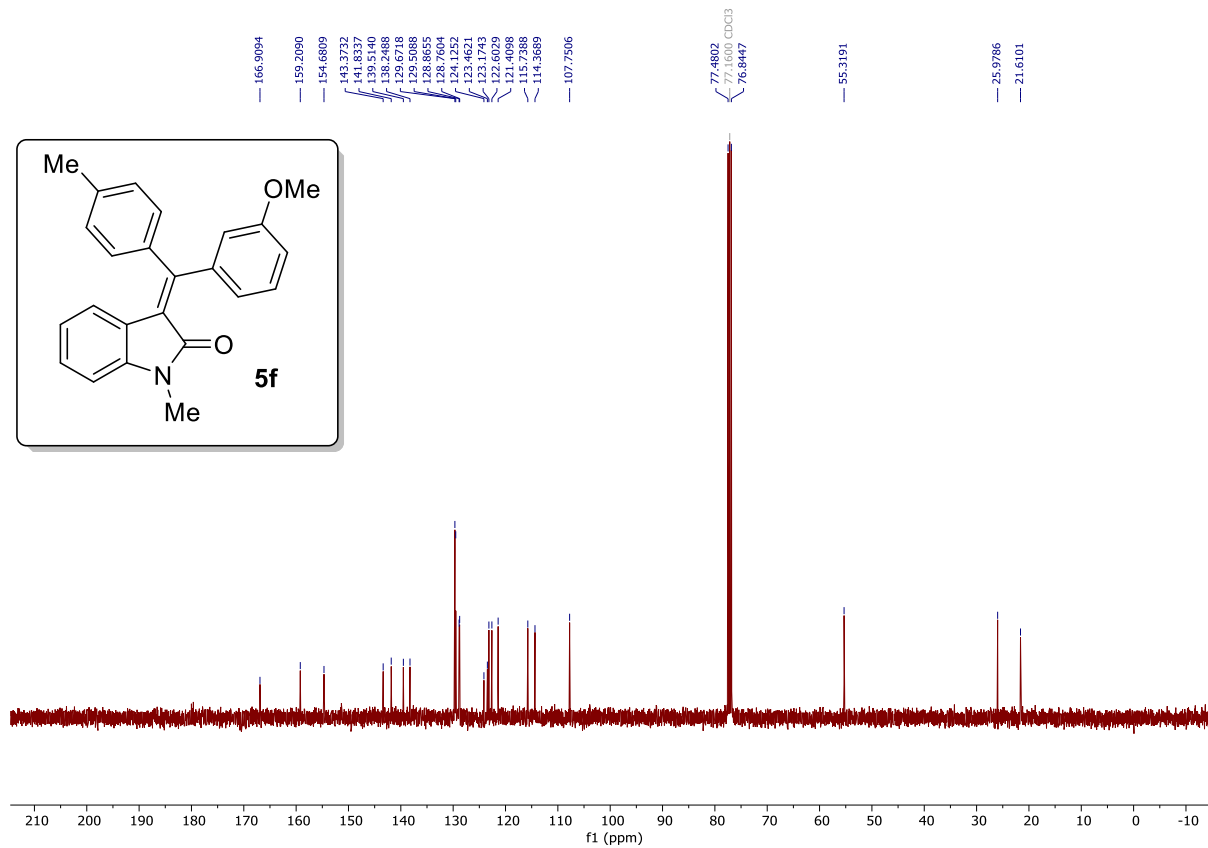

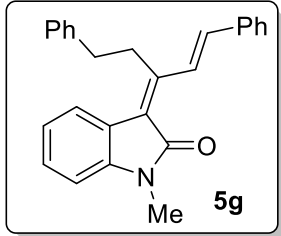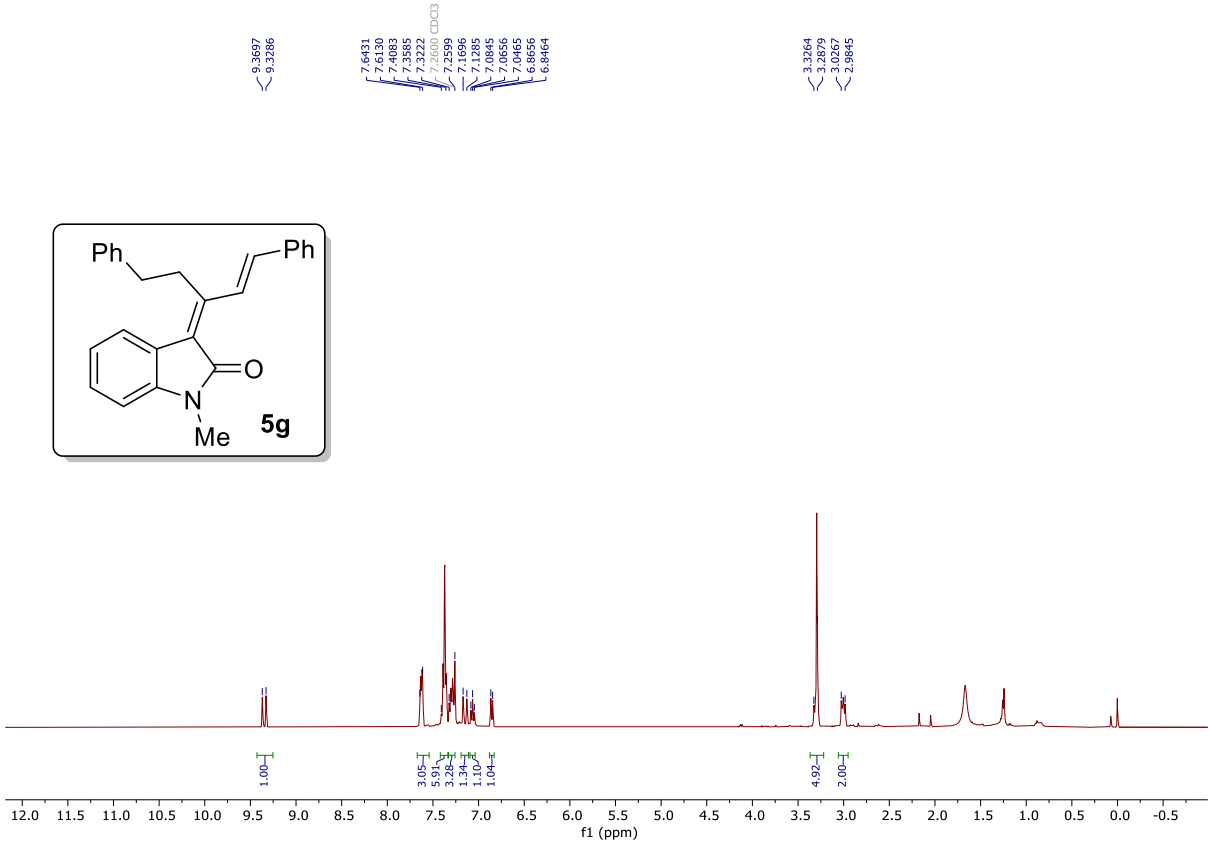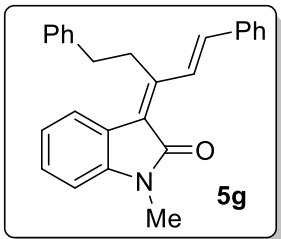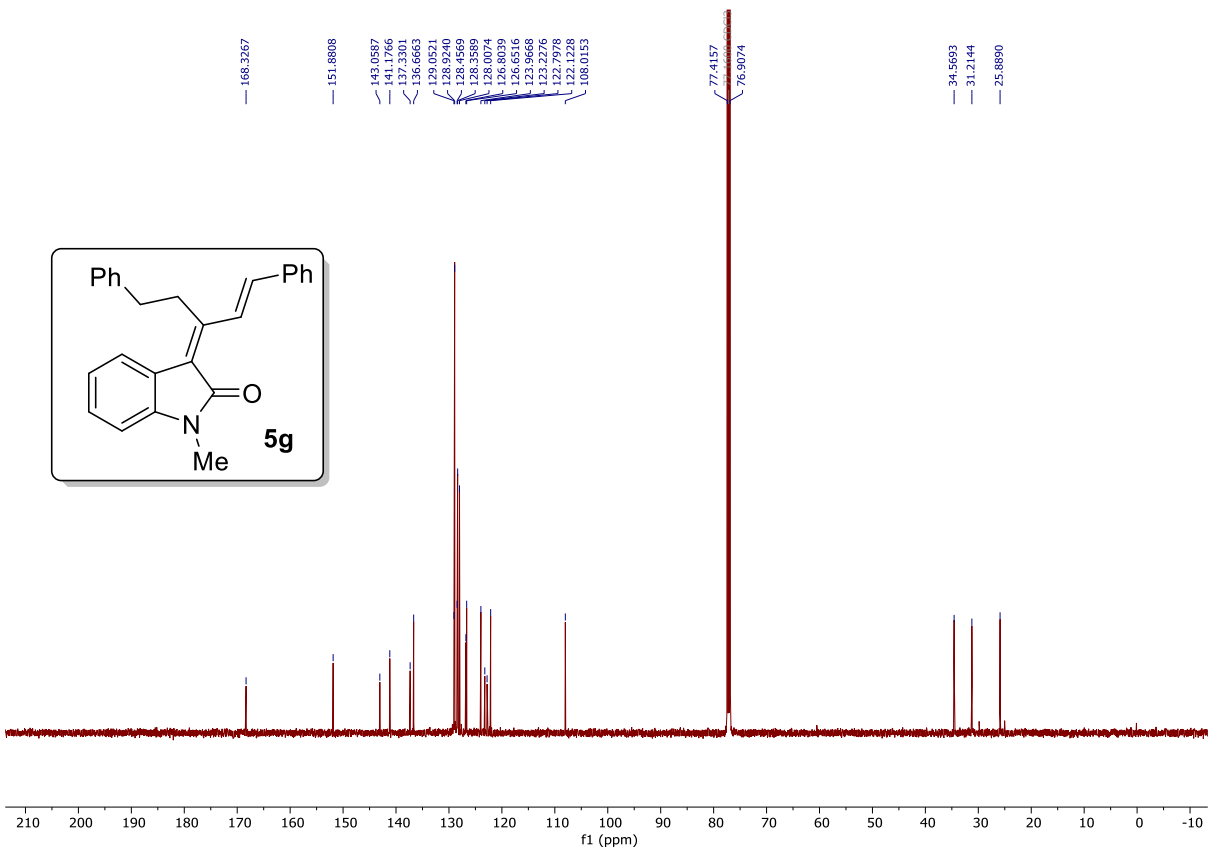

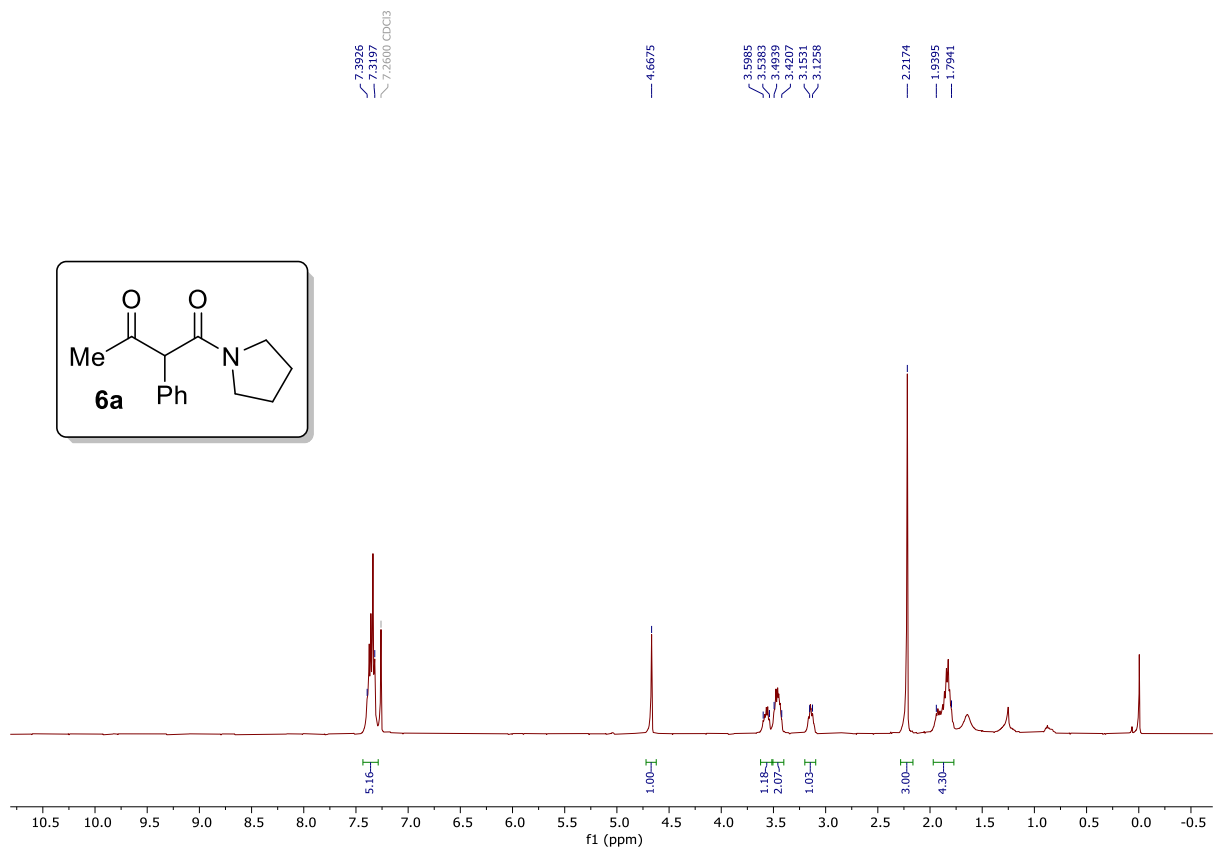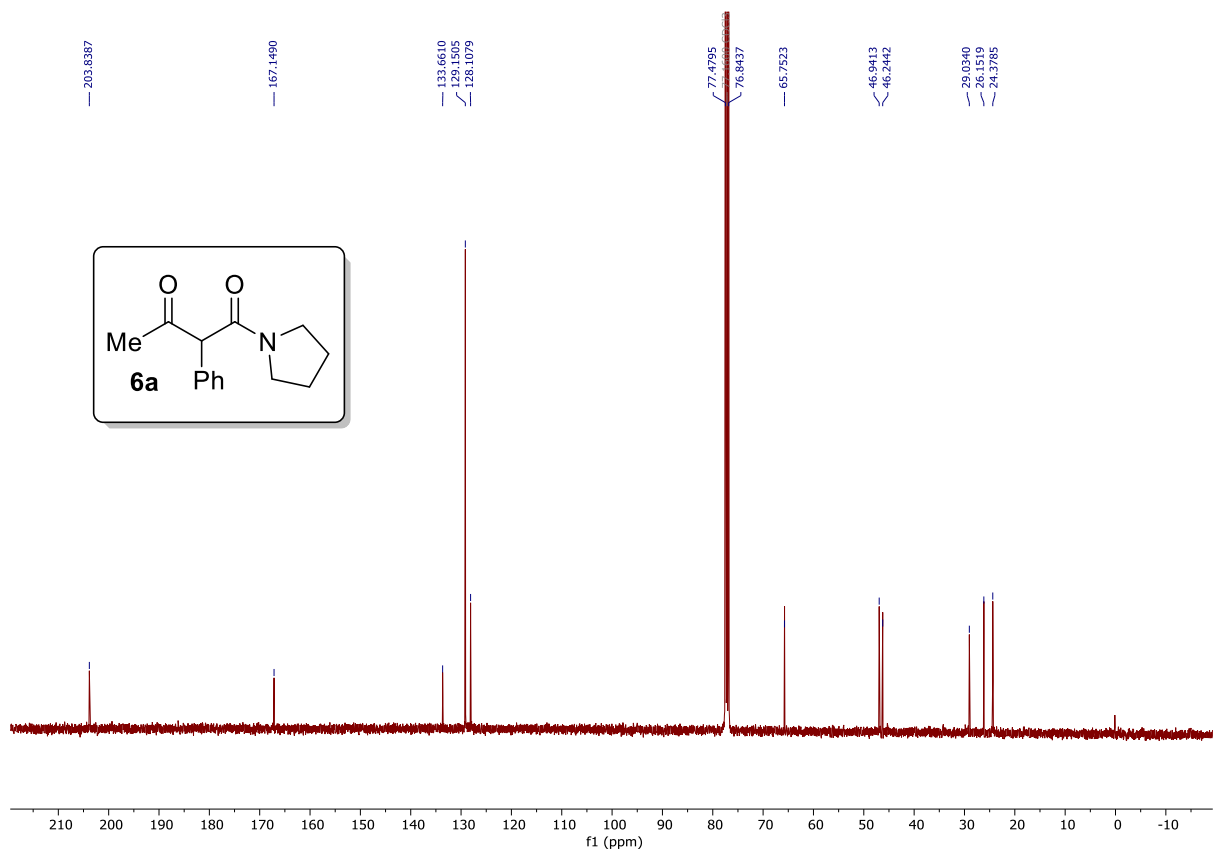



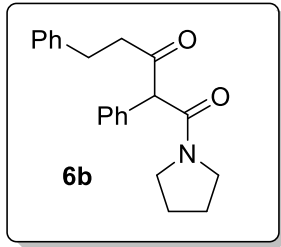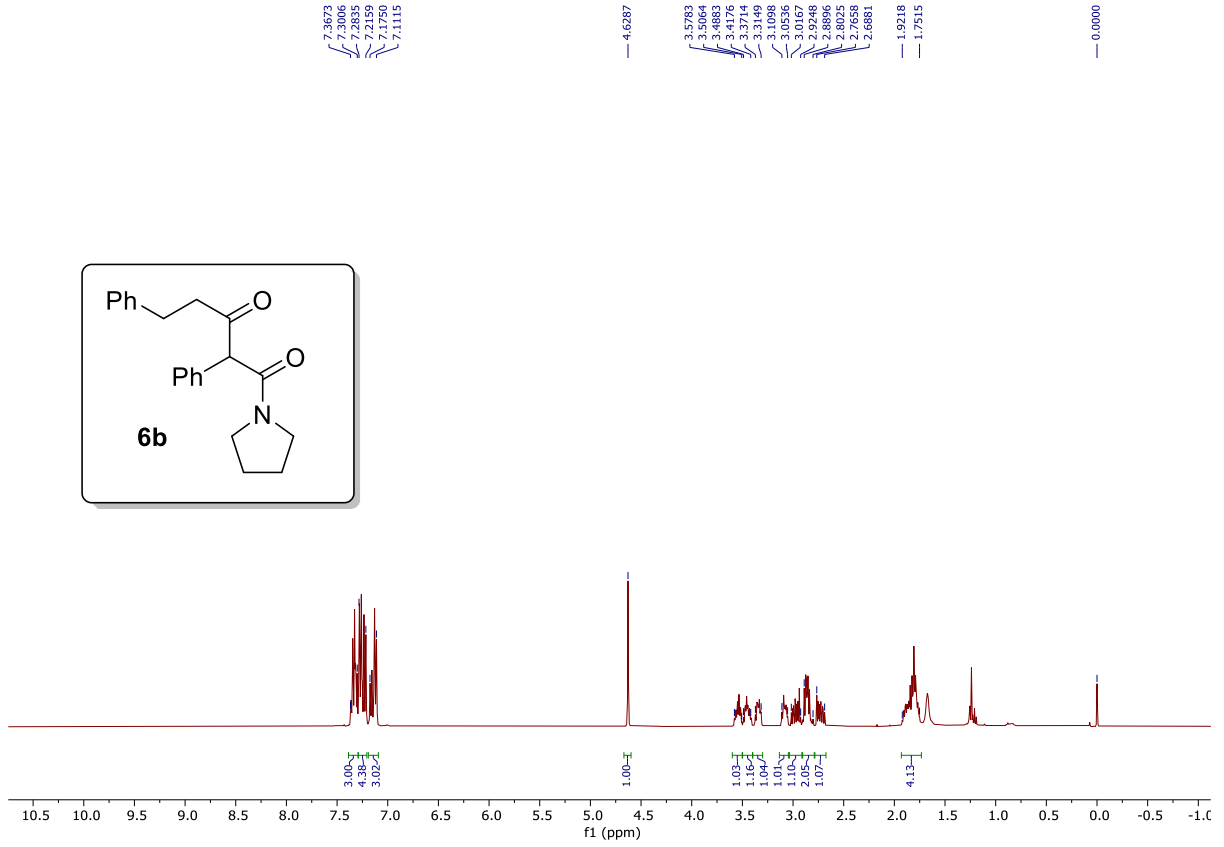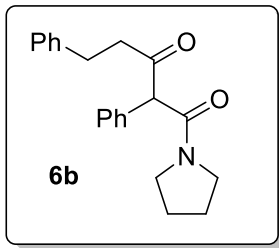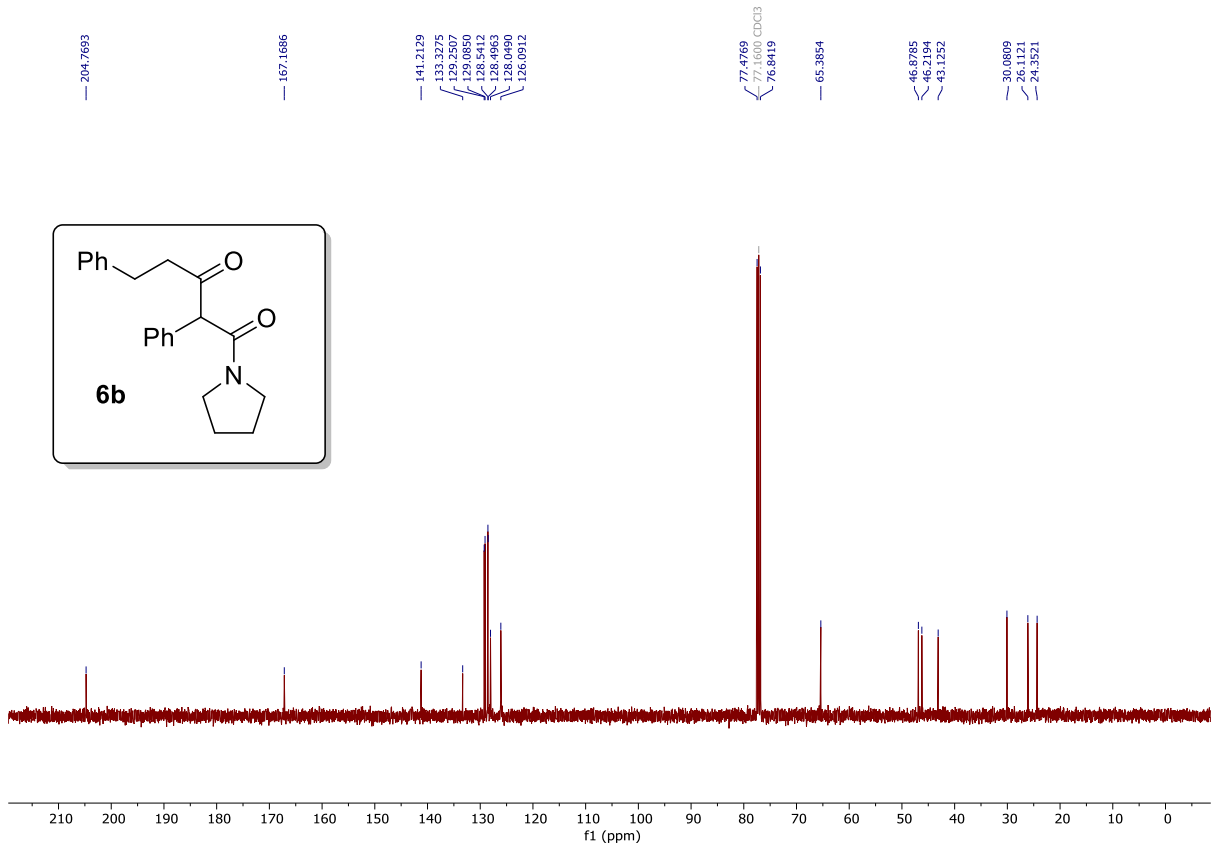

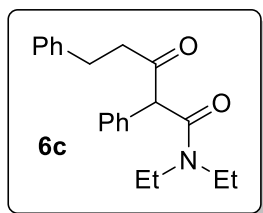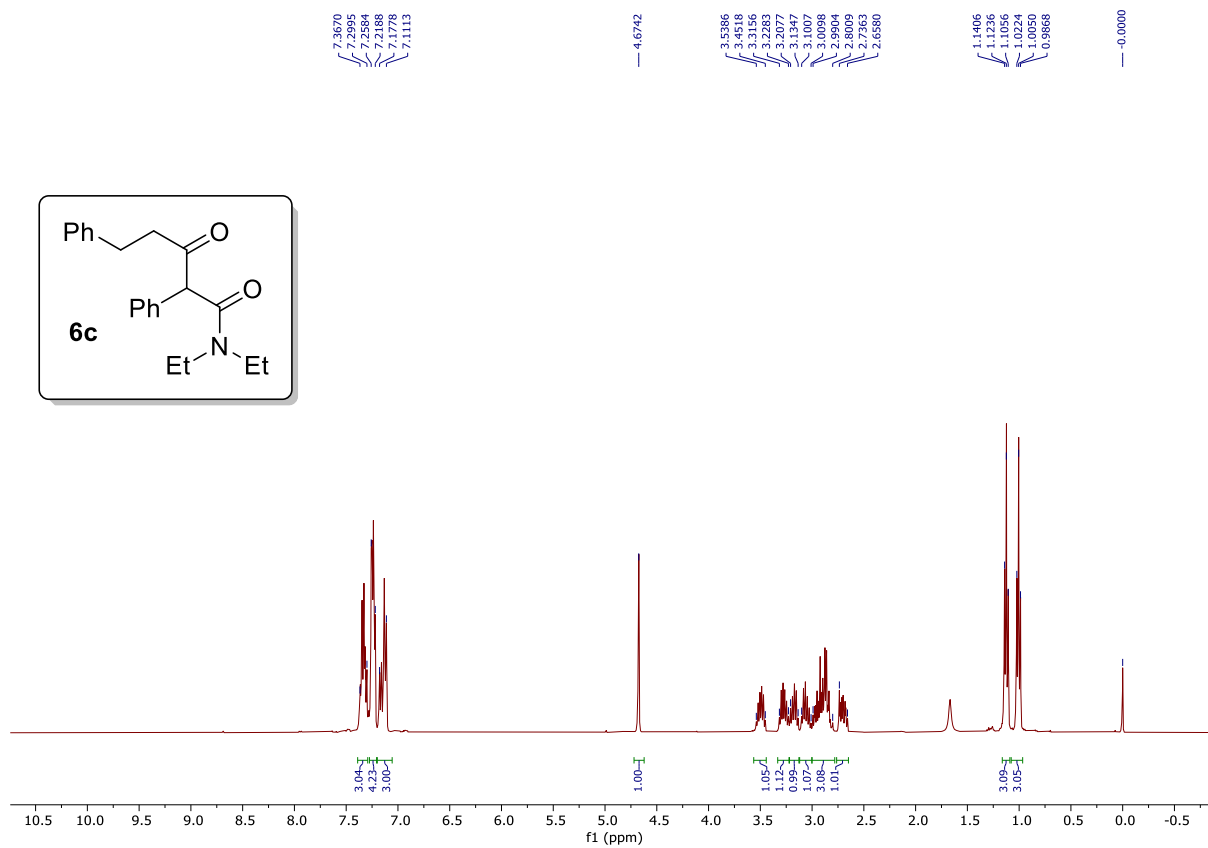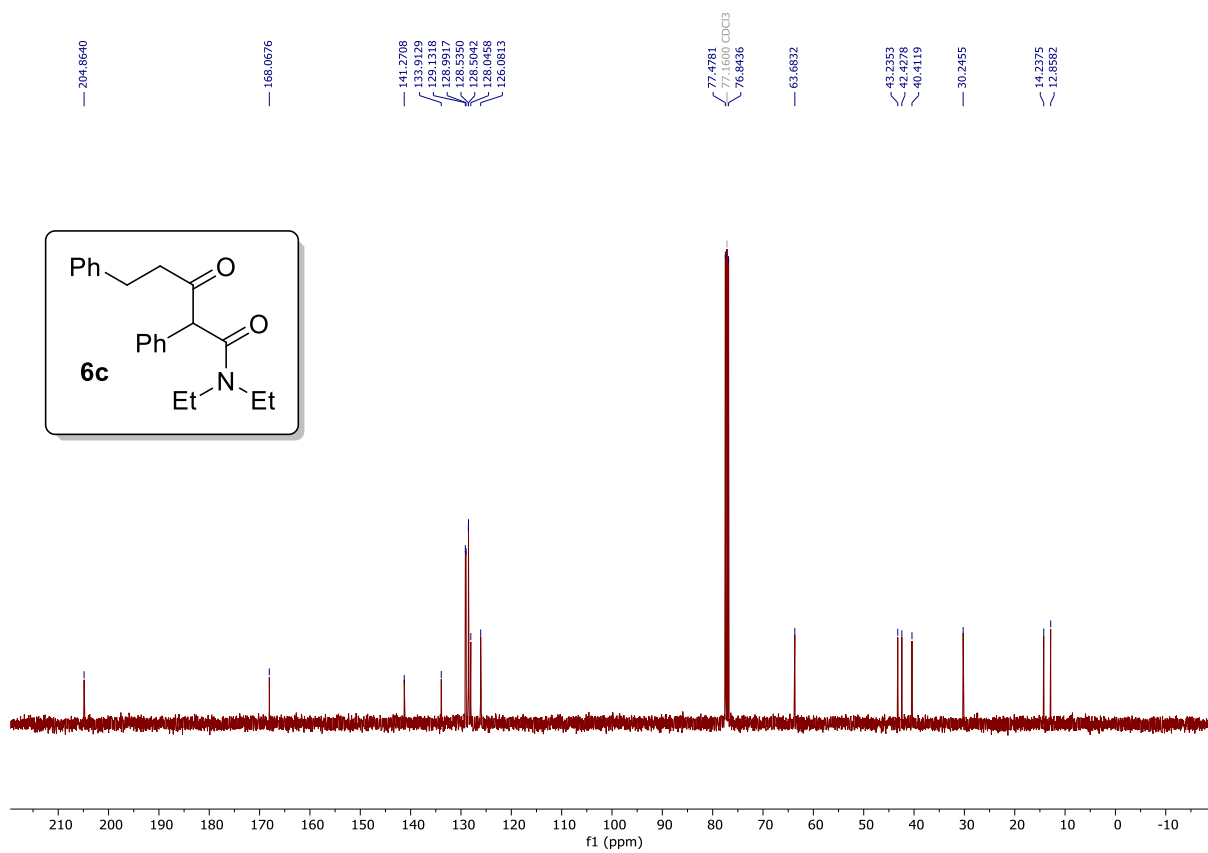

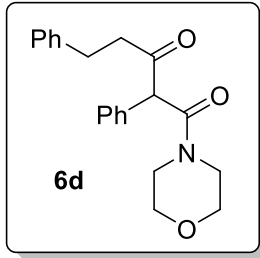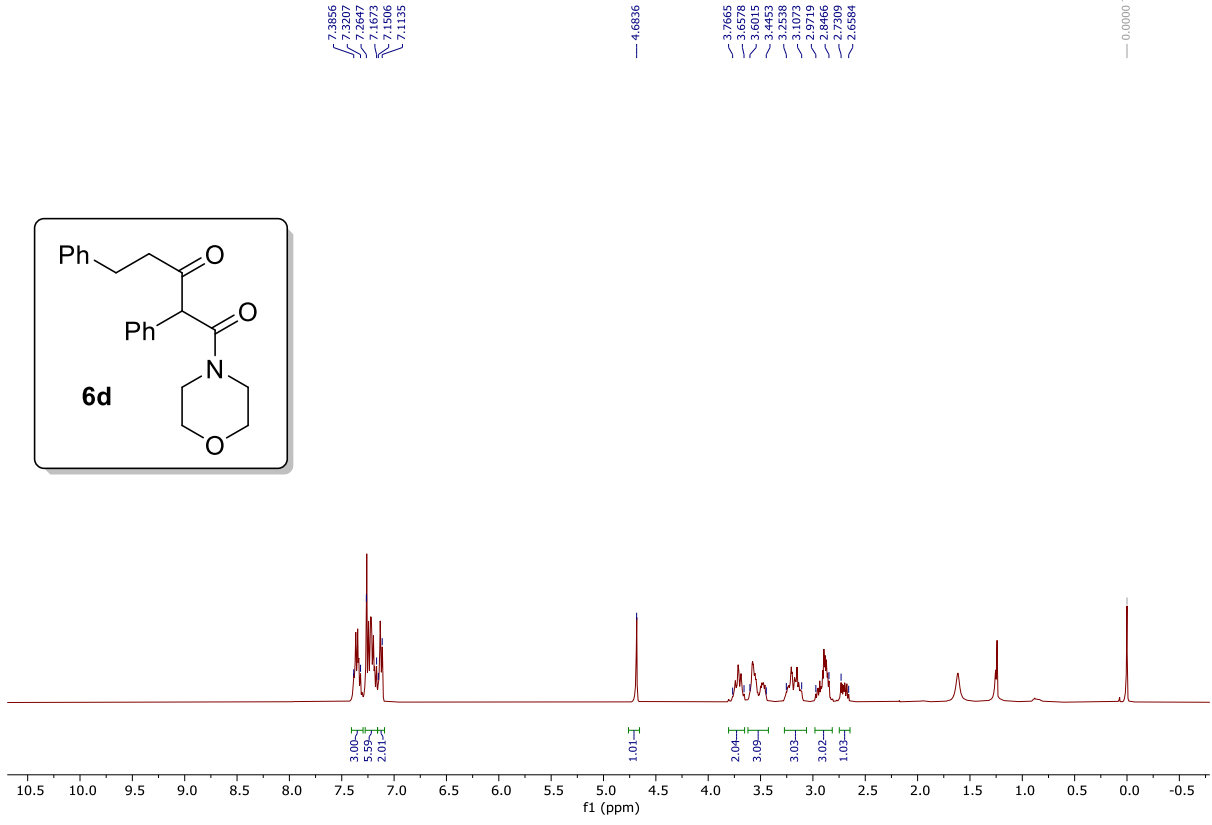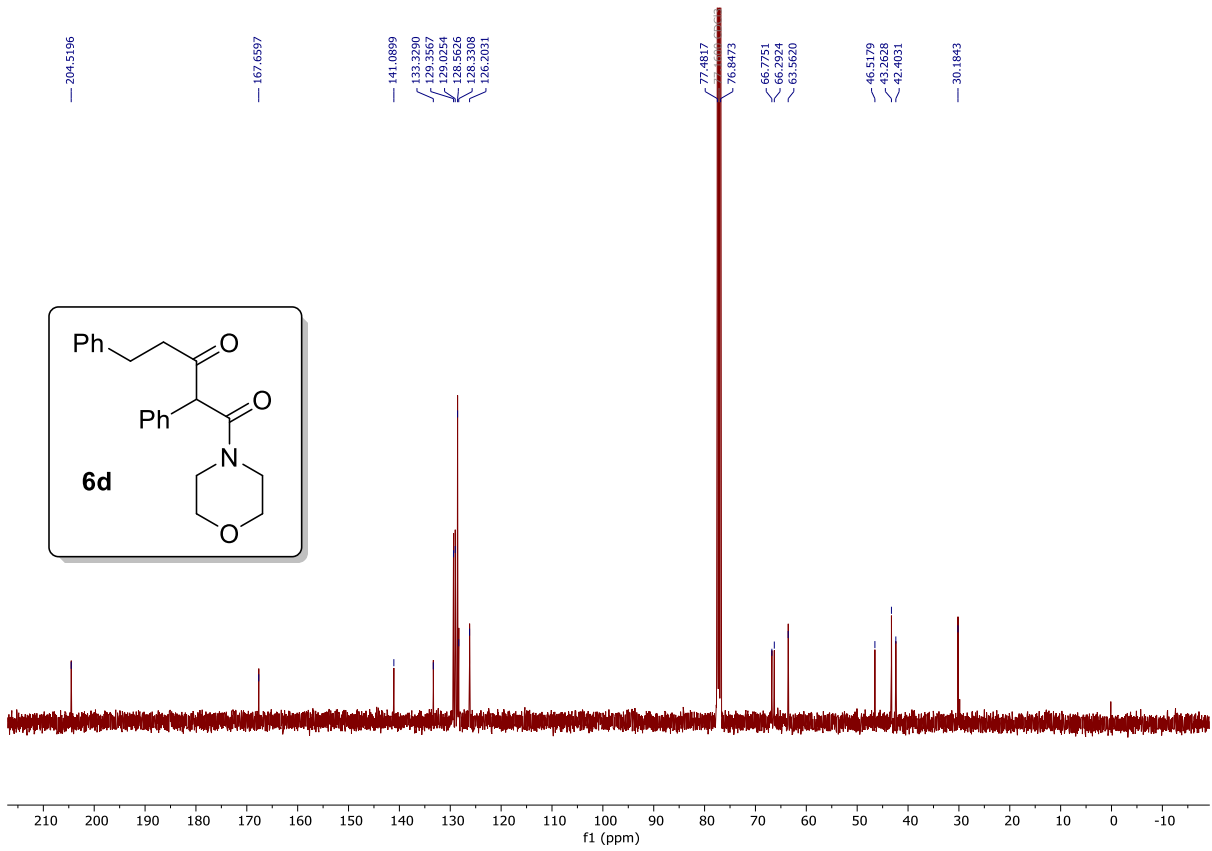

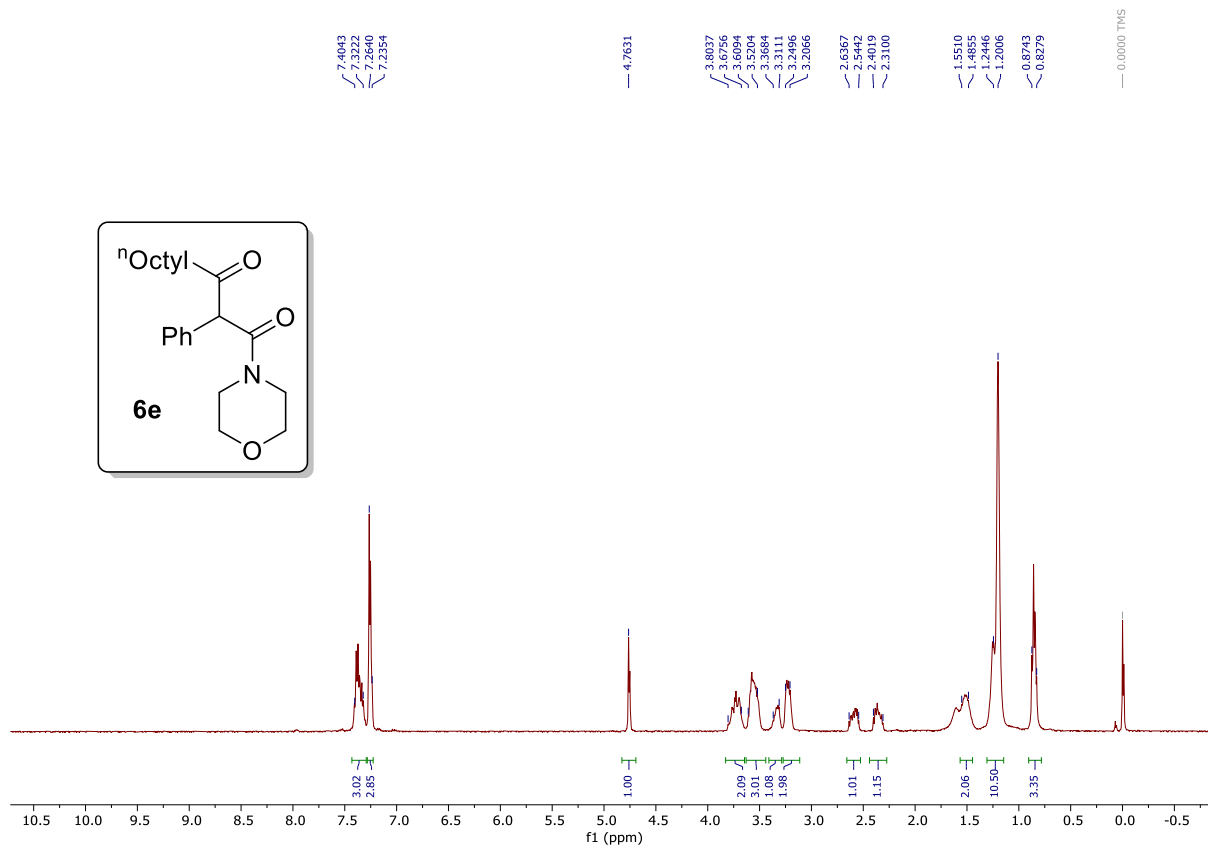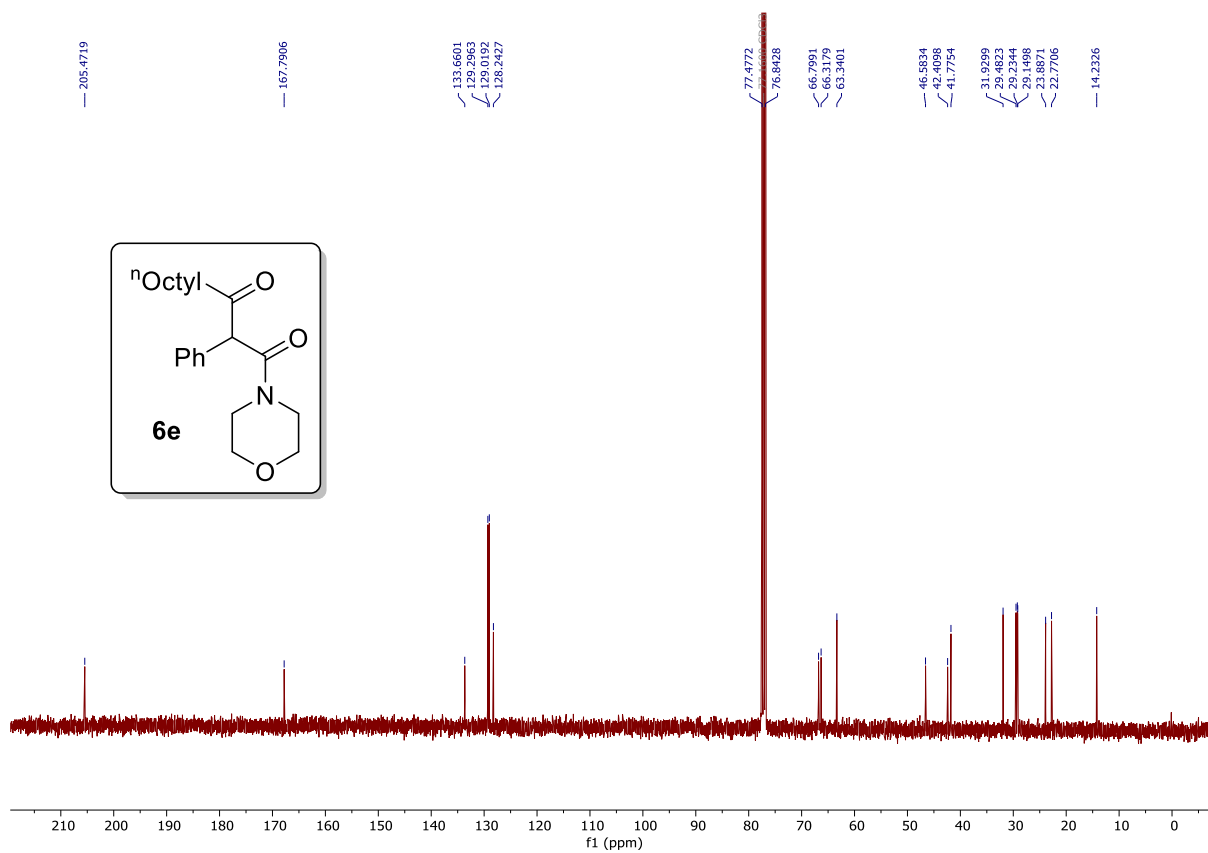

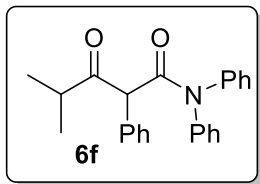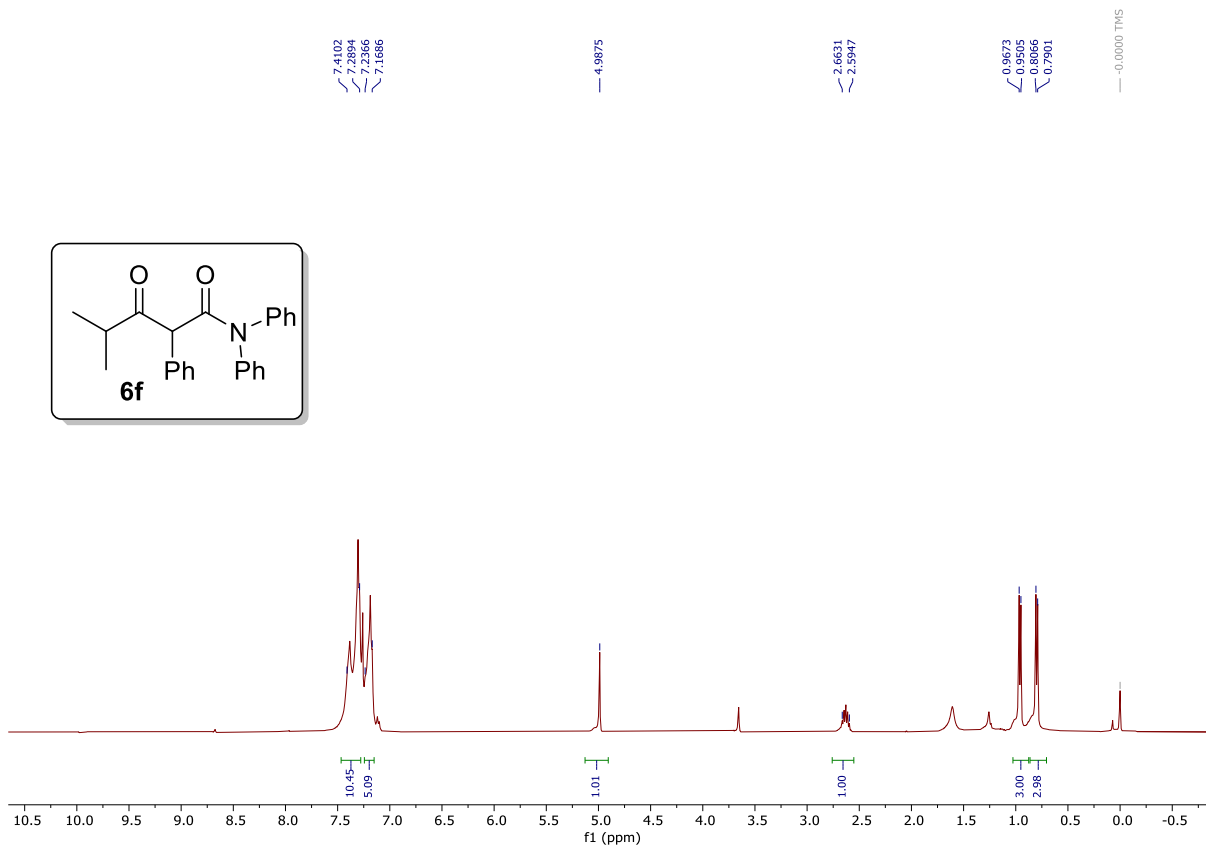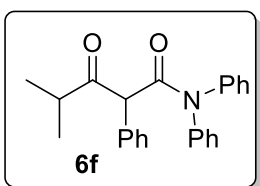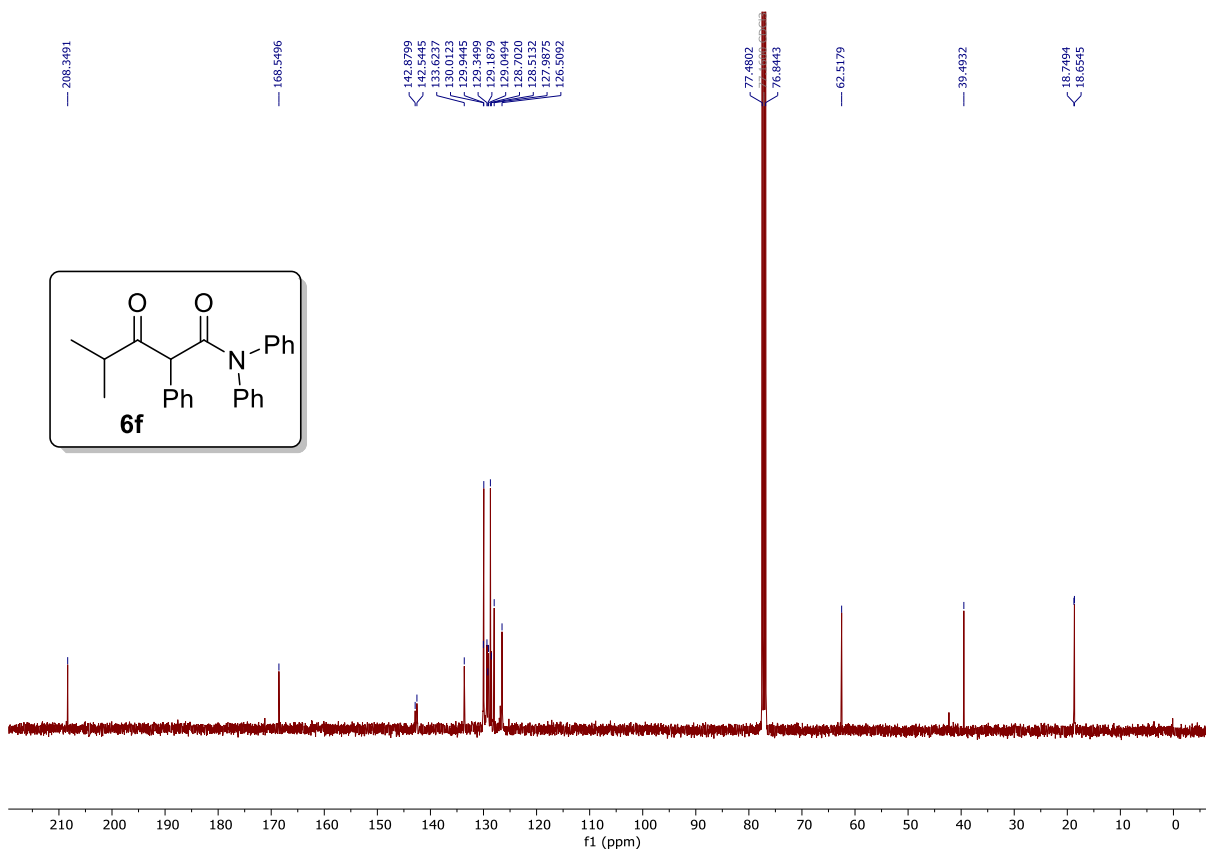

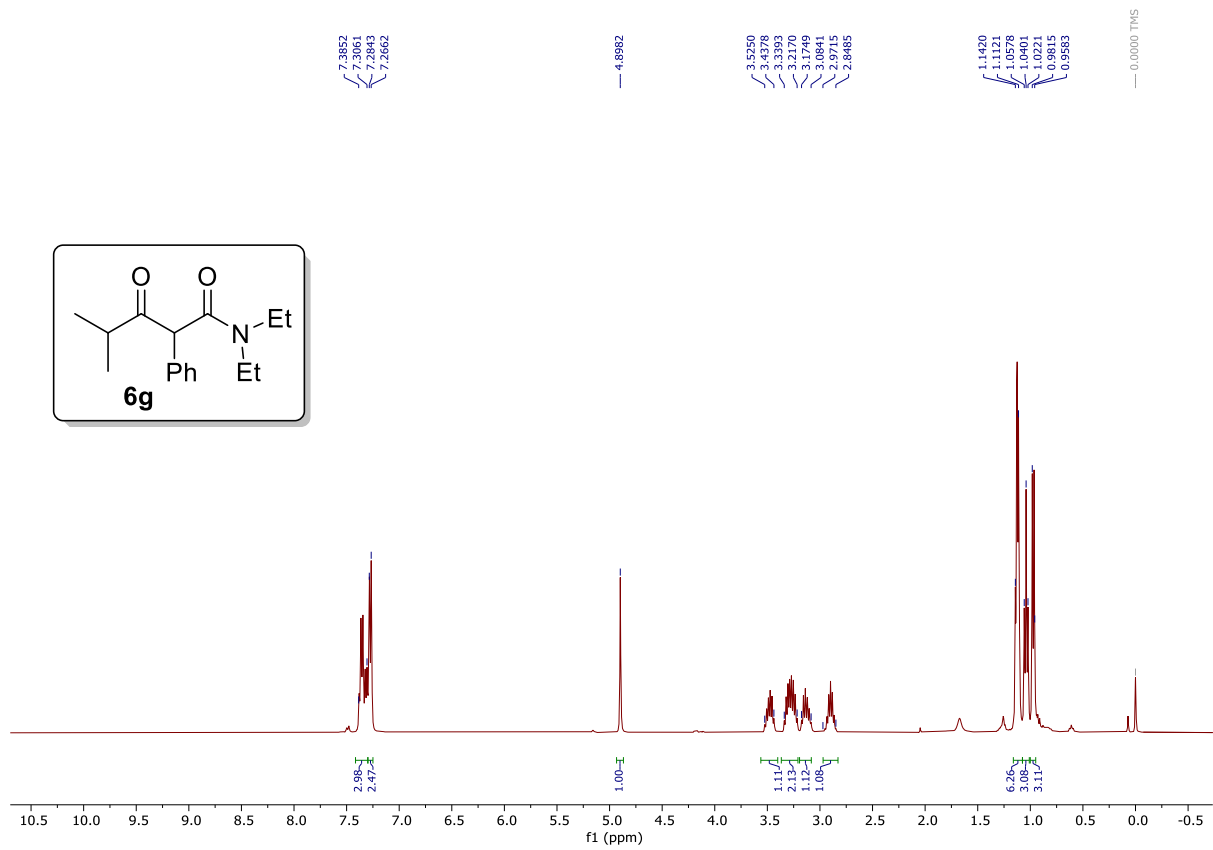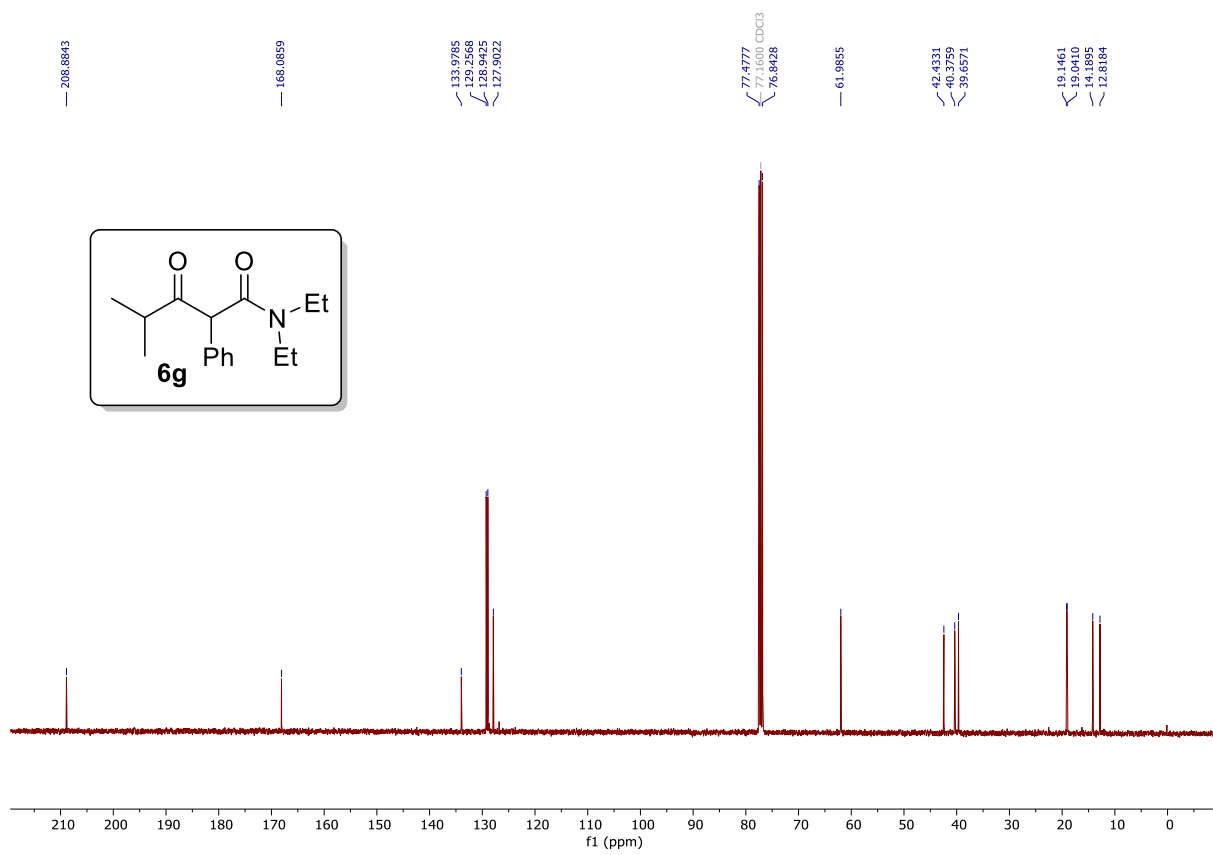

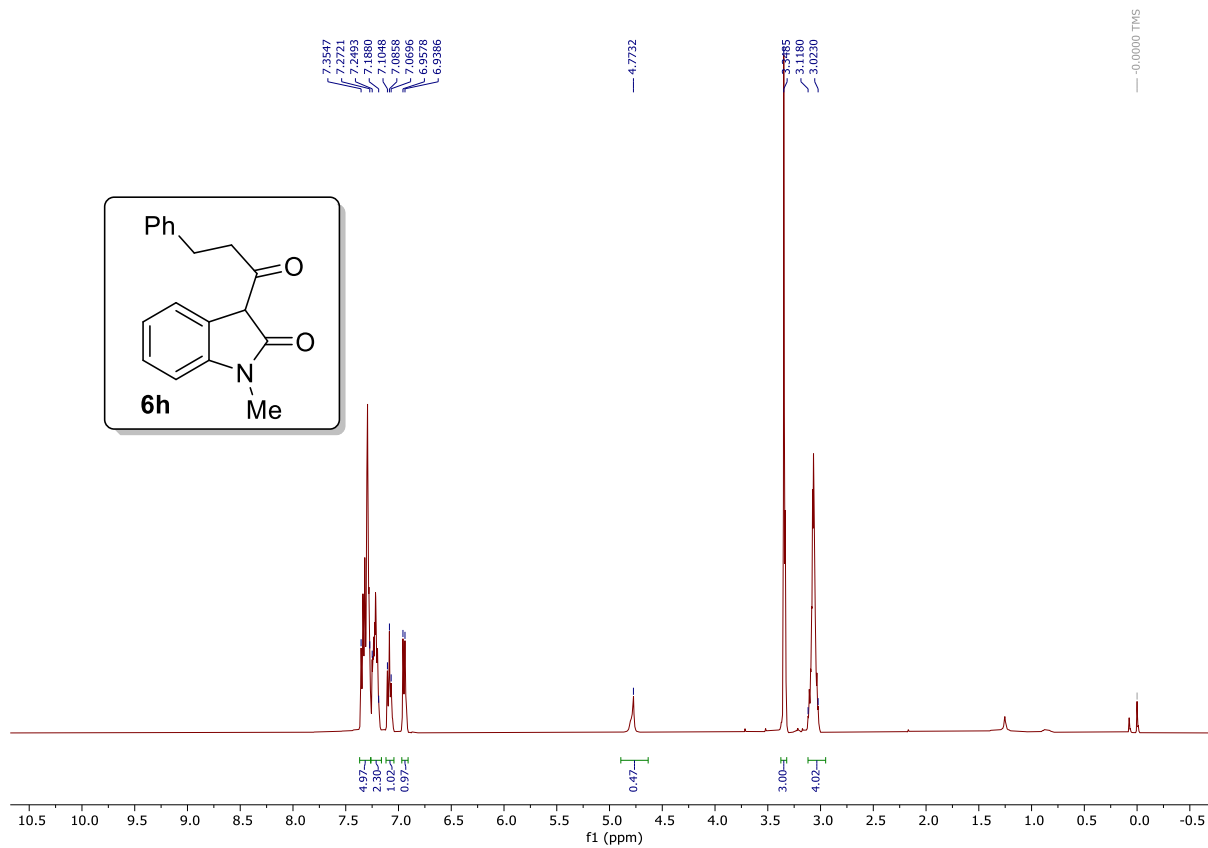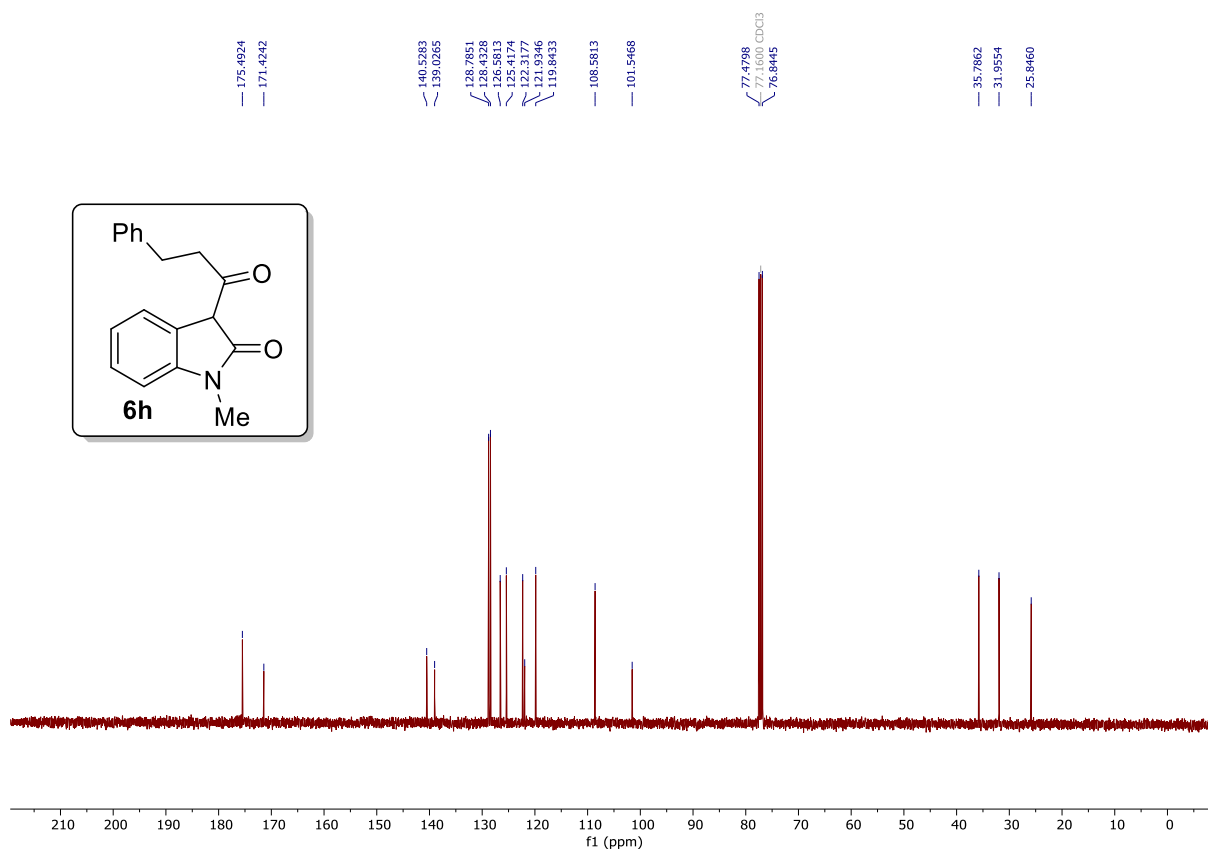

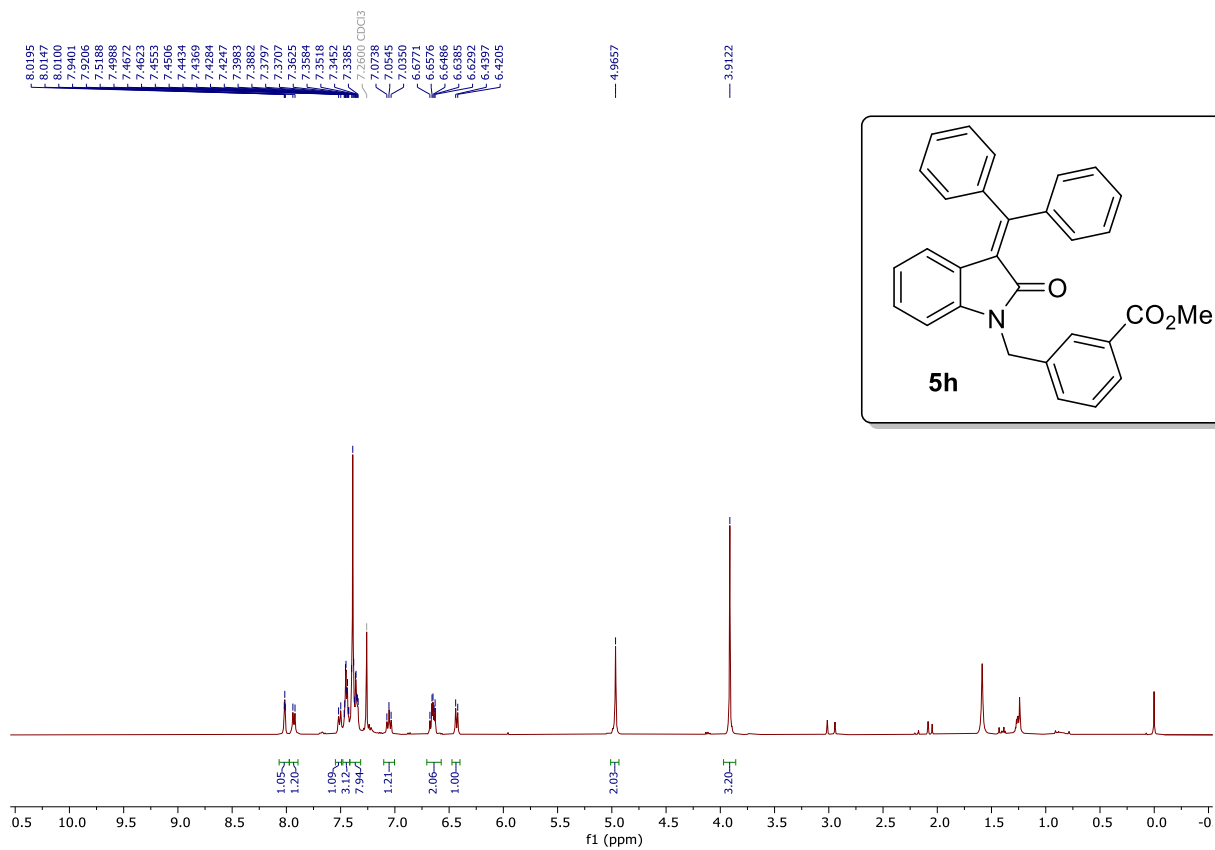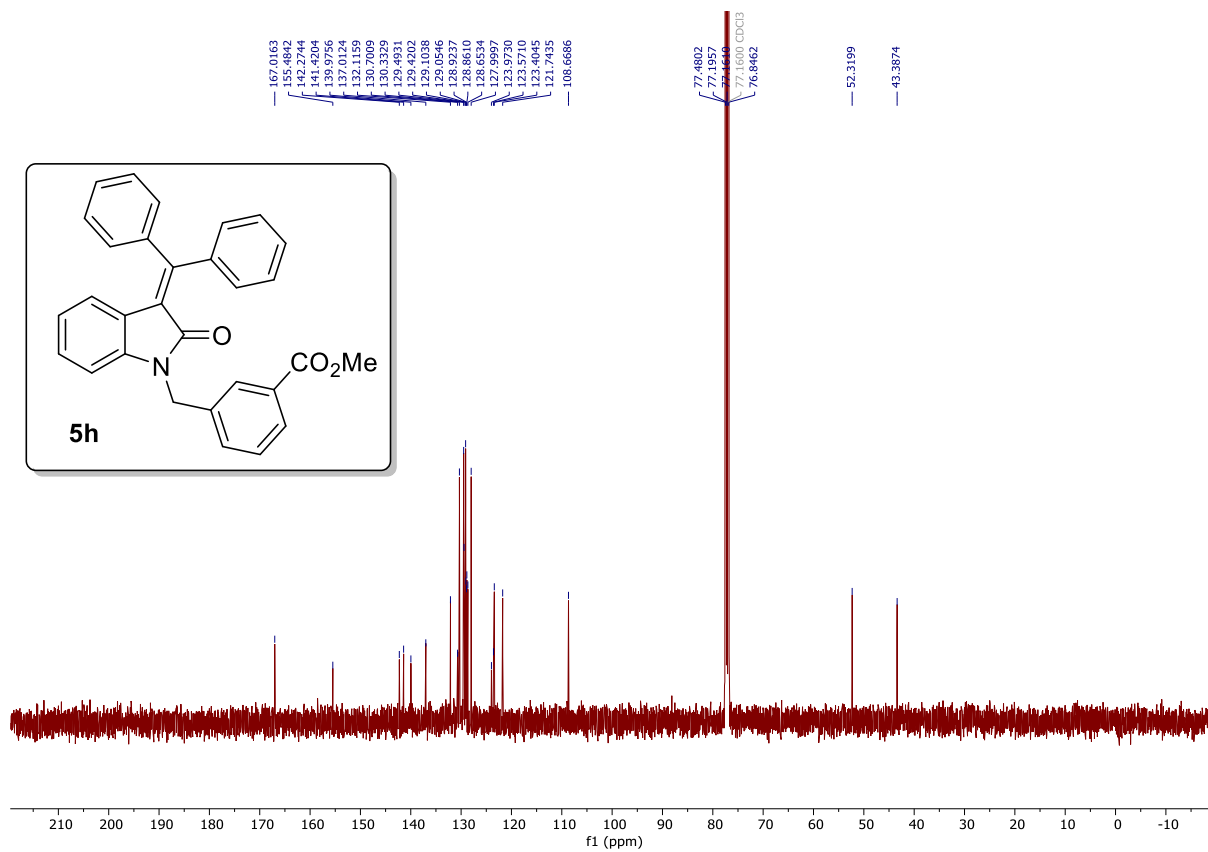



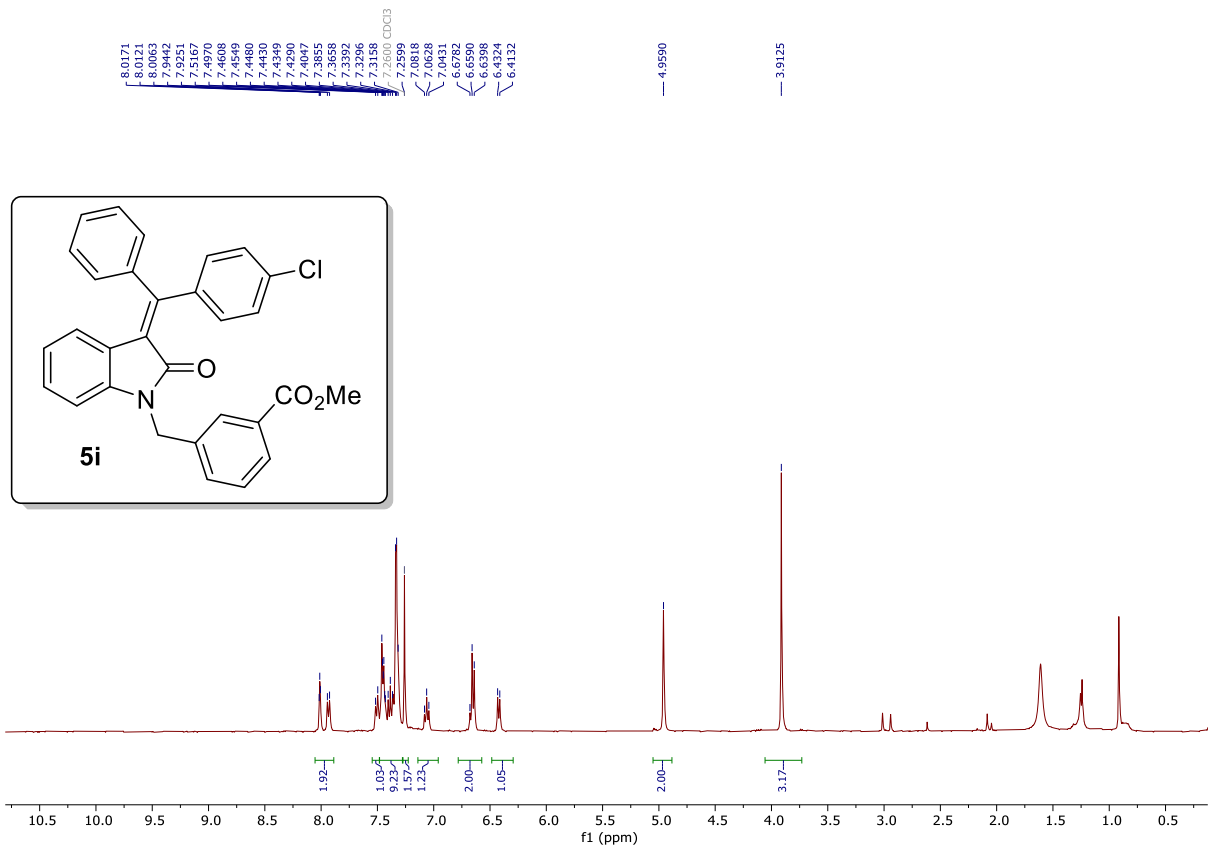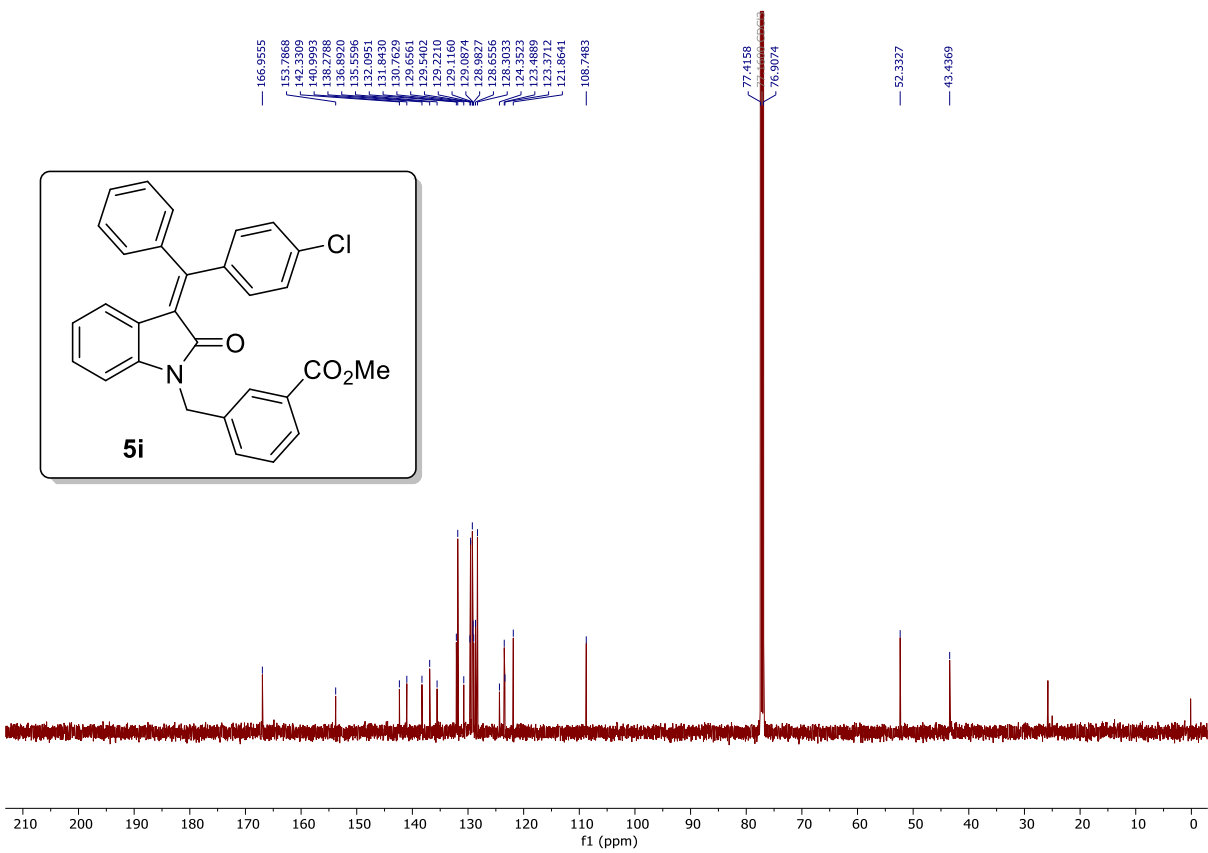

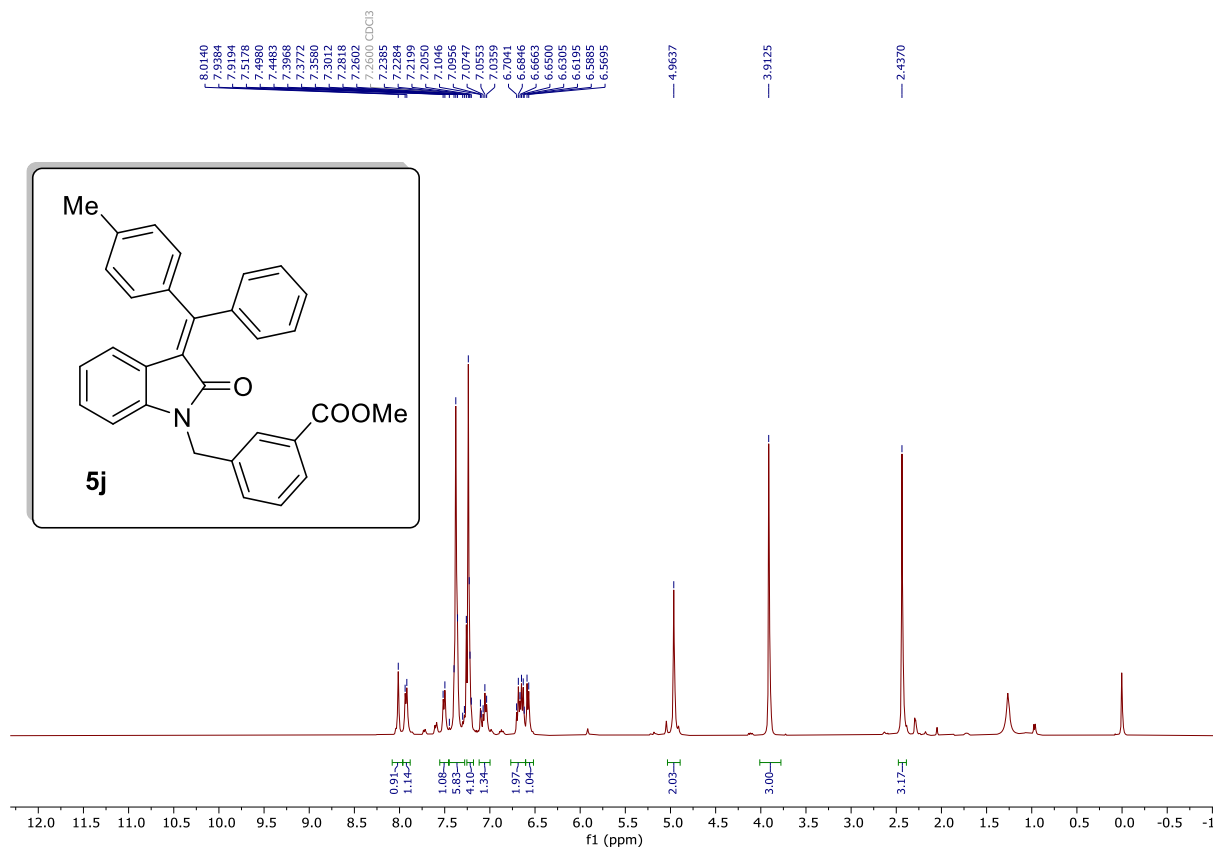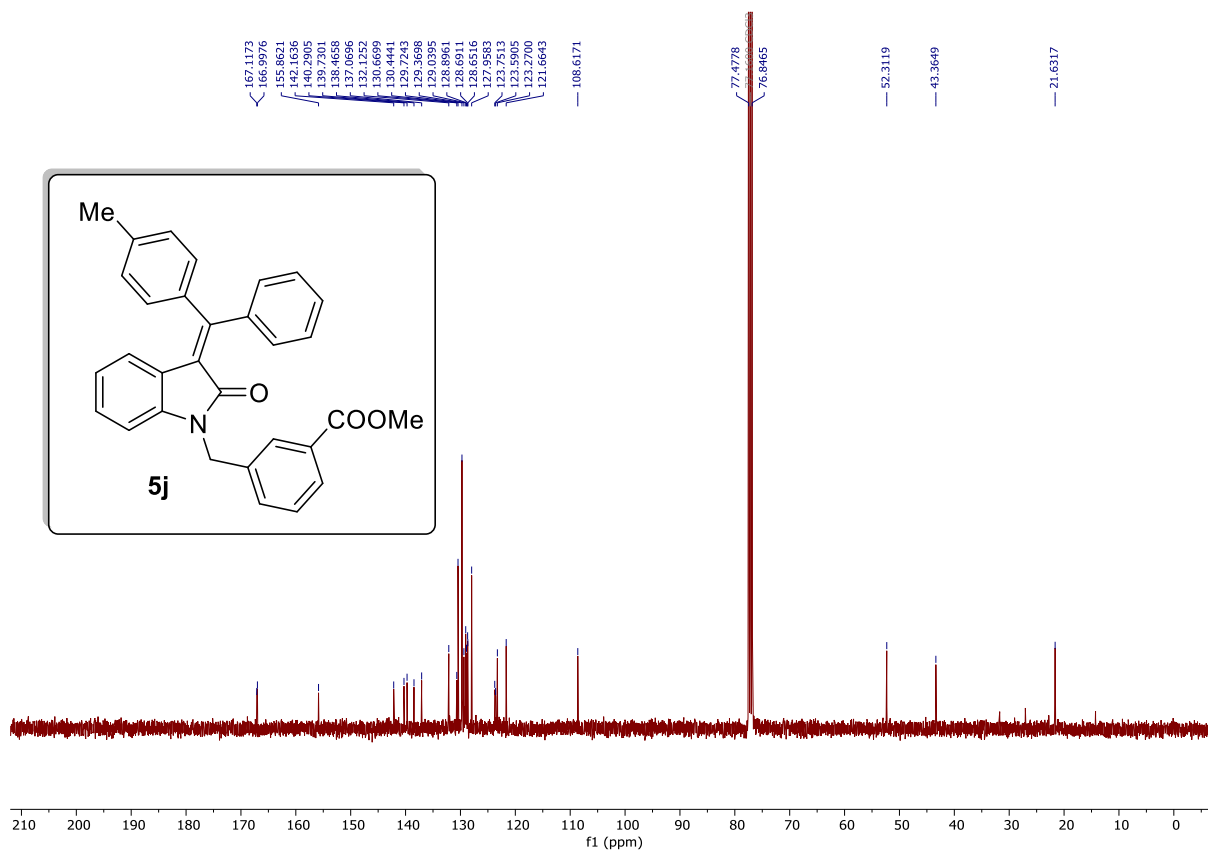

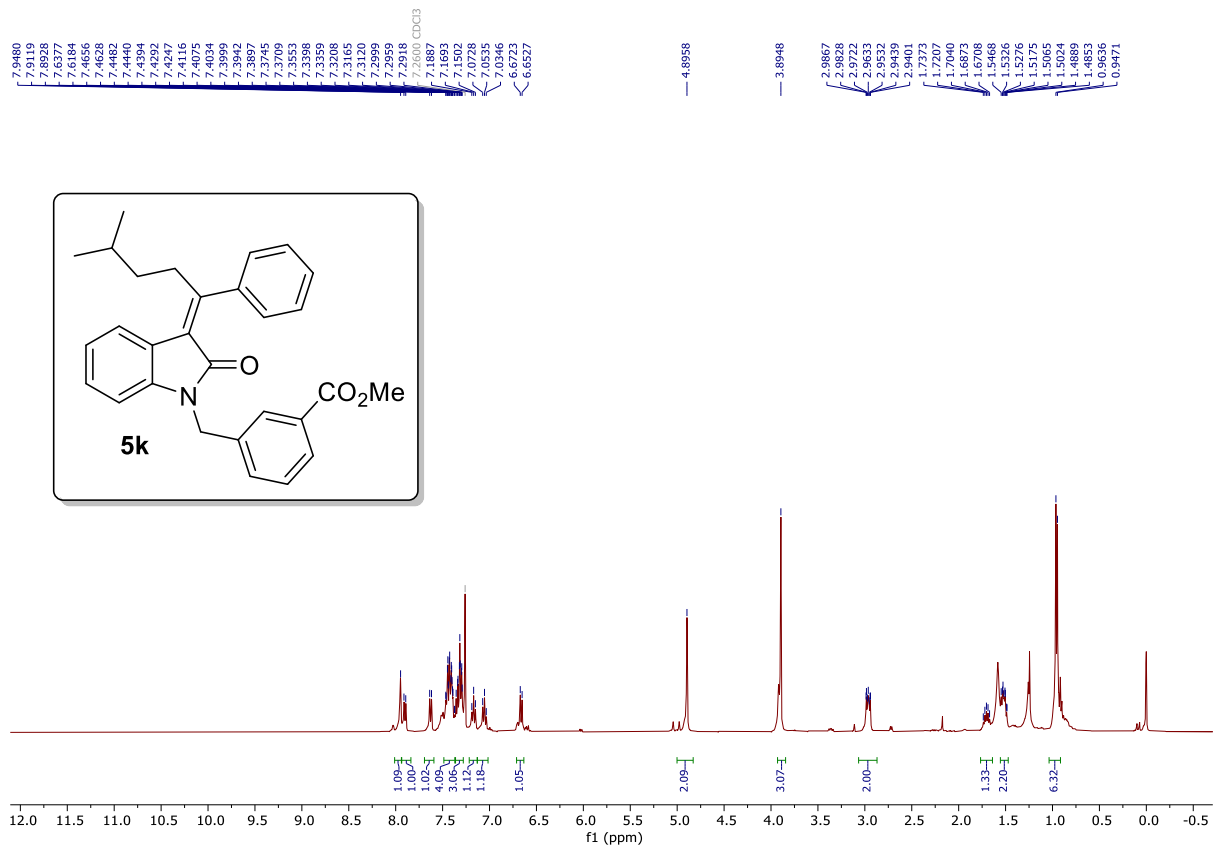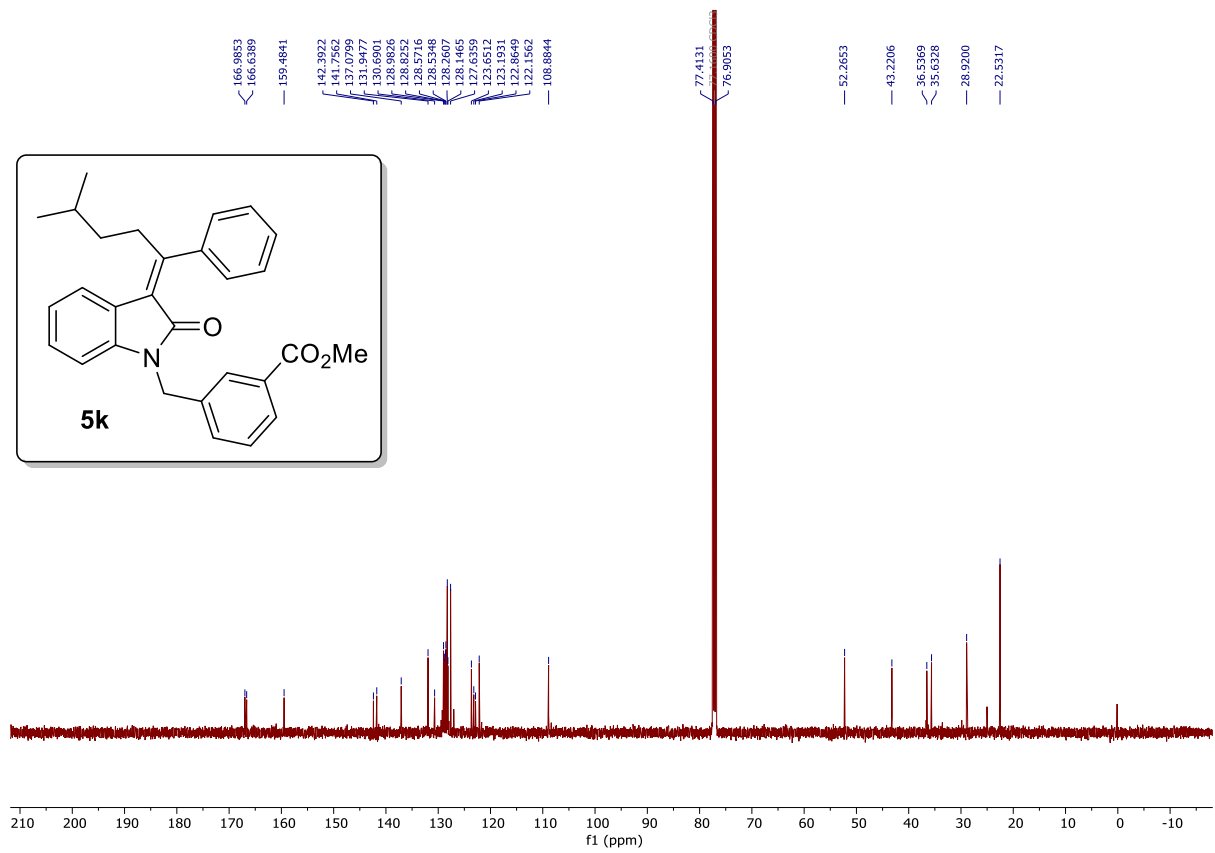

## 5. References:

1. a) H. Li, X. Shangguan, Z. Zhang, S. Huang, Y. Zhang, and J. Wang, *Org. Lett.* **2014**, 16, 448-451. b) K. Hong, X. Liu, and J. P. Morken, *J. Am. Chem. Soc.* **2014**, 136, 10581-10584. c) E. K. Edelstein, A. C. Grote, M. D. Palkowitz, and J. P. Morken, *Synlett*, **2018**, 29, 1749-1752. d) Y. Zhou, T. Xiong, L.-Y Zhou; H.-Y. Li, Y. C. Xiao, and F.-Er. Chen, *Org. Lett.*, **2022**, 24, 791-796.
2. a) C. Feng, and T.-P. Loh, *Angew. Chem. Int. Ed.* **2013**, 52, 12414-12417. b) A. Muthukumar, G. N. Rao, and G. Sekar, *Org. Biomol. Chem.*, **2019**, 17, 3921-3933.
3. H. Qu, Y. Chen, X. Ceng, P. Tang, H. Wang, F. Chen, *Asian J. Org. Chem.*, 2022, 11, e202200188.
4. R. Shintani, T. Yamagami, T. Hayashi, *Org. Lett.*, **2006**, 8, 4799-4801.
5. S. Park, J. Lee, K. J. Shin, E. Oh, J. H. Seo, *Molecules*, **2017**, 22, 503.



---

The following ALERTS were generated. Each ALERT has the format

**test-name\_ALERT\_alert-type\_alert-level.**

Click on the hyperlinks for more details of the test.

---

● **Alert level C**

|                   |               |                       |                                 |         |        |
|-------------------|---------------|-----------------------|---------------------------------|---------|--------|
| PLAT220_ALERT_2_C | NonSolvent    | Resd 1 C              | Ueq(max)/Ueq(min) Range         | 3.2     | Ratio  |
| PLAT242_ALERT_2_C | Low           | 'MainMol'             | Ueq as Compared to Neighbors of | C12     | Check  |
| PLAT242_ALERT_2_C | Low           | 'MainMol'             | Ueq as Compared to Neighbors of | C15     | Check  |
| PLAT242_ALERT_2_C | Low           | 'MainMol'             | Ueq as Compared to Neighbors of | C18     | Check  |
| PLAT340_ALERT_3_C | Low           | Bond Precision on     | C-C Bonds .....                 | 0.00453 | Ang.   |
| PLAT601_ALERT_2_C | Unit Cell     | Contains Solvent      | Accessible VOIDS of .           | 32      | Ang**3 |
| PLAT906_ALERT_3_C | Large K Value | in the Analysis of    | Variance .....                  | 10.548  | Check  |
| PLAT906_ALERT_3_C | Large K Value | in the Analysis of    | Variance .....                  | 2.479   | Check  |
| PLAT934_ALERT_3_C | Number of     | (Iobs-Icalc)/Sigma(W) | > 10 Outliers ..                | 1       | Check  |

---

● **Alert level G**

|                   |                 |                      |                                 |      |       |             |
|-------------------|-----------------|----------------------|---------------------------------|------|-------|-------------|
| PLAT395_ALERT_2_G | Deviating       | X-O-Y                | Angle From 120 for O3           | .    | 107.6 | Degree      |
| PLAT395_ALERT_2_G | Deviating       | X-O-Y                | Angle From 120 for O4           | .    | 107.4 | Degree      |
| PLAT883_ALERT_1_G | No Info/Value   | for                  | _atom_sites_solution_primary    | .    |       | Please Do ! |
| PLAT910_ALERT_3_G | Missing #       | of FCF Reflection(s) | Below Theta(Min).               |      | 1     | Note        |
| PLAT933_ALERT_2_G | Number of       | HKL-OMIT Records     | in Embedded .res File           |      | 1     | Note        |
| PLAT967_ALERT_5_G | Note: Two-Theta | Cutoff Value         | in Embedded .res ..             | 51.0 |       | Degree      |
| PLAT978_ALERT_2_G | Number          | C-C Bonds            | with Positive Residual Density. |      | 3     | Info        |

---

- 0 **ALERT level A** = Most likely a serious problem - resolve or explain  
0 **ALERT level B** = A potentially serious problem, consider carefully  
9 **ALERT level C** = Check. Ensure it is not caused by an omission or oversight  
7 **ALERT level G** = General information/check it is not something unexpected

- 1 ALERT type 1 CIF construction/syntax error, inconsistent or missing data  
9 ALERT type 2 Indicator that the structure model may be wrong or deficient  
5 ALERT type 3 Indicator that the structure quality may be low  
0 ALERT type 4 Improvement, methodology, query or suggestion  
1 ALERT type 5 Informative message, check
- 
-

It is advisable to attempt to resolve as many as possible of the alerts in all categories. Often the minor alerts point to easily fixed oversights, errors and omissions in your CIF or refinement strategy, so attention to these fine details can be worthwhile. In order to resolve some of the more serious problems it may be necessary to carry out additional measurements or structure refinements. However, the purpose of your study may justify the reported deviations and the more serious of these should normally be commented upon in the discussion or experimental section of a paper or in the "special\_details" fields of the CIF. checkCIF was carefully designed to identify outliers and unusual parameters, but every test has its limitations and alerts that are not important in a particular case may appear. Conversely, the absence of alerts does not guarantee there are no aspects of the results needing attention. It is up to the individual to critically assess their own results and, if necessary, seek expert advice.

### **Publication of your CIF in IUCr journals**

A basic structural check has been run on your CIF. These basic checks will be run on all CIFs submitted for publication in IUCr journals (*Acta Crystallographica*, *Journal of Applied Crystallography*, *Journal of Synchrotron Radiation*); however, if you intend to submit to *Acta Crystallographica Section C* or *E* or *IUCrData*, you should make sure that **full publication checks** are run on the final version of your CIF prior to submission.

### **Publication of your CIF in other journals**

Please refer to the *Notes for Authors* of the relevant journal for any special instructions relating to CIF submission.

---

**PLATON version of 28/11/2022; check.def file version of 28/11/2022**

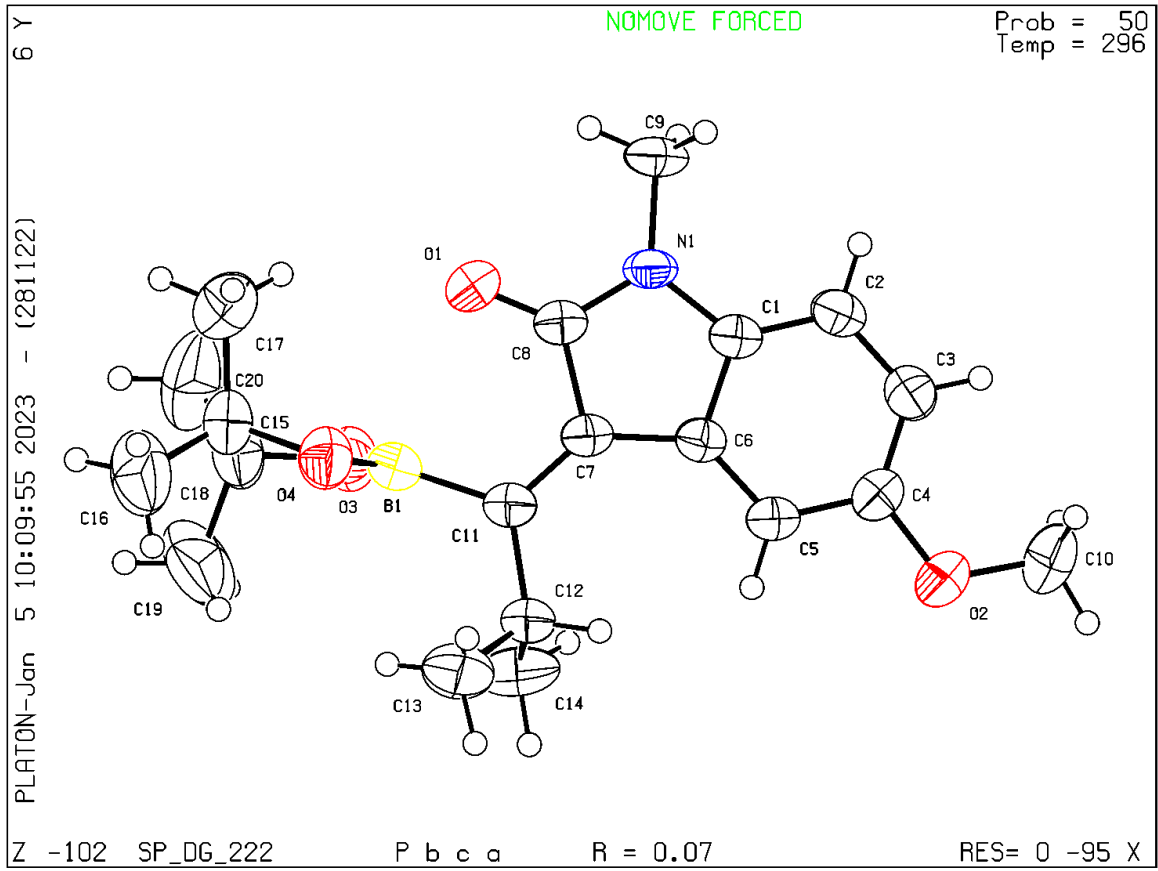





---

The following ALERTS were generated. Each ALERT has the format

**test-name\_ALERT\_alert-type\_alert-level.**

Click on the hyperlinks for more details of the test.

---

● **Alert level C**

RINTA01\_ALERT\_3\_C The value of Rint is greater than 0.12  
Rint given 0.131  
PLAT340\_ALERT\_3\_C Low Bond Precision on C-C Bonds ..... 0.00485 Ang.  
PLAT411\_ALERT\_2\_C Short Inter H...H Contact H9B ..H9B . 2.14 Ang.  
1-x,1-y,1-z = 2\_666 Check  
PLAT905\_ALERT\_3\_C Negative K value in the Analysis of Variance ... -0.679 Report

---

● **Alert level G**

PLAT020\_ALERT\_3\_G The Value of Rint is Greater Than 0.12 ..... 0.131 Report  
PLAT395\_ALERT\_2\_G Deviating X-O-Y Angle From 120 for O1 . 108.5 Degree  
PLAT395\_ALERT\_2\_G Deviating X-O-Y Angle From 120 for O2 . 107.4 Degree  
PLAT395\_ALERT\_2\_G Deviating X-O-Y Angle From 120 for O3 . 109.1 Degree  
PLAT883\_ALERT\_1\_G No Info/Value for \_atom\_sites\_solution\_primary . Please Do !  
PLAT910\_ALERT\_3\_G Missing # of FCF Reflection(s) Below Theta(Min). 3 Note  
PLAT941\_ALERT\_3\_G Average HKL Measurement Multiplicity ..... 4.0 Low  
PLAT967\_ALERT\_5\_G Note: Two-Theta Cutoff Value in Embedded .res .. 50.0 Degree  
PLAT978\_ALERT\_2\_G Number C-C Bonds with Positive Residual Density. 1 Info

---

- 0 **ALERT level A** = Most likely a serious problem - resolve or explain  
0 **ALERT level B** = A potentially serious problem, consider carefully  
4 **ALERT level C** = Check. Ensure it is not caused by an omission or oversight  
9 **ALERT level G** = General information/check it is not something unexpected

- 1 ALERT type 1 CIF construction/syntax error, inconsistent or missing data  
5 ALERT type 2 Indicator that the structure model may be wrong or deficient  
6 ALERT type 3 Indicator that the structure quality may be low  
0 ALERT type 4 Improvement, methodology, query or suggestion  
1 ALERT type 5 Informative message, check
- 
-

It is advisable to attempt to resolve as many as possible of the alerts in all categories. Often the minor alerts point to easily fixed oversights, errors and omissions in your CIF or refinement strategy, so attention to these fine details can be worthwhile. In order to resolve some of the more serious problems it may be necessary to carry out additional measurements or structure refinements. However, the purpose of your study may justify the reported deviations and the more serious of these should normally be commented upon in the discussion or experimental section of a paper or in the "special\_details" fields of the CIF. checkCIF was carefully designed to identify outliers and unusual parameters, but every test has its limitations and alerts that are not important in a particular case may appear. Conversely, the absence of alerts does not guarantee there are no aspects of the results needing attention. It is up to the individual to critically assess their own results and, if necessary, seek expert advice.

### **Publication of your CIF in IUCr journals**

A basic structural check has been run on your CIF. These basic checks will be run on all CIFs submitted for publication in IUCr journals (*Acta Crystallographica*, *Journal of Applied Crystallography*, *Journal of Synchrotron Radiation*); however, if you intend to submit to *Acta Crystallographica Section C* or *E* or *IUCrData*, you should make sure that full publication checks are run on the final version of your CIF prior to submission.

### **Publication of your CIF in other journals**

Please refer to the *Notes for Authors* of the relevant journal for any special instructions relating to CIF submission.

---

**PLATON version of 28/11/2022; check.def file version of 28/11/2022**

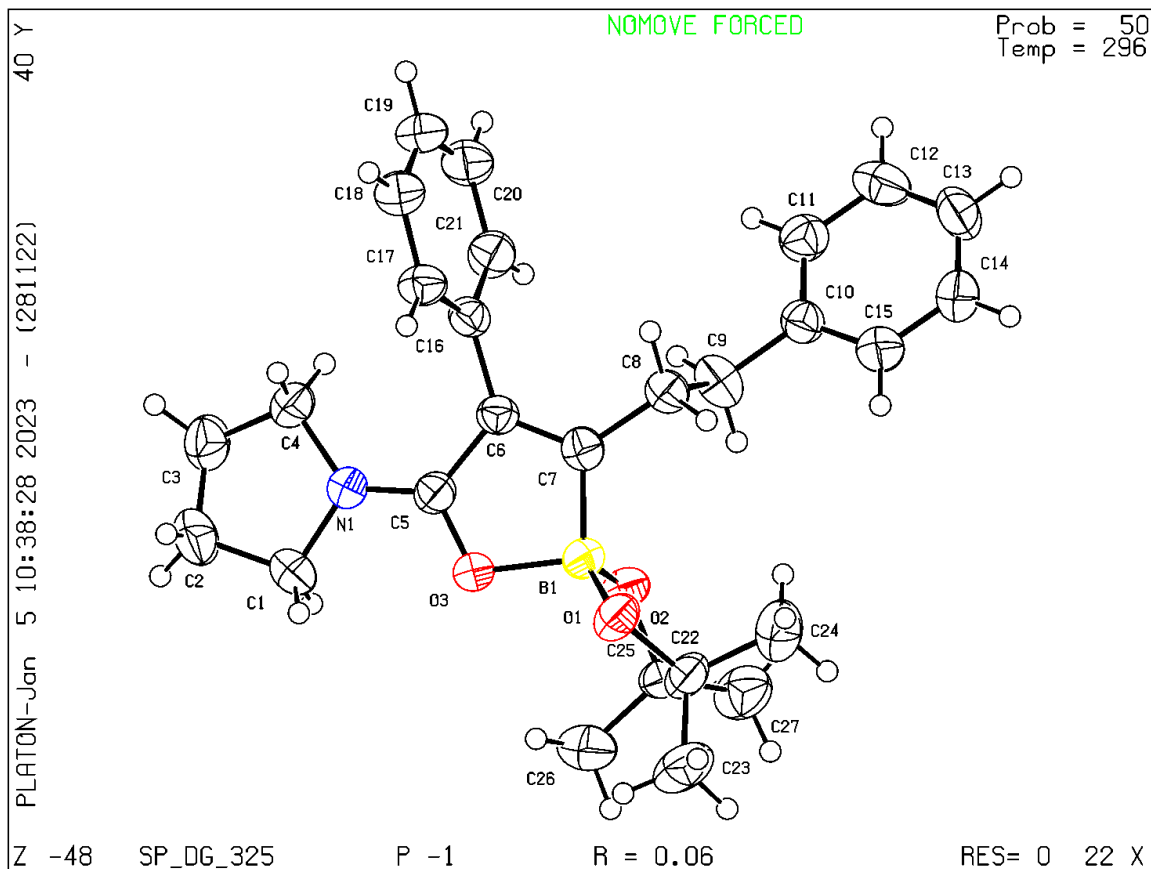



---

The following ALERTS were generated. Each ALERT has the format

**test-name\_ALERT\_alert-type\_alert-level.**

Click on the hyperlinks for more details of the test.

---

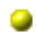

**Alert level C**

PLAT905\_ALERT\_3\_C Negative K value in the Analysis of Variance ... -1.088 Report

---

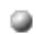

**Alert level G**

PLAT883\_ALERT\_1\_G No Info/Value for \_atom\_sites\_solution\_primary . Please Do !  
PLAT967\_ALERT\_5\_G Note: Two-Theta Cutoff Value in Embedded .res .. 51.0 Degree  
PLAT978\_ALERT\_2\_G Number C-C Bonds with Positive Residual Density. 2 Info

---

- 0 **ALERT level A** = Most likely a serious problem - resolve or explain
- 0 **ALERT level B** = A potentially serious problem, consider carefully
- 1 **ALERT level C** = Check. Ensure it is not caused by an omission or oversight
- 3 **ALERT level G** = General information/check it is not something unexpected

- 1 ALERT type 1 CIF construction/syntax error, inconsistent or missing data
  - 1 ALERT type 2 Indicator that the structure model may be wrong or deficient
  - 1 ALERT type 3 Indicator that the structure quality may be low
  - 0 ALERT type 4 Improvement, methodology, query or suggestion
  - 1 ALERT type 5 Informative message, check
- 
-

It is advisable to attempt to resolve as many as possible of the alerts in all categories. Often the minor alerts point to easily fixed oversights, errors and omissions in your CIF or refinement strategy, so attention to these fine details can be worthwhile. In order to resolve some of the more serious problems it may be necessary to carry out additional measurements or structure refinements. However, the purpose of your study may justify the reported deviations and the more serious of these should normally be commented upon in the discussion or experimental section of a paper or in the "special\_details" fields of the CIF. checkCIF was carefully designed to identify outliers and unusual parameters, but every test has its limitations and alerts that are not important in a particular case may appear. Conversely, the absence of alerts does not guarantee there are no aspects of the results needing attention. It is up to the individual to critically assess their own results and, if necessary, seek expert advice.

### **Publication of your CIF in IUCr journals**

A basic structural check has been run on your CIF. These basic checks will be run on all CIFs submitted for publication in IUCr journals (*Acta Crystallographica*, *Journal of Applied Crystallography*, *Journal of Synchrotron Radiation*); however, if you intend to submit to *Acta Crystallographica Section C* or *E* or *IUCrData*, you should make sure that **full publication checks** are run on the final version of your CIF prior to submission.

### **Publication of your CIF in other journals**

Please refer to the *Notes for Authors* of the relevant journal for any special instructions relating to CIF submission.

---

**PLATON version of 12/09/2022; check.def file version of 09/08/2022**

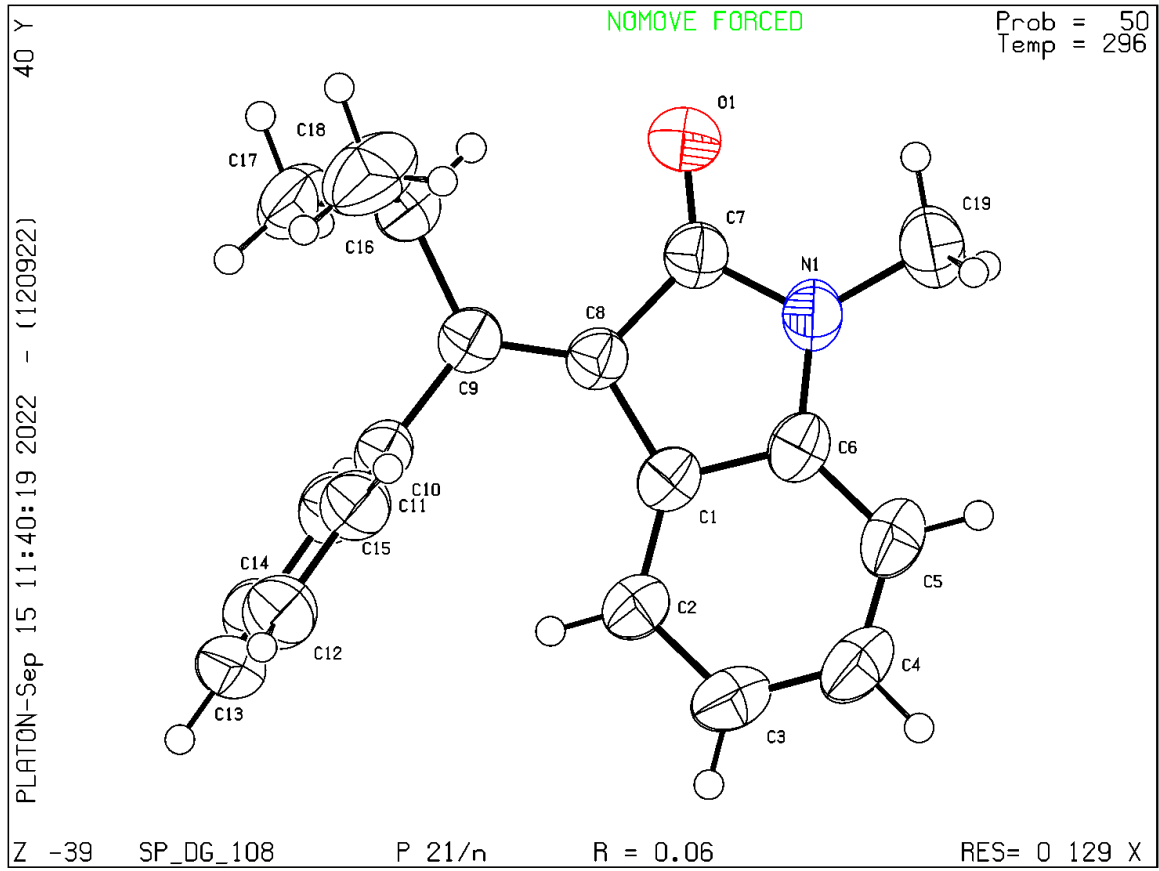





---

The following ALERTS were generated. Each ALERT has the format

**test-name\_ALERT\_alert-type\_alert-level.**

Click on the hyperlinks for more details of the test.

---

 **Alert level B**

PLAT410\_ALERT\_2\_B Short Intra H...H Contact H00A ..H00I . 1.89 Ang.  
x,y,z = 1\_555 Check

---

 **Alert level C**

ABSTY02\_ALERT\_1\_C An \_exptl\_absorpt\_correction\_type has been given without  
a literature citation. This should be contained in the  
\_exptl\_absorpt\_process\_details field.

Absorption correction given as multi-scan

PLAT148\_ALERT\_3\_C s.u. on the a - Axis is (Too) Large .... 0.012 Ang.  
PLAT148\_ALERT\_3\_C s.u. on the b - Axis is (Too) Large .... 0.0110 Ang.  
PLAT148\_ALERT\_3\_C s.u. on the c - Axis is (Too) Large .... 0.020 Ang.  
PLAT220\_ALERT\_2\_C NonSolvent Resd 1 C Ueq(max)/Ueq(min) Range 3.6 Ratio  
PLAT230\_ALERT\_2\_C Hirshfeld Test Diff for C00G --C00K . 5.5 s.u.  
PLAT242\_ALERT\_2\_C Low 'MainMol' Ueq as Compared to Neighbors of C00G Check  
PLAT767\_ALERT\_4\_C INS Embedded LIST 6 Instruction Should be LIST 4 Please Check  
PLAT906\_ALERT\_3\_C Large K Value in the Analysis of Variance ..... 5.078 Check  
PLAT911\_ALERT\_3\_C Missing FCF Refl Between Thmin & STh/L= 0.600 3 Report  
PLAT934\_ALERT\_3\_C Number of (Iobs-Icalc)/Sigma(W) > 10 Outliers .. 1 Check

---

 **Alert level G**

PLAT066\_ALERT\_1\_G Predicted and Reported Tmin&Tmax Range Identical ? Check  
PLAT720\_ALERT\_4\_G Number of Unusual/Non-Standard Labels ..... 40 Note  
PLAT883\_ALERT\_1\_G No Info/Value for \_atom\_sites\_solution\_primary . Please Do !  
PLAT910\_ALERT\_3\_G Missing # of FCF Reflection(s) Below Theta(Min). 1 Note  
PLAT912\_ALERT\_4\_G Missing # of FCF Reflections Above STh/L= 0.600 6 Note  
PLAT913\_ALERT\_3\_G Missing # of Very Strong Reflections in FCF .... 1 Note  
PLAT965\_ALERT\_2\_G The SHELXL WEIGHT Optimisation has not Converged Please Check  
PLAT978\_ALERT\_2\_G Number C-C Bonds with Positive Residual Density. 2 Info

---

- 0 **ALERT level A** = Most likely a serious problem - resolve or explain  
1 **ALERT level B** = A potentially serious problem, consider carefully  
11 **ALERT level C** = Check. Ensure it is not caused by an omission or oversight  
8 **ALERT level G** = General information/check it is not something unexpected
- 3 ALERT type 1 CIF construction/syntax error, inconsistent or missing data  
6 ALERT type 2 Indicator that the structure model may be wrong or deficient  
8 ALERT type 3 Indicator that the structure quality may be low  
3 ALERT type 4 Improvement, methodology, query or suggestion  
0 ALERT type 5 Informative message, check
- 

## Validation response form

Please find below a validation response form (VRF) that can be filled in and pasted into your CIF.

```
# start Validation Reply Form
_vrf_ABSTY02_shelx
;
PROBLEM: An _exptl_absorpt_correction_type has been given without
RESPONSE: ...
;
_vrf_PLAT410_shelx
;
PROBLEM: Short Intra H...H Contact H00A ..H00I . 1.89 Ang.
RESPONSE: ...
;
_vrf_PLAT148_shelx
;
PROBLEM: s.u. on the a - Axis is (Too) Large .... 0.012 Ang.
RESPONSE: ...
;
_vrf_PLAT220_shelx
;
PROBLEM: NonSolvent Resd 1 C Ueq(max)/Ueq(min) Range 3.6 Ratio
RESPONSE: ...
;
_vrf_PLAT230_shelx
;
PROBLEM: Hirshfeld Test Diff for C00G --C00K . 5.5 s.u.
RESPONSE: ...
;
_vrf_PLAT242_shelx
;
PROBLEM: Low 'MainMol' Ueq as Compared to Neighbors of C00G Check
RESPONSE: ...
;
_vrf_PLAT767_shelx
;
PROBLEM: INS Embedded LIST 6 Instruction Should be LIST 4 Please Check
RESPONSE: ...
;
_vrf_PLAT906_shelx
;
PROBLEM: Large K Value in the Analysis of Variance ..... 5.078 Check
RESPONSE: ...
;
_vrf_PLAT911_shelx
;
PROBLEM: Missing FCF Refl Between Thmin & STh/L= 0.600 3 Report
RESPONSE: ...
;
_vrf_PLAT934_shelx
;
PROBLEM: Number of (Iobs-Icalc)/Sigma(W) > 10 Outliers .. 1 Check
RESPONSE: ...
;
# end Validation Reply Form
```

---

It is advisable to attempt to resolve as many as possible of the alerts in all categories. Often the minor alerts point to easily fixed oversights, errors and omissions in your CIF or refinement strategy, so attention to these fine details can be worthwhile. In order to resolve some of the more serious problems it may be necessary to carry out additional measurements or structure refinements. However, the purpose of your study may justify the reported deviations and the more serious of these should normally be commented upon in the discussion or experimental section of a paper or in the "special\_details" fields of the CIF. checkCIF was carefully designed to identify outliers and unusual parameters, but every test has its limitations and alerts that are not important in a particular case may appear. Conversely, the absence of alerts does not guarantee there are no aspects of the results needing attention. It is up to the individual to critically assess their own results and, if necessary, seek expert advice.

### **Publication of your CIF in IUCr journals**

A basic structural check has been run on your CIF. These basic checks will be run on all CIFs submitted for publication in IUCr journals (*Acta Crystallographica*, *Journal of Applied Crystallography*, *Journal of Synchrotron Radiation*); however, if you intend to submit to *Acta Crystallographica Section C* or *E* or *IUCrData*, you should make sure that **full publication checks** are run on the final version of your CIF prior to submission.

### **Publication of your CIF in other journals**

Please refer to the *Notes for Authors* of the relevant journal for any special instructions relating to CIF submission.

---

**PLATON version of 28/11/2022; check.def file version of 28/11/2022**

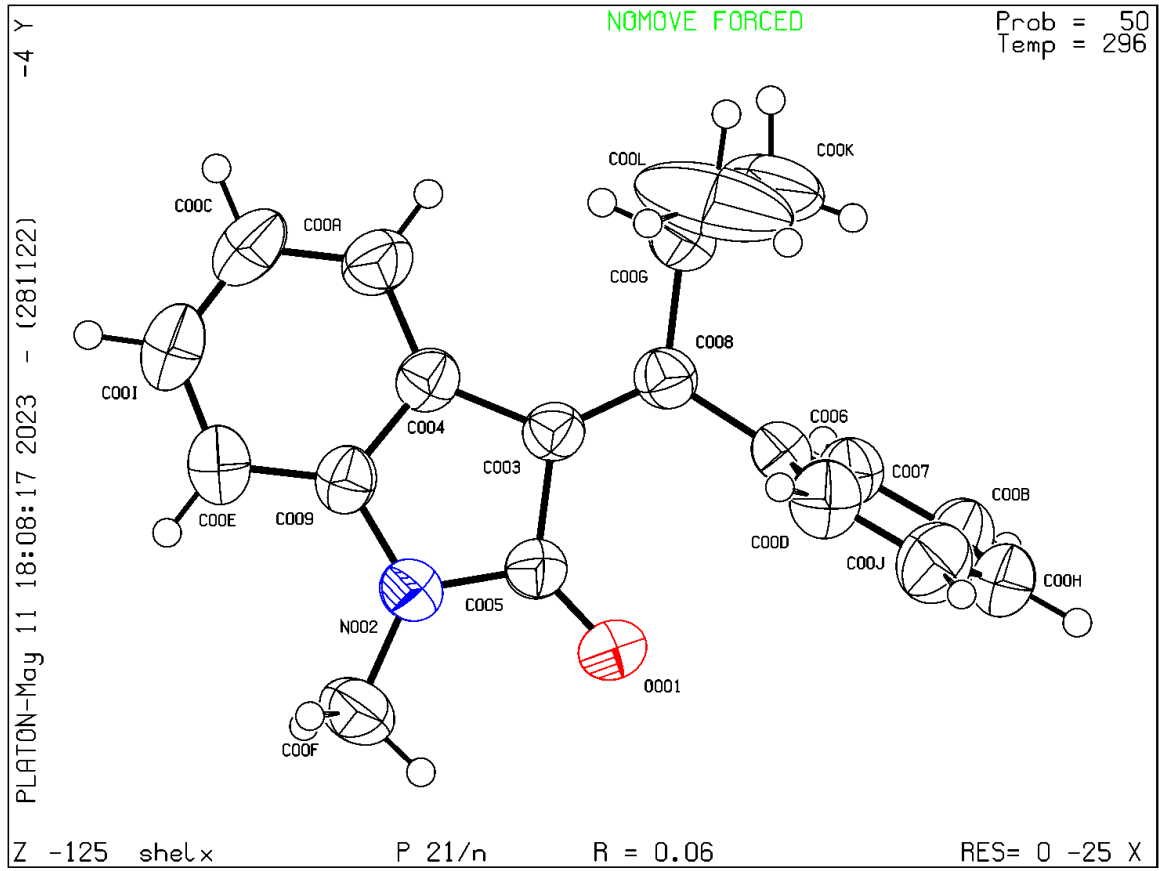

Supplement: d3cc04788a1.pdf [file d3cc04788a1.pdf]
